# Supplementary material for: A TORC1-histone axis regulates chromatin organisation and non-canonical induction of autophagy to ameliorate ageing
Source: eLife. 2021 May 14;10:e62233. doi: 10.7554/eLife.62233 (PMC8186904; doi:10.7554/eLife.62233)
Supplement: Figure 1—figure supplement 1—source data 1. [file elife-62233-fig1-figsupp1-data1.xlsx]

## Sheet: A
Figure 1-Figure supplment 1A
Histone H3
	Control				Rapamycin
10	0.571776	1.64138	1.57201	0.514836	1.00213	0.640477	0.633657	1.4319
30	1.22304	0.749854	0.47995	0.960804	1.42282	0.866072	0.503675	2.13308
50	0.813371	1.42039	1.35074	1.47898	2.58637	1.07762	0.549731	0.798216
Two-way ANOVA	Ordinary
Alpha	0.05
Source of Variation	% of total variation	P value	P value summary	Significant?
Interaction	4.386	0.6535	ns	No
Day	4.53	0.6447	ns	No
Treatment	0.462	0.7654	ns	No
ANOVA table	SS	DF	MS	F (DFn, DFd)	P value
Interaction	0.2984	2	0.1492	F (2, 18) = 0,4356	P=0,6535
Day	0.3082	2	0.1541	F (2, 18) = 0,4499	P=0,6447
Treatment	0.03144	1	0.03144	F (1, 18) = 0,09178	P=0,7654
Residual	6.166	18	0.3425
Number of missing values	0
Tukey's multiple comparisons test	Mean Diff,	95,00% CI of diff,	Significant?	Summary
10:Control vs. 10:Rapamycin	0.148	-1,167 to 1,463	No	ns
10:Control vs. 30:Control	0.2216	-1,094 to 1,537	No	ns
10:Control vs. 30:Rapamycin	-0.1564	-1,472 to 1,159	No	ns
10:Control vs. 50:Control	-0.1909	-1,506 to 1,124	No	ns
10:Control vs. 50:Rapamycin	-0.178	-1,493 to 1,137	No	ns
10:Rapamycin vs. 30:Control	0.07363	-1,242 to 1,389	No	ns
10:Rapamycin vs. 30:Rapamycin	-0.3044	-1,62 to 1,011	No	ns
10:Rapamycin vs. 50:Control	-0.3388	-1,654 to 0,9764	No	ns
10:Rapamycin vs. 50:Rapamycin	-0.3259	-1,641 to 0,9893	No	ns
30:Control vs. 30:Rapamycin	-0.378	-1,693 to 0,9372	No	ns
30:Control vs. 50:Control	-0.4125	-1,728 to 0,9028	No	ns
30:Control vs. 50:Rapamycin	-0.3996	-1,715 to 0,9157	No	ns
30:Rapamycin vs. 50:Control	-0.03446	-1,35 to 1,281	No	ns
30:Rapamycin vs. 50:Rapamycin	-0.02157	-1,337 to 1,294	No	ns
50:Control vs. 50:Rapamycin	0.01289	-1,302 to 1,328	No	ns
Histone H4
	Control				Rapamycin
10	0.81362	1.03349	1.07096	1.08192	0.948813	0.966551	1.08097	1.08282
30	0.920684	1.01207	1.11443	0.996859	1.00802	1.03084	0.988214	1.00777
50	0.927135	0.952784	1.02588	1.01284	1.09579	0.897051	1.09186	0.997918
Two-way ANOVA	Ordinary
Alpha	0.05
Source of Variation	% of total variation	P value	P value summary	Significant?
Interaction	1.549	0.8661	ns	No
Day	0.4163	0.9619	ns	No
Treatment	1.884	0.56	ns	No
ANOVA table	SS	DF	MS	F (DFn, DFd)	P value
Interaction	0.001875	2	0.0009374	F (2, 18) = 0,145	P=0,8661
Day	0.0005039	2	0.000252	F (2, 18) = 0,03897	P=0,9619
Treatment	0.00228	1	0.00228	F (1, 18) = 0,3526	P=0,5600
Residual	0.1164	18	0.006466
Number of missing values	0
Tukey's multiple comparisons test	Mean Diff,	95,00% CI of diff,	Significant?	Summary	Adjusted P Value
10:Control vs. 10:Rapamycin	-0.01979	-0,2005 to 0,1609	No	ns	0.9992
10:Control vs. 30:Control	-0.01101	-0,1917 to 0,1697	No	ns	>0,9999
10:Control vs. 30:Rapamycin	-0.008711	-0,1894 to 0,172	No	ns	>0,9999
10:Control vs. 50:Control	0.02034	-0,1604 to 0,201	No	ns	0.9991
10:Control vs. 50:Rapamycin	-0.02065	-0,2014 to 0,16	No	ns	0.999
10:Rapamycin vs. 30:Control	0.008778	-0,1719 to 0,1895	No	ns	>0,9999
10:Rapamycin vs. 30:Rapamycin	0.01108	-0,1696 to 0,1918	No	ns	>0,9999
10:Rapamycin vs. 50:Control	0.04013	-0,1406 to 0,2208	No	ns	0.9788
10:Rapamycin vs. 50:Rapamycin	-0.0008653	-0,1816 to 0,1798	No	ns	>0,9999
30:Control vs. 30:Rapamycin	0.0023	-0,1784 to 0,183	No	ns	>0,9999
30:Control vs. 50:Control	0.03135	-0,1494 to 0,2121	No	ns	0.993
30:Control vs. 50:Rapamycin	-0.009644	-0,1903 to 0,1711	No	ns	>0,9999
30:Rapamycin vs. 50:Control	0.02905	-0,1517 to 0,2098	No	ns	0.9951
30:Rapamycin vs. 50:Rapamycin	-0.01194	-0,1926 to 0,1688	No	ns	>0,9999
50:Control vs. 50:Rapamycin	-0.04099	-0,2217 to 0,1397	No	ns	0.9768

## Sheet: B
Figure 1-Figure supplment 1B
Histone H3
	Control				Rapamycin
10	0.793895	1.2467	1.18477	0.774638	1.36288	1.47866	1.01373	0.634188
30	1.10632	1.23633	0.803044	0.632799	0.907811	1.15115	0.467694	0.511675
50	0.82462	0.82371	0.702394	0.521399	1.09059	0.490507	0.446756	0.699117
Two-way ANOVA	Ordinary
Alpha	0.05
Source of Variation	% of total variation	P value	P value summary	Significant?
Interaction	4.455	0.5758	ns	No
Day	24.81	0.0661	ns	No
Treatment	0.3077	0.7823	ns	No
ANOVA table	SS	DF	MS	F (DFn, DFd)	P value
Interaction	0.09453	2	0.04727	F (2, 18) = 0,5693	P=0,5758
Day	0.5264	2	0.2632	F (2, 18) = 3,171	P=0,0661
Treatment	0.00653	1	0.00653	F (1, 18) = 0,07865	P=0,7823
Residual	1.494	18	0.08302
Number of missing values	0
Tukey's multiple comparisons test	Mean Diff,	95,00% CI of diff,	Significant?	Summary
10:Control vs. 10:Rapamycin	-0.1224	-0,7698 to 0,5251	No	ns
10:Control vs. 30:Control	0.05538	-0,5921 to 0,7029	No	ns
10:Control vs. 30:Rapamycin	0.2404	-0,4071 to 0,8879	No	ns
10:Control vs. 50:Control	0.282	-0,3655 to 0,9295	No	ns
10:Control vs. 50:Rapamycin	0.3183	-0,3292 to 0,9657	No	ns
10:Rapamycin vs. 30:Control	0.1777	-0,4697 to 0,8252	No	ns
10:Rapamycin vs. 30:Rapamycin	0.3628	-0,2847 to 1,01	No	ns
10:Rapamycin vs. 50:Control	0.4043	-0,2432 to 1,052	No	ns
10:Rapamycin vs. 50:Rapamycin	0.4406	-0,2069 to 1,088	No	ns
30:Control vs. 30:Rapamycin	0.185	-0,4624 to 0,8325	No	ns
30:Control vs. 50:Control	0.2266	-0,4209 to 0,8741	No	ns
30:Control vs. 50:Rapamycin	0.2629	-0,3846 to 0,9104	No	ns
30:Rapamycin vs. 50:Control	0.04155	-0,6059 to 0,689	No	ns
30:Rapamycin vs. 50:Rapamycin	0.07784	-0,5696 to 0,7253	No	ns
50:Control vs. 50:Rapamycin	0.03629	-0,6112 to 0,6838	No	ns
Histone H4
	Control				Rapamycin
10	1.11495	0.966787	0.92796	0.990304	0.919544	0.838498	1.05705	1.05103
30	1.09791	0.886059	0.785014	0.956048	0.873641	0.853039	0.909596	1.00044
50	0.997643	0.818805	0.831603	1.02622	0.9308	0.786482	0.98892	1.0338
Two-way ANOVA	Ordinary
Alpha	0.05
Source of Variation	% of total variation	P value	P value summary	Significant?
Interaction	1.295	0.8782	ns	No
Day	9.103	0.4167	ns	No
Treatment	0.483	0.7584	ns	No
ANOVA table	SS	DF	MS	F (DFn, DFd)	P value
Interaction	0.002735	2	0.001368	F (2, 18) = 0,1308	P=0,8782
Day	0.01922	2	0.009611	F (2, 18) = 0,9193	P=0,4167
Treatment	0.00102	1	0.00102	F (1, 18) = 0,09755	P=0,7584
Residual	0.1882	18	0.01046
Number of missing values	0
Tukey's multiple comparisons test	Mean Diff,	95,00% CI of diff,	Significant?	Summary	Adjusted P Value
10:Control vs. 10:Rapamycin	0.03347	-0,1963 to 0,2632	No	ns	0.9969
10:Control vs. 30:Control	0.06874	-0,161 to 0,2985	No	ns	0.9274
10:Control vs. 30:Rapamycin	0.09082	-0,139 to 0,3206	No	ns	0.8039
10:Control vs. 50:Control	0.08143	-0,1483 to 0,3112	No	ns	0.8642
10:Control vs. 50:Rapamycin	0.065	-0,1648 to 0,2948	No	ns	0.9418
10:Rapamycin vs. 30:Control	0.03527	-0,1945 to 0,2651	No	ns	0.996
10:Rapamycin vs. 30:Rapamycin	0.05735	-0,1724 to 0,2871	No	ns	0.9651
10:Rapamycin vs. 50:Control	0.04796	-0,1818 to 0,2777	No	ns	0.9838
10:Rapamycin vs. 50:Rapamycin	0.03153	-0,1982 to 0,2613	No	ns	0.9977
30:Control vs. 30:Rapamycin	0.02208	-0,2077 to 0,2519	No	ns	0.9996
30:Control vs. 50:Control	0.01269	-0,2171 to 0,2425	No	ns	>0,9999
30:Control vs. 50:Rapamycin	-0.003743	-0,2335 to 0,226	No	ns	>0,9999
30:Rapamycin vs. 50:Control	-0.009388	-0,2392 to 0,2204	No	ns	>0,9999
30:Rapamycin vs. 50:Rapamycin	-0.02582	-0,2556 to 0,204	No	ns	0.9991
50:Control vs. 50:Rapamycin	-0.01643	-0,2462 to 0,2133	No	ns	>0,9999

## Sheet: C
Figure 1-Figure supplment 1C
Histone H3
	Control				Rapamycin
10	1.06931	1.12435	0.981726	0.82461	1.04804	1.13684	0.95272	1.00863
30	1.03761	1.0927	0.993632	0.927331	1.04552	1.01048	0.877386	0.983783
50	1.03902	0.772645	0.949884	0.953113	1.06889	0.902229	0.863428	0.837819
Two-way ANOVA	Ordinary
Alpha	0.05
Source of Variation	% of total variation	P value	P value summary	Significant?
Interaction	2.382	0.7659	ns	No
Day	18.39	0.1528	ns	No
Treatment	0.01769	0.9501	ns	No
ANOVA table	SS	DF	MS	F (DFn, DFd)	P value
Interaction	0.005107	2	0.002553	F (2, 18) = 0,2707	P=0,7659
Day	0.03942	2	0.01971	F (2, 18) = 2,089	P=0,1528
Treatment	3.793e-05	1	3.793e-05	F (1, 18) = 0,004021	P=0,9501
Residual	0.1698	18	0.009433
Number of missing values	0
Tukey's multiple comparisons test	Mean Diff,	95,00% CI of diff,	Significant?	Summary
10:Control vs. 10:Rapamycin	-0.03656	-0,2548 to 0,1817	No	ns
10:Control vs. 30:Control	-0.01282	-0,2311 to 0,2054	No	ns
10:Control vs. 30:Rapamycin	0.02071	-0,1975 to 0,239	No	ns
10:Control vs. 50:Control	0.07133	-0,1469 to 0,2896	No	ns
10:Control vs. 50:Rapamycin	0.08191	-0,1363 to 0,3002	No	ns
10:Rapamycin vs. 30:Control	0.02374	-0,1945 to 0,242	No	ns
10:Rapamycin vs. 30:Rapamycin	0.05727	-0,161 to 0,2755	No	ns
10:Rapamycin vs. 50:Control	0.1079	-0,1104 to 0,3261	No	ns
10:Rapamycin vs. 50:Rapamycin	0.1185	-0,09979 to 0,3367	No	ns
30:Control vs. 30:Rapamycin	0.03353	-0,1847 to 0,2518	No	ns
30:Control vs. 50:Control	0.08415	-0,1341 to 0,3024	No	ns
30:Control vs. 50:Rapamycin	0.09473	-0,1235 to 0,313	No	ns
30:Rapamycin vs. 50:Control	0.05063	-0,1676 to 0,2689	No	ns
30:Rapamycin vs. 50:Rapamycin	0.0612	-0,1571 to 0,2795	No	ns
50:Control vs. 50:Rapamycin	0.01057	-0,2077 to 0,2288	No	ns
Histone H4
	Control				Rapamycin
10	0.81362	1.03349	1.07096	1.08192	0.948813	0.966551	1.08097	1.08282
30	0.920684	1.01207	1.11443	0.996859	1.00802	1.03084	0.988214	1.00777
50	0.927135	0.952784	1.02588	1.01284	1.09579	0.897051	1.09186	0.997918
Two-way ANOVA	Ordinary
Alpha	0.05
Source of Variation	% of total variation	P value	P value summary	Significant?
Interaction	1.549	0.8661	ns	No
Day	0.4163	0.9619	ns	No
Treatment	1.884	0.56	ns	No
ANOVA table	SS	DF	MS	F (DFn, DFd)	P value
Interaction	0.001875	2	0.0009374	F (2, 18) = 0,145	P=0,8661
Day	0.0005039	2	0.000252	F (2, 18) = 0,03897	P=0,9619
Treatment	0.00228	1	0.00228	F (1, 18) = 0,3526	P=0,5600
Residual	0.1164	18	0.006466
Number of missing values	0
Tukey's multiple comparisons test	Mean Diff,	95,00% CI of diff,	Significant?	Summary	Adjusted P Value
10:Control vs. 10:Rapamycin	-0.01979	-0,2005 to 0,1609	No	ns	0.9992
10:Control vs. 30:Control	-0.01101	-0,1917 to 0,1697	No	ns	>0,9999
10:Control vs. 30:Rapamycin	-0.008711	-0,1894 to 0,172	No	ns	>0,9999
10:Control vs. 50:Control	0.02034	-0,1604 to 0,201	No	ns	0.9991
10:Control vs. 50:Rapamycin	-0.02065	-0,2014 to 0,16	No	ns	0.999
10:Rapamycin vs. 30:Control	0.008778	-0,1719 to 0,1895	No	ns	>0,9999
10:Rapamycin vs. 30:Rapamycin	0.01108	-0,1696 to 0,1918	No	ns	>0,9999
10:Rapamycin vs. 50:Control	0.04013	-0,1406 to 0,2208	No	ns	0.9788
10:Rapamycin vs. 50:Rapamycin	-0.0008653	-0,1816 to 0,1798	No	ns	>0,9999
30:Control vs. 30:Rapamycin	0.0023	-0,1784 to 0,183	No	ns	>0,9999
30:Control vs. 50:Control	0.03135	-0,1494 to 0,2121	No	ns	0.993
30:Control vs. 50:Rapamycin	-0.009644	-0,1903 to 0,1711	No	ns	>0,9999
30:Rapamycin vs. 50:Control	0.02905	-0,1517 to 0,2098	No	ns	0.9951
30:Rapamycin vs. 50:Rapamycin	-0.01194	-0,1926 to 0,1688	No	ns	>0,9999
50:Control vs. 50:Rapamycin	-0.04099	-0,2217 to 0,1397	No	ns	0.9768

## Sheet: D
Figure 1-Figure supplment 1D
Histone H3
Gut	FB	Muscle	Brain
1	5.85669	8.35402	8.74577
0.749705	6.70118	8.96453	9.12136
0.939786	5.56102	8.30965	8.43197
0.906855	4.28051	5.47352	10.5593
Data sets analyzed	A : Gut	B : FB	C : Muscle	D : Brain
ANOVA summary
F	48.6
P value	<0,0001
P value summary	****
Significant diff. among means (P < 0.05)?	Yes
R square	0.924
Brown-Forsythe test
F (DFn, DFd)	0,7175 (3, 12)
P value	0.5604
P value summary	ns
Are SDs significantly different (P < 0.05)?	No
Bartlett's test
Bartlett's statistic (corrected)	10.61
P value	0.014
P value summary	*
Are SDs significantly different (P < 0.05)?	Yes
ANOVA table	SS	DF	MS	F (DFn, DFd)
Treatment (between columns)	158.4	3	52.8	F (3, 12) = 48,6
Residual (within columns)	13.04	12	1.086
Total	171.4	15
Data summary
Number of treatments (columns)	4
Number of values (total)	16
Tukey's multiple comparisons test	Mean Diff,	95,00% CI of diff,	Significant?	Summary	Adjusted P Value
Gut vs. FB	-4.701	-6,889 to -2,513	Yes	***	0.0002	A-B
Gut vs. Muscle	-6.876	-9,065 to -4,688	Yes	****	<0,0001	A-C
Gut vs. Brain	-8.316	-10,5 to -6,127	Yes	****	<0,0001	A-D
FB vs. Muscle	-2.176	-4,364 to 0,01262	No	ns	0.0515	B-C
FB vs. Brain	-3.615	-5,803 to -1,427	Yes	**	0.0018	B-D
Muscle vs. Brain	-1.439	-3,627 to 0,749	No	ns	0.2583	C-D
Histone H4
Gut	FB	Muscle	Brain
1	4.06065	10.6366	14.4079
0.90189	3.16587	13.9494	10.0885
1.11378	4.77223	12.9777	13.3022
1.14447	3.51532	10.2984	12.6796
Data sets analyzed	A : Gut	B : FB	C : Muscle	D : Brain
ANOVA summary
F	76.58
P value	<0,0001
P value summary	****
Significant diff. among means (P < 0.05)?	Yes
R square	0.9504
Brown-Forsythe test
F (DFn, DFd)	3,618 (3, 12)
P value	0.0455
P value summary	*
Are SDs significantly different (P < 0.05)?	Yes
Bartlett's test
Bartlett's statistic (corrected)	13.16
P value	0.0043
P value summary	**
Are SDs significantly different (P < 0.05)?	Yes
ANOVA table	SS	DF	MS	F (DFn, DFd)	P value
Treatment (between columns)	403.7	3	134.6	F (3, 12) = 76,58	P<0,0001
Residual (within columns)	21.09	12	1.757
Total	424.8	15
Data summary
Number of treatments (columns)	4
Number of values (total)	16
Tukey's multiple comparisons test	Mean Diff,	95,00% CI of diff,	Significant?	Summary	Adjusted P Value
Gut vs. FB	-2.838	-5,621 to -0,0555	Yes	*	0.0451	A-B
Gut vs. Muscle	-10.93	-13,71 to -8,143	Yes	****	<0,0001	A-C
Gut vs. Brain	-11.58	-14,36 to -8,797	Yes	****	<0,0001	A-D
FB vs. Muscle	-8.087	-10,87 to -5,304	Yes	****	<0,0001	B-C
FB vs. Brain	-8.741	-11,52 to -5,958	Yes	****	<0,0001	B-D
Muscle vs. Brain	-0.654	-3,437 to 2,129	No	ns	0.896	C-D
