# Supplementary material for: A TORC1-histone axis regulates chromatin organisation and non-canonical induction of autophagy to ameliorate ageing
Source: eLife. 2021 May 14;10:e62233. doi: 10.7554/eLife.62233 (PMC8186904; doi:10.7554/eLife.62233)
Supplement: Figure 1—figure supplement 2—source data 1. [file elife-62233-fig1-figsupp2-data1.xlsx]

## Sheet: A
Figure 1-Figure supplment 2A
Histone H3
	Control				Rapamycin
1	1	0.822973	0.843304	0.785315	2.37108	3.06182	3.92619	2.18156
2	0.980242	0.939989	0.852239	1.21286	4.6055	7.15485	8.33409	5.23803
5	1.05568	0.725464	1.45874	1.06988	8.47617	9.32913	9.58383	5.47884
Two-way ANOVA	Ordinary
Alpha	0.05
Source of Variation	% of total variation	P value	P value summary	Significant?
Interaction	12.22	0.0007	***	Yes
Day	14.35	0.0003	***	Yes
Treatment	63.56	<0,0001	****	Yes
ANOVA table	SS	DF	MS	F (DFn, DFd)	P value
Interaction	26.95	2	13.47	F (2, 18) = 11,14	P=0,0007
Day	31.63	2	15.82	F (2, 18) = 13,07	P=0,0003
Treatment	140.1	1	140.1	F (1, 18) = 115,8	P<0,0001
Residual	21.77	18	1.21
Number of missing values	0
Tukey's multiple comparisons test	Mean Diff,	95,00% CI of diff,	Significant?	Summary	Adjusted P Value
1:Control vs. 1:Rapamycin	-2.022	-4,494 to 0,4494	No	ns	0.1478
1:Control vs. 2:Control	-0.1334	-2,605 to 2,338	No	ns	>0,9999
1:Control vs. 2:Rapamycin	-5.47	-7,942 to -2,999	Yes	****	<0,0001
1:Control vs. 5:Control	-0.2145	-2,686 to 2,257	No	ns	0.9997
1:Control vs. 5:Rapamycin	-7.354	-9,826 to -4,882	Yes	****	<0,0001
1:Rapamycin vs. 2:Control	1.889	-0,5828 to 4,36	No	ns	0.1982
1:Rapamycin vs. 2:Rapamycin	-3.448	-5,92 to -0,9763	Yes	**	0.0037
1:Rapamycin vs. 5:Control	1.808	-0,6639 to 4,279	No	ns	0.2349
1:Rapamycin vs. 5:Rapamycin	-5.332	-7,803 to -2,86	Yes	****	<0,0001
2:Control vs. 2:Rapamycin	-5.337	-7,808 to -2,865	Yes	****	<0,0001
2:Control vs. 5:Control	-0.08111	-2,553 to 2,391	No	ns	>0,9999
2:Control vs. 5:Rapamycin	-7.221	-9,692 to -4,749	Yes	****	<0,0001
2:Rapamycin vs. 5:Control	5.256	2,784 to 7,727	Yes	****	<0,0001
2:Rapamycin vs. 5:Rapamycin	-1.884	-4,356 to 0,5878	No	ns	0.2003
5:Control vs. 5:Rapamycin	-7.14	-9,611 to -4,668	Yes	****	<0,0001
Histone H4
	Control				Rapamycin
1	1	1.26178	1.6148	1.72487	2.23099	4.227	4.18741	2.202
2	0.952847	1.00552	1.61216	2.45976	4.48669	5.92832	9.91042	7.5319
5	1.12203	0.979089	2.47195	1.59231	4.97125	10.8044	11.3263	5.03208
Two-way ANOVA	Ordinary
Alpha	0.05
Source of Variation	% of total variation	P value	P value summary	Significant?
Interaction	10.17	0.048	*	Yes
Day	11.42	0.0351	*	Yes
Treatment	53.08	<0,0001	****	Yes
ANOVA table	SS	DF	MS	F (DFn, DFd)	P value
Interaction	24.18	2	12.09	F (2, 18) = 3,612	P=0,0480
Day	27.16	2	13.58	F (2, 18) = 4,057	P=0,0351
Treatment	126.2	1	126.2	F (1, 18) = 37,71	P<0,0001
Residual	60.25	18	3.347
Number of missing values	0
Tukey's multiple comparisons test	Mean Diff,	95,00% CI of diff,	Significant?	Summary	Adjusted P Value
1:Control vs. 1:Rapamycin	-1.811	-5,923 to 2,3	No	ns	0.7265
1:Control vs. 2:Control	-0.1072	-4,219 to 4,004	No	ns	>0,9999
1:Control vs. 2:Rapamycin	-5.564	-9,675 to -1,453	Yes	**	0.0049
1:Control vs. 5:Control	-0.141	-4,252 to 3,97	No	ns	>0,9999
1:Control vs. 5:Rapamycin	-6.633	-10,74 to -2,522	Yes	***	0.0009
1:Rapamycin vs. 2:Control	1.704	-2,407 to 5,816	No	ns	0.7721
1:Rapamycin vs. 2:Rapamycin	-3.752	-7,864 to 0,359	No	ns	0.0855
1:Rapamycin vs. 5:Control	1.671	-2,441 to 5,782	No	ns	0.7859
1:Rapamycin vs. 5:Rapamycin	-4.822	-8,933 to -0,7102	Yes	*	0.0164
2:Control vs. 2:Rapamycin	-5.457	-9,568 to -1,345	Yes	**	0.0058
2:Control vs. 5:Control	-0.03378	-4,145 to 4,078	No	ns	>0,9999
2:Control vs. 5:Rapamycin	-6.526	-10,64 to -2,414	Yes	**	0.001
2:Rapamycin vs. 5:Control	5.423	1,312 to 9,534	Yes	**	0.0062
2:Rapamycin vs. 5:Rapamycin	-1.069	-5,181 to 3,042	No	ns	0.9586
5:Control vs. 5:Rapamycin	-6.492	-10,6 to -2,381	Yes	**	0.0011

## Sheet: B
Figure 1-Figure supplment 2B
Histone H3
	Control				Rapamycin
1	0.869946	0.83025	1.56463	0.735177	0.688717	0.560921	1.16667	0.535801
2	0.922177	0.541679	0.559065	0.646536	0.796386	1.34269	0.767823	0.878663
5		1.11232	0.915182	0.969991	0.694209	0.629241	0.703218	1.26124
Two-way ANOVA	Ordinary
Alpha	0.05
Source of Variation	% of total variation	P value	P value summary	Significant?
Interaction	20.09	0.1399	ns	No
Day	2.451	0.7666	ns	No
Treatment	0.9739	0.6491	ns	No
ANOVA table	SS	DF	MS	F (DFn, DFd)	P value
Interaction	0.3341	2	0.167	F (2, 17) = 2,213	P=0,1399
Day	0.04076	2	0.02038	F (2, 17) = 0,27	P=0,7666
Treatment	0.0162	1	0.0162	F (1, 17) = 0,2146	P=0,6491
Residual	1.283	17	0.07548
Number of missing values	1
Tukey's multiple comparisons test	Mean Diff,	95,00% CI of diff,	Significant?	Summary
1:Control vs. 1:Rapamycin	0.262	-0,3595 to 0,8834	No	ns
1:Control vs. 2:Control	0.3326	-0,2888 to 0,9541	No	ns
1:Control vs. 2:Rapamycin	0.05361	-0,5678 to 0,675	No	ns
1:Control vs. 5:Control	0.0008369	-0,6704 to 0,6721	No	ns
1:Control vs. 5:Rapamycin	0.178	-0,4434 to 0,7994	No	ns
1:Rapamycin vs. 2:Control	0.07066	-0,5508 to 0,6921	No	ns
1:Rapamycin vs. 2:Rapamycin	-0.2084	-0,8298 to 0,4131	No	ns
1:Rapamycin vs. 5:Control	-0.2611	-0,9324 to 0,4101	No	ns
1:Rapamycin vs. 5:Rapamycin	-0.08395	-0,7054 to 0,5375	No	ns
2:Control vs. 2:Rapamycin	-0.279	-0,9005 to 0,3424	No	ns
2:Control vs. 5:Control	-0.3318	-1,003 to 0,3394	No	ns
2:Control vs. 5:Rapamycin	-0.1546	-0,776 to 0,4668	No	ns
2:Rapamycin vs. 5:Control	-0.05277	-0,724 to 0,6184	No	ns
2:Rapamycin vs. 5:Rapamycin	0.1244	-0,497 to 0,7458	No	ns
5:Control vs. 5:Rapamycin	0.1772	-0,494 to 0,8484	No	ns
Histone H4
	Control				Rapamycin
1	0.931371	0.936346	1.31272	0.819568	0.765824	0.637753	1.03314	0.534846
2	1.00128	0.524699	0.586611	0.591419	0.705649	1.27455	0.694631	0.794088
5		1.1319	1.05555	0.851989	0.791053	0.66007	0.779377	1.32848
Two-way ANOVA	Ordinary
Alpha	0.05
Source of Variation	% of total variation	P value	P value summary	Significant?
Interaction	16.21	0.1845	ns	No
Day	9.291	0.3643	ns	No
Treatment	1.739	0.5348	ns	No
ANOVA table	SS	DF	MS	F (DFn, DFd)	P value
Interaction	0.2108	2	0.1054	F (2, 17) = 1,87	P=0,1845
Day	0.1209	2	0.06044	F (2, 17) = 1,072	P=0,3643
Treatment	0.02263	1	0.02263	F (1, 17) = 0,4014	P=0,5348
Residual	0.9583	17	0.05637
Number of missing values	1
Tukey's multiple comparisons test	Mean Diff,	95,00% CI of diff,	Significant?	Summary
1:Control vs. 1:Rapamycin	0.2571	-0,2799 to 0,7941	No	ns
1:Control vs. 2:Control	0.324	-0,213 to 0,861	No	ns
1:Control vs. 2:Rapamycin	0.1328	-0,4042 to 0,6698	No	ns
1:Control vs. 5:Control	-0.01315	-0,5932 to 0,5669	No	ns
1:Control vs. 5:Rapamycin	0.1103	-0,4267 to 0,6473	No	ns
1:Rapamycin vs. 2:Control	0.06689	-0,4701 to 0,6039	No	ns
1:Rapamycin vs. 2:Rapamycin	-0.1243	-0,6613 to 0,4127	No	ns
1:Rapamycin vs. 5:Control	-0.2703	-0,8503 to 0,3098	No	ns
1:Rapamycin vs. 5:Rapamycin	-0.1469	-0,6839 to 0,3901	No	ns
2:Control vs. 2:Rapamycin	-0.1912	-0,7282 to 0,3458	No	ns
2:Control vs. 5:Control	-0.3371	-0,9172 to 0,2429	No	ns
2:Control vs. 5:Rapamycin	-0.2137	-0,7507 to 0,3233	No	ns
2:Rapamycin vs. 5:Control	-0.1459	-0,7259 to 0,4341	No	ns
2:Rapamycin vs. 5:Rapamycin	-0.02251	-0,5595 to 0,5145	No	ns
5:Control vs. 5:Rapamycin	0.1234	-0,4566 to 0,7034	No	ns

## Sheet: C
Figure 1-Figure supplment 2C
Histone H3
	Control				Rapamycin
10	1.0958	0.897483	0.982092	1.02463	0.536393	1.37477	0.675066	1.12435
30	1.59867	2.19428	1.56961		0.621991	0.444961	0.689805	0.782561
50		4.1705	3.88975	4.59708	3.04268		2.1997	1.11026
Two-way ANOVA	Ordinary
Alpha	0.05
Source of Variation	% of total variation	P value	P value summary	Significant?
Interaction	11.43	0.0025	**	Yes
Day	60.33	<0,0001	****	Yes
Treatment	20.18	<0,0001	****	Yes
ANOVA table	SS	DF	MS	F (DFn, DFd)	P value
Interaction	3.581	2	1.79	F (2, 15) = 9,207	P=0,0025
Time	18.9	2	9.451	F (2, 15) = 48,6	P<0,0001
Treatment	6.324	1	6.324	F (1, 15) = 32,52	P<0,0001
Residual	2.917	15	0.1944
Number of missing values	3
Tukey's multiple comparisons test	Mean Diff,	95,00% CI of diff,	Significant?	Summary
10:Control vs. 10:Rapamycin	0.07235	-0,9407 to 1,085	No	ns
10:Control vs. 30:Control	-0.7875	-1,882 to 0,3067	No	ns
10:Control vs. 30:Rapamycin	0.3652	-0,6479 to 1,378	No	ns
10:Control vs. 50:Control	-3.219	-4,313 to -2,125	Yes	****
10:Control vs. 50:Rapamycin	-1.118	-2,212 to -0,02333	Yes	*
10:Rapamycin vs. 30:Control	-0.8599	-1,954 to 0,2343	No	ns
10:Rapamycin vs. 30:Rapamycin	0.2928	-0,7202 to 1,306	No	ns
10:Rapamycin vs. 50:Control	-3.291	-4,386 to -2,197	Yes	****
10:Rapamycin vs. 50:Rapamycin	-1.19	-2,284 to -0,09568	Yes	*
30:Control vs. 30:Rapamycin	1.153	0,05847 to 2,247	Yes	*
30:Control vs. 50:Control	-2.432	-3,601 to -1,262	Yes	****
30:Control vs. 50:Rapamycin	-0.33	-1,5 to 0,8397	No	ns
30:Rapamycin vs. 50:Control	-3.584	-4,679 to -2,49	Yes	****
30:Rapamycin vs. 50:Rapamycin	-1.483	-2,577 to -0,3885	Yes	**
50:Control vs. 50:Rapamycin	2.102	0,9318 to 3,271	Yes	***
Histone H4
	Control				Rapamycin
10	1.07625	0.968809	0.911075	1.04386	0.816737	1.4652	0.90521	1.1021
30	1.58471	2.10196	1.67079	2.97343	0.850022	0.657724	1.12119	1.0253
50		3.08907	3.3909	4.51837	2.58127		2.22775	1.5567
Two-way ANOVA	Ordinary
Alpha	0.05
Source of Variation	% of total variation	P value	P value summary	Significant?
Interaction	11.92	0.0091	**	Yes
Day	56.37	<0,0001	****	Yes
Treatment	19.02	0.0003	***	Yes
ANOVA table	SS	DF	MS	F (DFn, DFd)	P value
Interaction	2.623	2	1.311	F (2, 16) = 6,401	P=0,0091
Time	12.4	2	6.201	F (2, 16) = 30,27	P<0,0001
Treatment	4.185	1	4.185	F (1, 16) = 20,43	P=0,0003
Residual	3.278	16	0.2049
Number of missing values	2
Tukey's multiple comparisons test	Mean Diff,	95,00% CI of diff,	Significant?	Summary
10:Control vs. 10:Rapamycin	-0.07231	-1,104 to 0,959	No	ns
10:Control vs. 30:Control	-1.083	-2,114 to -0,05139	Yes	*
10:Control vs. 30:Rapamycin	0.08644	-0,9449 to 1,118	No	ns
10:Control vs. 50:Control	-2.666	-3,78 to -1,552	Yes	****
10:Control vs. 50:Rapamycin	-1.122	-2,236 to -0,007935	Yes	*
10:Rapamycin vs. 30:Control	-1.01	-2,042 to 0,02092	No	ns
10:Rapamycin vs. 30:Rapamycin	0.1588	-0,8726 to 1,19	No	ns
10:Rapamycin vs. 50:Control	-2.594	-3,708 to -1,48	Yes	****
10:Rapamycin vs. 50:Rapamycin	-1.05	-2,164 to 0,06438	No	ns
30:Control vs. 30:Rapamycin	1.169	0,1378 to 2,2	Yes	*
30:Control vs. 50:Control	-1.583	-2,697 to -0,4694	Yes	**
30:Control vs. 50:Rapamycin	-0.03918	-1,153 to 1,075	No	ns
30:Rapamycin vs. 50:Control	-2.753	-3,867 to -1,639	Yes	****
30:Rapamycin vs. 50:Rapamycin	-1.208	-2,322 to -0,09438	Yes	*
50:Control vs. 50:Rapamycin	1.544	0,3533 to 2,735	Yes	**
