# Supplementary material for: A TORC1-histone axis regulates chromatin organisation and non-canonical induction of autophagy to ameliorate ageing
Source: eLife. 2021 May 14;10:e62233. doi: 10.7554/eLife.62233 (PMC8186904; doi:10.7554/eLife.62233)
Supplement: Figure 1—figure supplement 3—source data 1. [file elife-62233-fig1-figsupp3-data1.xlsx]

## Sheet: 0
Figure 1-Figure supplment 3
Histone H3
	1xSYA				2xSYA
10	1	1.01839	0.863619	1.21506	0.718018	0.525516	0.839366	0.665906
30	0.771499	0.942875	1.31874	1.29333	1.05332	0.888366	1.39731	1.47582
50	1.42507	1.69394	1.84163	1.7739	1.20736	1.11944	1.84865	1.12463
Two-way ANOVA	Ordinary
Alpha	0.05
Source of Variation	% of total variation	P value	P value summary	Significant?
Interaction	9.106	0.1045	ns	No
Day	52.19	0.0002	***	Yes
Treatment	6.773	0.0664	ns	No
ANOVA table	SS	DF	MS	F (DFn, DFd)	P value
Interaction	0.2949	2	0.1475	F (2, 18) = 2,567	P=0,1045
Day	1.69	2	0.8451	F (2, 18) = 14,71	P=0,0002
Treatment	0.2193	1	0.2193	F (1, 18) = 3,818	P=0,0664
Residual	1.034	18	0.05745
Number of missing values	0
Tukey's multiple comparisons test	Mean Diff,	95,00% CI of diff,	Significant?	Summary	Adjusted P Value
10:1xSYA vs. 10:2xSYA	0.3371	-0,2016 to 0,8757	No	ns	0.3856
10:1xSYA vs. 30:1xSYA	-0.05735	-0,596 to 0,4813	No	ns	0.9993
10:1xSYA vs. 30:2xSYA	-0.1794	-0,7181 to 0,3592	No	ns	0.8912
10:1xSYA vs. 50:1xSYA	-0.6594	-1,198 to -0,1207	Yes	*	0.0116
10:1xSYA vs. 50:2xSYA	-0.3008	-0,8394 to 0,2379	No	ns	0.5047
10:2xSYA vs. 30:1xSYA	-0.3944	-0,933 to 0,1442	No	ns	0.2339
10:2xSYA vs. 30:2xSYA	-0.5165	-1,055 to 0,02213	No	ns	0.0646
10:2xSYA vs. 50:1xSYA	-0.9964	-1,535 to -0,4578	Yes	***	0.0002
10:2xSYA vs. 50:2xSYA	-0.6378	-1,176 to -0,09919	Yes	*	0.0152
30:1xSYA vs. 30:2xSYA	-0.1221	-0,6607 to 0,4165	No	ns	0.9768
30:1xSYA vs. 50:1xSYA	-0.602	-1,141 to -0,06339	Yes	*	0.0235
30:1xSYA vs. 50:2xSYA	-0.2434	-0,782 to 0,2952	No	ns	0.7059
30:2xSYA vs. 50:1xSYA	-0.4799	-1,019 to 0,05871	No	ns	0.0973
30:2xSYA vs. 50:2xSYA	-0.1213	-0,6599 to 0,4173	No	ns	0.9775
50:1xSYA vs. 50:2xSYA	0.3586	-0,18 to 0,8972	No	ns	0.3228
Histone H4
	1xSYA				2xSYA
10	1	2.94811	1.45123	1.90143	1.01103	1.10825	1.97081	1.65716
30	2.07282	3.54178	4.40838	4.68646	2.63652	4.92959	4.85174	4.81007
50	2.82578	6.51922	6.75516	11.9891	5.21349	6.40768	5.54483	3.12921
Two-way ANOVA	Ordinary
Alpha	0.05
Source of Variation	% of total variation	P value	P value summary	Significant?
Interaction	4.625	0.3774	ns	No
Day	53.6	0.0005	***	Yes
Treatment	1.332	0.4513	ns	No
ANOVA table	SS	DF	MS	F (DFn, DFd)	P value
Interaction	6.745	2	3.372	F (2, 18) = 1,029	P=0,3774
Day	78.17	2	39.08	F (2, 18) = 11,93	P=0,0005
Treatment	1.943	1	1.943	F (1, 18) = 0,5929	P=0,4513
Residual	58.99	18	3.277
Number of missing values	0
Tukey's multiple comparisons test	Mean Diff,	95,00% CI of diff,	Significant?	Summary	Adjusted P Value
10:1xSYA vs. 10:2xSYA	0.3884	-3,68 to 4,457	No	ns	0.9996
10:1xSYA vs. 30:1xSYA	-1.852	-5,92 to 2,216	No	ns	0.6997
10:1xSYA vs. 30:2xSYA	-2.482	-6,55 to 1,586	No	ns	0.4121
10:1xSYA vs. 50:1xSYA	-5.197	-9,265 to -1,129	Yes	**	0.0081
10:1xSYA vs. 50:2xSYA	-3.249	-7,317 to 0,8196	No	ns	0.1648
10:2xSYA vs. 30:1xSYA	-2.241	-6,309 to 1,828	No	ns	0.5189
10:2xSYA vs. 30:2xSYA	-2.87	-6,938 to 1,198	No	ns	0.2672
10:2xSYA vs. 50:1xSYA	-5.586	-9,654 to -1,517	Yes	**	0.0043
10:2xSYA vs. 50:2xSYA	-3.637	-7,705 to 0,4312	No	ns	0.0956
30:1xSYA vs. 30:2xSYA	-0.6296	-4,698 to 3,439	No	ns	0.9959
30:1xSYA vs. 50:1xSYA	-3.345	-7,413 to 0,7232	No	ns	0.1446
30:1xSYA vs. 50:2xSYA	-1.396	-5,465 to 2,672	No	ns	0.8787
30:2xSYA vs. 50:1xSYA	-2.715	-6,784 to 1,353	No	ns	0.3203
30:2xSYA vs. 50:2xSYA	-0.7668	-4,835 to 3,301	No	ns	0.9898
50:1xSYA vs. 50:2xSYA	1.949	-2,12 to 6,017	No	ns	0.6554
