# Supplementary material for: A TORC1-histone axis regulates chromatin organisation and non-canonical induction of autophagy to ameliorate ageing
Source: eLife. 2021 May 14;10:e62233. doi: 10.7554/eLife.62233 (PMC8186904; doi:10.7554/eLife.62233)
Supplement: Figure 1—source data 1. [file elife-62233-fig1-data1.xlsx]

## Sheet: A
Figure 1A
day	wDah+EtOH	wDah+Rapamycin
0	1	1
2	1	1
5	1	1
7	1	1
9	1	1
12	1	1
14	1	1
18	1	1
20	1	1
23	0.993333	1
26	0.993333	1
28	0.993333	0.993289
30	0.993333	0.993289
33	0.993333	0.993289
35	0.986667	0.993289
37	0.986667	0.986577
40	0.986667	0.986577
42	0.98	0.986577
44	0.973333	0.986577
47	0.953333	0.986577
49	0.946667	0.979866
51	0.926667	0.95302
54	0.9	0.95302
56	0.859702	0.95302
58	0.80597	0.926175
61	0.785821	0.885906
63	0.725373	0.845638
65	0.651493	0.765101
68	0.570896	0.724832
70	0.497015	0.697987
72	0.396269	0.604027
75	0.275373	0.516779
77	0.154478	0.442953
79	0.0537313	0.241611
82	0.0134328	0.167785
84	0.00671642	0.107383
86	0	0.0469799
89		0.0201342
91		0.00671141
93		0

## Sheet: C
Figure 1C
Histone H3
	Control				Rapamycin
10	0.349581	2.30746	0.853175	0.489783	7.19351	7.38936	11.2834	6.10295
30	0.599068	0.843184	1.82747	2.17567	11.6263	7.13474	10.5417	7.45705
50	3.37572	5.41931	4.15811	5.89471	14.8017	13.4227	15.0908	23.3572
Two-way ANOVA	Ordinary
Alpha	0.05
Source of Variation	% of total variation	P value	P value summary	Significant?
Interaction	3.584	0.1061	ns	No
day	23.11	<0,0001	****	Yes
treatment	60.65	<0,0001	****	Yes
ANOVA table	SS	DF	MS	F (DFn, DFd)	P value
Interaction	28.25	2	14.13	F (2, 18) = 2,548	P=0,1061
day	182.1	2	91.05	F (2, 18) = 16,43	P<0,0001
treatment	478	1	478	F (1, 18) = 86,23	P<0,0001
Residual	99.78	18	5.543
Number of missing values	0
Tukey's multiple comparisons test	Mean Diff,	95,00% CI of diff,	Significant?	Summary	Adjusted P Value
10:Control vs. 10:Rapamycin	-6.992	-12,28 to -1,702	Yes	**	0.006
10:Control vs. 30:Control	-0.3613	-5,652 to 4,929	No	ns	>0,9999
10:Control vs. 30:Rapamycin	-8.19	-13,48 to -2,899	Yes	**	0.0013
10:Control vs. 50:Control	-3.712	-9,003 to 1,579	No	ns	0.2724
10:Control vs. 50:Rapamycin	-15.67	-20,96 to -10,38	Yes	****	<0,0001
10:Rapamycin vs. 30:Control	6.631	1,34 to 11,92	Yes	**	0.0096
10:Rapamycin vs. 30:Rapamycin	-1.198	-6,488 to 4,093	No	ns	0.977
10:Rapamycin vs. 50:Control	3.28	-2,01 to 8,571	No	ns	0.3952
10:Rapamycin vs. 50:Rapamycin	-8.676	-13,97 to -3,385	Yes	***	0.0007
30:Control vs. 30:Rapamycin	-7.829	-13,12 to -2,538	Yes	**	0.0021
30:Control vs. 50:Control	-3.351	-8,641 to 1,94	No	ns	0.3733
30:Control vs. 50:Rapamycin	-15.31	-20,6 to -10,02	Yes	****	<0,0001
30:Rapamycin vs. 50:Control	4.478	-0,8128 to 9,769	No	ns	0.1261
30:Rapamycin vs. 50:Rapamycin	-7.478	-12,77 to -2,187	Yes	**	0.0033
50:Control vs. 50:Rapamycin	-11.96	-17,25 to -6,665	Yes	****	<0,0001
Histone H4
	Control				Rapamycin
10	1	1.31487	0.8287	0.949642	7.12622	5.52567	4.11421	2.89967
30	2.08974	1.36248	1.27708	2.07059	7.57372	9.59546	10.7555	7.39224
50	2.50976	2.36023	3.41139	2.69435	7.65529	8.24213	9.17399	5.06286
Two-way ANOVA	Ordinary
Alpha	0.05
Source of Variation	% of total variation	P value	P value summary	Significant?
Interaction	4.791	0.0514	ns	No
Day	11.43	0.0027	**	Yes
Treatment	71.52	<0,0001	****	Yes
ANOVA table	SS	DF	MS	F (DFn, DFd)	P value
Interaction	11.17	2	5.583	F (2, 18) = 3,517	P=0,0514
Day	26.63	2	13.31	F (2, 18) = 8,386	P=0,0027
Treatment	166.7	1	166.7	F (1, 18) = 105	P<0,0001
Residual	28.58	18	1.588
Number of missing values	0
Tukey's multiple comparisons test	Mean Diff,	95,00% CI of diff,	Significant?	Summary	Adjusted P Value
10:Control vs. 10:Rapamycin	-3.893	-6,725 to -1,062	Yes	**	0.0042
10:Control vs. 30:Control	-0.6767	-3,508 to 2,155	No	ns	0.971
10:Control vs. 30:Rapamycin	-7.806	-10,64 to -4,974	Yes	****	<0,0001
10:Control vs. 50:Control	-1.721	-4,552 to 1,111	No	ns	0.4162
10:Control vs. 50:Rapamycin	-6.51	-9,342 to -3,679	Yes	****	<0,0001
10:Rapamycin vs. 30:Control	3.216	0,385 to 6,048	Yes	*	0.0208
10:Rapamycin vs. 30:Rapamycin	-3.913	-6,744 to -1,081	Yes	**	0.004
10:Rapamycin vs. 50:Control	2.173	-0,659 to 5,004	No	ns	0.195
10:Rapamycin vs. 50:Rapamycin	-2.617	-5,449 to 0,2144	No	ns	0.0797
30:Control vs. 30:Rapamycin	-7.129	-9,961 to -4,298	Yes	****	<0,0001
30:Control vs. 50:Control	-1.044	-3,875 to 1,788	No	ns	0.8443
30:Control vs. 50:Rapamycin	-5.834	-8,665 to -3,002	Yes	****	<0,0001
30:Rapamycin vs. 50:Control	6.085	3,254 to 8,917	Yes	****	<0,0001
30:Rapamycin vs. 50:Rapamycin	1.296	-1,536 to 4,127	No	ns	0.6955
50:Control vs. 50:Rapamycin	-4.79	-7,621 to -1,958	Yes	***	0.0005
