# Supplementary material for: A TORC1-histone axis regulates chromatin organisation and non-canonical induction of autophagy to ameliorate ageing
Source: eLife. 2021 May 14;10:e62233. doi: 10.7554/eLife.62233 (PMC8186904; doi:10.7554/eLife.62233)
Supplement: Figure 2—figure supplement 1—source data 1. [file elife-62233-fig2-figsupp1-data1.xlsx]

## Sheet: B
Figure 2-Figure supplement 1B
	D2 EtOH						D2 Rapa						D20 EtOH						D20 Rapa
EC	61	59	60	67	61	64	65	59	71	62	63	58	56	61	58	59	65	49	65	70	57	53	64	67
esg-GFP+	30	28	26	22	27	22	26	27	23	29	28	31	30	28	27	27	22	32	20	20	27	29	25	23
EE	9	13	14	11	11	13	9	14	6	9	9	11	15	12	13	13	14	17	15	10	16	17	11	10
PH3+	0	0	0	0	1	0	0	0	0	0	0	0	0	0	1	1	0	1	0	0	0	0	0	0
Two-way ANOVA	Ordinary
Alpha	0.05
Source of Variation	% of total variation	P value	P value summary	Significant?
Interaction	0.4106	0.0271	*	Yes
cell types	97.96	<0,0001	****	Yes
treatment	0.0002218	0.9997	ns	No
ANOVA table	SS	DF	MS	F (DFn, DFd)	P value
Interaction	212.2	9	23.58	F (9, 80) = 2,245	P=0,0271
cell types	50617	3	16872	F (3, 80) = 1607	P<0,0001
treatment	0.1146	3	0.03819	F (3, 80) = 0,003637	P=0,9997
Residual	840.2	80	10.5
Number of missing values	0

## Sheet: C
Figure 2-Figure supplement 1C
	Control					Rapamycin
2	16.3212	20.8608	15.6079	13.0085	18.3682	19.2838	18.3145	13.5455	16.1076	19.4811
20	12.2881	23.8975	15.353	16.1878	10.6709	18.5161	11.3774	18.147	18.6096	14.6825
Two-way ANOVA	Ordinary
Alpha	0.05
Source of Variation	% of total variation	P value	P value summary	Significant?
Interaction	0.003201	0.9819	ns	No
Day	2.929	0.4955	ns	No
Treatment	0.7106	0.7357	ns	No
ANOVA table	SS	DF	MS	F (DFn, DFd)	P value
Interaction	0.006815	1	0.006815	F (1, 16) = 0,0005314	P=0,9819
Day	6.238	1	6.238	F (1, 16) = 0,4864	P=0,4955
Treatment	1.513	1	1.513	F (1, 16) = 0,118	P=0,7357
Residual	205.2	16	12.82
Number of missing values	0
Tukey's multiple comparisons test	Mean Diff,	95,00% CI of diff,	Significant?	Summary	Adjusted P Value
D2:D2 EtOH vs. D2:D2 Rapa	-0.5132	-6,993 to 5,967	No	ns	0.9957
D2:D2 EtOH vs. D20:D2 EtOH	1.154	-5,326 to 7,634	No	ns	0.9556
D2:D2 EtOH vs. D20:D2 Rapa	0.5668	-5,913 to 7,047	No	ns	0.9943
D2:D2 Rapa vs. D20:D2 EtOH	1.667	-4,813 to 8,147	No	ns	0.8812
D2:D2 Rapa vs. D20:D2 Rapa	1.08	-5,4 to 7,56	No	ns	0.9631
D20:D2 EtOH vs. D20:D2 Rapa	-0.587	-7,067 to 5,893	No	ns	0.9936
