# Supplementary material for: A TORC1-histone axis regulates chromatin organisation and non-canonical induction of autophagy to ameliorate ageing
Source: eLife. 2021 May 14;10:e62233. doi: 10.7554/eLife.62233 (PMC8186904; doi:10.7554/eLife.62233)
Supplement: Figure 2—figure supplement 2—source data 1. [file elife-62233-fig2-figsupp2-data1.xlsx]

## Sheet: A
Figure 2-Figure supplement 2A
Histone H3
Control	RU	Rapa	Rapa+RU
1.07177	2.77002	4.71983	4.01799
0.88545	1.48256	3.92935	4.56426
0.867278	1.92351	3.90477	2.76563
1.1755	1.26557	4.21759	2.77634
Df Sum Sq Mean Sq F value Pr(>F)
RU 1 0.039 0.039 0.110 0.7454
Rapamycin 1 23.654 23.654 66.234 3.15e-06 ***
RU:Rapamycin 1 2.317 2.317 6.489 0.0556
Residuals 12 4.285 0.357
---
Signif. codes: 0 ‘***’ 0.001 ‘**’ 0.01 ‘*’ 0.05 ‘.’ 0.1 ‘ ’ 1
Tukey multiple comparisons of means
95% family-wise confidence level
Fit: aov(formula = Intensity ~ RU * Rapamycin, data = ANOVA_test_H3)
$RU
diff lwr upr p adj
RU-Control 0.09929247 -0.5517352 0.7503202 0.7453918
$Rapamycin
diff lwr upr p adj
Rapamycin-Control 2.431762 1.780735 3.08279 3.2e-06
$`RU:Rapamycin`
diff lwr upr p adj
RU:Control-Control:Control 0.8604133 -0.3941433 2.1149700 0.2286553
Control:Rapamycin-Control:Control 3.1928833 1.9383267 4.4474399 0.0000346
RU:Rapamycin-Control:Control 2.5310549 1.2764983 3.7856115 0.0003185
Control:Rapamycin-RU:Control 2.3324700 1.0779133 3.5870266 0.0006586
RU:Rapamycin-RU:Control 1.6706415 0.4160849 2.9251982 0.0089560
RU:Rapamycin-Control:Rapamycin -0.6618284 -1.9163850 0.5927282 0.4319398
Histone H4
Control	RU	Rapa	Rapa+RU
0.976978	2.21941	3.61523	2.43384
0.825014	1.28969	2.75015	3.15564
0.93283	1.41485	2.90202	2.59695
1.26518	1.2142	1.81281	1.13112
Df Sum Sq Mean Sq F value Pr(>F)
RU 1 0.009 0.009 0.023 0.88202
Rapamycin 1 6.579 6.579 17.157 0.00137 **
RU:Rapamycin 1 0.951 0.951 2.480 0.14127
Residuals 12 4.601 0.383
---
Signif. codes: 0 ‘***’ 0.001 ‘**’ 0.01 ‘*’ 0.05 ‘.’ 0.1 ‘ ’ 1
Tukey multiple comparisons of means
95% family-wise confidence level
Fit: aov(formula = Intensity ~ RU * Rapamycin, data = ANOVA_test_H4)
$RU
diff lwr upr p adj
RU-Control 0.0469375 -0.6276599 0.7215349 0.8820224
$Rapamycin
diff lwr upr p adj
Rapamycin-Control 1.28245 0.6078527 1.957048 0.0013658
$`RU:Rapamycin`
diff lwr upr p adj
RU:Control-Control:Control 0.5345391 -0.7654374 1.8345155 0.6262104
Control:Rapamycin-Control:Control 1.7700517 0.4700753 3.0700282 0.0076747
RU:Rapamycin-Control:Control 1.3293877 0.0294112 2.6293642 0.0445152
Control:Rapamycin-RU:Control 1.2355127 -0.0644638 2.5354892 0.0643830
RU:Rapamycin-RU:Control 0.7948486 -0.5051279 2.0948251 0.3132464
RU:Rapamycin-Control:Rapamycin -0.4406641 -1.7406405 0.8593124 0.7488138

## Sheet: B
Figure 2-Figure supplement 2B
Histone H3
Control	Bor	Rapa	Rapa+Bor
1.02229	1.26121	3.099	3.30964
0.873638	1.30071	2.96115	3.15014
1.05619	1.14039	2.15827	3.49344
1.04788	1.86572	2.68201	2.75693
Df Sum Sq Mean Sq F value Pr(>F)
Bor 1 0.713 0.713 7.450 0.0183 *
Rapamycin 1 12.325 12.325 128.756 9e-08 ***
Bor:Rapamycin 1 0.004 0.004 0.038 0.8484
Residuals 12 1.149 0.096
---
Signif. codes: 0 ‘***’ 0.001 ‘**’ 0.01 ‘*’ 0.05 ‘.’ 0.1 ‘ ’ 1
Tukey multiple comparisons of means
95% family-wise confidence level
Fit: aov(formula = Intensity ~ Bor * Rapamycin, data = ANOVA_test_H3)
$Bor
diff lwr upr p adj
Control-Bor -0.4222183 -0.7592669 -0.0851696 0.0182874
$Rapamycin
diff lwr upr p adj
Rapamycin-Control 1.755319 1.41827 2.092368 1e-07
$`Bor:Rapamycin`
diff lwr upr p adj
Control:Control-Bor:Control -0.3920059 -1.0415123 0.2575005 0.3233830
Bor:Rapamycin-Bor:Control 1.7855313 1.1360249 2.4350377 0.0000159
Control:Rapamycin-Bor:Control 1.3331006 0.6835942 1.9826070 0.0002723
Bor:Rapamycin-Control:Control 2.1775372 1.5280308 2.8270436 0.0000020
Control:Rapamycin-Control:Control 1.7251065 1.0756001 2.3746129 0.0000225
Control:Rapamycin-Bor:Rapamycin -0.4524307 -1.1019371 0.1970757 0.2180632
Histone H4
Control	Bor	Rapa	Rapa+Bor
1.20208	1.8035	2.05908	2.03324
0.90095	1.68023	2.66171	2.23324
0.777265	1.11785	1.96638	1.70649
1.11971	1.51468	1.85412	2.33162
Df Sum Sq Mean Sq F value Pr(>F)
Bor 1 0.2208 0.2208 2.647 0.1297
Rapamycin 1 2.8305 2.8305 33.932 8.15e-05 ***
Bor:Rapamycin 1 0.3460 0.3460 4.148 0.0644 .
Residuals 12 1.0010 0.0834
---
Signif. codes: 0 ‘***’ 0.001 ‘**’ 0.01 ‘*’ 0.05 ‘.’ 0.1 ‘ ’ 1
Tukey multiple comparisons of means
95% family-wise confidence level
Fit: aov(formula = Intensity ~ Bor * Rapamycin, data = ANOVA_test_H4)
$Bor
diff lwr upr p adj
Control-Bor -0.2349451 -0.5495872 0.07969707 0.1297064
$Rapamycin
diff lwr upr p adj
Rapamycin-Control 0.8412024 0.5265603 1.155845 8.15e-05
$`Bor:Rapamycin`
diff lwr upr p adj
Control:Control-Bor:Control -0.52906511 -1.135393e+00 0.0772630 0.0950837
Bor:Rapamycin-Bor:Control 0.54708240 -5.924571e-02 1.1534105 0.0820309
Control:Rapamycin-Bor:Control 0.60625735 -7.076198e-05 1.2125855 0.0500299
Bor:Rapamycin-Control:Control 1.07614751 4.698194e-01 1.6824756 0.0009811
Control:Rapamycin-Control:Control 1.13532246 5.289943e-01 1.7416506 0.0006190
Control:Rapamycin-Bor:Rapamycin 0.05917495 -5.471532e-01 0.6655031 0.9910846
