# Supplementary material for: A TORC1-histone axis regulates chromatin organisation and non-canonical induction of autophagy to ameliorate ageing
Source: eLife. 2021 May 14;10:e62233. doi: 10.7554/eLife.62233 (PMC8186904; doi:10.7554/eLife.62233)
Supplement: Figure 2—source data 1. [file elife-62233-fig2-data1.xlsx]

## Sheet: A
Figure 2A
Histone H3
Control	CHX	Rapa	Rapa+CHX
1	0.953878	1.71219	1.34102
1.06733	1.13922	2.62791	1.35264
0.62236	1.0039	1.30119	1.15513
0.600613	1.26209	3.09448	1.16047
Df Sum Sq Mean Sq F value Pr(>F)
CHX 1 0.4415 0.4415 2.301 0.15520
Rapamycin 1 2.3223 2.3223 12.103 0.00456 **
CHX:Rapamycin 1 1.4372 1.4372 7.490 0.01804 *
Residuals 12 2.3025 0.1919
---
Signif. codes: 0 ‘***’ 0.001 ‘**’ 0.01 ‘*’ 0.05 ‘.’ 0.1 ‘ ’ 1
Tukey multiple comparisons of means
95% family-wise confidence level
Fit: aov(formula = Intensity ~ CHX * Rapamycin, data = ANOVA_test_H3)
$CHX
diff lwr upr p adj
Control-CHX 0.3322163 -0.1449835 0.8094161 0.1551996
$Rapamycin
diff lwr upr p adj
Rapamycin-Control 0.7619567 0.2847569 1.239157 0.0045551
$`CHX:Rapamycin`
diff lwr upr p adj
Control:Control-CHX:Control -0.2671964 -1.18677968 0.6523869 0.8236607
CHX:Rapamycin-CHX:Control 0.1625440 -0.75703926 1.0821273 0.9514462
Control:Rapamycin-CHX:Control 1.0941730 0.17458972 2.0137563 0.0186961
CHX:Rapamycin-Control:Control 0.4297404 -0.48984287 1.3493237 0.5297617
Control:Rapamycin-Control:Control 1.3613694 0.44178610 2.2809527 0.0041830
Control:Rapamycin-CHX:Rapamycin 0.9316290 0.01204568 1.8512123 0.0467496
Histone H4
Control	CHX	Rapa	Rapa+CHX
1	0.741536	2.17085	0.623271
1.20655	0.724338	2.95734	0.755891
0.925082	0.764095	1.41651	0.683927
0.715114	0.685552	3.14979	0.76947
Df Sum Sq Mean Sq F value Pr(>F)
CHX 1 3.796 3.796 22.43 0.000484 ***
Rapamycin 1 2.077 2.077 12.27 0.004357 **
CHX:Rapamycin 1 2.198 2.198 12.99 0.003620 **
Residuals 12 2.031 0.169
---
Signif. codes: 0 ‘***’ 0.001 ‘**’ 0.01 ‘*’ 0.05 ‘.’ 0.1 ‘ ’ 1
Tukey multiple comparisons of means
95% family-wise confidence level
Fit: aov(formula = Intensity ~ CHX * Rapamycin, data = ANOVA_test_H3)
$CHX
diff lwr upr p adj
Control-CHX 0.9741427 0.5259574 1.422328 0.0004838
$Rapamycin
diff lwr upr p adj
Rapamycin-Control 0.7205964 0.2724111 1.168782 0.0043568
$`CHX:Rapamycin`
diff lwr upr p adj
Control:Control-CHX:Control 0.23280567 -0.6308654 1.0964768 0.8529956
CHX:Rapamycin-CHX:Control -0.02074063 -0.8844117 0.8429305 0.9998622
Control:Rapamycin-CHX:Control 1.69473902 0.8310679 2.5584101 0.0004091
CHX:Rapamycin-Control:Control -0.25354630 -1.1172174 0.6101248 0.8192888
Control:Rapamycin-Control:Control 1.46193335 0.5982622 2.3256045 0.0014576
Control:Rapamycin-CHX:Rapamycin 1.71547965 0.8518085 2.5791508 0.0003667

## Sheet: B
Figure 2B
Histone H3
Control	RU	Rapa	Rapa+RU
1	1.36827	4.65109	3.09566
1.07862	2.38681	6.26075	2.375
1.41216	1.66331	12.4252	3.7213
1.89279	2.09197	9.64892	2.06201
Df Sum Sq Mean Sq F value Pr(>F)
RU 1 24.02 24.02 7.379 0.018728 *
Rapamycin 1 61.41 61.41 18.864 0.000956 ***
RU:Rapamycin 1 35.58 35.58 10.929 0.006272 **
Residuals 12 39.06 3.26
---
Signif. codes: 0 ‘***’ 0.001 ‘**’ 0.01 ‘*’ 0.05 ‘.’ 0.1 ‘ ’ 1
Tukey multiple comparisons of means
95% family-wise confidence level
Fit: aov(formula = Intensity ~ RU * Rapamycin, data = ANOVA_test_H3)
$RU
diff lwr upr p adj
RU-Control -2.450646 -4.41622 -0.4850723 0.0187284
$Rapamycin
diff lwr upr p adj
Rapamycin-Control 3.918248 1.952674 5.883822 0.000956
$`RU:Rapamycin`
diff lwr upr p adj
RU:Control-Control:Control 0.5316992 -3.256041 4.319439 0.9745405
Control:Rapamycin-Control:Control 6.9005935 3.112853 10.688334 0.0007851
RU:Rapamycin-Control:Control 1.4676022 -2.320138 5.255342 0.6672299
Control:Rapamycin-RU:Control 6.3688943 2.581154 10.156634 0.0015396
RU:Rapamycin-RU:Control 0.9359030 -2.851837 4.723643 0.8817575
RU:Rapamycin-Control:Rapamycin -5.4329913 -9.220731 -1.645251 0.0052861
Histone H4
Control	RU	Rapa	Rapa+RU
1	1.0494	2.94512	1.69685
1.00669	2.04519	3.21559	1.85952
0.898694	1.44239	2.28427	1.56238
1.184	1.17499	2.66857	1.29629
Df Sum Sq Mean Sq F value Pr(>F)
RU 1 0.591 0.591 5.56 0.036178 *
Rapamycin 1 3.732 3.732 35.09 6.99e-05 ***
RU:Rapamycin 1 2.497 2.497 23.48 0.000401 ***
Residuals 12 1.276 0.106
---
Signif. codes: 0 ‘***’ 0.001 ‘**’ 0.01 ‘*’ 0.05 ‘.’ 0.1 ‘ ’ 1
Tukey multiple comparisons of means
95% family-wise confidence level
Fit: aov(formula = Intensity ~ RU * Rapamycin, data = ANOVA_test_H4)
$RU
diff lwr upr p adj
RU-Control -0.3844906 -0.7397533 -0.02922783 0.0361783
$Rapamycin
diff lwr upr p adj
Rapamycin-Control 0.965905 0.6106423 1.321168 6.99e-05
$`RU:Rapamycin`
diff lwr upr p adj
RU:Control-Control:Control 0.4056476 -0.2789580 1.0902533 0.3379089
Control:Rapamycin-Control:Control 1.7560432 1.0714376 2.4406488 0.0000320
RU:Rapamycin-Control:Control 0.5814144 -0.1031912 1.2660201 0.1066281
Control:Rapamycin-RU:Control 1.3503956 0.6657899 2.0350012 0.0003904
RU:Rapamycin-RU:Control 0.1757668 -0.5088389 0.8603724 0.8697487
RU:Rapamycin-Control:Rapamycin -1.1746288 -1.8592344 -0.4900231 0.0013033

## Sheet: C
Figure 2C
Histone H3
Control	RU	Rapa	Rapa+RU
1	0.797334	2.6013	2.42099
0.791735	1.19001	2.66205	1.09848
0.868188	0.78269	2.8574	1.22982
Df Sum Sq Mean Sq F value Pr(>F)
RU 1 0.886 0.886 5.781 0.042878 *
Rapamycin 1 4.613 4.613 30.088 0.000584 ***
RU:Rapamycin 1 1.010 1.010 6.589 0.033292 *
Residuals 8 1.227 0.153
---
Signif. codes: 0 ‘***’ 0.001 ‘**’ 0.01 ‘*’ 0.05 ‘.’ 0.1 ‘ ’ 1
4 observations deleted due to missingness
Tukey multiple comparisons of means
95% family-wise confidence level
Fit: aov(formula = Intensity ~ RU * Rapamycin, data = ANOVA_test_H3)
$RU
diff lwr upr p adj
RU-Control -0.5435572 -1.06486 -0.02225428 0.0428781
$Rapamycin
diff lwr upr p adj
Rapamycin-Control 1.240014 0.7187107 1.761317 0.0005838
$`RU:Rapamycin`
diff lwr upr p adj
RU:Control-Control:Control 0.03670483 -0.9870929 1.0605026 0.9994113
Control:Rapamycin-Control:Control 1.82027577 0.7964780 2.8440735 0.0020460
RU:Rapamycin-Control:Control 0.69645646 -0.3273413 1.7202542 0.2087290
Control:Rapamycin-RU:Control 1.78357093 0.7597732 2.8073687 0.0023321
RU:Rapamycin-RU:Control 0.65975163 -0.3640461 1.6835494 0.2430490
RU:Rapamycin-Control:Rapamycin -1.12381931 -2.1476171 -0.1000216 0.0322845
Histone H4
Control	RU	Rapa	Rapa+RU
1	0.602694	1.84289	0.897695
0.598981	0.76694	1.61196	0.587414
0.816283	0.614207	1.38561	1.07998
Df Sum Sq Mean Sq F value Pr(>F)
RU 1 0.6106 0.6106 14.983 0.00474 **
Rapamycin 1 0.7532 0.7532 18.483 0.00262 **
RU:Rapamycin 1 0.2833 0.2833 6.953 0.02986 *
Residuals 8 0.3260 0.0408
---
Signif. codes: 0 ‘***’ 0.001 ‘**’ 0.01 ‘*’ 0.05 ‘.’ 0.1 ‘ ’ 1
4 observations deleted due to missingness
Tukey multiple comparisons of means
95% family-wise confidence level
Fit: aov(formula = Intensity ~ RU * Rapamycin, data = ANOVA_test_H4)
$RU
diff lwr upr p adj
RU-Control -0.45113 -0.719893 -0.1823671 0.0047365
$Rapamycin
diff lwr upr p adj
Rapamycin-Control 0.5010732 0.2323102 0.7698361 0.0026184
$`RU:Rapamycin`
diff lwr upr p adj
RU:Control-Control:Control -0.14380738 -0.6716366 0.3840218 0.8188781
Control:Rapamycin-Control:Control 0.80839585 0.2805667 1.3362250 0.0051981
RU:Rapamycin-Control:Control 0.04994315 -0.4778860 0.5777723 0.9896026
Control:Rapamycin-RU:Control 0.95220323 0.4243740 1.4800324 0.0018624
RU:Rapamycin-RU:Control 0.19375053 -0.3340787 0.7215797 0.6573724
RU:Rapamycin-Control:Rapamycin -0.75845270 -1.2862819 -0.2306235 0.0075922

## Sheet: D
Figure 2D
Histone H3
Control	RU	Rapa	Rapa+RU
1	7.15916	8.10423	7.28678
1.31551	4.6082	6.29663	7.55422
1.09338	6.29444	5.20875	5.98407
1.51232	3.79874	6.07591	8.00644
Df Sum Sq Mean Sq F value Pr(>F)
RU 1 25.21 25.21 21.73 0.00055 ***
Rapamycin 1 48.08 48.08 41.43 3.22e-05 ***
RU:Rapamycin 1 11.89 11.89 10.25 0.00762 **
Residuals 12 13.93 1.16
---
Signif. codes: 0 ‘***’ 0.001 ‘**’ 0.01 ‘*’ 0.05 ‘.’ 0.1 ‘ ’ 1
Tukey multiple comparisons of means
95% family-wise confidence level
Fit: aov(formula = Intensity ~ RU * Rapamycin, data = ANOVA_test_H3)
$RU
diff lwr upr p adj
RU-Control 2.510666 1.337078 3.684254 0.0005498
$Rapamycin
diff lwr upr p adj
Rapamycin-Control 3.466907 2.293319 4.640495 3.22e-05
$`RU:Rapamycin`
diff lwr upr p adj
RU:Control-Control:Control 4.2348327 1.9732807 6.496385 0.0006188
Control:Rapamycin-Control:Control 5.1910739 2.9295220 7.452626 0.0000953
RU:Rapamycin-Control:Control 5.9775731 3.7160212 8.239125 0.0000237
Control:Rapamycin-RU:Control 0.9562413 -1.3053107 3.217793 0.6060517
RU:Rapamycin-RU:Control 1.7427405 -0.5188114 4.004292 0.1555077
RU:Rapamycin-Control:Rapamycin 0.7864992 -1.4750527 3.048051 0.7343837
Histone H4
Control	RU	Rapa	Rapa+RU
1	2.23113	2.95694	2.87253
1.29034	2.62049	2.45141	2.51306
0.928807	1.76855	2.87955	2.39097
1.62935	1.80045	3.36092	2.66815
Df Sum Sq Mean Sq F value Pr(>F)
RU 1 0.350 0.350 3.14 0.10177
Rapamycin 1 4.867 4.867 43.60 2.53e-05 ***
RU:Rapamycin 1 1.426 1.426 12.77 0.00382 **
Residuals 12 1.339 0.112
---
Signif. codes: 0 ‘***’ 0.001 ‘**’ 0.01 ‘*’ 0.05 ‘.’ 0.1 ‘ ’ 1
Tukey multiple comparisons of means
95% family-wise confidence level
Fit: aov(formula = Intensity ~ RU * Rapamycin, data = ANOVA_test_H4)
$RU
diff lwr upr p adj
RU-Control 0.296002 -0.0679677 0.6599717 0.1017708
$Rapamycin
diff lwr upr p adj
Rapamycin-Control 1.103052 0.7390826 1.467022 2.53e-05
$`RU:Rapamycin`
diff lwr upr p adj
RU:Control-Control:Control 0.8930294 0.1916451 1.5944138 0.0121192
Control:Rapamycin-Control:Control 1.7000797 0.9986954 2.4014640 0.0000561
RU:Rapamycin-Control:Control 1.3990543 0.6976700 2.1004386 0.0003530
Control:Rapamycin-RU:Control 0.8070503 0.1056659 1.5084346 0.0229285
RU:Rapamycin-RU:Control 0.5060249 -0.1953595 1.2074092 0.1950442
RU:Rapamycin-Control:Rapamycin -0.3010254 -1.0024097 0.4003589 0.5950415
