# Supplementary material for: A TORC1-histone axis regulates chromatin organisation and non-canonical induction of autophagy to ameliorate ageing
Source: eLife. 2021 May 14;10:e62233. doi: 10.7554/eLife.62233 (PMC8186904; doi:10.7554/eLife.62233)
Supplement: Figure 3—figure supplement 1—source data 1. [file elife-62233-fig3-figsupp1-data1.xlsx]

## Sheet: B
Figure 3-Figure supplement 1B
		total (mono+di+tri)			mono			di			tri
Control	1'	0.587	0.73	0.657	0.306	0.399	0.346	0.177	0.216	0.169	0.104	0.115	0.142
	2'	0.698	0.771	0.672	0.392	0.463	0.405	0.201	0.205	0.172	0.105	0.103	0.095
	5'	0.54	0.673	0.634	0.356	0.486	0.437	0.133	0.137	0.142	0.051	0.05	0.055
	10'	0.574	0.611	0.649	0.395	0.472	0.482	0.123	0.109	0.136	0.056	0.03	0.031
RU	1'	1.071	1.086	0.838	0.499	0.589	0.379	0.354	0.334	0.24	0.218	0.163	0.219
	2'	1.163	1.134	1.004	0.648	0.651	0.55	0.337	0.385	0.279	0.178	0.098	0.175
	5'	1.222	0.831	1.168	0.769	0.505	0.793	0.325	0.285	0.266	0.128	0.041	0.109
	10'	1.158	0.933	1.082	0.799	0.672	0.793	0.265	0.223	0.218	0.094	0.038	0.071
Rapa	1'	0.953	1.269	0.833	0.425	0.723	0.417	0.317	0.344	0.209	0.211	0.202	0.207
	2'	1.117	1.255	0.961	0.578	0.783	0.529	0.343	0.353	0.244	0.196	0.119	0.188
	5'	1.204	1.142	1.094	0.663	0.819	0.758	0.327	0.271	0.222	0.214	0.052	0.114
	10'	0.998	1.061	0.94	0.686	0.873	0.725	0.224	0.166	0.16	0.088	0.022	0.055
Rapa+RU	1'	1.161	1.003	0.777	0.569	0.56	0.364	0.368	0.291	0.243	0.224	0.152	0.17
	2'	1.125	0.982	0.926	0.649	0.588	0.501	0.326	0.304	0.274	0.15	0.09	0.151
	5'	1.102	0.991	0.985	0.755	0.698	0.626	0.261	0.23	0.271	0.086	0.063	0.088
	10'	1.117	0.887	0.867	0.862	0.709	0.649	0.194	0.144	0.171	0.061	0.034	0.047
Two-way ANOVA	Ordinary
Alpha	0.05
Source of Variation	% of total variation	P value	P value summary	Significant?
Interaction	1.936	0.9765	ns	No
Time	2.628	0.353	ns	No
Treatment	70.55	<0,0001	****	Yes
ANOVA table	SS	DF	MS	F (DFn, DFd)	P value
Interaction	0.03872	9	0.004302	F (9, 32) = 0,2767	P=0,9765
Time	0.05256	3	0.01752	F (3, 32) = 1,127	P=0,3530
Treatment	1.411	3	0.4703	F (3, 32) = 30,24	P<0,0001
Residual	0.4976	32	0.01555
Number of missing values	0
Tukey's multiple comparisons test	Mean Diff,	95,00% CI of diff,	Significant?	Summary
RU vs. Control	0.4078	0,2699 to 0,5458	Yes	****
Rapa vs. Control	0.4193	0,2813 to 0,5572	Yes	****
Rapa+RU vs. Control	0.3439	0,206 to 0,4819	Yes	****
Rapa vs. RU	0.01142	-0,1265 to 0,1494	No	ns
Rapa+RU vs. RU	-0.06392	-0,2019 to 0,07402	No	ns
Rapa+RU vs. Rapa	-0.07533	-0,2133 to 0,0626	No	ns
Test details	Mean 1	Mean 2	Mean Diff,	SE of diff,	N1	N2	q	DF
RU vs. Control	1.058	0.6497	0.4078	0.05091	12	12	11.33	32
Rapa vs. Control	1.069	0.6497	0.4193	0.05091	12	12	11.65	32
Rapa+RU vs. Control	0.9936	0.6497	0.3439	0.05091	12	12	9.554	32
Rapa vs. RU	1.069	1.058	0.01142	0.05091	12	12	0.3171	32
Rapa+RU vs. RU	0.9936	1.058	-0.06392	0.05091	12	12	1.776	32
Rapa+RU vs. Rapa	0.9936	1.069	-0.07533	0.05091	12	12	2.093	32

## Sheet: C
Figure 3-Figure supplement 1C
Control	RU	Rapa	Rapa+RU
1.63295	1.19817	0.446913	1.40328
1.7573	1.2219	0.406142	1.0885
1.13274	1.71665	0.631952	1.44266
1.50082	1.65299	0.415145	1.10604
Data: Lmer_test
Models:
ratio.RU: ratio ~ RU + (1 | subject)
ratio.model: ratio ~ RU + Rapamycin + (1 | subject)
Df AIC BIC logLik deviance Chisq Chi Df Pr(>Chisq)
ratio.RU 4 65.262 73.897 -28.631 57.262
ratio.model 5 54.817 65.611 -22.408 44.817 12.445 1 0.0004191 ***
---
Signif. codes: 0 ‘***’ 0.001 ‘**’ 0.01 ‘*’ 0.05 ‘.’ 0.1 ‘ ’ 1
Data: Lmer_test
Models:
ratio.Rapamycin: ratio ~ Rapamycin + (1 | subject)
ratio.model: ratio ~ RU + Rapamycin + (1 | subject)
Df AIC BIC logLik deviance Chisq Chi Df Pr(>Chisq)
ratio.Rapamycin 4 58.640 67.275 -25.320 50.640
ratio.model 5 54.817 65.611 -22.408 44.817 5.8231 1 0.01582 *
---
Signif. codes: 0 ‘***’ 0.001 ‘**’ 0.01 ‘*’ 0.05 ‘.’ 0.1 ‘ ’ 1
Data: Lmer_test
Models:
ratio.model: ratio ~ RU + Rapamycin + (1 | subject)
ratio.interaction: ratio ~ RU * Rapamycin + (1 | subject)
Df AIC BIC logLik deviance Chisq Chi Df Pr(>Chisq)
ratio.model 5 54.817 65.611 -22.408 44.817
ratio.interaction 6 44.624 57.578 -16.312 32.624 12.192 1 0.0004798 ***
---
Signif. codes: 0 ‘***’ 0.001 ‘**’ 0.01 ‘*’ 0.05 ‘.’ 0.1 ‘ ’ 1
$lsmeans
RU Rapamycin lsmean SE df lower.CL upper.CL
Control Control 1.484 0.112 21 1.251 1.716
RU Control 1.463 0.112 21 1.231 1.696
Control Rapamycin 0.475 0.111 21 0.244 0.706
RU Rapamycin 1.260 0.111 21 1.029 1.491
Degrees-of-freedom method: kenward-roger
Confidence level used: 0.95
$contrasts
contrast estimate SE df t.ratio p.value
Control,Control - RU,Control 0.0208 0.158 21 0.131 0.9992
Control,Control - Control,Rapamycin 1.0088 0.158 21 6.396 <.0001
Control,Control - RU,Rapamycin 0.2237 0.158 21 1.419 0.5022
RU,Control - Control,Rapamycin 0.9881 0.158 21 6.265 <.0001
RU,Control - RU,Rapamycin 0.2030 0.158 21 1.287 0.5809
Control,Rapamycin - RU,Rapamycin -0.7851 0.157 21 -4.991 0.0003
P value adjustment: tukey method for comparing a family of 4 estimates

## Sheet: D
Figure 3-Figure supplement 1D
Control	RU	Rapa	Rapa+RU
1.38789	1.93095	0.406732	1.51777
1.85155	1.56439	0.377667	1.04046
1.22966	1.64665	0.336481	1.3093
1.11854	1.29982	0.413614	1.44104
Data: Lmer_test
Models:
ratio.RU: ratio ~ RU + (1 | subject)
ratio.model: ratio ~ RU + Rapamycin + (1 | subject)
Df AIC BIC logLik deviance Chisq Chi Df Pr(>Chisq)
ratio.RU 4 25.097 33.67 -8.5486 17.097
ratio.model 5 13.034 23.75 -1.5170 3.034 14.063 1 0.0001768 ***
---
Signif. codes: 0 ‘***’ 0.001 ‘**’ 0.01 ‘*’ 0.05 ‘.’ 0.1 ‘ ’ 1
Data: Lmer_test
Models:
ratio.Rapamycin: ratio ~ Rapamycin + (1 | subject)
ratio.model: ratio ~ RU + Rapamycin + (1 | subject)
Df AIC BIC logLik deviance Chisq Chi Df Pr(>Chisq)
ratio.Rapamycin 4 23.184 31.757 -7.5922 15.184
ratio.model 5 13.034 23.750 -1.5170 3.034 12.15 1 0.0004908 ***
---
Signif. codes: 0 ‘***’ 0.001 ‘**’ 0.01 ‘*’ 0.05 ‘.’ 0.1 ‘ ’ 1
Data: Lmer_test
Models:
ratio.model: ratio ~ RU + Rapamycin + (1 | subject)
ratio.interaction: ratio ~ RU * Rapamycin + (1 | subject)
Df AIC BIC logLik deviance Chisq Chi Df Pr(>Chisq)
ratio.model 5 13.0340 23.750 -1.5170 3.0340
ratio.interaction 6 5.1433 18.002 3.4283 -6.8567 9.8907 1 0.001661 **
---
Signif. codes: 0 ‘***’ 0.001 ‘**’ 0.01 ‘*’ 0.05 ‘.’ 0.1 ‘ ’ 1
$lsmeans
RU Rapamycin lsmean SE df lower.CL upper.CL
Control Control 1.388 0.115 21.7 1.150 1.626
RU Control 1.601 0.115 22.0 1.362 1.841
Control Rapamycin 0.384 0.114 21.5 0.146 0.621
RU Rapamycin 1.337 0.115 21.7 1.098 1.575
Degrees-of-freedom method: kenward-roger
Confidence level used: 0.95
$contrasts
contrast estimate SE df t.ratio p.value
Control,Control - RU,Control -0.2134 0.163 21.9 -1.311 0.5658
Control,Control - Control,Rapamycin 1.0043 0.162 21.6 6.202 <.0001
Control,Control - RU,Rapamycin 0.0513 0.162 21.7 0.316 0.9888
RU,Control - Control,Rapamycin 1.2177 0.162 21.7 7.502 <.0001
RU,Control - RU,Rapamycin 0.2647 0.163 21.9 1.627 0.3851
Control,Rapamycin - RU,Rapamycin -0.9530 0.162 21.6 -5.885 <.0001
P value adjustment: tukey method for comparing a family of 4 estimates

## Sheet: E
Figure 3-Figure supplement 1E
Amount of HP1/cell
Control	RU	Rapa	Rapa+RU
0.900009	1.10334	0.840245	0.89321
0.865033	0.930102	0.802999	1.0572
1.0299	0.984169	0.972105	0.927238
1.20506	0.848606	0.844043	1.02715
Amount of HP1 expansion/cell
Control	RU	Rapa	Rapa+RU
0.23386	0.243804	0.523732	0.248293
0.237617	0.202045	0.475547	0.253899
0.317464	0.291066	0.416544	0.297553
0.250572	0.259516	0.333782	0.348396
Data: Lmer_test
Models:
ratio.RU: ratio ~ RU + (1 | subject)
ratio.model: ratio ~ RU + Rapamycin + (1 | subject)
Df AIC BIC logLik deviance Chisq Chi Df Pr(>Chisq)
ratio.RU 4 -129.31 -119.78 68.656 -137.31
ratio.model 5 -137.14 -125.23 73.570 -147.14 9.8271 1 0.00172 **
---
Signif. codes: 0 ‘***’ 0.001 ‘**’ 0.01 ‘*’ 0.05 ‘.’ 0.1 ‘ ’ 1
Data: Lmer_test
Models:
ratio.Rapamycin: ratio ~ Rapamycin + (1 | subject)
ratio.model: ratio ~ RU + Rapamycin + (1 | subject)
Df AIC BIC logLik deviance Chisq Chi Df Pr(>Chisq)
ratio.Rapamycin 4 -132.93 -123.40 70.464 -140.93
ratio.model 5 -137.14 -125.23 73.570 -147.14 6.2123 1 0.01269 *
---
Signif. codes: 0 ‘***’ 0.001 ‘**’ 0.01 ‘*’ 0.05 ‘.’ 0.1 ‘ ’ 1
Data: Lmer_test
Models:
ratio.model: ratio ~ RU + Rapamycin + (1 | subject)
ratio.interaction: ratio ~ RU * Rapamycin + (1 | subject)
Df AIC BIC logLik deviance Chisq Chi Df Pr(>Chisq)
ratio.model 5 -137.14 -125.23 73.570 -147.14
ratio.interaction 6 -142.18 -127.89 77.091 -154.18 7.0425 1 0.00796 **
---
Signif. codes: 0 ‘***’ 0.001 ‘**’ 0.01 ‘*’ 0.05 ‘.’ 0.1 ‘ ’ 1
$lsmeans
RU Rapamycin lsmean SE df lower.CL upper.CL
Control Control 0.260 0.0271 21.3 0.204 0.316
RU Control 0.249 0.0271 21.3 0.193 0.305
Control Rapamycin 0.437 0.0271 21.3 0.381 0.494
RU Rapamycin 0.287 0.0271 21.3 0.231 0.343
Degrees-of-freedom method: kenward-roger
Confidence level used: 0.95
$contrasts
contrast estimate SE df t.ratio p.value
Control,Control - RU,Control 0.0108 0.0383 21.3 0.281 0.9920
Control,Control - Control,Rapamycin -0.1775 0.0383 21.3 -4.633 0.0007
Control,Control - RU,Rapamycin -0.0272 0.0383 21.3 -0.709 0.8925
RU,Control - Control,Rapamycin -0.1883 0.0383 21.3 -4.914 0.0004
RU,Control - RU,Rapamycin -0.0379 0.0383 21.3 -0.990 0.7567
Control,Rapamycin - RU,Rapamycin 0.1504 0.0383 21.3 3.924 0.0039
P value adjustment: tukey method for comparing a family of 4 estimates

## Sheet: F
Figure 3-Figure supplement 1F
Amount of HP1/cell
Control	RU	Rapa	Rapa+RU
0.592214	0.873206	0.930384	0.831914
1.29375	1.10472	0.841736	0.819885
0.867414	1.26328	1.41607	0.960342
1.24662	1.14568	1.04254	1.0965
Amount of HP1 expansion/cell
Control	RU	Rapa	Rapa+RU
0.15474	0.314138	0.410663	0.216376
0.324939	0.234452	0.409796	0.325584
0.33626	0.22945	0.398346	0.276345
0.277793	0.276458	0.402377	0.345063
Data: Lmer_test
Models:
ratio.RU: ratio ~ RU + (1 | subject)
ratio.model: ratio ~ RU + Rapamycin + (1 | subject)
Df AIC BIC logLik deviance Chisq Chi Df Pr(>Chisq)
ratio.RU 4 -155.41 -145.88 81.706 -163.41
ratio.model 5 -160.38 -148.47 85.188 -170.38 6.9643 1 0.008315 **
---
Signif. codes: 0 ‘***’ 0.001 ‘**’ 0.01 ‘*’ 0.05 ‘.’ 0.1 ‘ ’ 1
Data: Lmer_test
Models:
ratio.Rapamycin: ratio ~ Rapamycin + (1 | subject)
ratio.model: ratio ~ RU + Rapamycin + (1 | subject)
Df AIC BIC logLik deviance Chisq Chi Df Pr(>Chisq)
ratio.Rapamycin 4 -157.78 -148.25 82.890 -165.78
ratio.model 5 -160.38 -148.47 85.188 -170.38 4.5962 1 0.03204 *
---
Signif. codes: 0 ‘***’ 0.001 ‘**’ 0.01 ‘*’ 0.05 ‘.’ 0.1 ‘ ’ 1
Data: Lmer_test
Models:
ratio.model: ratio ~ RU + Rapamycin + (1 | subject)
ratio.interaction: ratio ~ RU * Rapamycin + (1 | subject)
Df AIC BIC logLik deviance Chisq Chi Df Pr(>Chisq)
ratio.model 5 -160.38 -148.47 85.188 -170.38
ratio.interaction 6 -162.68 -148.39 87.342 -174.68 4.307 1 0.03796 *
---
Signif. codes: 0 ‘***’ 0.001 ‘**’ 0.01 ‘*’ 0.05 ‘.’ 0.1 ‘ ’ 1
$lsmeans
RU Rapamycin lsmean SE df lower.CL upper.CL
Control Control 0.273 0.0272 21.3 0.217 0.330
RU Control 0.264 0.0272 21.3 0.207 0.320
Control Rapamycin 0.405 0.0272 21.3 0.349 0.462
RU Rapamycin 0.291 0.0272 21.3 0.234 0.347
Degrees-of-freedom method: kenward-roger
Confidence level used: 0.95
$contrasts
contrast estimate SE df t.ratio p.value
Control,Control - RU,Control 0.00981 0.0384 21.3 0.255 0.9940
Control,Control - Control,Rapamycin -0.13186 0.0384 21.3 -3.431 0.0122
Control,Control - RU,Rapamycin -0.01741 0.0384 21.3 -0.453 0.9683
RU,Control - Control,Rapamycin -0.14167 0.0384 21.3 -3.686 0.0068
RU,Control - RU,Rapamycin -0.02722 0.0384 21.3 -0.708 0.8927
Control,Rapamycin - RU,Rapamycin 0.11445 0.0384 21.3 2.978 0.0332
P value adjustment: tukey method for comparing a family of 4 estimates
