# Supplementary material for: A TORC1-histone axis regulates chromatin organisation and non-canonical induction of autophagy to ameliorate ageing
Source: eLife. 2021 May 14;10:e62233. doi: 10.7554/eLife.62233 (PMC8186904; doi:10.7554/eLife.62233)
Supplement: Figure 3—source data 1. [file elife-62233-fig3-data1.xlsx]

## Sheet: A
Figure 3A
D10 Control	D10 Rapa	D40 Control	D40 Rapa
1.45284	0.702317	1.14019	0.523656
1.78219	0.52605	1.38418	0.405821
1.77587	0.593452	1.60992	0.582942
1.58022	0.59851	1.40445	0.50936
Data: Lmer_test
Models:
ratio.Age: ratio ~ Age + (1 | subject)
ratio.model: ratio ~ Age + Rapamycin + (1 | subject)
Df AIC BIC logLik deviance Chisq Chi Df Pr(>Chisq)
ratio.Age 4 60.325 69.803 -26.1626 52.325
ratio.model 5 18.299 30.147 -4.1497 8.299 44.026 1 3.241e-11 ***
---
Signif. codes: 0 ‘***’ 0.001 ‘**’ 0.01 ‘*’ 0.05 ‘.’ 0.1 ‘ ’ 1
Data: Lmer_test
Models:
ratio.Rapamycin: ratio ~ Rapamycin + (1 | subject)
ratio.model: ratio ~ Age + Rapamycin + (1 | subject)
Df AIC BIC logLik deviance Chisq Chi Df Pr(>Chisq)
ratio.Rapamycin 4 22.854 32.332 -7.4271 14.8542
ratio.model 5 18.299 30.147 -4.1497 8.2994 6.5548 1 0.01046 *
---
Signif. codes: 0 ‘***’ 0.001 ‘**’ 0.01 ‘*’ 0.05 ‘.’ 0.1 ‘ ’ 1
Data: Lmer_test
Models:
ratio.model: ratio ~ Age + Rapamycin + (1 | subject)
ratio.interaction: ratio ~ Age * Rapamycin + (1 | subject)
Df AIC BIC logLik deviance Chisq Chi Df Pr(>Chisq)
ratio.model 5 18.299 30.147 -4.1497 8.2994
ratio.interaction 6 18.270 32.487 -3.1351 6.2702 2.0293 1 0.1543
$lsmeans
Age Rapamycin lsmean SE df lower.CL upper.CL
10 Control 1.651 0.0690 21.9 1.508 1.794
40 Control 1.385 0.0677 21.0 1.244 1.525
10 Rapamycin 0.597 0.0680 20.9 0.456 0.738
40 Rapamycin 0.505 0.0677 21.0 0.365 0.646
Degrees-of-freedom method: kenward-roger
Confidence level used: 0.95
$contrasts
contrast estimate SE df t.ratio p.value
10,Control - 40,Control 0.2664 0.0967 21.5 2.755 0.0529
10,Control - 10,Rapamycin 1.0540 0.0969 21.4 10.881 <.0001
10,Control - 40,Rapamycin 1.1456 0.0967 21.5 11.850 <.0001
40,Control - 10,Rapamycin 0.7876 0.0959 20.9 8.210 <.0001
40,Control - 40,Rapamycin 0.8792 0.0957 21.0 9.183 <.0001
10,Rapamycin - 40,Rapamycin 0.0916 0.0959 20.9 0.955 0.7758
P value adjustment: tukey method for comparing a family of 4 estimates

## Sheet: B
Figure 3B
Control	RU	Rapa	Rapa+RU
1.5451	0.709841	0.593956	0.705104
1.52254	0.583318	0.536578	0.665462
1.28	0.618297	0.747333	0.669473
1.33444	0.854664	0.742021	0.514542
Data: Lmer_test
Models:
ratio.RU: ratio ~ RU + (1 | subject)
ratio.model: ratio ~ RU + Rapamycin + (1 | subject)
Df AIC BIC logLik deviance Chisq Chi Df Pr(>Chisq)
ratio.RU 4 -3.3051 5.3305 5.6525 -11.305
ratio.model 5 -12.5101 -1.7157 11.2551 -22.510 11.205 1 0.0008157 ***
---
Signif. codes: 0 ‘***’ 0.001 ‘**’ 0.01 ‘*’ 0.05 ‘.’ 0.1 ‘ ’ 1
Data: Lmer_test
Models:
ratio.Rapamycin: ratio ~ Rapamycin + (1 | subject)
ratio.model: ratio ~ RU + Rapamycin + (1 | subject)
Df AIC BIC logLik deviance Chisq Chi Df Pr(>Chisq)
ratio.Rapamycin 4 -4.7431 3.8924 6.3715 -12.743
ratio.model 5 -12.5101 -1.7157 11.2551 -22.510 9.767 1 0.001777 **
---
Signif. codes: 0 ‘***’ 0.001 ‘**’ 0.01 ‘*’ 0.05 ‘.’ 0.1 ‘ ’ 1
Data: Lmer_test
Models:
ratio.model: ratio ~ RU + Rapamycin + (1 | subject)
ratio.interaction: ratio ~ RU * Rapamycin + (1 | subject)
Df AIC BIC logLik deviance Chisq Chi Df Pr(>Chisq)
ratio.model 5 -12.510 -1.7157 11.255 -22.510
ratio.interaction 6 -33.966 -21.0123 22.983 -45.966 23.455 1 1.278e-06 ***
---
Signif. codes: 0 ‘***’ 0.001 ‘**’ 0.01 ‘*’ 0.05 ‘.’ 0.1 ‘ ’ 1
$lsmeans
RU Rapamycin lsmean SE df lower.CL upper.CL
Control Control 1.421 0.0564 21.3 1.303 1.538
RU Control 0.692 0.0564 21.3 0.574 0.809
Control Rapamycin 0.655 0.0564 21.3 0.538 0.772
RU Rapamycin 0.639 0.0564 21.3 0.522 0.756
Degrees-of-freedom method: kenward-roger
Confidence level used: 0.95
$contrasts
contrast estimate SE df t.ratio p.value
Control,Control - RU,Control 0.7290 0.0797 21.3 9.147 <.0001
Control,Control - Control,Rapamycin 0.7655 0.0797 21.3 9.606 <.0001
Control,Control - RU,Rapamycin 0.7819 0.0797 21.3 9.811 <.0001
RU,Control - Control,Rapamycin 0.0366 0.0797 21.3 0.459 0.9672
RU,Control - RU,Rapamycin 0.0529 0.0797 21.3 0.664 0.9096
Control,Rapamycin - RU,Rapamycin 0.0163 0.0797 21.3 0.205 0.9969
P value adjustment: tukey method for comparing a family of 4 estimates

## Sheet: C
Figure 3C
Amount of HP1/cell
Control	RU	Rapa	Rapa+RU
0.990751	1.29666	1.25769	0.876841
0.826477	1.04844	1.05828	1.08691
1.17233	1.05966	1.09291	0.84004
1.01044	1.10379	1.12659	1.319
Amount of HP1 expansion/cell
Control	RU	Rapa	Rapa+RU
0.237427	0.385865	0.468188	0.422869
0.249671	0.444217	0.483234	0.558818
0.32788	0.447868	0.502271	0.44604
0.2475	0.49242	0.467111	0.444318
Data: Lmer_test
Models:
ratio.RU: ratio ~ RU + (1 | subject)
ratio.model: ratio ~ RU + Rapamycin + (1 | subject)
Df AIC BIC logLik deviance Chisq Chi Df Pr(>Chisq)
ratio.RU 4 -136.21 -126.68 72.103 -144.21
ratio.model 5 -145.12 -133.21 77.559 -155.12 10.912 1 0.0009555 ***
---
Signif. codes: 0 ‘***’ 0.001 ‘**’ 0.01 ‘*’ 0.05 ‘.’ 0.1 ‘ ’ 1
Data: Lmer_test
Models:
ratio.Rapamycin: ratio ~ Rapamycin + (1 | subject)
ratio.model: ratio ~ RU + Rapamycin + (1 | subject)
Df AIC BIC logLik deviance Chisq Chi Df Pr(>Chisq)
ratio.Rapamycin 4 -141.05 -131.52 74.526 -149.05
ratio.model 5 -145.12 -133.21 77.559 -155.12 6.0654 1 0.01379 *
---
Signif. codes: 0 ‘***’ 0.001 ‘**’ 0.01 ‘*’ 0.05 ‘.’ 0.1 ‘ ’ 1
Data: Lmer_test
Models:
ratio.model: ratio ~ RU + Rapamycin + (1 | subject)
ratio.interaction: ratio ~ RU * Rapamycin + (1 | subject)
Df AIC BIC logLik deviance Chisq Chi Df Pr(>Chisq)
ratio.model 5 -145.12 -133.21 77.559 -155.12
ratio.interaction 6 -158.08 -143.79 85.039 -170.08 14.961 1 0.0001098 ***
---
Signif. codes: 0 ‘***’ 0.001 ‘**’ 0.01 ‘*’ 0.05 ‘.’ 0.1 ‘ ’ 1
$lsmeans
RU Rapamycin lsmean SE df lower.CL upper.CL
Control Control 0.266 0.0219 21.3 0.220 0.311
RU Control 0.443 0.0219 21.3 0.397 0.488
Control Rapamycin 0.480 0.0219 21.3 0.435 0.526
RU Rapamycin 0.468 0.0219 21.3 0.422 0.514
Degrees-of-freedom method: kenward-roger
Confidence level used: 0.95
$contrasts
contrast estimate SE df t.ratio p.value
Control,Control - RU,Control -0.1770 0.031 21.3 -5.701 0.0001
Control,Control - Control,Rapamycin -0.2146 0.031 21.3 -6.913 <.0001
Control,Control - RU,Rapamycin -0.2024 0.031 21.3 -6.520 <.0001
RU,Control - Control,Rapamycin -0.0376 0.031 21.3 -1.212 0.6265
RU,Control - RU,Rapamycin -0.0254 0.031 21.3 -0.819 0.8449
Control,Rapamycin - RU,Rapamycin 0.0122 0.031 21.3 0.393 0.9789
P value adjustment: tukey method for comparing a family of 4 estimates
