# Supplementary material for: A TORC1-histone axis regulates chromatin organisation and non-canonical induction of autophagy to ameliorate ageing
Source: eLife. 2021 May 14;10:e62233. doi: 10.7554/eLife.62233 (PMC8186904; doi:10.7554/eLife.62233)
Supplement: Figure 4—source data 1. [file elife-62233-fig4-data1.xlsx]

## Sheet: A
Figure 4A
Days	5966GSxHis3i Control	5966GSxHis3i Rapa	5966GSxHis3i RU	5966GSxHis3i Ra+RU
0	1	1	1	1
3	1	1	1	1
6	1	1	1	1
8	1	1	1	1
10	1	1	1	1
13	1	1	1	1
15	1	1	1	0.99495
17	1	1	1	0.99495
19	1	1	1	0.99495
22	1	1	1	0.99495
24	1	1	1	0.99495
27	0.994924	1	0.99495	0.989899
29	0.989848	1	0.99495	0.989899
31	0.984772	1	0.99495	0.989899
34	0.984772	1	0.989899	0.989899
36	0.979695	1	0.989899	0.989899
38	0.974619	1	0.989899	0.989899
41	0.974619	1	0.989899	0.984849
43	0.969517	1	0.989899	0.979772
45	0.964414	0.994845	0.989899	0.974695
48	0.959311	0.984482	0.984796	0.969619
50	0.944003	0.984482	0.979694	0.969619
52	0.9389	0.968688	0.979694	0.964542
55	0.892976	0.94763	0.959283	0.93916
57	0.847051	0.931836	0.928668	0.913777
59	0.801127	0.910778	0.857232	0.888394
62	0.668456	0.873926	0.755181	0.756404
64	0.601611	0.826544	0.673539	0.690409
66	0.514197	0.763369	0.576591	0.51273
69	0.380506	0.6844	0.413308	0.304592
71	0.251957	0.621224	0.301052	0.243674
73	0.185111	0.426434	0.204103	0.162449
76	0.113123	0.221114	0.112257	0.0710715
78	0.0874135	0.105292	0.0816411	0.0406123
80	0.0514197	0.0579107	0.0510257	0.0304592
83	0.0257098	0.0263231	0.035718	0.0203061
85	0.0102839	0.0210584	0.0153077	0.0203061
87	0.0102839	0.0105292	0.00510257	0.0101531
90	0	0.00526461	0.00510257	0
92		0.00526461	0
94		0

## Sheet: B
Figure 4B
Days	5966GSxHis4i Control	5966GSxHis4i Rapa	5966GSxHis4i RU	5966GSxHis4i Ra+RU
0	1	1	1	1
2	1	1	1	1
5	1	1	1	1
7	1	1	1	1
9	1	0.994975	1	1
12	1	0.994975	1	1
14	1	0.994975	1	1
16	1	0.98995	1	1
19	1	0.98995	1	1
21	1	0.98995	1	1
23	1	0.98995	1	0.984772
26	0.994924	0.98995	1	0.979695
28	0.989848	0.98995	0.995	0.979695
30	0.984772	0.98995	0.985	0.979695
33	0.974619	0.98995	0.98	0.979695
35	0.964467	0.98995	0.955	0.969543
37	0.964467	0.979848	0.955	0.949239
40	0.944055	0.969747	0.95	0.944162
42	0.944055	0.954594	0.945	0.93401
44	0.928746	0.944493	0.93	0.918782
47	0.908334	0.939442	0.895	0.913706
49	0.877543	0.929286	0.875	0.883249
51	0.84162	0.91913	0.845	0.862944
54	0.810829	0.903896	0.82	0.84264
56	0.795434	0.883583	0.785	0.817259
57.875	0.764643	0.868349	0.755	0.771574
60	0.718456	0.837881	0.7	0.725888
61.9375	0.682533	0.807412	0.655	0.690355
63.9375	0.595292	0.797256	0.57	0.64467
65.875	0.492656	0.776682	0.5	0.568528
68	0.374624	0.704672	0.37	0.472081
70.25	0.236064	0.612087	0.315	0.365482
72	0.138559	0.488641	0.21	0.253807
75	0.0769775	0.226318	0.13	0.147208
77	0.0667138	0.12859	0.06	0.0659898
79	0.030791	0.102872	0.03	0.0304569
82	0.0205273	0.0411487	0.01	0.0152284
83.9375	0.0153955	0.0308615	0.005	0.00507614
86.2083	0.00513183	0.0154308	0	0
89	0	0.00514359	0	0
91	0	0	0

## Sheet: C
Figure 4C
Days	5966GSxHis3/4OE Control	5966GSxHis3/4OE Rapa	5966GSxHis3/4OE RU	5966GSxHis3/4OE Ra+RU
0	1	1	1	1
2	1	1	1	1
5	1	1	1	1
7	0.994975	1	1	1
9	0.994975	1	1	1
12	0.994975	1	1	1
14	0.994975	1	1	1
16	0.994975	1	1	1
19	0.989898	1	1	1
21	0.984822	0.994924	1	0.994845
23	0.984822	0.994924	0.99495	0.989691
26	0.979719	0.994924	0.989899	0.984536
28	0.974617	0.994924	0.989899	0.979381
30	0.974617	0.994924	0.989899	0.974227
33	0.974617	0.994924	0.989899	0.969072
35	0.969487	0.984719	0.984823	0.969072
37	0.964358	0.979617	0.984823	0.958652
40	0.943839	0.979617	0.979746	0.948232
42	0.943839	0.969413	0.969593	0.937812
44	0.93871	0.964311	0.964517	0.937812
47	0.913062	0.954106	0.949288	0.932602
49	0.897673	0.9388	0.934059	0.932602
51	0.877155	0.933698	0.923906	0.922123
54	0.846013	0.923493	0.9036	0.906405
56	0.814872	0.923493	0.883294	0.885448
58	0.799301	0.918391	0.873142	0.880208
60	0.77854	0.913289	0.857912	0.874969
61.9167	0.742208	0.908187	0.842593	0.874969
63.9167	0.705876	0.89288	0.822042	0.859251
65.8958	0.664354	0.872472	0.791215	0.833054
68.1667	0.58131	0.846961	0.728337	0.801419
70.2917	0.487885	0.790837	0.63926	0.748694
72	0.425602	0.75002	0.576382	0.69597
75.2083	0.301692	0.571693	0.455866	0.552525
77	0.210107	0.435326	0.345829	0.456896
79	0.161621	0.335673	0.293431	0.32939
82	0.113135	0.209796	0.193874	0.170008
83.9583	0.0861978	0.141612	0.130996	0.100942
86.2292	0.0538737	0.0576938	0.0733577	0.0584402
89	0.0161621	0.0209796	0.0261992	0.0318765
91	0.00538736	0	0.0104797	0.0159382
93	0	0	0.00523983	0.00531274
95	0	0	0	0

## Sheet: D
Figure 4D
Control	RU	Rapa	Rapa+RU
11	31	3	10
14	42	0	20
8	20	5	12
13	36	7	11
44	11	5	17
7	46	1	16
14	12	3	16
11	25	9	11
24	32	3	24
34	27	6	16
6	9	5	2
11	25	5	2
15	36	0	27
4	13	1	4
14	23	0	1
14	16	0	2
15	14	0	1
11	15	6	0
14	30	3	5
13	25	0	8
5	35	0	10
5	29	0	7
16	34	1	12
17	18	1	14
19		5
Df Sum Sq Mean Sq F value Pr(>F)
RU 1 2068 2068 33.62 8.93e-08 ***
Rapamycin 1 4258 4258 69.22 6.79e-13 ***
RU:Rapamycin 1 64 64 1.04 0.31
Residuals 94 5783 62
---
Signif. codes: 0 ‘***’ 0.001 ‘**’ 0.01 ‘*’ 0.05 ‘.’ 0.1 ‘ ’ 1
Tukey multiple comparisons of means
95% family-wise confidence level
Fit: aov(formula = pH3 ~ RU * Rapamycin, data = ANOVA_test_5966GShis3i)
$RU
diff lwr upr p adj
RU-Control 9.19 6.043015 12.33698 1e-07
$Rapamycin
diff lwr upr p adj
Rapamycin-Control -13.18367 -16.33 -10.03734 0
$`RU:Rapamycin`
diff lwr upr p adj
RU:Control-Control:Control 10.806667 4.943880 16.669454 0.0000322
Control:Rapamycin-Control:Control -11.600000 -17.402654 -5.797346 0.0000061
RU:Rapamycin-Control:Control -4.026667 -9.889454 1.836120 0.2815150
Control:Rapamycin-RU:Control -22.406667 -28.269454 -16.543880 0.0000000
RU:Rapamycin-RU:Control -14.833333 -20.755643 -8.911024 0.0000000
RU:Rapamycin-Control:Rapamycin 7.573333 1.710546 13.436120 0.0057573

## Sheet: E
Figure 4E
Control	RU	Rapa	Rapa+RU
40	11	2	21
13	54	1	28
17	15	7	19
22	39	6	32
54	10	2	12
22	11	5	15
18	15	1	18
3	38	4	14
20	73	2	18
14	21	2	23
4	27	1	1
24	7	2	21
8	10	2	1
1	2	2	19
24	15	6	6
28	8	0	3
10	13	3	2
13	30	0	1
8	17	4	7
18	16	0	7
8	14	3	10
11	3	2	8
23	14	4	14
7	7		0
22	30
Df Sum Sq Mean Sq F value Pr(>F)
RU 1 889 889.2 6.947 0.00984 **
Rapamycin 1 2944 2944.4 23.002 6.13e-06 ***
RU:Rapamycin 1 308 307.6 2.403 0.12447
Residuals 93 11904 128.0
---
Signif. codes: 0 ‘***’ 0.001 ‘**’ 0.01 ‘*’ 0.05 ‘.’ 0.1 ‘ ’ 1
Tukey multiple comparisons of means
95% family-wise confidence level
Fit: aov(formula = pH3 ~ RU * Rapamycin, data = ANOVA_test_5966GShis4i)
$RU
diff lwr upr p adj
RU-Control 6.055697 1.493093 10.6183 0.0098395
$Rapamycin
diff lwr upr p adj
Rapamycin-Control -11.02357 -15.58812 -6.459026 6.1e-06
$`RU:Rapamycin`
diff lwr upr p adj
RU:Control-Control:Control 2.720000 -5.651599 11.0915995 0.8303318
Control:Rapamycin-Control:Control -14.627826 -23.179481 -6.0761716 0.0001258
RU:Rapamycin-Control:Control -4.780000 -13.238354 3.6783541 0.4545760
Control:Rapamycin-RU:Control -17.347826 -25.899481 -8.7961716 0.0000045
RU:Rapamycin-RU:Control -7.500000 -15.958354 0.9583541 0.1009136
RU:Rapamycin-Control:Rapamycin 9.847826 1.211225 18.4844268 0.0187876

## Sheet: F
Figure 4F
Control	RU	Rapa	Rapa+RU
29	12	5	8
32	18	2	2
16	9	11	0
17	11	1	1
30	7	3	1
44	20	4	2
39	12	3	12
22	8	19	2
7	2	4	12
26	9	20	8
41	0	7	0
2	2	3	4
13	1	2	5
3	0	0	0
0	0	1	0
2	19	0	0
23	2	10	3
27	2	4	6
43	0	1	25
2	10	5	4
10	1	2	11
34	3	0	3
22	29	2	7
17	0	1
Df Sum Sq Mean Sq F value Pr(>F)
RU 1 1002 1001.8 12.36 0.000688 ***
Rapamycin 1 2092 2092.1 25.80 2e-06 ***
RU:Rapamycin 1 1157 1156.7 14.27 0.000283 ***
Residuals 91 7379 81.1
---
Signif. codes: 0 ‘***’ 0.001 ‘**’ 0.01 ‘*’ 0.05 ‘.’ 0.1 ‘ ’ 1
Tukey multiple comparisons of means
95% family-wise confidence level
Fit: aov(formula = pH3 ~ RU * Rapamycin, data = ANOVA_test_5966GShis34OE)
$RU
diff lwr upr p adj
RU-Control -6.495124 -10.16569 -2.824557 0.0006877
$Rapamycin
diff lwr upr p adj
Rapamycin-Control -9.385586 -13.05615 -5.715019 2e-06
$`RU:Rapamycin`
diff lwr upr p adj
RU:Control-Control:Control -13.5000000 -20.303250 -6.696750 0.0000074
Control:Rapamycin-Control:Control -16.2916667 -23.094916 -9.488417 0.0000001
RU:Rapamycin-Control:Control -15.8315217 -22.708322 -8.954721 0.0000002
Control:Rapamycin-RU:Control -2.7916667 -9.594916 4.011583 0.7062314
RU:Rapamycin-RU:Control -2.3315217 -9.208322 4.545279 0.8114396
RU:Rapamycin-Control:Rapamycin 0.4601449 -6.416655 7.336945 0.9980782

## Sheet: G
Figure 4G
Control	RU	Rapa	Rapa+RU
18.4	35.1	18.6	4.5
17.7	23.8	2.3	22.3
28.9	22.9	1.5	10.8
19.6	19.6	0	3.3
18.8	27.2	5.8	1.7
26.9	7.7	4.1	24.4
35.3	23.3	0	12.1
8.3	31.4	14.6	12.3
18.9	30.1	4.5	13.8
16	38.2	2.6	25.4
20.1	25.6		22.2
			8.9
Df Sum Sq Mean Sq F value Pr(>F)
RU 1 388.2 388.2 6.699 0.0134 *
Rapamycin 1 2103.4 2103.4 36.295 4.37e-07 ***
RU:Rapamycin 1 24.0 24.0 0.415 0.5231
Residuals 40 2318.1 58.0
---
Signif. codes: 0 ‘***’ 0.001 ‘**’ 0.01 ‘*’ 0.05 ‘.’ 0.1 ‘ ’ 1
Tukey multiple comparisons of means
95% family-wise confidence level
Fit: aov(formula = ratio ~ RU * Rapamycin, data = ANOVA_test_H3i)
$RU
diff lwr upr p adj
RU-Control 5.946971 1.303193 10.59075 0.0133824
$Rapamycin
diff lwr upr p adj
Rapamycin-Control -13.81377 -18.45275 -9.174793 4e-07
$`RU:Rapamycin`
diff lwr upr p adj
RU:Control-Control:Control 5.101920 -3.5988461 13.802687 0.4058955
Control:Rapamycin-Control:Control -15.391762 -24.3073950 -6.476130 0.0002183
RU:Rapamycin-Control:Control -7.326437 -15.8440090 1.191135 0.1137833
Control:Rapamycin-RU:Control -20.493683 -29.4093155 -11.578050 0.0000016
RU:Rapamycin-RU:Control -12.428357 -20.9459294 -3.910785 0.0018981
RU:Rapamycin-Control:Rapamycin 8.065325 -0.6716191 16.802270 0.0795730

## Sheet: H
Figure 4H
Control	RU	Rapa	Rapa+RU
41.8	20.8	2.6	13.5
23.9	6	6.6	4
17.9	4.4	11	18.7
13.2	23.3	3.3	0
18.7	20.7	9.5	3.6
28.1	0	8	11.9
29.2	15.7	3	13.5
19.5	8.1	3.2	0.7
20.3	4.8	0	1.8
	23.8	0	9.5
	14.5	8.4	2.5
			0
Df Sum Sq Mean Sq F value Pr(>F)
RU 1 151.7 151.7 3.093 0.08647 .
Rapamycin 1 1530.8 1530.8 31.214 1.94e-06 ***
RU:Rapamycin 1 401.2 401.2 8.181 0.00677 **
Residuals 39 1912.6 49.0
---
Signif. codes: 0 ‘***’ 0.001 ‘**’ 0.01 ‘*’ 0.05 ‘.’ 0.1 ‘ ’ 1
1 observation deleted due to missingness
Tukey multiple comparisons of means
95% family-wise confidence level
Fit: aov(formula = ratio ~ RU * Rapamycin, data = ANOVA_test_OE)
$RU
diff lwr upr p adj
RU-Control -3.765526 -8.096264 0.5652124 0.0864725
$Rapamycin
diff lwr upr p adj
Rapamycin-Control -11.95737 -16.28811 -7.626634 2e-06
$`RU:Rapamycin`
diff lwr upr p adj
RU:Control-Control:Control -10.700598 -19.146666 -2.2545294 0.0081922
Control:Rapamycin-Control:Control -18.563806 -27.009874 -10.1177374 0.0000042
RU:Rapamycin-Control:Control -16.977722 -25.263914 -8.6915303 0.0000149
Control:Rapamycin-RU:Control -7.863208 -15.875852 0.1494362 0.0561036
RU:Rapamycin-RU:Control -6.277124 -14.121062 1.5668140 0.1563199
RU:Rapamycin-Control:Rapamycin 1.586084 -6.257854 9.4300220 0.9479852
