# Supplementary material for: A TORC1-histone axis regulates chromatin organisation and non-canonical induction of autophagy to ameliorate ageing
Source: eLife. 2021 May 14;10:e62233. doi: 10.7554/eLife.62233 (PMC8186904; doi:10.7554/eLife.62233)
Supplement: Figure 5—figure supplement 1—source data 1. [file elife-62233-fig5-figsupp1-data1.xlsx]

## Sheet: C
Figure 5-Figure supplement 1C
gene_name	gene_id	XLOC	chr	transcript_id	baseMean	log2FoldChange	lfcSE	stat	pvalue	padj
128up	FBgn0010339	XLOC_003914	2R	FBtr0087976	3.9221	0.229069	0.426947	0.536527	0.591594	1
140up	FBgn0010340	XLOC_012867	3R	FBtr0337095;FBtr0082909	390.314	-0.159826	0.289176	-0.552693	0.580473	0.951252
14-3-3epsilon	FBgn0020238	XLOC_011169	3R	FBtr0083566;FBtr0083568;FBtr0083567;FBtr0083565	241.46	0.407578	0.334935	1.21689	0.223646	0.77698
14-3-3zeta	FBgn0004907	XLOC_003785	2R	FBtr0088416;FBtr0088418;FBtr0088415;FBtr0088412;FBtr0100182;FBtr0100183;FBtr0088413;FBtr0088419;FBtr0088417;FBtr0088414;FBtr0332916;FBtr0332917	345	-0.218345	0.296503	-0.736402	0.461486	0.932543
18SrRNA-Psi:CR41602	FBgn0085813	XLOC_015543	X	FBtr0346892	30.2047	0.121591	0.353351	0.34411	0.730764	1
18w	FBgn0004364	XLOC_004645	2R	FBtr0086309	10.0718	-0.0709483	0.504657	-0.140587	0.888196	1
26-29-p	FBgn0250848	XLOC_007811	3L	FBtr0075766	26.3477	-0.15696	0.484963	-0.323653	0.746201	1
28SrRNA-Psi:CR40741	FBgn0085771	XLOC_015547	X	FBtr0346896	1380.99	0.358255	0.469012	0.763851		1
28SrRNA-Psi:CR41609	FBgn0085819	XLOC_016860	X	FBtr0346904	970.539	0.590604	0.485011	1.21771	0.223334	0.776699
28SrRNA-Psi:CR45853	FBgn0267513	XLOC_015539	X	FBtr0346888	12.3772	-0.0973753	0.275417	-0.353556	0.723672	1
28SrRNA-Psi:CR45855	FBgn0267515	XLOC_015542	X	FBtr0346891	9.48608	-0.0758061	0.498655	-0.152021	0.87917	1
28SrRNA-Psi:CR45859	FBgn0267519	XLOC_015546	X	FBtr0346895	826.276	-0.0327758	0.509322	-0.0643518	0.94869	0.998087
28SrRNA-Psi:CR45860	FBgn0267520	XLOC_016861	X	FBtr0346903	21.9024	-1.08645	0.515356	-2.10816	0.0350174	1
2mit;CR45109		XLOC_012795	3R	FBtr0330143;FBtr0344730;FBtr0344729;FBtr0344731	71.4368	-0.721846	0.419152	-1.72216	0.0850411	0.553003
4EHP;Syx1A		XLOC_013544	3R	FBtr0084587;FBtr0303160;FBtr0303159;FBtr0300475;FBtr0303161;FBtr0084588	105.851	-0.216464	0.371331	-0.582942	0.559933	0.947536
4E-T	FBgn0052016	XLOC_014201	4	FBtr0334626;FBtr0310651;FBtr0089233;FBtr0089229	24.9277	0.0604744	0.481635	0.125561	0.90008	1
5.8SrRNA-Psi:CR45854	FBgn0267514	XLOC_015540	X	FBtr0346889	36.0701	-0.22041	0.264554	-0.833138		1
5.8SrRNA-Psi:CR45863	FBgn0267523	XLOC_015548	X	FBtr0346897	586.499	-0.220357	0.264902	-0.831844		1
5-HT1A	FBgn0004168	XLOC_004558	2R	FBtr0086577	4.31267	-0.364396	0.466274	-0.781505	0.434506	1
5-HT1B	FBgn0263116	XLOC_006205	2R	FBtr0330056;FBtr0330055;FBtr0086599	2.92204	0.268922	0.379923	0.707833	0.479049	1
5-HT2A	FBgn0087012	XLOC_010194	3R	FBtr0300474;FBtr0339397;FBtr0078855;FBtr0078854;FBtr0339395	8.78046	-0.229845	0.494902	-0.464425	0.642344	1
5-HT2B	FBgn0261929	XLOC_010474	3R	FBtr0330144;FBtr0339322	0.612556	0.176021	0.246291	0.714687	0.474802	1
5-HT7	FBgn0004573	XLOC_014045	3R	FBtr0334508;FBtr0085746	3.0703	-0.483442	0.35906	-1.34641	0.17817	1
5PtaseI	FBgn0259178	XLOC_013626	3R	FBtr0299662;FBtr0299660;FBtr0299661	442.508	0.0585339	0.27504	0.21282	0.831468	0.986741
5SrRNA:CR33451	FBgn0053451	XLOC_006257	2R	FBtr0086443	0.92109	-0.201544	0.250875	-0.803366	0.421763	1
7B2	FBgn0041707	XLOC_010229	3R	FBtr0301640;FBtr0078789	3.77227	-0.0541869	0.397871	-0.136192	0.891669	1
7SLRNA:CR32864	FBgn0000003	XLOC_010345	3R	FBtr0081624	1438.51	0.303563	0.495997	0.612025	0.540521	0.93939
7SLRNA:CR42652	FBgn0261504	XLOC_012320	3R	FBtr0302398	415.458	0.0286762	0.487232	0.0588553	0.953067	0.998087
825-Oak	FBgn0052208	XLOC_009862	3L	FBtr0273406	0.631692	0.177839	0.247149	0.719562	0.471795	1
a	FBgn0000008	XLOC_004821	2R	FBtr0342981;FBtr0100521;FBtr0071763;FBtr0071764	53.787	0.214356	0.408469	0.524778	0.599737	1
A16	FBgn0028965	XLOC_002745	2L	FBtr0080427	12.3816	1.0534	0.513787	2.05028	0.0403375	1
A2bp1	FBgn0052062	XLOC_007557	3L	FBtr0305097;FBtr0305093;FBtr0305094;FBtr0113419;FBtr0113418;FBtr0305096;FBtr0332985;FBtr0305095	15.6987	0.719644	0.515238	1.39672	0.162497	1
a6	FBgn0023130	XLOC_015630	X	FBtr0333116;FBtr0330407;FBtr0070279	26.7081	0.337667	0.502043	0.672586	0.501211	1
Aac11	FBgn0027885	XLOC_003028	2L	FBtr0081001	25.581	0.0609244	0.496087	0.12281	0.902258	1
Aatf	FBgn0031851	XLOC_000576	2L	FBtr0079299	12.1608	0.421946	0.513662	0.821447	0.411392	1
Aats-ala	FBgn0027094	XLOC_002413	2L	FBtr0079722;FBtr0079721	38.8351	-0.028356	0.444273	-0.0638256	0.949109	1
Aats-ala-m	FBgn0028962	XLOC_007209	3L	FBtr0077168	15.6294	-0.833691	0.512603	-1.62639	0.103867	1
Aats-arg	FBgn0027093	XLOC_016428	X	FBtr0074178	10.6405	0.172023	0.50941	0.337691	0.735596	1
Aats-asn	FBgn0086443	XLOC_003143	2L	FBtr0332578;FBtr0081162	34.4425	-0.400402	0.454702	-0.880582	0.378544	1
Aats-cys	FBgn0027091	XLOC_004251	2R	FBtr0087234	19.729	0.78054	0.514168	1.51806	0.128998	1
Aats-gln	FBgn0027090	XLOC_013644	3R	FBtr0084866	48.4414	0.574665	0.444157	1.29383	0.195723	1
Aats-glupro	FBgn0005674	XLOC_013536	3R	FBtr0084512;FBtr0084511	158.778	-1.21072	0.459845	-2.63289	0.00846609	0.189799
Aats-gly	FBgn0027088	XLOC_007862	3L	FBtr0333934;FBtr0075633;FBtr0075632	42.4649	-0.594691	0.459776	-1.29344	0.19586	1
Aats-his;Bx		XLOC_015351	X	FBtr0333805;FBtr0333806;FBtr0333804;FBtr0074593;FBtr0340363;FBtr0340364;FBtr0340366;FBtr0340365	39.3934	0.00877639	0.447522	0.0196111	0.984354	1
Aats-ile	FBgn0027086	XLOC_008403	3L	FBtr0078500;FBtr0078499;FBtr0078498	26.5829	0.070008	0.478144	0.146416	0.883593	1
Aats-leu	FBgn0027085	XLOC_007197	3L	FBtr0073348	19.4723	-0.518636	0.507827	-1.02128	0.30712	1
Aats-lys	FBgn0027084	XLOC_016080	X	FBtr0303560;FBtr0071367;FBtr0071366	34.9428	0.23695	0.447524	0.529469	0.59648	1
Aats-met	FBgn0027083	XLOC_012884	3R	FBtr0347148;FBtr0337021;FBtr0082895	3.5133	-0.355027	0.368414	-0.963664	0.335214	1
Aats-phe	FBgn0020766	XLOC_004091	2R	FBtr0087594	23.3825	0.1101	0.483809	0.22757	0.819981	1
Aats-pro	FBgn0027082	XLOC_008698	3L	FBtr0333447;FBtr0072948	856.418	0.344297	0.281389	1.22356	0.221117	0.773236
Aats-ser	FBgn0021750	XLOC_010947	3R	FBtr0334589	384.856	0.11311	0.280897	0.402676	0.687187	0.969394
Aats-thr	FBgn0027081	XLOC_001025	2L	FBtr0080332;FBtr0080331;FBtr0346436;FBtr0080333	89.5514	0.142616	0.403238	0.353676	0.723581	0.972543
Aats-trp	FBgn0010803	XLOC_012502	3R	FBtr0081981	18.6037	0.430337	0.499517	0.861505	0.38896	1
Aats-tyr	FBgn0027080	XLOC_009659	3L	FBtr0075410	10.9257	0.546744	0.511197	1.06954	0.284828	1
Aats-tyr-m	FBgn0035064	XLOC_006807	2R	FBtr0072429	64.1742	0.33561	0.416731	0.805339	0.420624	0.913587
Aats-val	FBgn0027079	XLOC_004032	2R	FBtr0333148;FBtr0087734;FBtr0087735	80.6575	0.496042	0.399036	1.2431	0.213831	0.764314
aay	FBgn0023129	XLOC_007488	3L	FBtr0076457	68.0231	0.0869208	0.378513	0.229638	0.818373	0.985388
abd-A	FBgn0000014	XLOC_013054	3R	FBtr0306337;FBtr0083388;FBtr0300485;FBtr0083387	16.4217	0.276021	0.514198	0.536799	0.591406	1
Abd-B	FBgn0000015	XLOC_013057	3R	FBtr0083385;FBtr0346764;FBtr0083384;FBtr0083383;FBtr0083382;FBtr0083381	3.77474	0.0631289	0.395381	0.159666	0.873144	1
Abi	FBgn0020510	XLOC_012866	3R	FBtr0112896;FBtr0337096;FBtr0337097;FBtr0307077;FBtr0307076;FBtr0082910	16.6824	0.369906	0.513398	0.720505	0.471214	1
Abl	FBgn0000017	XLOC_009677	3L	FBtr0345369;FBtr0112790;FBtr0330133;FBtr0330135;FBtr0330136;FBtr0330134;FBtr0330132;FBtr0330131;FBtr0330130;FBtr0075357	32.6955	-0.440067	0.486425	-0.904696	0.365626	1
abo	FBgn0000018	XLOC_002623	2L	FBtr0080168	3.66639	0.139122	0.455087	0.305703	0.759831	1
Abp1	FBgn0036372	XLOC_009472	3L	FBtr0075819	439.918	0.407811	0.377158	1.08127	0.279576	0.821977
abs	FBgn0015331	XLOC_010161	3R	FBtr0078967	6.5531	-0.347945	0.486578	-0.715085	0.474556	1
ab;snoRNA:Me18S-G642		XLOC_000958	2L	FBtr0332560;FBtr0332557;FBtr0332558;FBtr0332561;FBtr0114311;FBtr0332562	6.47901	0.251217	0.462552	0.54311	0.587054	1
ac	FBgn0000022	XLOC_014323	X	FBtr0070072	1.24425	0.269628	0.294186	0.91652	0.359394	1
Ac13E	FBgn0022710	XLOC_016398	X	FBtr0100142;FBtr0332497;FBtr0074073	177.104	-0.0469179	0.330193	-0.142092	0.887007	0.992493
Ac3	FBgn0023416	XLOC_001715	2L	FBtr0100324;FBtr0085897	280.118	0.055535	0.347379	0.159869	0.872985	0.992493
Ac76E	FBgn0004852	XLOC_008215	3L	FBtr0304746;FBtr0074897	19.5732	0.186841	0.498293	0.374962	0.707689	1
Ac78C	FBgn0024150	XLOC_010013	3L	FBtr0305501;FBtr0330066;FBtr0333358;FBtr0330067	5.10253	0.72506	0.471408	1.53807	0.124031	1
ACC	FBgn0033246	XLOC_005322	2R	FBtr0339123;FBtr0113053;FBtr0088872;FBtr0088871;FBtr0339124;FBtr0339125	153.319	0.0135648	0.345123	0.0393041	0.968648	0.998087
AcCoAS	FBgn0012034	XLOC_010021	3L	FBtr0078413;FBtr0078414;FBtr0333126	173.631	0.323177	0.315848	1.02321	0.306211	0.842954
Ace	FBgn0000024	XLOC_012799	3R	FBtr0335223;FBtr0082780;FBtr0300486	11.4316	-1.04243	0.515147	-2.02356	0.0430158	1
Acer	FBgn0016122	XLOC_000726	2L	FBtr0079685;FBtr0333416	62.6247	0.784006	0.412426	1.90096	0.0573071	0.482467
Acf1	FBgn0027620	XLOC_012117	3R	FBtr0085845	28.7855	0.164175	0.496051	0.330964	0.740671	1
achi	FBgn0033749	XLOC_005697	2R	FBtr0339635;FBtr0087943;FBtr0087942	3.75254	0.168672	0.392873	0.429331	0.667683	1
acj6	FBgn0000028	XLOC_016388	X	FBtr0305191;FBtr0100328;FBtr0305189;FBtr0305192;FBtr0305194;FBtr0305196;FBtr0305195;FBtr0305193;FBtr0305190;FBtr0290064;FBtr0290063;FBtr0100326;FBtr0074015	23.6761	-0.693037	0.47945	-1.44548	0.148322	1
Ack	FBgn0028484	XLOC_007143	3L	FBtr0073211	159.205	0.110834	0.376496	0.294382	0.768466	0.978361
Ack-like	FBgn0263998	XLOC_005740	2R	FBtr0330331;FBtr0330329;FBtr0330332;FBtr0330330	16.0984	-0.279168	0.513898	-0.543235	0.586968	1
Acn	FBgn0263198	XLOC_001461	2L	FBtr0081144;FBtr0081145;FBtr0336842	62.8566	-0.230379	0.392011	-0.587685	0.556744	0.947075
Acon	FBgn0010100	XLOC_001620	2L	FBtr0346587;FBtr0081473;FBtr0300425;FBtr0343871	183.148	0.236613	0.379168	0.624032	0.532606	0.93778
Acox57D-d	FBgn0034629	XLOC_004775	2R	FBtr0071607	142.193	-0.0843496	0.312551	-0.269875	0.787256	0.981965
Acox57D-p	FBgn0034628	XLOC_004774	2R	FBtr0071606;FBtr0342891	57.4752	-0.0532304	0.421853	-0.126182	0.899588	0.992493
Acp26Aa	FBgn0002855	XLOC_002196	2L	FBtr0079155	1.03366	0.190544	0.252882	0.753492	0.451154	1
Acp26Ab	FBgn0002856	XLOC_002195	2L	FBtr0079157;FBtr0079156;FBtr0342618	0.56801	-0.194549	0.245753	-0.791644	0.428568	1
Acp32CD	FBgn0023415	XLOC_000945	2L	FBtr0344020;FBtr0080158	32.1928	-0.853134	0.482841	-1.7669	0.0772443	1
Acp33A	FBgn0267327	XLOC_002665	2L	FBtr0080270	0.674208	-0.194293	0.245566	-0.791208	0.428823	1
Acp36DE	FBgn0011559	XLOC_003079	2L	FBtr0340581;FBtr0081054	210.647	-0.276757	0.302706	-0.914278	0.360571	0.875213
Acp53C14a	FBgn0034152	XLOC_006022	2R	FBtr0345494;FBtr0087082	230.652	0.320032	0.386268	0.828523	0.407375	0.903483
Acp53C14b	FBgn0034153	XLOC_006023	2R	FBtr0345493;FBtr0087081	0.442998	0.163596	0.24015	0.681227	0.495728	1
Acp53Ea	FBgn0015584	XLOC_006024	2R	FBtr0087080	0.631692	0.177839	0.247149	0.719562	0.471795	1
Acp54A1	FBgn0083936	XLOC_004355	2R	FBtr0110768	1.85477	-0.124849	0.338134	-0.36923	0.711956	1
Acp62F	FBgn0020509	XLOC_007034	3L	FBtr0072943	27.0539	-0.918918	0.479671	-1.91573	0.0553998	1
Acp63F	FBgn0015585	XLOC_008767	3L	FBtr0073182;FBtr0346805	51.3414	-0.0373446	0.458904	-0.0813779	0.935141	1
Acp76A	FBgn0015586	XLOC_009835	3L	FBtr0308781;FBtr0075038	3.47091	0.208348	0.449713	0.463291	0.643156	1
Acp95EF	FBgn0002863	XLOC_011563	3R	FBtr0084561	27.76	-0.0630509	0.477579	-0.132022	0.894967	1
Acp98AB	FBgn0263597	XLOC_011857	3R	FBtr0310089	7.04324	0.991851	0.457085	2.16995	0.0300106	1
Acph-1	FBgn0000032	XLOC_013953	3R	FBtr0085610;FBtr0085609	2.87031	0.0841399	0.383246	0.219546	0.826225	1
Acsl	FBgn0263120	XLOC_003647	2R	FBtr0100427;FBtr0100426;FBtr0088700;FBtr0088699;FBtr0100428;FBtr0100430;FBtr0100429;FBtr0333001;FBtr0088701;FBtr0100431	215.105	-0.0913495	0.304939	-0.299567	0.764507	0.977899
Act42A	FBgn0000043	XLOC_005164	2R	FBtr0086029	26.5096	-0.596094	0.485533	-1.22771	0.219556	1
Act57B;snoRNA:660		XLOC_004720	2R	FBtr0071519;FBtr0091781	56.2943	0.337573	0.440325	0.766646	0.443292	0.923483
Act5C	FBgn0000042	XLOC_014616	X	FBtr0070822;FBtr0100663;FBtr0100662;FBtr0345894;FBtr0070823	1308.17	-0.0584997	0.266159	-0.219792	0.826033	0.985388
Act79B	FBgn0000045	XLOC_008388	3L	FBtr0334090;FBtr0078478	2.56379	-0.0864389	0.395903	-0.218334	0.827169	1
Act87E	FBgn0000046	XLOC_010839	3R	FBtr0082785;FBtr0346242;FBtr0082786	22.9062	-0.283162	0.485782	-0.582899	0.559961	1
Act88F	FBgn0000047	XLOC_010957	3R	FBtr0083143	13.284	0.114442	0.512419	0.223337	0.823273	1
Actbeta	FBgn0024913	XLOC_014209	4	FBtr0089209	76.6802	0.501709	0.434254	1.15534	0.247952	0.805642
Actn3	FBgn0015008	XLOC_013058	3R	FBtr0083380	1.74858	-0.0960421	0.308633	-0.311185	0.75566	1
Actn;usp		XLOC_015651	X	FBtr0070345;FBtr0310657;FBtr0333802;FBtr0333801;FBtr0310658;FBtr0303048;FBtr0310659;FBtr0070344;FBtr0070343;FBtr0070346;FBtr0333803	608.083	-0.175725	0.257518	-0.682381	0.494998	0.932543
ACXC	FBgn0040508	XLOC_001058	2L	FBtr0100494;FBtr0080413	3.94158	0.108824	0.394254	0.276026	0.782528	1
ACXD	FBgn0040507	XLOC_007002	3L	FBtr0332662;FBtr0072874	42.7875	-0.422971	0.458784	-0.921941	0.35656	1
ACXE	FBgn0040506	XLOC_001061	2L	FBtr0310556	0.56801	-0.194549	0.245753	-0.791644	0.428568	1
Acyp	FBgn0025115	XLOC_001148	2L	FBtr0080555;FBtr0343668	1.01101	-0.032415	0.257769	-0.125752	0.899928	1
Acyp2	FBgn0038363	XLOC_010978	3R	FBtr0083174;FBtr0334591	21.2222	0.303757	0.501161	0.606106	0.544445	1
Ada	FBgn0037661	XLOC_010513	3R	FBtr0081971	1.87391	-0.117855	0.340121	-0.34651	0.728959	1
Ada1-1	FBgn0051865	XLOC_001008	2L	FBtr0080289;FBtr0345286	27.3306	-0.0309667	0.512527	-0.0604196	0.951821	1
Ada2a;Rpb4		XLOC_013147	3R	FBtr0310381;FBtr0310383;FBtr0310382;FBtr0310380;FBtr0310379;FBtr0310384	19.7812	0.154201	0.515082	0.299372	0.764656	1
Ada2b	FBgn0037555	XLOC_012427	3R	FBtr0334315;FBtr0100368;FBtr0081807	156.881	0.257071	0.332559	0.773007	0.439519	0.920805
Adam	FBgn0027619	XLOC_003770	2R	FBtr0088387;FBtr0339425	123.679	0.0127529	0.352138	0.0362156	0.97111	0.998087
AdamTS-A	FBgn0038341	XLOC_012971	3R	FBtr0339398;FBtr0334629;FBtr0083160	69.6144	-0.895144	0.42115	-2.12548	0.0335468	0.385559
adat	FBgn0028658	XLOC_002799	2L	FBtr0080573;FBtr0331627	19940	-0.209858	0.305969	-0.685881	0.492788	0.932543
ADD1	FBgn0026573	XLOC_003907	2R	FBtr0346629;FBtr0088041;FBtr0088042	24.1171	-0.0437111	0.486386	-0.0898691	0.928391	1
ade2	FBgn0000052	XLOC_002220	2L	FBtr0079221;FBtr0079219;FBtr0079220	40.6758	0.896129	0.44122	2.03103	0.0422523	1
ade3	FBgn0000053	XLOC_002306	2L	FBtr0339663;FBtr0079431;FBtr0100353	48.5984	-0.302094	0.422508	-0.715002	0.474608	1
ade5	FBgn0020513	XLOC_016242	X	FBtr0333799;FBtr0073705	23.9591	0.0625166	0.486385	0.128533	0.897727	1
AdenoK	FBgn0036337	XLOC_009431	3L	FBtr0346531;FBtr0075896;FBtr0075895	30.1957	-0.0322184	0.509207	-0.0632716	0.94955	1
Adf1	FBgn0000054	XLOC_003475	2R	FBtr0086111;FBtr0086113;FBtr0086112	14.0646	0.185822	0.510894	0.363719	0.716068	1
Adgf-A;Msi		XLOC_009748	3L	FBtr0075191;FBtr0075190;FBtr0075192;FBtr0110847;FBtr0110846	21.4932	-0.326966	0.490408	-0.666723	0.504949	1
Adgf-C	FBgn0038173	XLOC_010853	3R	FBtr0082821	19.3946	0.169003	0.494631	0.341675	0.732595	1
Adgf-D	FBgn0038172	XLOC_012840	3R	FBtr0082845	0.442998	0.163596	0.24015	0.681227	0.495728	1
Adgf-E	FBgn0033952	XLOC_005858	2R	FBtr0087482	1.1026	0.192537	0.253764	0.758724	0.448017	1
Adh;Adhr		XLOC_001189	2L	FBtr0100594;FBtr0100589;FBtr0100591;FBtr0100590;FBtr0100593;FBtr0343699	245.271	-0.0890027	0.292116	-0.304682	0.760608	0.977502
AdipoR	FBgn0038984	XLOC_013418	3R	FBtr0084283;FBtr0084282;FBtr0084284;FBtr0334561;FBtr0308848	66.3148	-0.010923	0.414835	-0.0263308	0.978993	0.998087
Adk1	FBgn0022709	XLOC_009376	3L	FBtr0076018;FBtr0076017	10.9543	-0.0694622	0.495317	-0.140238	0.888472	1
Adk2	FBgn0022708	XLOC_005000	2R	FBtr0072163	77.3329	0.431455	0.383248	1.12579	0.260256	0.810812
Adk3	FBgn0042094	XLOC_012634	3R	FBtr0339379;FBtr0339378;FBtr0082330;FBtr0082331	111.531	-0.460286	0.373826	-1.23128	0.218217	0.769922
AdoR	FBgn0039747	XLOC_013973	3R	FBtr0334658;FBtr0085581	3.67325	-0.0825875	0.426215	-0.193769	0.846356	1
adp	FBgn0000057	XLOC_004469	2R	FBtr0086744;FBtr0340288	14.6465	-0.0603799	0.511816	-0.117972	0.90609	1
AdSL	FBgn0038467	XLOC_013066	3R	FBtr0083373	7.87369	-0.130579	0.493531	-0.264581	0.791333	1
AdSS	FBgn0027493	XLOC_013301	3R	FBtr0083991	172.924	0.253971	0.32049	0.792447	0.4281	0.913587
Ady43A	FBgn0026602	XLOC_005250	2R	FBtr0089050	220.026	-0.547702	0.388409	-1.41012	0.158506	0.69517
Aef1	FBgn0005694	XLOC_008337	3L	FBtr0330156;FBtr0078349;FBtr0078348;FBtr0078350	34.1022	-0.540903	0.45531	-1.18799	0.234838	1
aft	FBgn0026309	XLOC_004441	2R	FBtr0089549	392.55	0.341407	0.303109	1.12635	0.260017	0.810812
Afti	FBgn0038223	XLOC_012889	3R	FBtr0310001;FBtr0310000;FBtr0273391	47.9087	0.253225	0.451917	0.560335	0.575251	1
Ag5r	FBgn0015010	XLOC_016343	X	FBtr0305582;FBtr0333658;FBtr0073937	19.0343	0.113612	0.50974	0.222881	0.823628	1
Ag5r2	FBgn0020508	XLOC_016342	X	FBtr0073938	39.4077	-1.5867	0.481715	-3.29386	0.000988207	1
AGBE	FBgn0053138	XLOC_004030	2R	FBtr0087732	57.8385	-0.500992	0.426358	-1.17505	0.239975	0.79425
ago	FBgn0041171	XLOC_008809	3L	FBtr0073247;FBtr0073246;FBtr0073245	51.2304	-0.0608498	0.413561	-0.147136	0.883024	1
AGO1	FBgn0262739	XLOC_005808	2R	FBtr0305592;FBtr0087612;FBtr0087614;FBtr0087613	263.981	0.58717	0.36966	1.58841	0.112195	0.618552
AGO2	FBgn0087035	XLOC_007893	3L	FBtr0075560;FBtr0075559;FBtr0331933	820.019	-0.363053	0.274291	-1.3236	0.185635	0.717091
AGO3	FBgn0250816	XLOC_008470	3L	FBtr0299882;FBtr0299881;FBtr0301725;FBtr0299880	92.9736	0.227067	0.35972	0.631235	0.527887	0.93778
agt	FBgn0024912	XLOC_012304	3R	FBtr0081697	336.527	-0.207817	0.297387	-0.69881	0.484671	0.932543
Ahcy13	FBgn0014455	XLOC_015154	X	FBtr0332590;FBtr0074030;FBtr0346181	32.1161	0.0897605	0.469391	0.191228	0.848347	1
Ahcy89E	FBgn0015011	XLOC_013059	3R	FBtr0083378;FBtr0083379	15.8574	-0.0952755	0.509821	-0.18688	0.851755	1
AIF	FBgn0031392	XLOC_000212	2L	FBtr0077831;FBtr0330657;FBtr0077830	12.28	0.195996	0.514801	0.380721	0.70341	1
Ak6	FBgn0033754	XLOC_005700	2R	FBtr0087891	14.0592	-0.670911	0.509762	-1.31613	0.188132	1
Akap200	FBgn0027932	XLOC_000711	2L	FBtr0079667;FBtr0079664;FBtr0340239;FBtr0340240;FBtr0340241;FBtr0079665;FBtr0079666	180.692	-0.210216	0.329063	-0.638831	0.522933	0.93778
AkhR	FBgn0025595	XLOC_002276	2L	FBtr0079310;FBtr0332331;FBtr0079309;FBtr0079308	1.13602	-0.221131	0.261966	-0.844122	0.398601	1
akirin	FBgn0082598	XLOC_007332	3L	FBtr0302545;FBtr0076848;FBtr0302544;FBtr0076849;FBtr0302543;FBtr0332730	29.7487	0.366083	0.501852	0.729464	0.465718	1
Akt1	FBgn0010379	XLOC_011003	3R	FBtr0083227;FBtr0083226;FBtr0344717;FBtr0344470	34.3282	0.0425049	0.446637	0.0951666	0.924182	1
al	FBgn0000061	XLOC_000083	2L	FBtr0078053	1.60167	0.067793	0.299359	0.226461	0.820843	1
Alas	FBgn0020764	XLOC_004991	2R	FBtr0072151	36.8729	0.11142	0.471914	0.236101	0.813354	1
alc	FBgn0260972	XLOC_005424	2R	FBtr0088625;FBtr0088624	265.426	0.787265	0.348328	2.26013	0.0238133	0.32854
ald	FBgn0000063	XLOC_011134	3R	FBtr0331348;FBtr0083478	170.593	0.0139577	0.359591	0.0388155	0.969037	0.998087
Ald	FBgn0000064	XLOC_013730	3R	FBtr0084994;FBtr0339614;FBtr0084999;FBtr0310660;FBtr0084995;FBtr0085000;FBtr0114544;FBtr0306657;FBtr0085001;FBtr0310661	130.302	-0.36124	0.346049	-1.0439	0.296532	0.834838
Aldh	FBgn0012036	XLOC_000782	2L	FBtr0079806;FBtr0332597	69.7008	0.0414993	0.382575	0.108474	0.91362	0.992493
Aldh-III	FBgn0010548	XLOC_005268	2R	FBtr0300478;FBtr0310676;FBtr0300477;FBtr0088993;FBtr0310675;FBtr0336912;FBtr0300479;FBtr0088996;FBtr0310674;FBtr0300480;FBtr0308198;FBtr0300481	111.605	0.357824	0.361665	0.989379	0.322478	0.847072
Alg10	FBgn0052076	XLOC_007604	3L	FBtr0076217	2.16968	-0.0272568	0.326183	-0.0835628	0.933404	1
Alg-2	FBgn0086378	XLOC_010151	3R	FBtr0301810	7.76727	-0.155666	0.510028	-0.30521	0.760206	1
Alh	FBgn0261238	XLOC_012338	3R	FBtr0334674;FBtr0334676;FBtr0334675;FBtr0300495;FBtr0300494;FBtr0113200;FBtr0081614;FBtr0334673;FBtr0081613;FBtr0334677;FBtr0334672;FBtr0081612	59.695	-0.257521	0.44456	-0.579271	0.562407	0.947536
alien	FBgn0013746	XLOC_002462	2L	FBtr0339550;FBtr0079781;FBtr0343095;FBtr0079780	423.22	-0.979341	0.270719	-3.61756	0.000297392	0.0214142
ALiX	FBgn0086346	XLOC_013823	3R	FBtr0085241	69.7586	0.0206459	0.384691	0.0536689	0.957199	0.998087
Alk	FBgn0040505	XLOC_006014	2R	FBtr0331926;FBtr0087118	28.5229	0.627674	0.496481	1.26424	0.206142	1
AlkB	FBgn0065035	XLOC_016432	X	FBtr0074168	10.1937	-0.352873	0.515087	-0.685074	0.493297	1
alph	FBgn0086361	XLOC_011957	3R	FBtr0309241;FBtr0085442;FBtr0085443;FBtr0085444;FBtr0085445;FBtr0085446	76.1587	-0.545712	0.406688	-1.34184	0.179647	0.712452
alpha4GT1	FBgn0031491	XLOC_001993	2L	FBtr0077670	38.261	-0.071972	0.448486	-0.160478	0.872505	1
alpha4GT2	FBgn0039378	XLOC_011718	3R	FBtr0300129	1.03366	0.190544	0.252882	0.753492	0.451154	1
alpha-Cat	FBgn0010215	XLOC_010129	3L	FBtr0339894;FBtr0070038	18.0213	0.820418	0.505279	1.62369	0.104441	1
alpha-catenin-related	FBgn0029105	XLOC_004989	2R	FBtr0072148	13.2006	-0.0902728	0.510048	-0.176989	0.859517	1
alphaCOP	FBgn0025725	XLOC_008622	3L	FBtr0072812;FBtr0072811	38.2741	-0.0453969	0.448503	-0.101219	0.919377	1
alpha-Est1	FBgn0015568	XLOC_012383	3R	FBtr0081544	27.2257	-0.0798418	0.48693	-0.16397	0.869755	1
alpha-Est10	FBgn0015569	XLOC_012371	3R	FBtr0305911;FBtr0289953;FBtr0305910	6.24573	0.417699	0.490785	0.851083	0.394723	1
alpha-Est2	FBgn0015570	XLOC_010402	3R	FBtr0310421;FBtr0081540	43.4946	0.714171	0.430829	1.65767	0.0973846	1
alpha-Est3	FBgn0015571	XLOC_012382	3R	FBtr0339708;FBtr0310527;FBtr0300496;FBtr0081545	422.469	-0.117945	0.29881	-0.394715	0.693053	0.969394
alpha-Est4	FBgn0015572	XLOC_012381	3R	FBtr0081546	290.563	-0.511493	0.320501	-1.59592	0.110507	0.613591
alpha-Est5	FBgn0261393	XLOC_012380	3R	FBtr0307274;FBtr0081547	68.8497	0.0535552	0.381707	0.140305	0.888419	0.992493
alpha-Est6	FBgn0015574	XLOC_012378	3R	FBtr0081549	14.7466	0.12911	0.512375	0.251984	0.801053	1
alpha-Est7	FBgn0015575	XLOC_012377	3R	FBtr0081550	40.026	-0.281117	0.477514	-0.588711	0.556055	1
alpha-Est8	FBgn0015576	XLOC_012375	3R	FBtr0081553	15.0367	-1.14117	0.513989	-2.22022	0.0264035	1
alpha-Est9	FBgn0015577	XLOC_012373	3R	FBtr0302355;FBtr0302354	34.1179	-0.287733	0.45029	-0.638994	0.522827	1
alphagamma-element:CR32865	FBgn0052865	XLOC_012753	3R	FBtr0082678	0.612556	0.176021	0.246291	0.714687	0.474802	1
alphaKap4	FBgn0035657	XLOC_008923	3L	FBtr0077069	1.74115	0.0933236	0.308773	0.30224	0.762469	1
alpha-Man-I	FBgn0259170	XLOC_016108	X	FBtr0300512;FBtr0300511;FBtr0299633;FBtr0300515;FBtr0300516;FBtr0300514;FBtr0300513;FBtr0331759;FBtr0299632	38.3904	-0.036059	0.450952	-0.079962	0.936267	1
alpha-Man-Ib	FBgn0039634	XLOC_013885	3R	FBtr0085416	14.528	-0.109197	0.509822	-0.214187	0.830401	1
alpha-Man-II	FBgn0011740	XLOC_010533	3R	FBtr0334302;FBtr0082031	42.1502	-0.0117259	0.454756	-0.0257851	0.979429	1
alpha-Man-IIb	FBgn0026616	XLOC_010981	3R	FBtr0083179;FBtr0334593;FBtr0345238	5.28934	0.130598	0.45074	0.289742	0.772013	1
alphaSnap	FBgn0250791	XLOC_008239	3L	FBtr0074840	52.6648	0.18197	0.425935	0.427226	0.669215	1
alpha-Spec;dlt		XLOC_008641	3L	FBtr0332880;FBtr0332879;FBtr0072789;FBtr0332878;FBtr0072790	611.498	-0.114848	0.311115	-0.369151	0.712016	0.972543
alphaTry	FBgn0003863	XLOC_005593	2R	FBtr0088161	838.394	-1.1263	0.327521	-3.43885	0.000584184	0.0356262
alphaTub67C	FBgn0087040	XLOC_007512	3L	FBtr0076393	21.5343	0.440298	0.497164	0.885619	0.375823	1
alphaTub84B	FBgn0003884	XLOC_010361	3R	FBtr0081639	95.7159	-0.0262066	0.372711	-0.0703136	0.943944	0.998087
alphaTub84D	FBgn0003885	XLOC_010401	3R	FBtr0081538	28.9556	0.235543	0.51162	0.460386	0.645239	1
alphaTub85E	FBgn0003886	XLOC_012548	3R	FBtr0082087	1.11721	-0.0395778	0.264294	-0.149749	0.880963	1
alrm	FBgn0039332	XLOC_013664	3R	FBtr0084846	0.442998	0.163596	0.24015	0.681227	0.495728	1
Als2	FBgn0037116	XLOC_010058	3L	FBtr0078462	24.1238	-0.752646	0.478807	-1.57192	0.115969	1
alt	FBgn0038535	XLOC_013119	3R	FBtr0335026;FBtr0335027;FBtr0089416;FBtr0089415;FBtr0089414;FBtr0089417;FBtr0089413;FBtr0089412	347.482	-0.169911	0.346011	-0.491057	0.623386	0.958939
amd	FBgn0000075	XLOC_001470	2L	FBtr0081153;FBtr0081154	5.25883	-0.419339	0.425127	-0.986385		1
amn	FBgn0086782	XLOC_016708	X	FBtr0074802	892.5	-0.405299	0.279367	-1.45078	0.146841	0.685606
Amnionless	FBgn0025686	XLOC_001786	2L	FBtr0078134;FBtr0330647	2.60834	0.166561	0.39877	0.417686	0.676177	1
amon	FBgn0023179	XLOC_013747	3R	FBtr0085048	8.42234	-0.253183	0.511541	-0.494942	0.620641	1
amos	FBgn0003270	XLOC_003087	2L	FBtr0081081	5.10253	0.72506	0.471408	1.53807	0.124031	1
AMPdeam	FBgn0052626	XLOC_016302	X	FBtr0309245;FBtr0073833;FBtr0340445;FBtr0309246;FBtr0303292;FBtr0301046;FBtr0340444;FBtr0301045;FBtr0301044	123.401	-0.153018	0.347239	-0.440671	0.659451	0.963487
Amph	FBgn0027356	XLOC_003992	2R	FBtr0333100;FBtr0333099;FBtr0087828	64.9779	0.274126	0.383755	0.714324	0.475027	0.932543
AMPKalpha	FBgn0023169	XLOC_014392	X	FBtr0070216;FBtr0070218;FBtr0070217	598.278	-0.072375	0.321705	-0.224973	0.822	0.985388
Amun	FBgn0030328	XLOC_016188	X	FBtr0073619;FBtr0073615;FBtr0345164;FBtr0303336;FBtr0333796;FBtr0303337;FBtr0073618;FBtr0073617;FBtr0303339;FBtr0303338;FBtr0073616;FBtr0333797	51.3672	-0.256318	0.432219	-0.593029	0.553162	1
amx	FBgn0000077	XLOC_016059	X	FBtr0307281;FBtr0071331	13.6552	-0.310131	0.513464	-0.603998	0.545845	1
Amy-d	FBgn0000078	XLOC_004353	2R	FBtr0086983	61.368	-1.36597	0.405724	-3.36674	0.000760634	0.0391578
Amy-p	FBgn0000079	XLOC_006056	2R	FBtr0345521;FBtr0087004	235.155	-1.17118	0.35223	-3.32504	0.000884065	0.0438054
Amyrel	FBgn0020506	XLOC_006015	2R	FBtr0087117	3.30954	0.114743	0.383553	0.299157	0.76482	1
ana	FBgn0011746	XLOC_003680	2R	FBtr0339284;FBtr0300501;FBtr0088559	1.5953	-0.355805	0.318462	-1.11726	0.263883	1
ana1	FBgn0262167	XLOC_011593	3R	FBtr0334335;FBtr0084645	79.1643	-0.0200303	0.415081	-0.0482564	0.961512	0.998087
ana2	FBgn0027513	XLOC_005397	2R	FBtr0339310;FBtr0088685	221.678	0.227097	0.298064	0.761908	0.446115	0.926701
ana3	FBgn0266111	XLOC_003950	2R	FBtr0087904	49.1099	0.156683	0.418989	0.373956	0.708437	1
Ance	FBgn0012037	XLOC_001146	2L	FBtr0080552;FBtr0343667;FBtr0080553	141.54	0.00193481	0.350417	0.00552146	0.995595	0.998087
Ance-2	FBgn0032535	XLOC_001147	2L	FBtr0080554	2.67988	0.495423	0.371719	1.33279	0.182601	1
Ance-3	FBgn0032536	XLOC_001149	2L	FBtr0100327;FBtr0343641	1.07469	0.234959	0.277667	0.846188	0.397448	1
Ance-4	FBgn0033366	XLOC_005414	2R	FBtr0339288;FBtr0088664	1.01101	-0.032415	0.257769	-0.125752	0.899928	1
Ance-5	FBgn0035076	XLOC_006815	2R	FBtr0072420	65.8989	-0.381671	0.419401	-0.91004	0.362801	0.877728
Andorra	FBgn0030898	XLOC_016588	X	FBtr0074591	17.092	-0.0521511	0.498107	-0.104699	0.916615	1
angel	FBgn0016762	XLOC_004954	2R	FBtr0072083	26.1417	-1.26058	0.481121	-2.62009	0.00879073	1
Ank	FBgn0011747	XLOC_014168	4	FBtr0300497;FBtr0089173;FBtr0089172;FBtr0089171	74.8782	0.410473	0.384004	1.06893	0.285101	0.829158
Ank2;CG44195		XLOC_009049	3L	FBtr0303117;FBtr0303122;FBtr0303125;FBtr0344224;FBtr0344222;FBtr0303123;FBtr0303121;FBtr0303114;FBtr0303113;FBtr0303112;FBtr0303111;FBtr0334060;FBtr0344223;FBtr0303124;FBtr0303115;FBtr0336853;FBtr0303118;FBtr0303119;FBtr0334061;FBtr0334062;FBtr0303120	568.878	0.658296	0.504402	1.3051		1
Anp	FBgn0000094	XLOC_012017	3R	FBtr0085611;FBtr0346141	0.56801	-0.194549	0.245753	-0.791644	0.428568	1
Ant2;sesB		XLOC_016135	X	FBtr0333963;FBtr0073425;FBtr0073426;FBtr0073424;FBtr0073423;FBtr0073422;FBtr0073421;FBtr0346384	579.66	0.0864268	0.254822	0.339165	0.734485	0.972543
antdh	FBgn0026268	XLOC_016162	X	FBtr0073468	27.28	-0.402683	0.48049	-0.838069	0.401992	1
Antp	FBgn0260642	XLOC_012330	3R	FBtr0081653;FBtr0081656;FBtr0081652;FBtr0081648;FBtr0081650;FBtr0081651;FBtr0081649;FBtr0081647;FBtr0081655;FBtr0081654;FBtr0081646	9.09601	-0.315856	0.514481	-0.613931	0.539261	1
antr	FBgn0050488	XLOC_005722	2R	FBtr0306584;FBtr0087818	1.62356	0.0848322	0.327501	0.259029	0.795613	1
AnxB10	FBgn0000084	XLOC_016738	X	FBtr0301931;FBtr0070025	94.4717	0.138269	0.361853	0.382115	0.702376	0.972543
AnxB11	FBgn0030749	XLOC_016467	X	FBtr0334040;FBtr0334042;FBtr0334039;FBtr0334038;FBtr0334041;FBtr0074303;FBtr0074302	1492.57	0.248451	0.295185	0.84168	0.399967	0.90042
AnxB9	FBgn0000083	XLOC_011338	3R	FBtr0336798;FBtr0089519;FBtr0089517;FBtr0089520;FBtr0089518;FBtr0336797	172.844	0.264327	0.337784	0.782533	0.433901	0.914951
aop	FBgn0000097	XLOC_001904	2L	FBtr0077851;FBtr0330658;FBtr0077850;FBtr0330659;FBtr0330660	111.761	-0.179427	0.349783	-0.512967	0.607975	0.958939
aos	FBgn0004569	XLOC_009661	3L	FBtr0075408	42.5414	-0.118142	0.451429	-0.261707	0.793548	1
Aos1	FBgn0029512	XLOC_012748	3R	FBtr0082593	128.987	-0.209175	0.356602	-0.586579	0.557486	0.947075
AOX1	FBgn0267408	XLOC_012976	3R	FBtr0083154	511.687	-0.092667	0.276506	-0.335135	0.737523	0.972543
AOX2	FBgn0038348	XLOC_012977	3R	FBtr0345258	9.77306	0.0992111	0.501746	0.197732	0.843255	1
AOX3	FBgn0038349	XLOC_012978	3R	FBtr0083151	89.0394	-0.333635	0.360607	-0.925203	0.35486	0.873384
AOX4	FBgn0038350	XLOC_012979	3R	FBtr0083150	50.6569	0.41987	0.39737	1.05662		1
ap	FBgn0000099	XLOC_005154	2R	FBtr0086059;FBtr0086058;FBtr0300504;FBtr0335274	9.56107	0.407689	0.507759	0.802919	0.422022	1
AP-1-2beta	FBgn0010380	XLOC_015429	X	FBtr0074789	38.3123	-0.497906	0.478892	-1.0397	0.298477	1
AP-1gamma	FBgn0030089	XLOC_014807	X	FBtr0071296;FBtr0071294;FBtr0112965;FBtr0071298;FBtr0071297;FBtr0071295;FBtr0333808;FBtr0309255;FBtr0309254	71.1476	-0.0179707	0.394693	-0.0455309	0.963684	0.998087
AP-1mu	FBgn0024833	XLOC_012526	3R	FBtr0082114	183.201	0.379845	0.336884	1.12752	0.259522	0.810812
AP-1sigma	FBgn0039132	XLOC_011535	3R	FBtr0335244;FBtr0305040;FBtr0305039;FBtr0084496	10.2501	0.236905	0.509326	0.465135	0.641835	1
AP-2alpha	FBgn0264855	XLOC_001795	2L	FBtr0089488;FBtr0089489	23.998	-0.212161	0.506212	-0.419115	0.675132	1
AP-2mu	FBgn0263351	XLOC_011439	3R	FBtr0301866;FBtr0084253;FBtr0084252	18.6533	0.173257	0.506972	0.341749	0.73254	1
AP-2sigma	FBgn0043012	XLOC_013338	3R	FBtr0084103	8.84439	0.898476	0.500066	1.79672		1
Apc	FBgn0015589	XLOC_013871	3R	FBtr0336767;FBtr0085351	85.6331	-0.0952437	0.40023	-0.237972	0.811903	0.985388
APC10	FBgn0034231	XLOC_006089	2R	FBtr0086951	64.3647	0.177596	0.403364	0.440287	0.659729	0.963487
Apc2	FBgn0026598	XLOC_011557	3R	FBtr0084552	203.902	0.276523	0.330904	0.835659	0.403347	0.90042
APC4	FBgn0052707	XLOC_014800	X	FBtr0071285;FBtr0309872	1.05555	0.229201	0.274766	0.834167	0.404187	1
APC7	FBgn0029879	XLOC_014661	X	FBtr0070946;FBtr0070947	34.9097	0.352071	0.446769	0.788039	0.430674	1
ApepP	FBgn0026150	XLOC_003003	2L	FBtr0304931;FBtr0080956	143.016	-0.216376	0.349497	-0.619108	0.535845	0.937926
Apf	FBgn0051713	XLOC_002516	2L	FBtr0079895	7.85937	-0.126917	0.491012	-0.258481	0.796036	1
aph-1	FBgn0031458	XLOC_000260	2L	FBtr0077716;FBtr0335127	4.95224	0.180856	0.445292	0.406151	0.684632	1
Aph-4	FBgn0016123	XLOC_012069	3R	FBtr0085733;FBtr0085734	213.894	0.651613	0.308264	2.11381	0.0345312	0.389018
aPKC	FBgn0261854	XLOC_005886	2R	FBtr0303434;FBtr0329890;FBtr0329889;FBtr0329888;FBtr0329887;FBtr0303431;FBtr0303437;FBtr0303432;FBtr0303429;FBtr0303435;FBtr0303430	19.8594	-0.347606	0.510774	-0.680548	0.496158	1
Aplip1	FBgn0040281	XLOC_006913	3L	FBtr0072627;FBtr0072626	0.674208	-0.194293	0.245566	-0.791208	0.428823	1
Apoltp	FBgn0032136	XLOC_000801	2L	FBtr0303874	83.5582	-0.754845	0.38539	-1.95865	0.0501537	0.458926
app	FBgn0260941	XLOC_009378	3L	FBtr0334103;FBtr0334102;FBtr0339925;FBtr0304661;FBtr0301057;FBtr0301056;FBtr0301055;FBtr0301054;FBtr0301053;FBtr0301052	111.357	-1.26758	0.511755	-2.47694		1
Appl	FBgn0000108	XLOC_014336	X	FBtr0307293;FBtr0307295;FBtr0307292;FBtr0070109;FBtr0307294;FBtr0307291	295.571	0.773354	0.387162	1.9975	0.0457712	0.444004
Aprt	FBgn0000109	XLOC_008652	3L	FBtr0346440;FBtr0089420;FBtr0346441	1.7857	0.367962	0.333185	1.10438	0.26943	1
Aps	FBgn0036111	XLOC_009254	3L	FBtr0076250;FBtr0076252;FBtr0076251	90.1775	-0.0954289	0.433808	-0.21998	0.825887	0.985388
apt	FBgn0015903	XLOC_004947	2R	FBtr0072068;FBtr0072067;FBtr0072066;FBtr0072069;FBtr0072070;FBtr0332926	31.3206	-0.374747	0.468039	-0.800675	0.42332	1
AQP	FBgn0033807	XLOC_005748	2R	FBtr0087766;FBtr0300286	3.26641	-0.394187	0.387748	-1.01661	0.30934	1
ara	FBgn0015904	XLOC_007723	3L	FBtr0300551;FBtr0075908	4.03186	-0.120873	0.405928	-0.297771	0.765878	1
aralar1	FBgn0028646	XLOC_014007	3R	FBtr0085694;FBtr0085693;FBtr0306586;FBtr0085692;FBtr0085695	30.2571	0.96288	0.465801	2.06715	0.0387201	1
Arc1	FBgn0033926	XLOC_005836	2R	FBtr0087560	833.739	-0.69767	0.25335	-2.75378	0.00589119	0.155685
Arc2	FBgn0033928	XLOC_004115	2R	FBtr0087547	1.66535	0.34467	0.324857	1.06099	0.288694	1
Arc42	FBgn0038742	XLOC_011263	3R	FBtr0083817	12.0544	-1.13524	0.51256	-2.21485	0.0267702	1
aret	FBgn0000114	XLOC_001035	2L	FBtr0331998;FBtr0331648;FBtr0331646;FBtr0080344;FBtr0331645;FBtr0331647;FBtr0300567;FBtr0080345;FBtr0331644;FBtr0080347	30.4815	1.32135	0.495682	2.66572	0.0076824	1
Arf102F	FBgn0013749	XLOC_014155	4	FBtr0333699;FBtr0089192	9.86966	-0.427765	0.513557	-0.832946	0.404875	1
Arf51F	FBgn0013750	XLOC_004194	2R	FBtr0087378;FBtr0087377;FBtr0087376;FBtr0087375;FBtr0087379	20.3575	0.629243	0.511691	1.22973	0.218797	1
Arf79F	FBgn0010348	XLOC_010120	3L	FBtr0299906;FBtr0078575;FBtr0078574;FBtr0332054;FBtr0078573;FBtr0112858;FBtr0078571;FBtr0299907	142.141	-0.0899152	0.356206	-0.252424	0.800713	0.984979
ArfGAP1	FBgn0020655	XLOC_009390	3L	FBtr0332088;FBtr0075981	54.6724	-0.470244	0.450495	-1.04384	0.29656	1
ArfGAP3	FBgn0037182	XLOC_010109	3L	FBtr0078539;FBtr0330175;FBtr0331775;FBtr0330174;FBtr0330173;FBtr0078540;FBtr0113186	34.552	0.477086	0.466213	1.02332	0.306156	1
Arfip	FBgn0037884	XLOC_012657	3R	FBtr0082364	35.7619	0.514895	0.475863	1.08202	0.279243	1
Arfrp1	FBgn0030088	XLOC_014806	X	FBtr0071293	79.7131	-1.11761	0.384606	-2.90585	0.00366262	0.116149
arg	FBgn0023535	XLOC_014335	X	FBtr0070088	28.397	-0.169314	0.485209	-0.348951	0.727126	1
Argk	FBgn0000116	XLOC_009151	3L	FBtr0345030;FBtr0076546;FBtr0076544;FBtr0331550;FBtr0076545;FBtr0112791;FBtr0076543	440.964	-0.363767	0.279001	-1.30382	0.192294	0.732937
ari-1	FBgn0017418	XLOC_016587	X	FBtr0306057;FBtr0332851;FBtr0332850;FBtr0089507;FBtr0089508;FBtr0089506	87.9138	-0.126476	0.381885	-0.331189	0.740502	0.972543
ari-2	FBgn0025186	XLOC_004830	2R	FBtr0071774	18.4182	0.963657	0.512934	1.87872	0.0602834	1
Arl1	FBgn0000115	XLOC_007928	3L	FBtr0075517	14.921	0.147765	0.515232	0.286794	0.77427	1
Arl2	FBgn0004908	XLOC_010459	3R	FBtr0081838	37.8049	0.379849	0.471417	0.805759	0.420382	1
Arl4	FBgn0039889	XLOC_014172	4	FBtr0308248;FBtr0333677;FBtr0089153	11.4721	0.0161289	0.515142	0.0313097	0.975023	1
Arl6	FBgn0034446	XLOC_004592	2R	FBtr0340534;FBtr0086534	24.4443	0.780807	0.4929	1.58411	0.113169	1
arm	FBgn0000117	XLOC_015644	X	FBtr0332583;FBtr0089988;FBtr0089990;FBtr0089989;FBtr0089991;FBtr0089992	83.1449	0.08897	0.399797	0.222538	0.823895	0.985388
armi	FBgn0041164	XLOC_007099	3L	FBtr0309841;FBtr0100641;FBtr0309840	6.3674	0.0728924	0.421047	0.173122	0.862556	1
Arp1	FBgn0011745	XLOC_010789	3R	FBtr0082652	18.8762	-0.22039	0.498581	-0.442035	0.658464	1
Arp10	FBgn0031050	XLOC_016688	X	FBtr0074760;FBtr0345991	50.7588	0.221127	0.443342	0.498774	0.617939	1
Arp2	FBgn0011742	XLOC_016475	X	FBtr0112868;FBtr0310673;FBtr0074295	56.0997	-0.320252	0.413154	-0.775138	0.438258	0.920168
Arp3	FBgn0262716	XLOC_009076	3L	FBtr0076737;FBtr0334087	55.3219	0.114951	0.420673	0.273255	0.784657	0.981588
Arp5	FBgn0038576	XLOC_011160	3R	FBtr0083557;FBtr0336468	134.547	-0.0160326	0.363351	-0.0441242	0.964805	0.998087
Arp53D	FBgn0011743	XLOC_004306	2R	FBtr0340069	1.4891	-0.350407	0.316534	-1.10701	0.268289	1
Arp6	FBgn0011741	XLOC_016416	X	FBtr0074203	59.7139	-0.049818	0.414623	-0.120152	0.904362	0.992493
Arp8	FBgn0030877	XLOC_016575	X	FBtr0074544	62.0669	0.299456	0.436904	0.685404	0.493089	0.932543
Arpc1	FBgn0001961	XLOC_002802	2L	FBtr0080570;FBtr0080569	45.8591	0.0987631	0.451278	0.218852	0.826765	1
Arpc2	FBgn0032859	XLOC_001541	2L	FBtr0346418;FBtr0081358	26.7286	0.338192	0.49111	0.688628	0.491057	1
Arpc3A	FBgn0038369	XLOC_010983	3R	FBtr0300570;FBtr0334594	221.307	0.120703	0.351312	0.343578	0.731163	0.972543
Arpc3B	FBgn0065032	XLOC_016519	X	FBtr0113478;FBtr0334462;FBtr0074410	28.8018	-0.284555	0.468938	-0.606808	0.543978	1
Arpc4	FBgn0031781	XLOC_000539	2L	FBtr0079200	43.0896	-0.0771982	0.434818	-0.177541	0.859083	1
Arpc5	FBgn0031437	XLOC_000243	2L	FBtr0077694;FBtr0335170	114.452	-0.116779	0.354002	-0.329881	0.74149	0.972543
arr	FBgn0000119	XLOC_005777	2R	FBtr0087702	15.9911	0.589255	0.510396	1.1545	0.248293	1
Arr1	FBgn0000120	XLOC_001394	2L	FBtr0081030;FBtr0307350;FBtr0340229	1.07469	0.234959	0.277667	0.846188	0.397448	1
Ars2	FBgn0033062	XLOC_005173	2R	FBtr0086020;FBtr0310667;FBtr0310666;FBtr0310665;FBtr0086018;FBtr0086021	46.4082	0.0367624	0.419521	0.0876293	0.930171	1
Art1	FBgn0037834	XLOC_012622	3R	FBtr0082304	20.8206	-0.197763	0.490098	-0.403517	0.686568	1
Art3	FBgn0038306	XLOC_012946	3R	FBtr0083135;FBtr0083134	4.2592	0.168598	0.433165	0.389223	0.697111	1
Art4	FBgn0037770	XLOC_012571	3R	FBtr0333687;FBtr0082150	487.002	-0.321716	0.287674	-1.11834	0.263423	0.810981
Art7	FBgn0034817	XLOC_006629	2R	FBtr0114564	12.8146	0.337681	0.513834	0.657178	0.511066	1
Art8	FBgn0032329	XLOC_002628	2L	FBtr0080162	82.7874	0.431462	0.361278	1.19426	0.232375	0.785424
aru	FBgn0029095	XLOC_001822	2L	FBtr0078033;FBtr0078032;FBtr0078031	58.308	0.241953	0.459738	0.526285	0.59869	0.957465
arx	FBgn0036826	XLOC_009823	3L	FBtr0075075	28.011	-0.00535101	0.478355	-0.0111863	0.991075	1
Asap	FBgn0050372	XLOC_005335	2R	FBtr0339300;FBtr0300954;FBtr0100140	114.296	-0.233782	0.333939	-0.700074	0.483881	0.932543
Asator	FBgn0039908	XLOC_014185	4	FBtr0332906;FBtr0300342;FBtr0332905;FBtr0300344;FBtr0332904;FBtr0300343;FBtr0332908;FBtr0332907;FBtr0344869	720.759	-0.163075	0.320179	-0.509325	0.610525	0.958939
Asciz	FBgn0035407	XLOC_008723	3L	FBtr0073112;FBtr0329990	121.471	-0.205052	0.331165	-0.619184	0.535795	0.937926
ase	FBgn0000137	XLOC_014328	X	FBtr0070075	1.47666	0.245534	0.281661	0.871737	0.383352	1
asf1	FBgn0029094	XLOC_008192	3L	FBtr0074947	8.76756	0.316743	0.495197	0.639629	0.522414	1
ash1	FBgn0005386	XLOC_009879	3L	FBtr0306010;FBtr0306009	15.8636	0.357755	0.50729	0.705227	0.480669	1
ash2	FBgn0000139	XLOC_011603	3R	FBtr0084660;FBtr0306171;FBtr0084659	13.8593	0.138016	0.51427	0.268373	0.788412	1
asl	FBgn0261004	XLOC_012244	3R	FBtr0078743	17.096	0.123646	0.514168	0.240477	0.80996	1
asp	FBgn0000140	XLOC_011613	3R	FBtr0084692	34.8378	-0.172643	0.467245	-0.36949	0.711762	1
asparagine-synthetase	FBgn0041607	XLOC_008311	3L	FBtr0089463	11.6177	-0.507656	0.515311	-0.985146	0.324553	1
Asph	FBgn0034075	XLOC_004244	2R	FBtr0336734;FBtr0305090;FBtr0305092;FBtr0310447;FBtr0305091;FBtr0300575;FBtr0087220;FBtr0087219	329.624	-1.86597	0.339453	-5.497	3.8631e-08	9.57083e-06
ASPP	FBgn0034606	XLOC_006466	2R	FBtr0071623;FBtr0071622;FBtr0330232	15.8478	-0.141936	0.509613	-0.278518	0.780615	1
asrij	FBgn0034793	XLOC_004898	2R	FBtr0071902;FBtr0332909	4.28359	-0.0111392	0.437237	-0.0254764	0.979675	1
ast	FBgn0015905	XLOC_000137	2L	FBtr0077952	16.4683	0.146123	0.502028	0.291065	0.771002	1
AstA	FBgn0015591	XLOC_013596	3R	FBtr0084744;FBtr0346367	5.90002	-0.62177	0.437649	-1.4207	0.155403	1
AstA-R1	FBgn0266429	XLOC_014504	X	FBtr0333798;FBtr0070575	31.5788	-1.67272	0.49034	-3.41134	0.000646434	1
AstA-R2	FBgn0039595	XLOC_013864	3R	FBtr0085316;FBtr0336790;FBtr0308641	2.76795	0.668253	0.413202	1.61725	0.105823	1
AstC	FBgn0032336	XLOC_002632	2L	FBtr0301761;FBtr0080234	7.81936	-0.401962	0.511468	-0.785899	0.431927	1
AstCC	FBgn0032337	XLOC_002633	2L	FBtr0343623;FBtr0114455	2.92172	0.0929965	0.384636	0.241778	0.808952	1
AstC-R1	FBgn0036790	XLOC_008111	3L	FBtr0089578	0.92109	-0.201544	0.250875	-0.803366	0.421763	1
AstC-R2	FBgn0036789	XLOC_009801	3L	FBtr0332867;FBtr0089387	3.43442	-0.180313	0.388488	-0.464139	0.642548	1
asun	FBgn0020407	XLOC_011017	3R	FBtr0083259	3.47693	-0.348638	0.367015	-0.949927	0.342149	1
Asx	FBgn0261823	XLOC_004132	2R	FBtr0332930;FBtr0087493;FBtr0332929;FBtr0100154	38.8314	0.322862	0.472903	0.682723	0.494782	1
Atac1	FBgn0031876	XLOC_002301	2L	FBtr0079362	1.72976	0.0806299	0.329871	0.244429	0.806899	1
Atac2	FBgn0032691	XLOC_003089	2L	FBtr0081079	11.6671	-0.425065	0.508179	-0.836447	0.402904	1
Atac3	FBgn0052343	XLOC_008529	3L	FBtr0332840;FBtr0299838;FBtr0309236;FBtr0299831	3.97015	0.29084	0.405501	0.717236	0.473229	1
ATbp	FBgn0039946	XLOC_015538	X	FBtr0301978	3.83442	-0.590532	0.434218	-1.35999	0.173833	1
Ate1	FBgn0025720	XLOC_006376	2R	FBtr0086319;FBtr0336634;FBtr0086318;FBtr0086317	16.822	-0.954422	0.51518	-1.8526	0.0639395	1
Atet	FBgn0020762	XLOC_000384	2L	FBtr0077427;FBtr0077426;FBtr0112899;FBtr0112898	10.4394	-0.276624	0.498192	-0.555255	0.57872	1
Atf-2	FBgn0265193	XLOC_005090	2R	FBtr0339096	39.1329	0.519076	0.444	1.16909	0.242367	1
Atf3	FBgn0028550	XLOC_015609	X	FBtr0345507;FBtr0330391	209.523	-0.896764	0.378146	-2.37148	0.0177172	0.287228
Atf6	FBgn0033010	XLOC_003418	2R	FBtr0086081;FBtr0086079;FBtr0086080	25.4666	0.451257	0.482265	0.935705	0.349425	1
Atg1	FBgn0260945	XLOC_009414	3L	FBtr0075945;FBtr0300561	45.4925	-0.301018	0.418893	-0.718602	0.472386	1
Atg101	FBgn0030960	XLOC_015364	X	FBtr0074635	10.2355	0.392088	0.50793	0.771934	0.440154	1
Atg12	FBgn0036255	XLOC_007693	3L	FBtr0300011	52.4981	0.320197	0.425297	0.752879	0.451523	1
Atg13	FBgn0261108	XLOC_010463	3R	FBtr0081843	42.9925	0.0205981	0.482276	0.0427103	0.965933	1
Atg14	FBgn0039636	XLOC_011934	3R	FBtr0085370	26.5896	0.147303	0.488838	0.301334	0.76316	1
Atg16	FBgn0039705	XLOC_013937	3R	FBtr0085530;FBtr0085529;FBtr0339144;FBtr0085528	12.0438	0.56586	0.513889	1.10113	0.270838	1
Atg17	FBgn0037363	XLOC_010257	3R	FBtr0334946;FBtr0078716	71.665	-0.749736	0.411056	-1.82393	0.0681632	0.51174
Atg18a	FBgn0035850	XLOC_007382	3L	FBtr0346547;FBtr0321321;FBtr0321319;FBtr0076692;FBtr0076691;FBtr0321320;FBtr0076693	8.71126	-0.0123478	0.495318	-0.0249291	0.980112	1
Atg18b	FBgn0032935	XLOC_003290	2L	FBtr0331678;FBtr0081487	12.4167	0.229618	0.510625	0.449681	0.652941	1
Atg2	FBgn0044452	XLOC_007036	3L	FBtr0333441;FBtr0072970	167.671	-0.670475	0.326571	-2.05307	0.0400653	0.424155
Atg3	FBgn0036813	XLOC_008133	3L	FBtr0075055	41.1098	0.00700754	0.437334	0.0160233	0.987216	1
Atg4a	FBgn0031298	XLOC_000138	2L	FBtr0077953;FBtr0332569	1655.35	0.491222	0.292844	1.67742	0.0934603	0.577066
Atg4b	FBgn0038325	XLOC_012962	3R	FBtr0083115	22.1194	0.627564	0.492795	1.27348	0.202848	1
Atg5	FBgn0029943	XLOC_015937	X	FBtr0071065	55.8434	1.13973	0.465024	2.4509	0.0142498	0.251847
Atg6	FBgn0264325	XLOC_013542	3R	FBtr0084590	10.3409	0.381741	0.515327	0.740774	0.45883	1
Atg7	FBgn0034366	XLOC_006172	2R	FBtr0086712;FBtr0086711	93.9625	0.253577	0.370835	0.683799	0.494102	0.932543
Atg8a	FBgn0052672	XLOC_016134	X	FBtr0346376;FBtr0346375;FBtr0071498	196.733	0.19227	0.341661	0.56275	0.573605	0.949867
Atg9	FBgn0034110	XLOC_004271	2R	FBtr0329958	20.4635	-0.889193	0.503159	-1.76722	0.077191	1
atilla	FBgn0032422	XLOC_002711	2L	FBtr0331999;FBtr0273342	15.2028	-0.0369019	0.513744	-0.0718293	0.942738	1
atk;CG42764		XLOC_009962	3L	FBtr0331569;FBtr0078223;FBtr0331570;FBtr0331568;FBtr0303392;FBtr0303393	98.9511	0.00997624	0.391585	0.0254766	0.979675	0.998087
atl	FBgn0039213	XLOC_011602	3R	FBtr0084656;FBtr0084657;FBtr0345218	105.931	0.39349	0.395929	0.993838	0.320302	0.847072
atms	FBgn0010750	XLOC_010202	3R	FBtr0334899;FBtr0078868	96.9357	0.329516	0.383382	0.859497	0.390066	0.896232
ato	FBgn0010433	XLOC_010448	3R	FBtr0081828	0.442998	0.163596	0.24015	0.681227	0.495728	1
Atox1	FBgn0052446	XLOC_008361	3L	FBtr0078426	24.7309	-0.0724943	0.508459	-0.142576	0.886625	1
ATP7	FBgn0030343	XLOC_014969	X	FBtr0273257;FBtr0334454	111.908	-0.485877	0.346578	-1.40193	0.160937	0.696649
ATP8B	FBgn0037989	XLOC_012717	3R	FBtr0307016;FBtr0300351;FBtr0339646;FBtr0339645;FBtr0339644;FBtr0339643;FBtr0307015	23.3988	-0.281828	0.481735	-0.585027	0.558529	1
Atpalpha	FBgn0002921	XLOC_011333	3R	FBtr0333324;FBtr0333325;FBtr0089510;FBtr0089515;FBtr0300191;FBtr0089514;FBtr0089509;FBtr0089511;FBtr0089516;FBtr0089513;FBtr0089512	295.114	0.651318	0.305973	2.12867	0.0332812	0.384626
ATPCL	FBgn0020236	XLOC_005956	2R	FBtr0300597;FBtr0340016;FBtr0300598;FBtr0300596	193.677	0.316693	0.345476	0.916686	0.359307	0.8738
ATPsyn-b	FBgn0019644	XLOC_007522	3L	FBtr0076405	117.43	-0.195728	0.335703	-0.583039	0.559867	0.947536
ATPsyn-beta	FBgn0010217	XLOC_014152	4	FBtr0333672;FBtr0089186;FBtr0344754	336.272	0.435893	0.326042	1.33692	0.181248	0.712452
ATPsyn-Cf6	FBgn0016119	XLOC_013481	3R	FBtr0333777;FBtr0305982;FBtr0084432	17.9993	-0.0519006	0.512277	-0.101314	0.919302	1
ATPsyn-d	FBgn0016120	XLOC_011216	3R	FBtr0083728;FBtr0083727;FBtr0346155	36.9242	0.173826	0.462424	0.375901	0.70699	1
ATPsyn-gamma	FBgn0020235	XLOC_013928	3R	FBtr0085541;FBtr0085539;FBtr0085540	53.1863	0.336623	0.437726	0.769026	0.441878	1
AttA	FBgn0012042	XLOC_004156	2R	FBtr0087437	6.82114	0.240871	0.475607	0.50645	0.612541	1
AttB	FBgn0041581	XLOC_004157	2R	FBtr0087438;FBtr0300942	64.3088	-0.180275	0.428857	-0.420361	0.674221	0.969394
AttD	FBgn0038530	XLOC_011123	3R	FBtr0083470	1.1997	0.00579257	0.274347	0.0211141	0.983155	1
att-ORFA;att-ORFB		XLOC_013275	3R	FBtr0344280;FBtr0344282;FBtr0089482;FBtr0089481;FBtr0344281;FBtr0089480	25.869	0.404412	0.470519	0.859501	0.390064	1
Atu	FBgn0019637	XLOC_010246	3R	FBtr0078704	52.8364	-0.361901	0.420388	-0.860874	0.389308	1
Atx-1	FBgn0029907	XLOC_014679	X	FBtr0299814	3.96684	-0.802924	0.424105	-1.89322	0.0583285	1
Atx2	FBgn0041188	XLOC_010956	3R	FBtr0083099;FBtr0083101;FBtr0083100;FBtr0344377	131.967	-0.253871	0.379354	-0.66922	0.503355	0.934495
Atxn7	FBgn0031420	XLOC_000231	2L	FBtr0331438;FBtr0077765;FBtr0077766;FBtr0331437	13.2612	0.0905767	0.513291	0.176463	0.85993	1
aub	FBgn0000146	XLOC_002626	2L	FBtr0112793;FBtr0080165	20.2995	-0.436307	0.50049	-0.871758	0.38334	1
aurA	FBgn0000147	XLOC_010714	3R	FBtr0082483	45.1205	-0.224933	0.437155	-0.514538	0.606876	1
aurB	FBgn0024227	XLOC_002611	2L	FBtr0080180	0.442998	0.163596	0.24015	0.681227	0.495728	1
aust	FBgn0032104	XLOC_002469	2L	FBtr0343928;FBtr0079819	7.45489	0.13253	0.46856	0.282846	0.777295	1
aux	FBgn0037218	XLOC_010160	3R	FBtr0078965;FBtr0336706;FBtr0336705;FBtr0078966	220.957	-0.13309	0.282742	-0.470713	0.637846	0.962354
ave	FBgn0050476	XLOC_004158	2R	FBtr0087439	1.36409	-0.0829374	0.282715	-0.29336	0.769247	1
Aven	FBgn0030410	XLOC_016240	X	FBtr0073709;FBtr0346122	0.631692	0.177839	0.247149	0.719562	0.471795	1
awd	FBgn0000150	XLOC_014088	3R	FBtr0346611;FBtr0339146;FBtr0346150	95.563	0.578635	0.390014	1.48363	0.137908	0.666751
Awh	FBgn0013751	XLOC_007117	3L	FBtr0330071;FBtr0330070;FBtr0073155	1.71516	0.279248	0.297091	0.93994		1
Axn	FBgn0026597	XLOC_012002	3R	FBtr0085554;FBtr0334702;FBtr0290030;FBtr0085553;FBtr0334703;FBtr0300600;FBtr0085555	22.9297	-0.105484	0.494484	-0.213321	0.831076	1
axo	FBgn0262870	XLOC_008840	3L	FBtr0306206;FBtr0333594;FBtr0333592;FBtr0302646;FBtr0333591;FBtr0306207;FBtr0333593	97.1507	-0.527327	0.38825	-1.35821	0.174396	0.712295
Axs	FBgn0000152	XLOC_016488	X	FBtr0074372	10.9612	-0.382502	0.503878	-0.759115	0.447784	1
Axud1	FBgn0261647	XLOC_000229	2L	FBtr0330665;FBtr0077763;FBtr0077762;FBtr0330666	36.2456	1.0573	0.459545	2.30076	0.0214052	1
az2	FBgn0025185	XLOC_005274	2R	FBtr0088980	8.54782	0.13932	0.484244	0.287707	0.773571	1
b	FBgn0000153	XLOC_001139	2L	FBtr0342712;FBtr0309960	15.7999	0.430791	0.509487	0.84554	0.39781	1
B4	FBgn0023407	XLOC_002787	2L	FBtr0332509;FBtr0080514;FBtr0080513	104.432	-0.224378	0.356327	-0.629698	0.528892	0.93778
B52	FBgn0004587	XLOC_010848	3R	FBtr0082803;FBtr0300588;FBtr0308196;FBtr0308197;FBtr0308195;FBtr0300586;FBtr0082802;FBtr0082801;FBtr0082806;FBtr0082804	38.8764	0.635782	0.45529	1.39643	0.162584	1
b6	FBgn0024897	XLOC_014407	X	FBtr0070272	13.3538	-0.279067	0.509675	-0.54754	0.584008	1
bab1	FBgn0004870	XLOC_008578	3L	FBtr0333269;FBtr0333270;FBtr0333268;FBtr0072642	103.421	0.920547	0.343303	2.68144	0.00733053	0.180486
bab2	FBgn0025525	XLOC_008579	3L	FBtr0333271;FBtr0072639	142.41	0.0210403	0.392482	0.0536085	0.957247	0.998087
babo	FBgn0011300	XLOC_003678	2R	FBtr0300599;FBtr0088659;FBtr0088658	14.533	-0.595679	0.513595	-1.15982	0.246121	1
babos	FBgn0034724	XLOC_006570	2R	FBtr0339539;FBtr0071845	389.352	0.0592275	0.290607	0.203806	0.838505	0.988018
Bacc	FBgn0031453	XLOC_000258	2L	FBtr0335125;FBtr0077713;FBtr0307080;FBtr0077714	257.371	-0.379415	0.295046	-1.28595	0.19846	0.745649
Bace	FBgn0032049	XLOC_002432	2L	FBtr0343427;FBtr0079701	653.452	-0.535307	0.280359	-1.90937	0.0562149	0.477194
baf	FBgn0031977	XLOC_000663	2L	FBtr0079535;FBtr0333095	9.85717	0.36585	0.506934	0.721691	0.470485	1
bai	FBgn0045866	XLOC_011643	3R	FBtr0084758	25.977	-1.02402	0.500076	-2.04772	0.040587	1
Baldspot	FBgn0260960	XLOC_009678	3L	FBtr0075355;FBtr0075356	104.196	-0.0359347	0.348056	-0.103244	0.917769	0.994122
ball	FBgn0027889	XLOC_013755	3R	FBtr0085096;FBtr0085095	5.37003	-0.149601	0.442763	-0.337879	0.735454	1
bam	FBgn0000158	XLOC_013641	3R	FBtr0084869	62.322	-0.475667	0.412202	-1.15396	0.248515	0.806148
bap	FBgn0004862	XLOC_011364	3R	FBtr0084087	1.62387	-0.0607414	0.298057	-0.203792	0.838516	1
Bap170	FBgn0042085	XLOC_003471	2R	FBtr0086107	46.1356	0.140572	0.438725	0.32041	0.748657	1
Bap55	FBgn0025716	XLOC_006081	2R	FBtr0086960	26.0273	-0.419361	0.492908	-0.850789	0.394886	1
Bap60	FBgn0025463	XLOC_016263	X	FBtr0073741	14.7867	0.183078	0.515071	0.355441	0.722259	1
barc	FBgn0037081	XLOC_010034	3L	FBtr0078400;FBtr0078399	516.787	-0.391427	0.323124	-1.21138	0.225749	0.780123
barr	FBgn0014127	XLOC_003207	2L	FBtr0081349;FBtr0081348;FBtr0343850	2.59221	-0.253452	0.341736	-0.74166	0.458293	1
baz	FBgn0000163	XLOC_015284	X	FBtr0343763;FBtr0343764;FBtr0111000;FBtr0074388	76.6371	0.00563585	0.428723	0.0131457	0.989512	0.998087
bbc	FBgn0033844	XLOC_005779	2R	FBtr0305993;FBtr0087699;FBtr0332928;FBtr0087700	102.768	-0.223871	0.354135	-0.632161	0.527282	0.93778
bbg	FBgn0087007	XLOC_009508	3L	FBtr0273425;FBtr0273424;FBtr0273428;FBtr0273426;FBtr0273423;FBtr0273427;FBtr0308596;FBtr0273422	210.375	-0.330796	0.330269	-1.0016	0.316538	0.844864
BBS1	FBgn0035741	XLOC_007312	3L	FBtr0076912	1.18057	0.000422417	0.272088	0.0015525	0.998761	1
BBS4	FBgn0033578	XLOC_003839	2R	FBtr0339487;FBtr0088202	8.69171	0.497518	0.507595	0.980146	0.327014	1
BBS8	FBgn0031255	XLOC_000089	2L	FBtr0078058	3.55597	-0.302148	0.44537	-0.678421	0.497505	1
bc10	FBgn0040239	XLOC_007223	3L	FBtr0077084	18.6338	0.688112	0.507607	1.3556	0.175227	1
BCAS2	FBgn0039558	XLOC_013830	3R	FBtr0085269	6.25142	-0.0947379	0.482322	-0.19642	0.844281	1
bcd	FBgn0000166	XLOC_012315	3R	FBtr0081666;FBtr0081668;FBtr0081667;FBtr0081665;FBtr0081664	16.2034	-0.183913	0.514273	-0.357618	0.720629	1
bchs	FBgn0043362	XLOC_000511	2L	FBtr0079144	281.405	1.1237	0.331377	3.391	0.000696386	0.0383399
BCL7-like	FBgn0026149	XLOC_014831	X	FBtr0071358	69.655	-0.27785	0.387163	-0.717657	0.472969	0.932543
bcn92	FBgn0013432	XLOC_015663	X	FBtr0070431	337.41	0.316402	0.282398	1.12041	0.262537	0.810812
Bdbt	FBgn0038857	XLOC_013327	3R	FBtr0084033	43.805	0.123689	0.46231	0.267546	0.789048	1
bdg	FBgn0034049	XLOC_005949	2R	FBtr0087299;FBtr0340017;FBtr0087300;FBtr0087298	20.5023	-0.248804	0.496835	-0.500779	0.616527	1
be	FBgn0052594	XLOC_015133	X	FBtr0310270;FBtr0073957;FBtr0073956	2794.36	-1.07033	0.319515	-3.34987	0.000808497	0.0410882
BEAF-32	FBgn0015602	XLOC_004160	2R	FBtr0087441;FBtr0305588;FBtr0087442	56.4892	-0.136311	0.434422	-0.313776	0.753691	0.975923
beag	FBgn0037660	XLOC_012495	3R	FBtr0081995	46.1257	0.726795	0.43001	1.69018	0.0909929	1
beat-Ic	FBgn0028644	XLOC_001275	2L	FBtr0343726;FBtr0080801;FBtr0343727	1.03366	0.190544	0.252882	0.753492	0.451154	1
beat-IIa	FBgn0038498	XLOC_013085	3R	FBtr0339170;FBtr0083453	1.60167	0.067793	0.299359	0.226461	0.820843	1
beat-IIb	FBgn0038494	XLOC_013081	3R	FBtr0083411;FBtr0339173	0.92109	-0.201544	0.250875	-0.803366	0.421763	1
beat-IIIc	FBgn0032629	XLOC_003012	2L	FBtr0080972;FBtr0080971	1.74115	0.0933236	0.308773	0.30224	0.762469	1
beat-Va	FBgn0038087	XLOC_012776	3R	FBtr0337093;FBtr0082688;FBtr0302367	0.674208	-0.194293	0.245566	-0.791208	0.428823	1
beat-Vc	FBgn0038084	XLOC_012773	3R	FBtr0082658	1.36409	-0.0829374	0.282715	-0.29336	0.769247	1
beat-VI	FBgn0039584	XLOC_011886	3R	FBtr0085289;FBtr0333336	1.03366	0.190544	0.252882	0.753492	0.451154	1
beat-VII	FBgn0250908	XLOC_013745	3R	FBtr0290328	1.87391	-0.117855	0.340121	-0.34651	0.728959	1
beg	FBgn0036691	XLOC_008040	3L	FBtr0075278	47.5922	0.0883663	0.414113	0.213387	0.831025	1
bel	FBgn0263231	XLOC_012460	3R	FBtr0334319;FBtr0081888	111.788	-0.13359	0.388824	-0.343575	0.731166	0.972543
Bem46	FBgn0025109	XLOC_000279	2L	FBtr0077643	49.7217	-0.0235681	0.449185	-0.0524686	0.958155	1
ben	FBgn0000173	XLOC_015086	X	FBtr0300566;FBtr0307296;FBtr0073855;FBtr0332844;FBtr0332843	28.4497	-0.745028	0.515045	-1.44653	0.148028	1
Best1	FBgn0040238	XLOC_012588	3R	FBtr0114590;FBtr0337020;FBtr0306023;FBtr0082183	20.6789	1.00092	0.504447	1.98419	0.047235	1
Best2	FBgn0035696	XLOC_008957	3L	FBtr0077010	18.4065	0.455949	0.513321	0.888234	0.374415	1
Best4	FBgn0036491	XLOC_007876	3L	FBtr0113172	4.00398	-0.514412	0.434601	-1.18364	0.236556	1
Bet1	FBgn0260857	XLOC_008163	3L	FBtr0074989;FBtr0074990	17.7712	-0.0538693	0.510458	-0.105531	0.915954	1
Bet3;Nf-YA		XLOC_009173	3L	FBtr0089879;FBtr0076504	249.098	-0.416932	0.29743	-1.40178	0.160981	0.696649
Bet5	FBgn0260860	XLOC_012016	3R	FBtr0085570	1.61614	0.333904	0.320706	1.04115	0.297805	1
beta3GalTII	FBgn0033315	XLOC_005381	2R	FBtr0088728	54.6961	0.33672	0.443519	0.7592	0.447733	1
beta4GalNAcTA	FBgn0027538	XLOC_004110	2R	FBtr0087539	56.9383	0.667011	0.439633	1.5172	0.129217	0.649752
beta4GalNAcTB	FBgn0039625	XLOC_013881	3R	FBtr0085419	29.416	-0.6376	0.471685	-1.35175	0.176455	1
beta4GalT7	FBgn0039258	XLOC_011640	3R	FBtr0084755	63.2892	-0.715569	0.407497	-1.75601	0.0790865	0.543587
betaCOP	FBgn0008635	XLOC_016603	X	FBtr0074576	77.0215	-0.0305099	0.397523	-0.0767499	0.938822	0.998087
beta'COP	FBgn0025724	XLOC_001106	2L	FBtr0080469	28.3451	0.559237	0.470013	1.18983	0.234112	1
betaggt-I	FBgn0015000	XLOC_000426	2L	FBtr0330714;FBtr0078991	104.691	0.218333	0.367333	0.594373	0.552262	0.946872
betaggt-II	FBgn0028970	XLOC_000274	2L	FBtr0077631	61.4947	-0.270356	0.406787	-0.664613	0.506298	0.934495
betaNACtes2	FBgn0030563	XLOC_016332	X	FBtr0073919	0.612556	0.176021	0.246291	0.714687	0.474802	1
betaNACtes5	FBgn0262163	XLOC_015167	X	FBtr0304150	1.18057	0.000422417	0.272088	0.0015525	0.998761	1
beta-Spec	FBgn0250788	XLOC_015303	X	FBtr0334405;FBtr0334404;FBtr0074454	459.927	-0.248758	0.334125	-0.744504	0.456571	0.932543
betaTry	FBgn0010357	XLOC_003865	2R	FBtr0345928	434.588	-0.599166	0.266737	-2.24628	0.0246863	0.335124
betaTub56D	FBgn0003887	XLOC_006227	2R	FBtr0086537;FBtr0086536	115.074	-0.3946	0.373783	-1.05569	0.291108	0.833109
betaTub60D	FBgn0003888	XLOC_005035	2R	FBtr0343443;FBtr0072270	35.5681	-0.311012	0.479296	-0.648893	0.516408	1
betaTub85D	FBgn0003889	XLOC_012513	3R	FBtr0082046	13.8026	0.151566	0.512185	0.295919	0.767292	1
betaTub97EF	FBgn0003890	XLOC_013840	3R	FBtr0334906;FBtr0300611	77.5838	-0.00509068	0.403457	-0.0126176	0.989933	0.998087
BG642312	FBgn0047334	XLOC_008953	3L	FBtr0302931;FBtr0091954	6.70179	0.0315777	0.452873	0.0697277	0.94441	1
Bgb	FBgn0013753	XLOC_006965	3L	FBtr0330180	5.04287	-0.124273	0.421072	-0.295134	0.767892	1
bgcn	FBgn0004581	XLOC_006712	2R	FBtr0344878;FBtr0072232	16.1053	0.258522	0.515358	0.501637	0.615923	1
bgm	FBgn0027348	XLOC_001156	2L	FBtr0346624;FBtr0080590	32.9584	0.50564	0.454672	1.1121	0.266096	1
BHD	FBgn0261111	XLOC_007320	3L	FBtr0076834	3962.65	0.568688	0.291327	1.95206	0.0509312	0.459061
bi	FBgn0000179	XLOC_014545	X	FBtr0070672;FBtr0331162;FBtr0343569;FBtr0300609;FBtr0308915;FBtr0308914	61.6887	-0.472566	0.45932	-1.02884	0.303556	0.841
BI-1	FBgn0035871	XLOC_009100	3L	FBtr0076712;FBtr0076711	22.3943	-0.306339	0.486359	-0.629861	0.528786	1
bib	FBgn0000180	XLOC_000832	2L	FBtr0079929	36.6309	-0.22554	0.464239	-0.485826	0.62709	1
bic	FBgn0000181	XLOC_004013	2R	FBtr0087783;FBtr0087782	491.107	0.38856	0.257238	1.51051	0.130913	0.654401
BicC	FBgn0000182	XLOC_001279	2L	FBtr0344489;FBtr0080804;FBtr0344488;FBtr0080805	11.9378	0.266725	0.304904	0.874782		1
BicD	FBgn0000183	XLOC_003027	2L	FBtr0330225;FBtr0330226;FBtr0305688	56.7307	0.0799532	0.456748	0.175049	0.861041	0.992493
bif	FBgn0014133	XLOC_014957	X	FBtr0334463;FBtr0334465;FBtr0334464;FBtr0073527;FBtr0073526	231.349	-0.113445	0.299088	-0.379302	0.704464	0.972543
BigH1	FBgn0038252	XLOC_010908	3R	FBtr0082969	28.9361	0.211084	0.50337	0.419342	0.674966	1
bigmax	FBgn0039509	XLOC_013798	3R	FBtr0085173	136.698	0.326674	0.33083	0.987438	0.323428	0.847929
Bili	FBgn0039282	XLOC_011658	3R	FBtr0302169;FBtr0302171;FBtr0302170;FBtr0302168;FBtr0301670;FBtr0345299;FBtr0302172	8.91742	-0.68822	0.487512	-1.4117	0.158039	1
bin	FBgn0045759	XLOC_007307	3L	FBtr0076900	2.0383	-0.216603	0.344102	-0.629474	0.529038	1
Bin1	FBgn0024491	XLOC_013014	3R	FBtr0083279;FBtr0347201;FBtr0347200	739.859	0.0350701	0.278667	0.12585	0.899851	0.992493
bin3	FBgn0263144	XLOC_003467	2R	FBtr0085992;FBtr0346718;FBtr0085993;FBtr0336519	243.016	-0.203583	0.286002	-0.711825	0.476573	0.932543
bip1	FBgn0026263	XLOC_009065	3L	FBtr0302329;FBtr0076745	19.9984	-0.394279	0.49722	-0.792967	0.427797	1
bip2	FBgn0026262	XLOC_014184	4	FBtr0089110	163.231	0.807429	0.319195	2.52958	0.0114199	0.222842
Bka	FBgn0010520	XLOC_000817	2L	FBtr0079874	23.4971	0.271369	0.503536	0.538926	0.589938	1
bl	FBgn0267791	XLOC_004691	2R	FBtr0086221;FBtr0301760;FBtr0086220;FBtr0086219;FBtr0336730;FBtr0086222	25.397	-0.389566	0.490891	-0.79359	0.427434	1
Blimp-1	FBgn0035625	XLOC_007227	3L	FBtr0331806;FBtr0077089;FBtr0345593;FBtr0331807;FBtr0331808;FBtr0331809	91.4819	-0.0815693	0.402028	-0.202895	0.839217	0.988018
Blm	FBgn0002906	XLOC_012687	3R	FBtr0082434	55.6656	0.333516	0.460402	0.724401	0.468819	0.932543
Blos1	FBgn0050077	XLOC_004136	2R	FBtr0301734	7.14515	-0.307436	0.509189	-0.603775	0.545993	1
Blos2	FBgn0036118	XLOC_007592	3L	FBtr0076202	227.481	-0.0438895	0.381594	-0.115016	0.908432	0.992493
Blos3	FBgn0085284	XLOC_008143	3L	FBtr0112449	8.06086	-0.712758	0.504224	-1.41357	0.157487	1
Blos4	FBgn0036105	XLOC_007578	3L	FBtr0333403;FBtr0076269	22.1526	0.825534	0.500391	1.64978	0.0989888	1
blot	FBgn0027660	XLOC_009721	3L	FBtr0075235;FBtr0339898;FBtr0075234;FBtr0075233;FBtr0075232	8.32756	0.263596	0.492205	0.535541	0.592276	1
blow	FBgn0004133	XLOC_005284	2R	FBtr0300368;FBtr0310050;FBtr0088952	217.503	-0.133775	0.287862	-0.464719	0.642132	0.962354
blp	FBgn0038387	XLOC_010991	3R	FBtr0345214;FBtr0083203	14.9323	0.378634	0.51442	0.73604	0.461706	1
blue	FBgn0041161	XLOC_009491	3L	FBtr0075781	64.0096	0.241219	0.442833	0.544718	0.585947	0.954271
blw	FBgn0011211	XLOC_004885	2R	FBtr0071883	222.861	0.154422	0.317936	0.485701	0.627179	0.958939
BM-40-SPARC	FBgn0026562	XLOC_013756	3R	FBtr0334309;FBtr0085094	19.9341	0.421743	0.49916	0.844906	0.398163	1
Bmcp	FBgn0036199	XLOC_007655	3L	FBtr0076114;FBtr0076115	4.50273	0.214631	0.436737	0.491443	0.623113	1
bmm	FBgn0036449	XLOC_009525	3L	FBtr0300190;FBtr0075699	27.2554	0.0211272	0.511793	0.0412807	0.967072	1
bnb	FBgn0001090	XLOC_016640	X	FBtr0074656;FBtr0074659;FBtr0074658;FBtr0074657	56.5579	-0.734533	0.402211	-1.82624	0.0678146	0.511059
bnk	FBgn0004389	XLOC_012074	3R	FBtr0085754	1197.51	-0.152911	0.283397	-0.539566	0.589497	0.955341
bnl	FBgn0014135	XLOC_013236	3R	FBtr0344549;FBtr0083795;FBtr0300123	17.641	-0.0717836	0.507303	-0.1415	0.887475	1
boca	FBgn0004132	XLOC_005282	2R	FBtr0088953	11.8609	-0.465267	0.510205	-0.911922	0.36181	1
bocksbeutel	FBgn0037719	XLOC_012533	3R	FBtr0100537;FBtr0082105	167.645	0.790801	0.337029	2.34639	0.0189564	0.294467
boi	FBgn0040388	XLOC_015692	X	FBtr0070458;FBtr0334883;FBtr0303887;FBtr0303886;FBtr0070457	20.4553	-0.130856	0.490948	-0.266536	0.789826	1
bol	FBgn0011206	XLOC_009153	3L	FBtr0331858;FBtr0076540;FBtr0076538;FBtr0344979;FBtr0300462;FBtr0076541;FBtr0076539	176.546	0.617347	0.386656	1.59663	0.110348	0.613591
boly	FBgn0050362	XLOC_005360	2R	FBtr0088769	9.75681	-0.0198337	0.515288	-0.0384906	0.969297	1
bon	FBgn0023097	XLOC_011301	3R	FBtr0300617;FBtr0334639;FBtr0334638;FBtr0334637;FBtr0083912	20.4858	0.505419	0.492792	1.02562	0.305069	1
bond	FBgn0260942	XLOC_011449	3R	FBtr0084261;FBtr0084262;FBtr0084263	13.7435	0.222827	0.514054	0.433469	0.664674	1
bonsai	FBgn0026261	XLOC_004864	2R	FBtr0071860	33.5515	0.0568075	0.445159	0.127612	0.898456	1
bor	FBgn0040237	XLOC_013019	3R	FBtr0083276;FBtr0305998	41.5894	0.127338	0.437821	0.290845	0.77117	1
bora	FBgn0259791	XLOC_008122	3L	FBtr0075108	13.5062	-0.83199	0.512439	-1.62359	0.104464	1
borr	FBgn0032105	XLOC_002471	2L	FBtr0079818;FBtr0079817	1.60167	0.067793	0.299359	0.226461	0.820843	1
boss	FBgn0000206	XLOC_011735	3R	FBtr0084949	0.442998	0.163596	0.24015	0.681227	0.495728	1
botv	FBgn0027535	XLOC_004559	2R	FBtr0086579	53.39	-0.337077	0.406142	-0.829948	0.406568	1
bou	FBgn0261284	XLOC_014690	X	FBtr0071004	4.97444	0.0889978	0.475285	0.187251	0.851464	1
bowl	FBgn0004893	XLOC_000352	2L	FBtr0307027;FBtr0307028;FBtr0077491;FBtr0077490;FBtr0307029;FBtr0077492;FBtr0077493	42.3205	0.220317	0.457634	0.481427	0.630213	1
BoYb	FBgn0037205	XLOC_008455	3L	FBtr0078559	11.8074	-0.403927	0.484827	-0.833137	0.404768	1
br	FBgn0000210	XLOC_014402	X	FBtr0303564;FBtr0308319;FBtr0300427;FBtr0070261;FBtr0330406;FBtr0070266;FBtr0070262;FBtr0332293;FBtr0070263;FBtr0300429;FBtr0303562;FBtr0070265;FBtr0300428;FBtr0303563	635.208	0.323041	0.267303	1.20852	0.226847	0.780575
Br140	FBgn0033155	XLOC_005252	2R	FBtr0345370;FBtr0089021	20.9785	0.483802	0.512625	0.943773	0.345286	1
brat	FBgn0010300	XLOC_001474	2L	FBtr0081158;FBtr0336627;FBtr0081159;FBtr0081160;FBtr0344846	33.4129	0.0556579	0.458825	0.121305	0.903449	1
Brca2	FBgn0050169	XLOC_005055	2R	FBtr0072302	4.44542	0.356775	0.455189	0.783795	0.43316	1
Brd	FBgn0000216	XLOC_007853	3L	FBtr0075621	2.97798	0.431485	0.351968	1.22592		1
Brd8	FBgn0039654	XLOC_011946	3R	FBtr0085394	15.1848	0.888357	0.511935	1.73529	0.0826893	1
Bre1	FBgn0086694	XLOC_008908	3L	FBtr0344538;FBtr0077116	21.3881	-0.199056	0.510429	-0.389978	0.696552	1
Brf	FBgn0038499	XLOC_013087	3R	FBtr0083452;FBtr0302317	13.764	0.597633	0.510244	1.17127	0.241491	1
brk	FBgn0024250	XLOC_014701	X	FBtr0071048	38.9488	0.0230112	0.453547	0.0507361	0.959536	1
brm	FBgn0000212	XLOC_009605	3L	FBtr0075526;FBtr0333580;FBtr0330160;FBtr0075524;FBtr0075523	49.315	-0.215744	0.424102	-0.508706	0.610958	1
Brms1	FBgn0030434	XLOC_016251	X	FBtr0073693	12.9382	0.880572	0.513743	1.71403	0.0865227	1
brn	FBgn0000221	XLOC_014529	X	FBtr0070638	12.8168	1.61302	0.513791	3.13944	0.00169271	1
Bro	FBgn0013755	XLOC_006967	3L	FBtr0072760	2.13626	0.420182	0.350355	1.1993	0.23041	1
brp	FBgn0259246	XLOC_003725	2R	FBtr0305062;FBtr0305061;FBtr0299916;FBtr0300245;FBtr0299915;FBtr0336693;FBtr0305060;FBtr0300542;FBtr0305059	72.5564	-1.28463	0.426863	-3.00946	0.00261709	0.0959788
bru	FBgn0261787	XLOC_003244	2L	FBtr0081403	92.9955	-0.208317	0.372668	-0.558987	0.576171	0.949867
bru-2	FBgn0262475	XLOC_001038	2L	FBtr0304862;FBtr0304859;FBtr0304856;FBtr0332232;FBtr0332233;FBtr0332234;FBtr0304860;FBtr0304858;FBtr0304861;FBtr0304864;FBtr0304863	58.2993	-0.129706	0.442754	-0.292952	0.769559	0.978361
bru-3	FBgn0264001	XLOC_009475	3L	FBtr0330351;FBtr0330355;FBtr0330353;FBtr0330352;FBtr0330345;FBtr0330354;FBtr0330350;FBtr0330347;FBtr0330348;FBtr0330349;FBtr0330346;FBtr0330344;FBtr0330343;FBtr0330356;FBtr0330357	16.4382	-0.0330542	0.507411	-0.0651428	0.94806	1
Bruce	FBgn0266717	XLOC_012595	3R	FBtr0331682;FBtr0331684;FBtr0331683;FBtr0331681;FBtr0082239	141.571	0.172015	0.351306	0.489645	0.624385	0.958939
brv3	FBgn0040333	XLOC_015700	X	FBtr0340092;FBtr0300708	983.687	0.321668	0.310685	1.03535	0.300506	0.83848
BRWD3	FBgn0011785	XLOC_011573	3R	FBtr0084604	196.204	0.0681767	0.305784	0.222957	0.823569	0.985388
bs	FBgn0004101	XLOC_005037	2R	FBtr0290089;FBtr0343314;FBtr0072271	10.6186	-0.268791	0.515328	-0.521592	0.601954	1
bsf	FBgn0032679	XLOC_003082	2L	FBtr0081087	73.1167	-0.0963915	0.409586	-0.235339	0.813946	0.985388
Bsg	FBgn0261822	XLOC_000669	2L	FBtr0079569;FBtr0079567;FBtr0079566;FBtr0079568;FBtr0079572;FBtr0079570;FBtr0332498;FBtr0079574;FBtr0079571;FBtr0079573	291.111	0.164571	0.301738	0.545412	0.58547	0.954271
Bsg25D	FBgn0000228	XLOC_002154	2L	FBtr0079085;FBtr0310625;FBtr0310624;FBtr0302568;FBtr0079084;FBtr0302567;FBtr0342939	33.5056	-0.347839	0.468545	-0.742382	0.457856	1
bsh	FBgn0000529	XLOC_003187	2L	FBtr0089320;FBtr0343855	95.9019	-0.470868	0.428634	-1.09853	0.271972	0.816338
bsk	FBgn0000229	XLOC_002542	2L	FBtr0300982;FBtr0302378;FBtr0080087	10.2217	0.533451	0.506589	1.05302	0.29233	1
bt	FBgn0005666	XLOC_014140	4	FBtr0301340;FBtr0089793;FBtr0334483;FBtr0344988;FBtr0334482	361.656	-0.110556	0.331077	-0.333929	0.738433	0.972543
BTBD9	FBgn0030228	XLOC_014884	X	FBtr0071497;FBtr0334456	10.9597	0.342863	0.492529	0.696128	0.486349	1
BtbVII	FBgn0263108	XLOC_007060	3L	FBtr0330149;FBtr0307301;FBtr0332096;FBtr0307306;FBtr0307302;FBtr0307304;FBtr0307305	151.034	-0.00774134	0.354233	-0.0218538	0.982565	0.998087
Btd	FBgn0029848	XLOC_015870	X	FBtr0070878	5.63404	0.198783	0.484368	0.410397	0.681514	1
BthD	FBgn0030501	XLOC_015064	X	FBtr0073806	24.5929	0.597193	0.505009	1.18254	0.236992	1
Btk29A;mir-2b-1		XLOC_002402	2L	FBtr0112836;FBtr0304201;FBtr0079618;FBtr0330692;FBtr0112835;FBtr0079615;FBtr0330693;FBtr0079617;FBtr0079616	10.7224	0.0285795	0.515217	0.0554707	0.955763	1
btn	FBgn0014949	XLOC_013423	3R	FBtr0084278	46.2496	-0.0665577	0.441199	-0.150856	0.880089	1
btsz	FBgn0266756	XLOC_012919	3R	FBtr0334292;FBtr0334291;FBtr0334285;FBtr0334290;FBtr0334293;FBtr0334289;FBtr0334288;FBtr0334287;FBtr0334286	611.974	0.280808	0.255066	1.10092	0.27093	0.816338
btv	FBgn0023096	XLOC_003056	2L	FBtr0273418	407.708	-0.31897	0.28726	-1.11039	0.266831	0.815573
btz	FBgn0045862	XLOC_011859	3R	FBtr0330084;FBtr0085220;FBtr0330085;FBtr0085221	261.255	0.056661	0.279885	0.202444	0.83957	0.98814
Bub1	FBgn0031696	XLOC_000457	2L	FBtr0346455;FBtr0079069;FBtr0342934	67.2255	-0.737189	0.407988	-1.80689	0.0707799	0.52166
Bub3	FBgn0025457	XLOC_013918	3R	FBtr0339148;FBtr0085465	3.30954	0.114743	0.383553	0.299157	0.76482	1
BubR1	FBgn0263855	XLOC_005162	2R	FBtr0086032	7.79637	0.899187	0.490741	1.8323	0.066906	1
Buffy	FBgn0040491	XLOC_003887	2R	FBtr0088077	23.5376	0.0191696	0.500344	0.0383128	0.969438	1
Bug22	FBgn0032248	XLOC_002572	2L	FBtr0080044	40.0487	0.608427	0.456297	1.3334	0.1824	1
bun	FBgn0259176	XLOC_002724	2L	FBtr0299652;FBtr0339528;FBtr0300523;FBtr0299656;FBtr0300524;FBtr0300522;FBtr0346622;FBtr0299658;FBtr0300521;FBtr0299657	250.349	0.13497	0.335375	0.402445	0.687357	0.969394
bur	FBgn0000239	XLOC_003285	2L	FBtr0343875;FBtr0301342	46.9759	0.231653	0.439623	0.526936	0.598238	1
Burs	FBgn0038901	XLOC_011384	3R	FBtr0084131	2.16534	0.0663236	0.353153	0.187804	0.85103	1
bves	FBgn0031150	XLOC_015491	X	FBtr0077246;FBtr0077247;FBtr0332846;FBtr0332845	87.3754	0.0221089	0.438386	0.0504326	0.959778	0.998087
bw	FBgn0000241	XLOC_006678	2R	FBtr0072117;FBtr0346612	141.176	0.112441	0.351914	0.319514	0.749337	0.974841
bwa	FBgn0045064	XLOC_001531	2L	FBtr0331184;FBtr0081331	59.4836	-0.00445279	0.41641	-0.0106933	0.991468	0.998087
Bx42	FBgn0004856	XLOC_016041	X	FBtr0333809;FBtr0071350	36.2726	0.453796	0.446474	1.0164	0.309439	1
by	FBgn0000244	XLOC_012523	3R	FBtr0301093;FBtr0082119;FBtr0302382	121.195	-0.169061	0.330491	-0.511545	0.608969	0.958939
byn	FBgn0011723	XLOC_007671	3L	FBtr0332071;FBtr0332070	11.285	-0.315012	0.515342	-0.611269	0.541021	1
bys	FBgn0010292	XLOC_014736	X	FBtr0071090	16.8697	-0.378984	0.500673	-0.756949	0.44908	1
Bzd	FBgn0011566	XLOC_015697	X	FBtr0070447	87.8747	0.210124	0.409329	0.513338	0.607715	0.958939
c11.1	FBgn0040236	XLOC_016064	X	FBtr0343368;FBtr0071326	454.843	0.562949	0.501905	1.12162	0.262022	0.810812
c12.1	FBgn0040235	XLOC_016065	X	FBtr0071324	12.3767	-1.10124	0.515366	-2.13682	0.0326127	1
c12.2	FBgn0040234	XLOC_014830	X	FBtr0334929;FBtr0071321	80.8826	0.14848	0.429345	0.345829	0.729471	0.972543
C15	FBgn0004863	XLOC_011370	3R	FBtr0084111	1.03366	0.190544	0.252882	0.753492	0.451154	1
C1GalTA	FBgn0032078	XLOC_002456	2L	FBtr0079790;FBtr0079789;FBtr0079788	47.8941	0.350144	0.421818	0.830083	0.406492	1
c(2)M	FBgn0028525	XLOC_001294	2L	FBtr0080830	317.8	0.222833	0.343339	0.649016	0.516328	0.93778
c(3)G	FBgn0000246	XLOC_012984	3R	FBtr0083196;FBtr0083194;FBtr0083195	3.73793	0.399461	0.408108	0.978814	0.327672	1
C3G	FBgn0259228	XLOC_015916	X	FBtr0340087;FBtr0299791;FBtr0300526;FBtr0334968;FBtr0299795;FBtr0299792;FBtr0334969;FBtr0299794;FBtr0299793;FBtr0334967	70.7834	0.121475	0.412528	0.294464	0.768403	0.978361
C901	FBgn0021742	XLOC_016146	X	FBtr0073400	2.68162	0.051486	0.372822	0.138098	0.890163	1
ca	FBgn0000247	XLOC_011981	3R	FBtr0085484;FBtr0346613	32.275	-0.856677	0.453965	-1.8871	0.059147	1
Ca-alpha1D	FBgn0001991	XLOC_001283	2L	FBtr0332023;FBtr0332024;FBtr0332022;FBtr0332021;FBtr0332025;FBtr0332020;FBtr0090005;FBtr0090004;FBtr0090006;FBtr0090003	10.0565	-0.315048	0.490062	-0.642872	0.520307	1
Ca-alpha1T	FBgn0264386	XLOC_015865	X	FBtr0334984;FBtr0304610;FBtr0304609;FBtr0112953;FBtr0089393	41.5542	0.260539	0.461998	0.56394	0.572795	1
Ca-beta	FBgn0259822	XLOC_002644	2L	FBtr0306386;FBtr0343617;FBtr0300115;FBtr0343615;FBtr0310280;FBtr0343616;FBtr0310281;FBtr0310279;FBtr0300536	55.0633	0.708401	0.483579	1.46491	0.142945	1
CaBP1	FBgn0025678	XLOC_002965	2L	FBtr0345544;FBtr0080837	35.7901	0.0447262	0.437365	0.102263	0.918548	1
cac	FBgn0263111	XLOC_016212	X	FBtr0307315;FBtr0307320;FBtr0307317;FBtr0307325;FBtr0332391;FBtr0307323;FBtr0308609;FBtr0307324;FBtr0307322;FBtr0307318;FBtr0307319;FBtr0307321;FBtr0307316;FBtr0307314;FBtr0307313	24.3796	-0.183826	0.495739	-0.370813	0.710777	1
cact	FBgn0000250	XLOC_002959	2L	FBtr0080845;FBtr0080847;FBtr0080844;FBtr0337081;FBtr0080846	65.2299	0.266981	0.388999	0.686328	0.492506	0.932543
cactin	FBgn0031114	XLOC_015465	X	FBtr0340400	29.8542	-0.694188	0.494991	-1.40243	0.160788	1
cad	FBgn0000251	XLOC_001590	2L	FBtr0335152;FBtr0081412;FBtr0081413	63.1839	0.494411	0.393395	1.25678	0.208833	0.759366
Cad86C	FBgn0261053	XLOC_010631	3R	FBtr0304664;FBtr0304666;FBtr0304665;FBtr0304663;FBtr0301933	58.9431	-0.262579	0.417797	-0.628484	0.529687	0.93778
Cad87A	FBgn0037963	XLOC_012700	3R	FBtr0082513	17.1989	0.157018	0.513607	0.305716	0.759821	1
Cad88C	FBgn0038247	XLOC_010905	3R	FBtr0344279	44.7585	-0.38916	0.45481	-0.855654	0.392189	1
Cad89D	FBgn0038439	XLOC_013038	3R	FBtr0301702	2.18445	0.0322788	0.324664	0.0994221	0.920803	1
Cad96Ca	FBgn0022800	XLOC_013637	3R	FBtr0084874	1.05555	0.229201	0.274766	0.834167	0.404187	1
Cad96Cb	FBgn0039294	XLOC_013639	3R	FBtr0339260;FBtr0302299;FBtr0301090	46.8646	-0.177764	0.457357	-0.388677	0.697515	1
Cad99C	FBgn0039709	XLOC_011984	3R	FBtr0085488;FBtr0303095	11.7261	0.374407	0.51451	0.727696	0.4668	1
CadN	FBgn0015609	XLOC_003047	2L	FBtr0100315;FBtr0100313;FBtr0081016;FBtr0081015;FBtr0100314;FBtr0100316;FBtr0081020;FBtr0081017;FBtr0081019;FBtr0081018;FBtr0081014;FBtr0081013	8.20339	-0.575041	0.49721	-1.15654	0.247462	1
CadN2	FBgn0262018	XLOC_003048	2L	FBtr0303836;FBtr0308770	5.67018	-0.240713	0.420496	-0.57245	0.567017	1
Caf1	FBgn0263979	XLOC_010930	3R	FBtr0301845;FBtr0083052	7.15471	-0.155885	0.465329	-0.335	0.737625	1
Caf1-105	FBgn0033526	XLOC_005530	2R	FBtr0088310	3.238	-0.232413	0.438787	-0.529671	0.59634	1
Caf1-180	FBgn0030054	XLOC_016021	X	FBtr0071228	115.512	-0.38289	0.498202	-0.768544	0.442164	0.922979
cag	FBgn0017414	XLOC_005557	2R	FBtr0331937;FBtr0088239	29.7819	0.0947199	0.467265	0.202711	0.839361	1
CAH1	FBgn0027844	XLOC_001136	2L	FBtr0080539	266.634	0.0801987	0.332081	0.241504	0.809165	0.985388
CAH2	FBgn0027843	XLOC_007697	3L	FBtr0333381;FBtr0076001	42.5875	-0.668131	0.434441	-1.53791	0.124071	1
CAHbeta	FBgn0037646	XLOC_010501	3R	FBtr0340014;FBtr0081958	244.686	-0.21256	0.318517	-0.667344	0.504553	0.934495
cal1	FBgn0038478	XLOC_011075	3R	FBtr0083400	462.075	0.26634	0.26921	0.98934	0.322497	0.847072
CalpA	FBgn0012051	XLOC_004588	2R	FBtr0086530;FBtr0340532;FBtr0112869;FBtr0086529	21.5439	0.613136	0.495191	1.23818	0.215649	1
CalpB	FBgn0025866	XLOC_007533	3L	FBtr0076343;FBtr0304675	94.3325	0.516505	0.364539	1.41687	0.15652	0.69517
Cals	FBgn0039928	XLOC_014210	4	FBtr0345193;FBtr0089208;FBtr0333700;FBtr0089207	38.0738	-0.0491821	0.445835	-0.110315	0.91216	1
Calx	FBgn0013995	XLOC_011334	3R	FBtr0309204;FBtr0083998;FBtr0309205;FBtr0309203;FBtr0083999;FBtr0344317;FBtr0344316;FBtr0309202;FBtr0084000	108.372	0.118359	0.373313	0.317049	0.751206	0.975362
calypso	FBgn0262166	XLOC_005974	2R	FBtr0087246;FBtr0087245	160.693	-0.0834863	0.338421	-0.246693	0.805146	0.985388
Cam;CR43900		XLOC_003938	2R	FBtr0088001;FBtr0304963;FBtr0332931;FBtr0345018;FBtr0088002;FBtr0304964	432.04	-0.0771016	0.293759	-0.262466	0.792962	0.98321
CaMKI	FBgn0016126	XLOC_014126	4	FBtr0089065;FBtr0089063;FBtr0333670;FBtr0089069;FBtr0089067	15.3553	-0.249937	0.513233	-0.486985	0.626269	1
CaMKII	FBgn0264607	XLOC_014207	4	FBtr0300378;FBtr0089219;FBtr0089218;FBtr0333674;FBtr0333675;FBtr0333673;FBtr0100147;FBtr0100148;FBtr0100146;FBtr0089217;FBtr0300379;FBtr0300377	65.7722	0.183945	0.403263	0.456142	0.648288	0.962721
Camta	FBgn0259234	XLOC_003723	2R	FBtr0301766;FBtr0339382;FBtr0300527;FBtr0299845;FBtr0299847;FBtr0299846;FBtr0339381	64.8131	0.128758	0.419513	0.306921	0.758903	0.977422
cana	FBgn0040233	XLOC_000959	2L	FBtr0091678;FBtr0344017;FBtr0344016	111.021	0.190631	0.353209	0.539711	0.589396	0.955341
CanA1	FBgn0010015	XLOC_012068	3R	FBtr0334546;FBtr0304582;FBtr0085732	2.06687	0.01556	0.344991	0.0451025	0.964026	1
CanA-14F	FBgn0030758	XLOC_016477	X	FBtr0305198;FBtr0074293;FBtr0332870;FBtr0074292	79.1768	-0.0764952	0.410635	-0.186285	0.852221	0.992131
CanB	FBgn0010014	XLOC_014580	X	FBtr0308348;FBtr0070764	1.68552	-0.301055	0.298355	-1.00905	0.312952	1
CanB2	FBgn0015614	XLOC_003569	2R	FBtr0088930;FBtr0309866	29.6621	-0.10169	0.497983	-0.204204	0.838194	1
Cand1	FBgn0027568	XLOC_002563	2L	FBtr0332198;FBtr0080054	15.1003	0.0439542	0.51536	0.0852883	0.932032	1
Ca-P60A	FBgn0263006	XLOC_006724	2R	FBtr0343281;FBtr0072215;FBtr0072216;FBtr0072218;FBtr0072217;FBtr0072214;FBtr0072213;FBtr0072212;FBtr0072211	354.514	0.0549048	0.270043	0.203319	0.838886	0.988018
Capa	FBgn0039722	XLOC_013945	3R	FBtr0085514	3.8159	0.204925	0.403473	0.507904	0.611521	1
CapaR	FBgn0037100	XLOC_010048	3L	FBtr0333458;FBtr0078379	1.67061	0.0801043	0.303857	0.263625	0.792069	1
Cap-D2	FBgn0039680	XLOC_011964	3R	FBtr0085452	3.41293	-0.866455	0.433283	-1.99975	0.0455277	1
Cap-D3	FBgn0051989	XLOC_000473	2L	FBtr0301318;FBtr0079097	3.91888	-0.09456	0.43095	-0.219422	0.826321	1
Caper;milt		XLOC_000605	2L	FBtr0344709;FBtr0344712;FBtr0344710;FBtr0344708;FBtr0089640;FBtr0344711;FBtr0089636;FBtr0306228;FBtr0306229;FBtr0306233;FBtr0306231;FBtr0306232;FBtr0306230	542.633	-0.680424	0.263154	-2.58565	0.00971969	0.198623
Cap-G	FBgn0259876	XLOC_004027	2R	FBtr0301325;FBtr0299507	40.7175	0.738609	0.45214	1.63359	0.102346	1
Cap-H2	FBgn0037831	XLOC_010625	3R	FBtr0302571;FBtr0301311;FBtr0301310;FBtr0082273	66.132	0.0438761	0.421128	0.104187	0.917021	0.994004
Capr	FBgn0042134	XLOC_009805	3L	FBtr0075098;FBtr0345806	138.648	-0.295795	0.345755	-0.855505	0.392272	0.896232
caps	FBgn0023095	XLOC_007772	3L	FBtr0075833;FBtr0075832	50.9611	0.374384	0.449955	0.832049	0.405381	1
Caps	FBgn0053653	XLOC_014160	4	FBtr0333702;FBtr0307334;FBtr0307333;FBtr0091631;FBtr0091630	7.92991	-0.0973371	0.463628	-0.209946	0.83371	1
capt	FBgn0261458	XLOC_001838	2L	FBtr0332274;FBtr0100023;FBtr0100022	83.9496	-0.468401	0.398846	-1.17439	0.240239	0.79425
capu	FBgn0000256	XLOC_002065	2L	FBtr0290079;FBtr0077513;FBtr0077512;FBtr0290081;FBtr0290080;FBtr0077511;FBtr0290082;FBtr0290078;FBtr0290077	54.4986	0.624453	0.453405	1.37725	0.168434	1
car	FBgn0000257	XLOC_015411	X	FBtr0074727;FBtr0074728	22.3313	-0.148592	0.489371	-0.303639	0.761403	1
cas	FBgn0004878	XLOC_012255	3R	FBtr0339518;FBtr0078725	4.31621	0.225324	0.459815	0.490033	0.624111	1
Cas	FBgn0022213	XLOC_002992	2L	FBtr0080930	86.0087	0.0501226	0.40541	0.123634	0.901605	0.992493
CASK;CRG		XLOC_013369	3R	FBtr0301327;FBtr0343762;FBtr0084162;FBtr0301328;FBtr0112873;FBtr0112872;FBtr0330368	31.7225	0.231759	0.480424	0.482406	0.629518	1
casp	FBgn0034068	XLOC_005961	2R	FBtr0339756;FBtr0087259;FBtr0087260	47.4169	0.133435	0.420926	0.317004	0.751241	1
Cat	FBgn0000261	XLOC_008135	3L	FBtr0075058	95.3037	-0.0685467	0.419412	-0.163435	0.870176	0.992493
cathD	FBgn0029093	XLOC_005305	2R	FBtr0088898	78.4868	-0.284204	0.416091	-0.683033	0.494586	0.932543
cato	FBgn0024249	XLOC_005987	2R	FBtr0087183	2.05711	-0.466273	0.353542	-1.31886	0.187215	1
Catsup	FBgn0002022	XLOC_001460	2L	FBtr0081143	84.1855	0.444016	0.360763	1.23077	0.21841	0.769922
caup	FBgn0015919	XLOC_007724	3L	FBtr0075909	14.113	-0.333421	0.510244	-0.653454	0.513464	1
cav	FBgn0026257	XLOC_011561	3R	FBtr0084557;FBtr0084556;FBtr0084558;FBtr0084559	309.788	-0.0760609	0.28958	-0.262659	0.792813	0.98321
caz	FBgn0011571	XLOC_015228	X	FBtr0334991;FBtr0334992;FBtr0334990;FBtr0074217	16.7069	-0.0313457	0.511937	-0.0612296	0.951176	1
cbc	FBgn0033842	XLOC_005778	2R	FBtr0087701	2.23336	0.191972	0.361434	0.531138	0.595323	1
Cbl	FBgn0020224	XLOC_007409	3L	FBtr0076614;FBtr0076615	233.226	0.111952	0.415335	0.269546	0.787509	0.981971
CBP	FBgn0026144	XLOC_014704	X	FBtr0071052;FBtr0071053	9.82904	0.164396	0.285648	0.575519	0.56494	1
Cbp20	FBgn0022943	XLOC_011158	3R	FBtr0083551	95.8162	0.0376884	0.371632	0.101413	0.919222	0.994122
Cbp53E	FBgn0004580	XLOC_004339	2R	FBtr0340072;FBtr0087056	45.1272	-0.656016	0.50366	-1.3025	0.192746	1
Cbp80	FBgn0022942	XLOC_014555	X	FBtr0070683;FBtr0070684	6.78754	0.0644443	0.482105	0.133673	0.893661	1
cbs	FBgn0086757	XLOC_004056	2R	FBtr0309887;FBtr0309886;FBtr0087666	12.3611	0.842439	0.513458	1.64072	0.100856	1
Cbs	FBgn0031148	XLOC_015490	X	FBtr0077244;FBtr0340437;FBtr0077245	33.6256	0.106188	0.474694	0.223699	0.822992	1
cbt	FBgn0043364	XLOC_001800	2L	FBtr0310030;FBtr0078084;FBtr0078083	67.8263	-0.213917	0.397334	-0.538381	0.590314	0.955773
cbx	FBgn0011241	XLOC_005477	2R	FBtr0088453;FBtr0332915;FBtr0088452	31.1781	0.425762	0.477649	0.891369	0.372731	1
Cby	FBgn0067317	XLOC_011390	3R	FBtr0336880;FBtr0336879	2.61268	0.0348084	0.341764	0.101849	0.918876	1
CCAP	FBgn0039007	XLOC_013428	3R	FBtr0335007;FBtr0084333	15.4406	0.194722	0.515361	0.377836	0.705552	1
CCAP-R	FBgn0039396	XLOC_013708	3R	FBtr0304043	28.8718	0.529127	0.509427	1.03867	0.298958	1
CCDC151	FBgn0036219	XLOC_007668	3L	FBtr0076037	3.26737	0.186784	0.359281	0.519883		1
CCHa1	FBgn0038199	XLOC_012859	3R	FBtr0113232	22.1409	-0.252892	0.488658	-0.517523	0.604791	1
CCHa1-R	FBgn0050106	XLOC_006106	2R	FBtr0086893	2.19157	-0.0305689	0.35481	-0.0861559	0.931343	1
CCHa2	FBgn0038147	XLOC_012813	3R	FBtr0303263;FBtr0303262;FBtr0082762	10.5369	-0.925292	0.515267	-1.79575	0.0725342	1
CCHa2-R	FBgn0033058	XLOC_003448	2R	FBtr0301687;FBtr0085975	2.72617	0.260749	0.37664	0.692303	0.488747	1
Cchl	FBgn0038925	XLOC_013386	3R	FBtr0335198;FBtr0084185	18.5623	0.398831	0.498072	0.800751	0.423276	1
Ccm3	FBgn0038331	XLOC_010953	3R	FBtr0083094	59.5063	0.552963	0.417914	1.32315	0.185785	0.717091
Ccn	FBgn0052183	XLOC_008076	3L	FBtr0075186	0.56801	-0.194549	0.245753	-0.791644	0.428568	1
Ccs	FBgn0010531	XLOC_005502	2R	FBtr0333068;FBtr0300944	36.504	-0.501276	0.444912	-1.12669	0.259875	1
Cct1;Cct2		XLOC_006957	3L	FBtr0333396;FBtr0072738;FBtr0345365;FBtr0072739;FBtr0072740;FBtr0072741;FBtr0072742	114.945	-0.105367	0.34849	-0.302351	0.762384	0.977649
Cct5	FBgn0010621	XLOC_003925	2R	FBtr0087987;FBtr0087988	76.9959	-0.186738	0.370081	-0.504588	0.613848	0.958939
Cctgamma	FBgn0015019	XLOC_011052	3R	FBtr0302370;FBtr0302371;FBtr0083338;FBtr0083337	96.1547	0.1624	0.402979	0.403	0.686948	0.969394
Ccz1	FBgn0035470	XLOC_008773	3L	FBtr0073180	112.337	0.196996	0.36164	0.544731	0.585939	0.954271
cd	FBgn0263986	XLOC_011462	3R	FBtr0084303	9.0555	0.19934	0.506027	0.393931	0.693632	1
CD98hc	FBgn0037533	XLOC_012404	3R	FBtr0331344;FBtr0081824;FBtr0332157;FBtr0331342	71.3797	0.402777	0.392457	1.0263	0.304752	0.842218
Cda5	FBgn0051973	XLOC_001763	2L	FBtr0113416;FBtr0309227;FBtr0309229;FBtr0309228;FBtr0309225;FBtr0078164;FBtr0078163;FBtr0309226	1106.27	-0.105878	0.257645	-0.410946	0.681112	0.969394
Cda9	FBgn0034197	XLOC_004354	2R	FBtr0340127;FBtr0086984	4.49011	0.117324	0.436555	0.268749	0.788123	1
CDase	FBgn0039774	XLOC_012032	3R	FBtr0331357;FBtr0085645;FBtr0085649;FBtr0085648;FBtr0085647;FBtr0085646	39.7433	0.574435	0.484171	1.18643	0.235453	1
cdc14	FBgn0031952	XLOC_002356	2L	FBtr0343423;FBtr0301331;FBtr0301330;FBtr0079492;FBtr0343424	181.377	-0.00225489	0.331507	-0.00680194	0.994573	0.998087
Cdc16;CG6763		XLOC_011495	3R	FBtr0084377;FBtr0084378;FBtr0334497	5.00757	-0.294642	0.467412	-0.630369	0.528453	1
Cdc23	FBgn0032863	XLOC_001561	2L	FBtr0332969;FBtr0081362	17.891	0.200811	0.514677	0.390168	0.696412	1
Cdc27	FBgn0012058	XLOC_009012	3L	FBtr0333369;FBtr0076890	17.6041	-0.256275	0.502713	-0.509784	0.610203	1
cdc2rk	FBgn0013435	XLOC_005497	2R	FBtr0088429	125.393	0.538178	0.394494	1.36423	0.172496	0.712266
Cdc37;CG12020		XLOC_006981	3L	FBtr0072777;FBtr0072778	20.316	0.491997	0.509034	0.96653	0.333779	1
Cdc42	FBgn0010341	XLOC_015425	X	FBtr0074751;FBtr0309215;FBtr0309214	74.5774	-0.573463	0.38486	-1.49006	0.136209	0.665213
CDC45L	FBgn0026143	XLOC_015601	X	FBtr0070182	28.7519	-0.220828	0.46877	-0.471079	0.637584	1
Cdc5	FBgn0265574	XLOC_008533	3L	FBtr0300727;FBtr0072569	24.3515	0.0855329	0.497242	0.172015	0.863426	1
Cdc6	FBgn0035918	XLOC_009122	3L	FBtr0076647	122.824	-0.323237	0.401943	-0.804187	0.421289	0.913587
Cdep	FBgn0265082	XLOC_010208	3R	FBtr0336810;FBtr0336812;FBtr0336811;FBtr0336809	106.69	0.011443	0.412666	0.0277294	0.977878	0.998087
CdGAPr	FBgn0032821	XLOC_003188	2L	FBtr0332179;FBtr0081318;FBtr0300967;FBtr0300966	25.8823	0.498323	0.515363	0.966936		1
cdi	FBgn0004876	XLOC_013201	3R	FBtr0305321;FBtr0083716	143.642	-0.155975	0.351302	-0.443993	0.657048	0.963487
Cdk1	FBgn0004106	XLOC_002565	2L	FBtr0080051	378.132	0.539113	0.294715	1.82927	0.0673596	0.510542
Cdk12	FBgn0037093	XLOC_008343	3L	FBtr0078357;FBtr0332716;FBtr0078358	47.4782	0.377961	0.435233	0.868412	0.385169	1
Cdk2	FBgn0004107	XLOC_011310	3R	FBtr0083922;FBtr0083921;FBtr0300447	10.9822	0.72242	0.513601	1.40658	0.159553	1
Cdk4	FBgn0016131	XLOC_004294	2R	FBtr0087102;FBtr0087103;FBtr0345340;FBtr0087104;FBtr0340063	23.8568	1.12761	0.509045	2.21515	0.0267495	1
Cdk5	FBgn0013762	XLOC_005930	2R	FBtr0087350	15.9127	-0.104114	0.508369	-0.204801	0.837728	1
Cdk5alpha	FBgn0027491	XLOC_002555	2L	FBtr0080063;FBtr0331670	1.67061	0.0801043	0.303857	0.263625	0.792069	1
Cdk7	FBgn0263237	XLOC_015811	X	FBtr0070756	3.79708	0.37199	0.401634	0.926192	0.354346	1
Cdk8	FBgn0015618	XLOC_009206	3L	FBtr0076369	2.66224	-0.0510516	0.370958	-0.137621	0.89054	1
Cdk9	FBgn0019949	XLOC_006585	2R	FBtr0071937	1.62356	0.0848322	0.327501	0.259029	0.795613	1
cdm	FBgn0261532	XLOC_013137	3R	FBtr0336472;FBtr0083619	483.367	-0.0520702	0.294094	-0.177053	0.859467	0.992493
CdsA	FBgn0010350	XLOC_007377	3L	FBtr0346546;FBtr0076688	71.8538	0.053855	0.392791	0.137109	0.890945	0.992493
CecA1	FBgn0000276	XLOC_012018	3R	FBtr0085612	0.674208	-0.194293	0.245566	-0.791208	0.428823	1
CecC	FBgn0000279	XLOC_012022	3R	FBtr0085616	0.92109	-0.201544	0.250875	-0.803366	0.421763	1
Ced-12	FBgn0032409	XLOC_001024	2L	FBtr0080330	5.22669	-0.341977	0.447786	-0.763707	0.445042	1
ced-6	FBgn0029092	XLOC_005446	2R	FBtr0088550;FBtr0339384;FBtr0088549;FBtr0088548;FBtr0306808	98.9333	1.17985	0.399004	2.957	0.0031065	0.105104
Cen	FBgn0032876	XLOC_003246	2L	FBtr0081401;FBtr0081399	42.2693	0.214338	0.46196	0.463975	0.642666	1
CenB1A	FBgn0039056	XLOC_011491	3R	FBtr0084368;FBtr0084369	114.37	0.0331095	0.352936	0.0938115	0.925259	0.994503
CenG1A	FBgn0028509	XLOC_001142	2L	FBtr0080546;FBtr0080547;FBtr0080548	120.722	-0.0529127	0.349281	-0.15149	0.879589	0.992493
Cenp-C	FBgn0266916	XLOC_010473	3R	FBtr0339328;FBtr0089973	11.0952	-0.0330628	0.504182	-0.0655771	0.947715	1
Cep135	FBgn0036480	XLOC_007865	3L	FBtr0333853;FBtr0303375;FBtr0075638	4.53144	0.0113552	0.469702	0.0241754	0.980713	1
Cep89	FBgn0266708	XLOC_005937	2R	FBtr0087320	23.1118	-0.40142	0.515329	-0.778959	0.436004	1
Cep97	FBgn0031575	XLOC_000363	2L	FBtr0077504;FBtr0301082	69.1347	0.0267171	0.467957	0.0570932	0.954471	0.998087
cer	FBgn0034443	XLOC_006222	2R	FBtr0086551	19.0851	-0.230208	0.505724	-0.455204	0.648962	1
Cerk	FBgn0037315	XLOC_012210	3R	FBtr0078804;FBtr0078803	15.405	0.705201	0.515366	1.36835	0.171202	1
cert	FBgn0027569	XLOC_009095	3L	FBtr0332136;FBtr0345035;FBtr0076717	30.25	-0.121467	0.468421	-0.259311	0.795395	1
cerv	FBgn0030657	XLOC_016403	X	FBtr0310052;FBtr0089702;FBtr0346182	1.87391	-0.117855	0.340121	-0.34651	0.728959	1
Cf2	FBgn0000286	XLOC_002119	2L	FBtr0304887;FBtr0336835;FBtr0089649;FBtr0089648;FBtr0089647	39.3963	-0.134356	0.462321	-0.290613	0.771348	1
Cfp1	FBgn0030121	XLOC_016063	X	FBtr0302964;FBtr0071327	9.37986	0.0689216	0.515232	0.133768	0.893586	1
cg	FBgn0000289	XLOC_004103	2R	FBtr0087528;FBtr0290034;FBtr0339962;FBtr0339960;FBtr0087529;FBtr0087527;FBtr0087526;FBtr0346946;FBtr0339961;FBtr0290035;FBtr0112795	52.1888	0.00700916	0.431027	0.0162615	0.987026	1
CG10000	FBgn0039596	XLOC_013865	3R	FBtr0085315	2.7453	0.327248	0.41203	0.794232	0.42706	1
CG10005	FBgn0037972	XLOC_012705	3R	FBtr0335438;FBtr0082507	29.9126	0.028035	0.496394	0.0564774	0.954961	1
CG10011	FBgn0039590	XLOC_013861	3R	FBtr0085319	141.569	0.184197	0.343535	0.536182	0.591833	0.955773
CG10013	FBgn0038012	XLOC_010743	3R	FBtr0082567	1.07469	0.234959	0.277667	0.846188	0.397448	1
CG10019	FBgn0031568	XLOC_000348	2L	FBtr0321291;FBtr0273188	0.56801	-0.194549	0.245753	-0.791644	0.428568	1
CG10026	FBgn0032785	XLOC_001493	2L	FBtr0081236;FBtr0332317;FBtr0081238;FBtr0081237	9.51157	0.312388	0.509444	0.613194	0.539748	1
CG10031	FBgn0031563	XLOC_002052	2L	FBtr0077544	1.5456	0.318126	0.314606	1.01119	0.311926	1
CG10032	FBgn0037493	XLOC_010382	3R	FBtr0081579	3.10053	0.174051	0.382186	0.455408	0.648816	1
CG10035	FBgn0038028	XLOC_012739	3R	FBtr0344387;FBtr0082606	1.1997	0.00579257	0.274347	0.0211141	0.983155	1
CG10038	FBgn0038013	XLOC_012732	3R	FBtr0082615;FBtr0082614	1.72976	0.0806299	0.329871	0.244429	0.806899	1
CG10050	FBgn0037492	XLOC_010379	3R	FBtr0081577	0.442998	0.163596	0.24015	0.681227	0.495728	1
CG10051	FBgn0034437	XLOC_004578	2R	FBtr0086521	18.3124	0.653692	0.512337	1.2759	0.20199	1
CG10053	FBgn0037490	XLOC_010378	3R	FBtr0339734;FBtr0081576	1.13602	-0.221131	0.261966	-0.844122	0.398601	1
CG10055	FBgn0037482	XLOC_012346	3R	FBtr0081605	11.852	0.0657872	0.515098	0.127718	0.898372	1
CG10062	FBgn0034439	XLOC_004579	2R	FBtr0334005;FBtr0086522;FBtr0334006	7.82965	-0.608457	0.512537	-1.18715	0.235169	1
CG10063	FBgn0035727	XLOC_008994	3L	FBtr0076935	222.232	-0.382887	0.297989	-1.2849	0.198827	0.745649
CG10064	FBgn0035724	XLOC_008992	3L	FBtr0076937	5.91818	0.125058	0.477179	0.262077	0.793262	1
CG10068	FBgn0037473	XLOC_012340	3R	FBtr0081611	125.597	0.202819	0.409175	0.495678	0.620122	0.958939
CG10073	FBgn0034440	XLOC_004580	2R	FBtr0310321;FBtr0086523	1.36409	-0.0829374	0.282715	-0.29336	0.769247	1
CG10075	FBgn0035722	XLOC_008990	3L	FBtr0076939	39.1054	-0.0291326	0.448519	-0.0649528	0.948212	1
CG10077	FBgn0035720	XLOC_008989	3L	FBtr0333083;FBtr0076940;FBtr0300937	75.5894	0.106974	0.427804	0.250053	0.802546	0.984979
CG10081	FBgn0034441	XLOC_004581	2R	FBtr0334007;FBtr0086524	2.2068	0.437478	0.355653	1.23007	0.218671	1
CG10082	FBgn0034644	XLOC_004785	2R	FBtr0071661;FBtr0071662	81.2839	0.332987	0.377373	0.882384	0.377569	0.8868
CG10086	FBgn0037517	XLOC_010410	3R	FBtr0081744	38.6279	0.0957449	0.479349	0.199739	0.841685	1
CG10089	FBgn0036369	XLOC_009471	3L	FBtr0331535;FBtr0075820;FBtr0345364;FBtr0075823;FBtr0075822;FBtr0075821	7.89751	-0.33513	0.491192	-0.68228	0.495062	1
CG10092	FBgn0037526	XLOC_010414	3R	FBtr0081752;FBtr0333826	931.517	0.00941548	0.277196	0.0339668	0.972904	0.998087
CG10096;CG10097		XLOC_012740	3R	FBtr0347003;FBtr0347002;FBtr0082604;FBtr0344386;FBtr0100525	23.7074	1.11345	0.509851	2.18388	0.028971	1
CG10098	FBgn0037472	XLOC_010364	3R	FBtr0081563	63.3889	0.143019	0.416027	0.343774	0.731016	0.972543
CG10103	FBgn0035715	XLOC_008980	3L	FBtr0330062;FBtr0330064;FBtr0330063;FBtr0330061;FBtr0076949;FBtr0330065	48.377	0.0959834	0.43204	0.222163	0.824187	1
CG10104	FBgn0033933	XLOC_004125	2R	FBtr0087486	1.28676	-0.00592986	0.277179	-0.0213936	0.982932	1
CG10116	FBgn0036367	XLOC_009470	3L	FBtr0075824	20.3285	-0.206665	0.489901	-0.42185	0.673134	1
CG10126	FBgn0038088	XLOC_012779	3R	FBtr0082686;FBtr0082687	9.18444	0.946389	0.50306	1.88126	0.0599359	1
CG10132	FBgn0032798	XLOC_001501	2L	FBtr0081247;FBtr0343771	161.159	0.17069	0.32525	0.524794	0.599726	0.957465
CG10133	FBgn0036366	XLOC_009469	3L	FBtr0075825	15.8451	-0.193422	0.505111	-0.382929	0.701773	1
CG10137	FBgn0032800	XLOC_001502	2L	FBtr0081248	197.358	-0.233725	0.321741	-0.726439	0.46757	0.932543
CG10139	FBgn0033951	XLOC_004153	2R	FBtr0087433;FBtr0339980	4.72911	-0.0426626	0.488456	-0.0873416	0.9304	1
CG10140	FBgn0036363	XLOC_009468	3L	FBtr0075853	3.28689	-0.058844	0.384909	-0.152877	0.878495	1
CG10144	FBgn0035704	XLOC_008967	3L	FBtr0076986	6.60414	-0.047405	0.433436	-0.10937	0.912909	1
CG10147	FBgn0035702	XLOC_008966	3L	FBtr0333060;FBtr0076987	21.098	-1.10828	0.509063	-2.1771	0.0294731	1
CG10151	FBgn0033960	XLOC_005866	2R	FBtr0087473;FBtr0289934;FBtr0087472;FBtr0087471	6.14025	-0.0900676	0.476794	-0.188902	0.850169	1
CG10154	FBgn0036361	XLOC_009467	3L	FBtr0075854;FBtr0303093	0.442998	0.163596	0.24015	0.681227	0.495728	1
CG10163	FBgn0035697	XLOC_008958	3L	FBtr0077009	0.92109	-0.201544	0.250875	-0.803366	0.421763	1
CG10164	FBgn0039088	XLOC_013497	3R	FBtr0300585;FBtr0084417	0.92109	-0.201544	0.250875	-0.803366	0.421763	1
CG10165	FBgn0032801	XLOC_003170	2L	FBtr0303779;FBtr0344843;FBtr0303780;FBtr0081278;FBtr0081277	85.8141	0.068587	0.360943	0.190022	0.849292	0.991305
CG10166	FBgn0032799	XLOC_003169	2L	FBtr0081279	10.614	-0.246635	0.498907	-0.49435	0.621059	1
CG10168	FBgn0039087	XLOC_013496	3R	FBtr0084418	4.68122	0.128077	0.435679	0.293972	0.768779	1
CG10170	FBgn0039085	XLOC_013494	3R	FBtr0084420	26.5724	0.126686	0.469787	0.269666	0.787417	1
CG10171	FBgn0036353	XLOC_009457	3L	FBtr0075865;FBtr0075864	3.14979	0.262643	0.416689	0.630309	0.528492	1
CG10175	FBgn0039084	XLOC_013493	3R	FBtr0344701;FBtr0339621;FBtr0084423;FBtr0084422;FBtr0084421	3.75088	-0.24884	0.398727	-0.624085	0.532572	1
CG10176	FBgn0032682	XLOC_001420	2L	FBtr0300674;FBtr0332321	46.142	-0.0568719	0.432661	-0.131447	0.895422	1
CG10177	FBgn0039083	XLOC_013492	3R	FBtr0084424	33.7317	0.268596	0.464797	0.577879	0.563346	1
CG10178	FBgn0032684	XLOC_001421	2L	FBtr0081068;FBtr0305619	7.55012	-0.632491	0.496297	-1.27442	0.202514	1
CG10182	FBgn0039091	XLOC_013498	3R	FBtr0084486	16.5625	-0.443627	0.50956	-0.870606	0.383969	1
CG10183	FBgn0039093	XLOC_013501	3R	FBtr0273191	22.8619	-1.50599	0.502073	-2.99955	0.00270377	1
CG10184	FBgn0039094	XLOC_013503	3R	FBtr0084481	8.23311	-0.268801	0.513497	-0.523471	0.600647	1
CG10185	FBgn0038397	XLOC_013008	3R	FBtr0083235	162.799	0.318378	0.303243	1.04991	0.29376	0.833109
CG10186	FBgn0032797	XLOC_003167	2L	FBtr0302108;FBtr0302107;FBtr0081280;FBtr0081281;FBtr0299519	6.86387	0.199344	0.488371	0.408182	0.68314	1
CG10188	FBgn0032796	XLOC_003166	2L	FBtr0329963;FBtr0081283;FBtr0081282	76.432	0.175318	0.371672	0.471701	0.63714	0.962354
CG10189	FBgn0032793	XLOC_003165	2L	FBtr0081284;FBtr0331327	16.6007	-0.64668	0.512421	-1.26201	0.206945	1
CG10194	FBgn0032790	XLOC_003164	2L	FBtr0081285	15.5097	0.18821	0.509817	0.369171	0.712	1
CG10195	FBgn0032787	XLOC_003163	2L	FBtr0332318;FBtr0302930	4.02312	-0.506104	0.436235	-1.16016	0.245982	1
CG10205	FBgn0033970	XLOC_004162	2R	FBtr0087447;FBtr0087446	0.631692	0.177839	0.247149	0.719562	0.471795	1
CG10208	FBgn0039118	XLOC_013521	3R	FBtr0084461	4.62419	0.974897	0.458216	2.12759	0.0333708	1
CG10209	FBgn0033971	XLOC_005875	2R	FBtr0087462	36.3719	0.231312	0.452012	0.511738	0.608835	1
CG10211	FBgn0032685	XLOC_001422	2L	FBtr0081069;FBtr0343824	146.72	-0.273657	0.376711	-0.726438	0.46757	0.932543
CG10214	FBgn0039115	XLOC_013519	3R	FBtr0084463	355.518	0.753829	0.326114	2.31155	0.0208027	0.307822
CG10217	FBgn0039113	XLOC_013518	3R	FBtr0084465;FBtr0084464	37.7222	-0.097151	0.456479	-0.212827	0.831462	1
CG10219	FBgn0039112	XLOC_013517	3R	FBtr0084466	137.408	-0.125287	0.356262	-0.351671	0.725085	0.972543
CG10222	FBgn0036356	XLOC_009460	3L	FBtr0345341;FBtr0075861	0.442998	0.163596	0.24015	0.681227	0.495728	1
CG10226	FBgn0035695	XLOC_008955	3L	FBtr0332068;FBtr0077012	39.3826	0.666192	0.46353	1.43721	0.150657	1
CG10232	FBgn0039108	XLOC_013511	3R	FBtr0345300	1.28676	-0.00592986	0.277179	-0.0213936	0.982932	1
CG10237	FBgn0032783	XLOC_003158	2L	FBtr0334176;FBtr0081209;FBtr0081208;FBtr0081207;FBtr0308679	82.3496	0.289679	0.368009	0.78715	0.431194	0.914193
CG1024	FBgn0027514	XLOC_012291	3R	FBtr0332176;FBtr0332175;FBtr0290212	4.02162	0.0332457	0.424727	0.0782754	0.937609	1
CG10249	FBgn0027596	XLOC_005884	2R	FBtr0303758;FBtr0301334;FBtr0087431;FBtr0332856;FBtr0303756;FBtr0087430;FBtr0087429;FBtr0112929;FBtr0303757	597.482	0.324044	0.296299	1.09364	0.274114	0.817144
CG10253	FBgn0033983	XLOC_005885	2R	FBtr0303760;FBtr0087428;FBtr0303762;FBtr0303761	20.2492	-0.187807	0.494726	-0.379619	0.704228	1
CG10254	FBgn0027512	XLOC_013505	3R	FBtr0334770;FBtr0084477;FBtr0084476	17.9482	0.904097	0.510887	1.76966	0.0767832	1
CG10257	FBgn0033985	XLOC_004173	2R	FBtr0087408	128.324	-0.119184	0.354281	-0.33641	0.736562	0.972543
CG10262	FBgn0032813	XLOC_003178	2L	FBtr0081262	1.57932	-0.367489	0.322567	-1.13927	0.254592	1
CG10264	FBgn0038394	XLOC_010999	3R	FBtr0083222	15.2705	0.67881	0.514446	1.3195	0.187003	1
CG10265	FBgn0033990	XLOC_005889	2R	FBtr0332259;FBtr0087421	1.1026	0.192537	0.253764	0.758724	0.448017	1
CG10268	FBgn0032811	XLOC_003176	2L	FBtr0081266	7.31099	0.63851	0.491951	1.29791	0.194317	1
CG10274	FBgn0035690	XLOC_008947	3L	FBtr0113149	19.902	-0.0890966	0.495697	-0.17974	0.857357	1
CG10280	FBgn0037395	XLOC_012273	3R	FBtr0309318;FBtr0078648	2.10835	0.41808	0.349732	1.19543	0.23192	1
CG10283	FBgn0032681	XLOC_003083	2L	FBtr0081086;FBtr0081085;FBtr0300676;FBtr0300675	83.8914	0.154848	0.371887	0.416386	0.677128	0.969394
CG10286	FBgn0037439	XLOC_010317	3R	FBtr0081717	55.7309	-0.174278	0.441283	-0.394934	0.692891	0.969394
CG10289	FBgn0035688	XLOC_008946	3L	FBtr0331790;FBtr0077019;FBtr0331791;FBtr0331789	62.0098	0.0437284	0.446483	0.0979396	0.92198	0.994125
CG10298	FBgn0037432	XLOC_010312	3R	FBtr0081710	16.1944	-0.317604	0.515365	-0.61627	0.537716	1
CG10300	FBgn0039107	XLOC_011518	3R	FBtr0084445	1.61614	0.333904	0.320706	1.04115	0.297805	1
CG10301	FBgn0039106	XLOC_011517	3R	FBtr0114504	0.612556	0.176021	0.246291	0.714687	0.474802	1
CG10306	FBgn0034654	XLOC_004793	2R	FBtr0071670	61.2488	0.0246642	0.415432	0.0593702	0.952657	0.998087
CG10307	FBgn0034655	XLOC_004794	2R	FBtr0071671;FBtr0345486	546.151	0.458222	0.281879	1.6256	0.104035	0.594042
CG10311	FBgn0038420	XLOC_013023	3R	FBtr0345202;FBtr0083324	32.9986	-0.134374	0.495114	-0.271401	0.786083	1
CG10320	FBgn0034645	XLOC_004786	2R	FBtr0300680;FBtr0113101;FBtr0300679;FBtr0113102;FBtr0071663	106.443	-0.18871	0.354887	-0.531748	0.594901	0.95673
CG10321	FBgn0034643	XLOC_004784	2R	FBtr0330228	44.202	0.138481	0.425528	0.325434	0.744852	1
CG10324	FBgn0038454	XLOC_013047	3R	FBtr0083356	73.0579	0.358234	0.389581	0.919538	0.357814	0.873384
CG10326	FBgn0038453	XLOC_011051	3R	FBtr0083336;FBtr0333728	16.4278	0.624905	0.514382	1.21487	0.224417	1
CG10333	FBgn0032690	XLOC_001425	2L	FBtr0081072	18.9568	0.548486	0.515364	1.06427	0.287207	1
CG10336	FBgn0032698	XLOC_001429	2L	FBtr0273194;FBtr0081095	24.3015	0.940755	0.498879	1.88574	0.0593303	1
CG10337	FBgn0032805	XLOC_003171	2L	FBtr0081276	1960.49	0.522687	0.289091	1.80804	0.0706006	0.52166
CG10338	FBgn0032700	XLOC_001430	2L	FBtr0343108;FBtr0081096	6.55629	0.594824	0.493873	1.20441	0.228433	1
CG10339	FBgn0034972	XLOC_006749	2R	FBtr0072288	1.24425	0.269628	0.294186	0.91652	0.359394	1
CG10341	FBgn0032701	XLOC_001431	2L	FBtr0343109;FBtr0081097	39.4965	0.138478	0.469196	0.295139	0.767888	1
CG10343	FBgn0032703	XLOC_001432	2L	FBtr0081098	28.9923	0.157759	0.464598	0.33956	0.734188	1
CG10344	FBgn0034729	XLOC_006576	2R	FBtr0071841;FBtr0071840	83.503	0.964835	0.407163	2.36965	0.0178047	0.287228
CG10345	FBgn0027562	XLOC_013044	3R	FBtr0083360	3.55878	-0.160489	0.370275	-0.433432	0.664701	1
CG10347	FBgn0030342	XLOC_016200	X	FBtr0073602;FBtr0073603	2.48797	0.0684353	0.333754	0.205047	0.837535	1
CG10352	FBgn0030348	XLOC_016203	X	FBtr0331589	644.425	-0.525208	0.300152	-1.74981	0.0801516	0.544976
CG10353	FBgn0030349	XLOC_016204	X	FBtr0344702;FBtr0308070;FBtr0344703;FBtr0331594;FBtr0331591;FBtr0114452;FBtr0114451	278.405	-0.567209	0.278381	-2.03753	0.0415972	0.427344
CG10357	FBgn0035453	XLOC_007105	3L	FBtr0300062	0.442998	0.163596	0.24015	0.681227	0.495728	1
CG10359	FBgn0035452	XLOC_007104	3L	FBtr0290290;FBtr0273204	1.95475	0.0191257	0.313596	0.0609883	0.951369	1
CG10361	FBgn0036208	XLOC_009341	3L	FBtr0076084	8.63746	-0.445612	0.510815	-0.872355	0.383015	1
CG10362	FBgn0030358	XLOC_016211	X	FBtr0073590	6.70083	7.09969e-05	0.505935	0.000140328	0.999888	1
CG10365	FBgn0039109	XLOC_011519	3R	FBtr0084449;FBtr0084446;FBtr0084447;FBtr0084448	54.2753	-0.519133	0.401153	-1.2941	0.195631	1
CG10366	FBgn0032814	XLOC_001514	2L	FBtr0081259	6.17519	0.418466	0.493983	0.847126	0.396925	1
CG10375	FBgn0039116	XLOC_011524	3R	FBtr0300681;FBtr0084458	101.926	0.207619	0.344205	0.603185	0.546386	0.943735
CG10376	FBgn0032702	XLOC_003099	2L	FBtr0081128	460.415	0.249184	0.507676	0.490834	0.623544	0.958939
CG10383	FBgn0032699	XLOC_003098	2L	FBtr0089628;FBtr0343117	12.591	0.129428	0.51535	0.251146	0.801701	1
CG10395	FBgn0033019	XLOC_003422	2R	FBtr0347210;FBtr0347209	8.35964	-0.2624	0.494584	-0.530547	0.595733	1
CG10396	FBgn0033020	XLOC_003423	2R	FBtr0335260;FBtr0086089	2.69901	0.506174	0.374629	1.35113	0.176653	1
CG10399	FBgn0031877	XLOC_000597	2L	FBtr0079351;FBtr0343774	6.08638	0.839111	0.48029	1.74709	0.080621	1
CG10405	FBgn0038431	XLOC_011036	3R	FBtr0110773	1.17314	0.204735	0.260603	0.78562	0.43209	1
CG1041	FBgn0037440	XLOC_012290	3R	FBtr0110774;FBtr0344293;FBtr0081734;FBtr0347005	33.3556	0.392089	0.472158	0.83042	0.406301	1
CG10413	FBgn0032689	XLOC_003088	2L	FBtr0081080;FBtr0343829	22.5366	-0.51246	0.488823	-1.04836	0.294475	1
CG10417	FBgn0033021	XLOC_005147	2R	FBtr0086092;FBtr0086091	18.2707	0.115233	0.503601	0.228818	0.819011	1
CG10420	FBgn0039296	XLOC_013640	3R	FBtr0084870	4.28547	0.00337106	0.405673	0.00830979	0.99337	1
CG10424	FBgn0036848	XLOC_009840	3L	FBtr0075033	3.14757	0.182638	0.384843	0.474578	0.635088	1
CG10425	FBgn0039304	XLOC_013643	3R	FBtr0084867	35.9919	0.253542	0.444639	0.57022	0.568528	1
CG10426	FBgn0036273	XLOC_007703	3L	FBtr0076007;FBtr0333356	3.48298	-0.040474	0.397186	-0.101902	0.918835	1
CG10428	FBgn0032724	XLOC_001447	2L	FBtr0081132	28.6562	-0.202511	0.469357	-0.431465	0.66613	1
CG10431	FBgn0032730	XLOC_001450	2L	FBtr0340317;FBtr0081134	483.196	0.383204	0.283411	1.35211	0.176339	0.712295
CG10433	FBgn0034638	XLOC_006497	2R	FBtr0071691;FBtr0071690;FBtr0344882	26.2115	0.105147	0.4905	0.214367	0.830261	1
CG10435	FBgn0037539	XLOC_012410	3R	FBtr0081820	121.238	0.149437	0.349148	0.428005	0.668647	0.967696
CG10440	FBgn0034636	XLOC_006495	2R	FBtr0071692;FBtr0308642	4.91816	-0.123065	0.445233	-0.276406	0.782236	1
CG10444	FBgn0034494	XLOC_006380	2R	FBtr0086305	18.7519	0.813756	0.50243	1.61964	0.10531	1
CG10445	FBgn0037531	XLOC_012402	3R	FBtr0304704;FBtr0339711;FBtr0300685	11.744	-0.261337	0.513713	-0.508721	0.610948	1
CG10462	FBgn0032815	XLOC_003182	2L	FBtr0331244;FBtr0100352;FBtr0331243;FBtr0305952;FBtr0100351;FBtr0081325	40.6145	0.644643	0.50355	1.2802	0.200476	1
CG10463	FBgn0032819	XLOC_001517	2L	FBtr0081290	21.5085	0.171616	0.487576	0.351977	0.724855	1
CG10465	FBgn0033017	XLOC_005145	2R	FBtr0086094	21.8527	-0.0184847	0.495089	-0.0373362	0.970217	1
CG10466	FBgn0032822	XLOC_001518	2L	FBtr0332178;FBtr0081291	8.00371	-0.334876	0.489848	-0.683633	0.494207	1
CG10469;CG10467		XLOC_008928	3L	FBtr0077064;FBtr0077063	155.586	1.13454	0.440252	2.57703	0.00996547	0.201547
CG10470	FBgn0032746	XLOC_001462	2L	FBtr0081146	82.3349	-0.350855	0.378488	-0.926991	0.353931	0.873384
CG10472	FBgn0035670	XLOC_008926	3L	FBtr0077066	1182.19	0.405541	0.285431	1.4208	0.155375	0.69517
CG10477	FBgn0035661	XLOC_008924	3L	FBtr0077068;FBtr0346804	35.7788	0.221078	0.460738	0.479834	0.631346	1
CG10479	FBgn0035656	XLOC_008920	3L	FBtr0332041;FBtr0077070	3.94852	0.538341	0.448594	1.20006	0.230115	1
CG10481	FBgn0032827	XLOC_003193	2L	FBtr0081312	5.53106	0.398832	0.435908	0.914945	0.36022	1
CG10483	FBgn0035649	XLOC_008917	3L	FBtr0077077	3.84883	-0.938663	0.442938	-2.11918	0.0340756	1
CG10486	FBgn0035647	XLOC_008916	3L	FBtr0305273;FBtr0114644	2.23862	-0.0151343	0.329545	-0.0459248	0.96337	1
CG10492	FBgn0032748	XLOC_001464	2L	FBtr0113043;FBtr0081148	45.0316	0.391376	0.417789	0.936779	0.348872	1
CG10494	FBgn0034634	XLOC_006487	2R	FBtr0071699;FBtr0071700	84.8158	-0.135555	0.375399	-0.361095	0.718028	0.972543
CG10495	FBgn0032750	XLOC_001466	2L	FBtr0081150	2.82342	-0.562075	0.378199	-1.48619	0.137229	1
CG10505	FBgn0034612	XLOC_006470	2R	FBtr0071619	435.795	-0.0176847	0.318734	-0.0554843	0.955753	0.998087
CG10508	FBgn0037060	XLOC_008315	3L	FBtr0331854;FBtr0307387;FBtr0307386;FBtr0307385	58.329	0.551409	0.429088	1.28507	0.198767	0.745649
CG10510	FBgn0037059	XLOC_010017	3L	FBtr0078310	16.6011	0.214588	0.515226	0.416493	0.677049	1
CG10512	FBgn0037057	XLOC_008314	3L	FBtr0078297;FBtr0078300;FBtr0078298;FBtr0078299	11.3797	-0.0121504	0.515119	-0.0235876	0.981182	1
CG10513	FBgn0039311	XLOC_013646	3R	FBtr0114505	194.993	0.27668	0.318514	0.868658	0.385034	0.893508
CG10514	FBgn0039312	XLOC_013647	3R	FBtr0084864	101.078	0.449033	0.365833	1.22743	0.219662	0.770409
CG10516	FBgn0036549	XLOC_007923	3L	FBtr0075512	13.2998	0.693631	0.514139	1.34911	0.177301	1
CG10527	FBgn0034583	XLOC_006451	2R	FBtr0071541	36.349	-0.676826	0.492582	-1.37404	0.16943	1
CG10543	FBgn0034570	XLOC_004726	2R	FBtr0332594;FBtr0071524;FBtr0332593;FBtr0303195	36.1531	-0.125186	0.497586	-0.251586	0.801361	1
CG10550	FBgn0039321	XLOC_013652	3R	FBtr0305953;FBtr0084858;FBtr0084857	158.717	-0.181107	0.36837	-0.491645	0.622971	0.958939
CG10553	FBgn0039324	XLOC_013656	3R	FBtr0084853	87.9438	0.776394	0.414242	1.87425	0.060896	0.489471
CG10555	FBgn0030034	XLOC_014767	X	FBtr0071174;FBtr0343353	74.304	-0.515999	0.434711	-1.18699	0.23523	0.786879
CG10559	FBgn0039323	XLOC_013655	3R	FBtr0289942	24.9186	0.248906	0.495895	0.501932	0.615715	1
CG10560	FBgn0039325	XLOC_013657	3R	FBtr0084852	25.8346	-0.0564808	0.4856	-0.116311	0.907406	1
CG10561	FBgn0002036	XLOC_001471	2L	FBtr0081155	43.625	0.514459	0.476575	1.07949	0.280368	1
CG10562	FBgn0039326	XLOC_013658	3R	FBtr0084851	48.9741	0.682793	0.413663	1.6506	0.0988202	1
CG10565	FBgn0037051	XLOC_010012	3L	FBtr0078323;FBtr0305502	69.0751	0.310123	0.381709	0.812458	0.416529	0.912726
CG10566	FBgn0037050	XLOC_008309	3L	FBtr0078292;FBtr0305500	175.629	0.522867	0.320058	1.63366	0.102329	0.588433
CG10576	FBgn0035630	XLOC_008896	3L	FBtr0345606;FBtr0345901;FBtr0077121	171.107	0.457555	0.337696	1.35493	0.175439	0.712295
CG10581	FBgn0037046	XLOC_010009	3L	FBtr0078326	12.0075	0.464713	0.515353	0.901737	0.367197	1
CG10584	FBgn0037045	XLOC_010008	3L	FBtr0078327	3.83458	-0.102694	0.457583	-0.224427	0.822425	1
CG10585	FBgn0037044	XLOC_008302	3L	FBtr0078287;FBtr0345136	24.1079	0.496455	0.487085	1.01924	0.308091	1
CG10587	FBgn0037039	XLOC_010001	3L	FBtr0339891;FBtr0333286;FBtr0078333	0.92109	-0.201544	0.250875	-0.803366	0.421763	1
CG10589	FBgn0037035	XLOC_008297	3L	FBtr0078266	45.8969	-0.396583	0.432842	-0.91623	0.359546	1
CG10590	FBgn0035622	XLOC_008892	3L	FBtr0077127	18.1623	0.513899	0.510744	1.00618	0.314331	1
CG10591	FBgn0035621	XLOC_008891	3L	FBtr0077128	19.303	0.178391	0.513934	0.347109	0.728509	1
CG10592	FBgn0035619	XLOC_008890	3L	FBtr0077129	139.777	-0.56748	0.36037	-1.57472	0.115322	0.62111
CG10600;CG31752		XLOC_003112	2L	FBtr0331194;FBtr0273228;FBtr0081120;FBtr0331193	125.7	-0.484845	0.361095	-1.34271	0.179367	0.712452
CG10602;mRpL13		XLOC_003114	2L	FBtr0089315;FBtr0089314;FBtr0308069;FBtr0089318	46.5694	0.574983	0.428244	1.34265	0.179384	1
CG10616	FBgn0036286	XLOC_007711	3L	FBtr0308896;FBtr0075956;FBtr0346569	15.4769	0.45214	0.511581	0.88381	0.376799	1
CG10621	FBgn0032726	XLOC_003120	2L	FBtr0342927;FBtr0342926;FBtr0081191	12.4221	0.426952	0.515157	0.82878	0.407229	1
CG10623	FBgn0032727	XLOC_003121	2L	FBtr0344844;FBtr0081190;FBtr0344845	45.2228	0.0630285	0.439247	0.143492	0.885901	1
CG10625	FBgn0035612	XLOC_008885	3L	FBtr0113144;FBtr0273233;FBtr0077140;FBtr0273232;FBtr0077139;FBtr0273231;FBtr0077138;FBtr0077137;FBtr0273234;FBtr0113146	7.83009	0.452429	0.508041	0.890536	0.373178	1
CG10628	FBgn0032818	XLOC_003185	2L	FBtr0081323	11.0583	0.139547	0.51531	0.270802	0.786543	1
CG10631	FBgn0032817	XLOC_003184	2L	FBtr0081324	101.138	0.86512	0.508646	1.70083	0.0889753	0.564287
CG10635	FBgn0035603	XLOC_008876	3L	FBtr0077154	18.7369	-0.0215677	0.50969	-0.0423153	0.966247	1
CG10638	FBgn0036290	XLOC_009397	3L	FBtr0345350;FBtr0089321;FBtr0089322	32.0477	-0.708282	0.462079	-1.53282	0.125321	1
CG10639	FBgn0032729	XLOC_003123	2L	FBtr0340323;FBtr0340324;FBtr0081186	47.1343	-0.280042	0.439492	-0.637196	0.523997	1
CG10646	FBgn0036292	XLOC_009398	3L	FBtr0075972	27.7824	-0.0472294	0.475893	-0.0992437	0.920945	1
CG10650	FBgn0046302	XLOC_003126	2L	FBtr0340320;FBtr0081183	153.494	-0.498654	0.321862	-1.54928	0.121315	0.631927
CG10651	FBgn0032853	XLOC_003217	2L	FBtr0345683;FBtr0081378	1.03366	0.190544	0.252882	0.753492	0.451154	1
CG10654	FBgn0036294	XLOC_009399	3L	FBtr0332644;FBtr0075971	294.906	0.0539793	0.334515	0.161366	0.871805	0.992493
CG10657	FBgn0036289	XLOC_009396	3L	FBtr0075975	104.323	-0.349481	0.354739	-0.985177	0.324537	0.849713
CG10659	FBgn0032839	XLOC_003206	2L	FBtr0081350	7.95884	-0.349722	0.510141	-0.685539	0.493004	1
CG10660	FBgn0036288	XLOC_009395	3L	FBtr0332645;FBtr0075976;FBtr0332647;FBtr0332646	56.9988	-1.08777	0.413118	-2.63306	0.00846185	0.189799
CG10663	FBgn0036287	XLOC_009394	3L	FBtr0346570;FBtr0113167	32.2072	-0.0259974	0.457188	-0.0568637	0.954654	1
CG10669	FBgn0039329	XLOC_013661	3R	FBtr0300687;FBtr0084848	31.0688	-0.404298	0.491202	-0.823078	0.410463	1
CG10671	FBgn0035586	XLOC_008868	3L	FBtr0077178;FBtr0077177	276.979	0.284325	0.311113	0.913896	0.360771	0.875213
CG10672	FBgn0035588	XLOC_008866	3L	FBtr0077179	154.35	0.24418	0.311386	0.784173	0.432939	0.914315
CG10674	FBgn0035592	XLOC_008864	3L	FBtr0077181	22.9966	-0.105316	0.485821	-0.21678	0.82838	1
CG10680	FBgn0032836	XLOC_001527	2L	FBtr0332182;FBtr0081303	12.7164	-0.45369	0.515268	-0.880493	0.378592	1
CG10681	FBgn0036291	XLOC_007716	3L	FBtr0332634;FBtr0075957	51.5775	0.216157	0.420615	0.513906	0.607317	1
CG10688	FBgn0036300	XLOC_007721	3L	FBtr0075961	38.548	0.646652	0.464361	1.39256	0.163752	1
CG10694	FBgn0039147	XLOC_011547	3R	FBtr0084542	20.2639	0.254648	0.50222	0.507045	0.612123	1
CG10702	FBgn0032752	XLOC_003135	2L	FBtr0303241;FBtr0081176;FBtr0081175;FBtr0081174	169.296	-0.340871	0.307868	-1.1072	0.268208	0.815573
CG10710	FBgn0036377	XLOC_009474	3L	FBtr0075817	37.9141	0.810073	0.460437	1.75936	0.0785165	1
CG10713	FBgn0036360	XLOC_009465	3L	FBtr0075855	0.442998	0.163596	0.24015	0.681227	0.495728	1
CG10721	FBgn0032846	XLOC_001533	2L	FBtr0331615;FBtr0081333	75.8028	-0.23922	0.400551	-0.597228	0.550355	0.945237
CG10725	FBgn0036362	XLOC_007790	3L	FBtr0089323	12.8065	0.026547	0.515323	0.0515153	0.958915	1
CG10730	FBgn0032843	XLOC_003210	2L	FBtr0343848	109.278	0.234104	0.379291	0.617215	0.537093	0.938255
CG10731	FBgn0034081	XLOC_005968	2R	FBtr0344527;FBtr0345647	9.32265	0.0614164	0.500042	0.122822	0.902248	1
CG10732	FBgn0036365	XLOC_007792	3L	FBtr0331534;FBtr0331533;FBtr0075851;FBtr0075852	20.5093	-0.0812901	0.51305	-0.158445	0.874106	1
CG10734	FBgn0034082	XLOC_005970	2R	FBtr0087250	184.005	-0.259063	0.301955	-0.857952	0.390919	0.896232
CG10737	FBgn0034420	XLOC_004563	2R	FBtr0290312;FBtr0290316;FBtr0086586;FBtr0086585;FBtr0290314;FBtr0290313;FBtr0100282;FBtr0290318;FBtr0290311;FBtr0086588;FBtr0340452;FBtr0340453;FBtr0340451;FBtr0290317	51.9162	-0.350288	0.442698	-0.791257	0.428794	1
CG10738	FBgn0036368	XLOC_007793	3L	FBtr0304791;FBtr0304792;FBtr0302488;FBtr0302487	2.25526	0.234002	0.391579	0.597586	0.550116	1
CG1074	FBgn0037250	XLOC_010186	3R	FBtr0078925	14.2052	0.966152	0.514541	1.8777	0.0604226	1
CG10747	FBgn0032845	XLOC_003213	2L	FBtr0081341;FBtr0331618	6.75481	-0.194002	0.488338	-0.397271	0.691168	1
CG10748	FBgn0036327	XLOC_009426	3L	FBtr0075900	0.56801	-0.194549	0.245753	-0.791644	0.428568	1
CG10749	FBgn0036328	XLOC_007744	3L	FBtr0075871	0.674208	-0.194293	0.245566	-0.791208	0.428823	1
CG10752	FBgn0036325	XLOC_009424	3L	FBtr0075903	3.91875	0.290028	0.407303	0.712068	0.476423	1
CG10754	FBgn0036314	XLOC_009415	3L	FBtr0075944	10.4025	-1.07904	0.514885	-2.09569	0.0361101	1
CG10764	FBgn0034221	XLOC_004378	2R	FBtr0086919	2.34628	0.361282	0.329199	1.09746		1
CG1077	FBgn0037405	XLOC_010285	3R	FBtr0078587	1.13602	-0.221131	0.261966	-0.844122	0.398601	1
CG10777	FBgn0029979	XLOC_015972	X	FBtr0071132;FBtr0344137	82.4682	0.146312	0.408004	0.358606	0.71989	0.972543
CG10778	FBgn0029980	XLOC_015973	X	FBtr0071131;FBtr0331433	3.99671	0.143221	0.432812	0.330908	0.740714	1
CG10793	FBgn0029656	XLOC_015730	X	FBtr0070536	154.093	-0.217643	0.343275	-0.634018	0.526069	0.93778
CG10795	FBgn0034626	XLOC_006482	2R	FBtr0071609	1.5456	0.318126	0.314606	1.01119	0.311926	1
CG10799	FBgn0033821	XLOC_004042	2R	FBtr0087748	5.24923	0.0429479	0.469545	0.0914671	0.927121	1
CG10802	FBgn0029664	XLOC_014500	X	FBtr0331609;FBtr0070568	3.20289	-0.212884	0.414287	-0.513856	0.607353	1
CG10803	FBgn0029666	XLOC_014501	X	FBtr0331611;FBtr0331610;FBtr0070569;FBtr0332285;FBtr0331612	1.24222	-0.296758	0.295801	-1.00323	0.315748	1
CG10804	FBgn0029663	XLOC_015737	X	FBtr0344077;FBtr0114487;FBtr0070592;FBtr0070591	255.673	-0.572329	0.291657	-1.96233	0.0497236	0.458926
CG10809	FBgn0036052	XLOC_009208	3L	FBtr0300688;FBtr0076366	14.3525	-0.512741	0.510824	-1.00375	0.315499	1
CG10824	FBgn0038865	XLOC_013331	3R	FBtr0084028	704.955	0.183565	0.264042	0.695209	0.486924	0.932543
CG10827	FBgn0038845	XLOC_013312	3R	FBtr0084048	397.158	-0.58257	0.300522	-1.93853	0.0525587	0.46924
CG10830	FBgn0038839	XLOC_013307	3R	FBtr0083986	4.48052	-0.575368	0.446442	-1.28879	0.197473	1
CG10839	FBgn0028858	XLOC_001273	2L	FBtr0343725;FBtr0305563	0.442998	0.163596	0.24015	0.681227	0.495728	1
CG10841	FBgn0038163	XLOC_010846	3R	FBtr0309093;FBtr0082795	59.9436	-0.200119	0.440993	-0.453792	0.649978	0.963487
CG10845	FBgn0039246	XLOC_011630	3R	FBtr0084713	1.68552	-0.301055	0.298355	-1.00905	0.312952	1
CG10862	FBgn0035455	XLOC_008759	3L	FBtr0073139	9.09068	-0.839878	0.507762	-1.65408	0.098112	1
CG10863	FBgn0027552	XLOC_008779	3L	FBtr0073171	30.3565	0.797423	0.464399	1.71711	0.0859592	1
CG10864	FBgn0038621	XLOC_013166	3R	FBtr0083654	0.442998	0.163596	0.24015	0.681227	0.495728	1
CG10866	FBgn0035475	XLOC_008777	3L	FBtr0345342;FBtr0073173	13.8995	-0.212163	0.515214	-0.411796	0.680489	1
CG10869	FBgn0031347	XLOC_001861	2L	FBtr0077917	2.12852	-0.192698	0.323389	-0.59587	0.551262	1
CG10874	FBgn0031395	XLOC_001907	2L	FBtr0308189;FBtr0330664;FBtr0077849;FBtr0077848	15.1933	0.00843667	0.509027	0.0165741	0.986776	1
CG10877	FBgn0038804	XLOC_013277	3R	FBtr0083950	113.082	0.305313	0.351752	0.867979	0.385406	0.893508
CG10880	FBgn0031398	XLOC_001913	2L	FBtr0330675;FBtr0077843	42.5385	0.307956	0.453552	0.678988	0.497146	1
CG10881	FBgn0038796	XLOC_011290	3R	FBtr0083885	0.674208	-0.194293	0.245566	-0.791208	0.428823	1
CG10887	FBgn0038773	XLOC_011279	3R	FBtr0083864	0.674208	-0.194293	0.245566	-0.791208	0.428823	1
CG10889	FBgn0038769	XLOC_013256	3R	FBtr0083839	125.829	-0.128128	0.388764	-0.329579	0.741718	0.972543
CG10898	FBgn0037911	XLOC_010683	3R	FBtr0082410	757.089	0.802083	0.288472	2.78045	0.00542835	0.1484
CG10899	FBgn0039235	XLOC_013609	3R	FBtr0308616;FBtr0084732	6.20923	0.0543838	0.461396	0.117868	0.906172	1
CG1090	FBgn0037238	XLOC_010175	3R	FBtr0335202;FBtr0335203;FBtr0335201;FBtr0332449	8.15213	0.307083	0.512532	0.59915	0.549073	1
CG10903	FBgn0037543	XLOC_010425	3R	FBtr0310411;FBtr0081787	72.209	0.403919	0.381954	1.05751	0.290281	0.833109
CG10904	FBgn0034945	XLOC_006731	2R	FBtr0343289;FBtr0072205	59.2194	-0.384964	0.451147	-0.853301	0.393492	0.896232
CG10907	FBgn0036207	XLOC_007661	3L	FBtr0076029	3.62399	-0.103249	0.394178	-0.261934	0.793372	1
CG1091	FBgn0037470	XLOC_012336	3R	FBtr0081641;FBtr0333326;FBtr0081640	72.4634	0.10467	0.422916	0.247497	0.804524	0.985388
CG10910	FBgn0034289	XLOC_004455	2R	FBtr0089630	140.837	-1.28966	0.376867	-3.42206	0.000621491	0.0360697
CG10911	FBgn0034295	XLOC_006139	2R	FBtr0086808	257.625	-0.585627	0.350123	-1.67264	0.0943992	0.577466
CG10912	FBgn0034296	XLOC_006140	2R	FBtr0086807	50.3849	-0.361184	0.418487	-0.863071	0.388098	1
CG10914	FBgn0034307	XLOC_004470	2R	FBtr0086745	0.631692	0.177839	0.247149	0.719562	0.471795	1
CG10915	FBgn0034308	XLOC_004471	2R	FBtr0086746;FBtr0345416	48.2696	-0.0593032	0.438991	-0.13509	0.892541	1
CG10916	FBgn0034312	XLOC_004474	2R	FBtr0332853	109.974	0.344524	0.347715	0.990822	0.321772	0.847072
CG10919	FBgn0037514	XLOC_010408	3R	FBtr0081739	0.56801	-0.194549	0.245753	-0.791644	0.428568	1
CG1092	FBgn0037228	XLOC_010167	3R	FBtr0336480;FBtr0336481	8.21256	1.10347	0.468214	2.35676	0.0184351	1
CG10924	FBgn0034356	XLOC_004518	2R	FBtr0086699;FBtr0113093	15.6689	-0.54336	0.507687	-1.07027	0.2845	1
CG10927	FBgn0034360	XLOC_004521	2R	FBtr0086705	38.2889	-0.0149324	0.452768	-0.0329803	0.97369	1
CG10931	FBgn0034274	XLOC_004436	2R	FBtr0089545	3.55597	-0.302148	0.44537	-0.678421	0.497505	1
CG10932	FBgn0029969	XLOC_015965	X	FBtr0345982;FBtr0071143	29.8776	0.199475	0.464878	0.42909	0.667858	1
CG10934;CG10933		XLOC_004431	2R	FBtr0086859;FBtr0086860	43.8322	-0.265021	0.468063	-0.566209	0.571252	1
CG10936	FBgn0034253	XLOC_006102	2R	FBtr0086895	13.0852	-0.120512	0.515364	-0.233838	0.815111	1
CG10943	FBgn0036320	XLOC_009419	3L	FBtr0075936	19.2074	0.665024	0.505524	1.31551	0.188337	1
CG10947	FBgn0032857	XLOC_003227	2L	FBtr0081369;FBtr0336750;FBtr0081370	4.6777	-0.057553	0.488305	-0.117863	0.906176	1
CG10948	FBgn0036317	XLOC_009417	3L	FBtr0273237;FBtr0075939;FBtr0075938	16.3034	-0.00421871	0.502879	-0.00838913	0.993307	1
CG10949	FBgn0032858	XLOC_003228	2L	FBtr0081367;FBtr0346417	1.01101	-0.032415	0.257769	-0.125752	0.899928	1
CG10950	FBgn0034205	XLOC_004366	2R	FBtr0086990	0.56801	-0.194549	0.245753	-0.791644	0.428568	1
CG10953	FBgn0034204	XLOC_006067	2R	FBtr0329878;FBtr0086997	1.01131	-0.202933	0.251888	-0.805647	0.420446	1
CG10958	FBgn0030004	XLOC_014752	X	FBtr0071153	47.0507	0.189643	0.460622	0.411709	0.680552	1
CG10959	FBgn0030010	XLOC_014756	X	FBtr0331614;FBtr0071157	3.94901	-0.064085	0.454174	-0.141102	0.887789	1
CG10960	FBgn0036316	XLOC_009416	3L	FBtr0075943;FBtr0075942;FBtr0075941	35.3031	0.504059	0.451587	1.11619	0.264339	1
CG10962;CR43836		XLOC_016034	X	FBtr0071263;FBtr0332280;FBtr0332279;FBtr0332281	160.406	0.0535867	0.314142	0.170581	0.864553	0.992493
CG10969	FBgn0036310	XLOC_009413	3L	FBtr0075946	0.612556	0.176021	0.246291	0.714687	0.474802	1
CG10970;CG44325		XLOC_016038	X	FBtr0346175;FBtr0340356;FBtr0340357;FBtr0339660;FBtr0339661;FBtr0339659	31.6256	-0.136081	0.492457	-0.276332	0.782293	1
CG10973	FBgn0036306	XLOC_009410	3L	FBtr0100354	57.1011	0.903312	0.42813	2.1099	0.0348671	0.391539
CG10979	FBgn0037379	XLOC_010267	3R	FBtr0078631;FBtr0335518	9.99633	-0.176455	0.514766	-0.342787	0.731759	1
CG10984	FBgn0036305	XLOC_007732	3L	FBtr0075919;FBtr0331554;FBtr0075921;FBtr0075920	165.421	-0.00792426	0.313222	-0.0252992	0.979816	0.998087
CG10993	FBgn0030524	XLOC_016298	X	FBtr0073837	47.2084	-1.00461	0.440009	-2.28317	0.0224204	1
CG10996	FBgn0030525	XLOC_016299	X	FBtr0073836	65.9221	-1.01005	0.414564	-2.43641	0.0148338	0.256773
CG11000	FBgn0263353	XLOC_010268	3R	FBtr0113195;FBtr0308953	15.5443	0.148124	0.356188	0.415859	0.677513	1
CG11007	FBgn0034455	XLOC_004597	2R	FBtr0345929	1.77681	0.0733097	0.30608	0.239512	0.810709	1
CG11018	FBgn0034464	XLOC_004614	2R	FBtr0086472	10.0222	0.0156832	0.513105	0.0305653	0.975616	1
CG11023	FBgn0031208	XLOC_000049	2L	FBtr0330654;FBtr0300690;FBtr0300689	910.782	-0.152794	0.273075	-0.559533	0.575798	0.949867
CG11029	FBgn0031735	XLOC_000498	2L	FBtr0079136	4.31252	-0.996101	0.449919	-2.21396	0.0268318	1
CG1103	FBgn0037235	XLOC_010174	3R	FBtr0078909;FBtr0111220	2.34482	-0.0263466	0.357324	-0.073733	0.941223	1
CG11030	FBgn0031736	XLOC_000497	2L	FBtr0079135;FBtr0332554	17.9906	-0.0187617	0.499849	-0.0375347	0.970059	1
CG11034	FBgn0031741	XLOC_000502	2L	FBtr0344769;FBtr0306841;FBtr0342609	53.3831	-0.0138596	0.435486	-0.0318257	0.974611	1
CG11035	FBgn0037544	XLOC_012413	3R	FBtr0081816	7.6868	0.765289	0.504585	1.51667	0.12935	1
CG1104	FBgn0037467	XLOC_012333	3R	FBtr0305316;FBtr0081643	49.2256	0.120146	0.430819	0.278879	0.780338	1
CG11041	FBgn0034481	XLOC_004648	2R	FBtr0300692	0.674208	-0.194293	0.245566	-0.791208	0.428823	1
CG11043	FBgn0031831	XLOC_000568	2L	FBtr0079289	30.1245	-0.153324	0.47341	-0.323871	0.746035	1
CG11044	FBgn0034484	XLOC_004651	2R	FBtr0086313	1.07469	0.234959	0.277667	0.846188	0.397448	1
CG1105	FBgn0037465	XLOC_012332	3R	FBtr0081645	8.92246	0.119608	0.508772	0.235091	0.814138	1
CG11050	FBgn0031836	XLOC_000570	2L	FBtr0079291;FBtr0079292;FBtr0079293	110.88	0.0818519	0.359252	0.22784	0.819771	0.985388
CG11052	FBgn0040524	XLOC_012409	3R	FBtr0335231;FBtr0081821;FBtr0308078;FBtr0308077	0.631692	0.177839	0.247149	0.719562	0.471795	1
CG11060	FBgn0033149	XLOC_003526	2R	FBtr0089045	1.55278	-0.043159	0.295159	-0.146223	0.883745	1
CG11068	FBgn0030536	XLOC_015084	X	FBtr0073854	34.9259	-0.74337	0.466946	-1.59198	0.111388	1
CG11069	FBgn0039244	XLOC_011629	3R	FBtr0084712	0.92109	-0.201544	0.250875	-0.803366	0.421763	1
CG11070	FBgn0028467	XLOC_000574	2L	FBtr0079297	11.8558	-0.195694	0.514786	-0.380146	0.703837	1
CG11073	FBgn0034693	XLOC_006546	2R	FBtr0336636;FBtr0336638;FBtr0336637;FBtr0300693;FBtr0071797	0.442998	0.163596	0.24015	0.681227	0.495728	1
CG11076	FBgn0039929	XLOC_014206	4	FBtr0089221;FBtr0344705;FBtr0344706	45.0905	0.0127453	0.45277	0.0281496	0.977543	1
CG11077	FBgn0039930	XLOC_014205	4	FBtr0089222	163.289	-0.407785	0.40611	-1.00413	0.315318	0.844864
CG1109	FBgn0046222	XLOC_010256	3R	FBtr0078714;FBtr0078713	28.8001	-0.274113	0.475404	-0.57659	0.564217	1
CG11095	FBgn0030528	XLOC_015082	X	FBtr0073827	112.832	-0.11435	0.386293	-0.296018	0.767216	0.978361
CG11099	FBgn0034485	XLOC_004655	2R	FBtr0086315;FBtr0342673	6.99998	-0.334673	0.467815	-0.715395		1
CG11103	FBgn0030522	XLOC_015080	X	FBtr0100218	1.62356	0.0848322	0.327501	0.259029	0.795613	1
CG11106	FBgn0030280	XLOC_014917	X	FBtr0073446;FBtr0343040	0.442998	0.163596	0.24015	0.681227	0.495728	1
CG11107	FBgn0033160	XLOC_003536	2R	FBtr0088966;FBtr0336909	19.687	-0.218429	0.512198	-0.426455	0.669776	1
CG11109	FBgn0037200	XLOC_008450	3L	FBtr0078552;FBtr0078553	31.8743	0.277874	0.47845	0.58078	0.561389	1
CG11110	FBgn0034535	XLOC_004697	2R	FBtr0086231	75.1929	0.611117	0.391326	1.56166	0.118369	0.628131
CG11112	FBgn0033164	XLOC_003538	2R	FBtr0113047	43.1222	-0.375162	0.448791	-0.835938	0.40319	1
CG11113	FBgn0033165	XLOC_003539	2R	FBtr0113048	34.3637	-0.111622	0.474438	-0.235271	0.813998	1
CG11122	FBgn0030266	XLOC_016153	X	FBtr0073481	115.702	0.00844332	0.425462	0.0198451	0.984167	0.998087
CG11123;sPLA2		XLOC_003543	2R	FBtr0088971;FBtr0100138;FBtr0088973;FBtr0088972	15.8128	-0.0487232	0.511965	-0.0951691	0.924181	1
CG11125	FBgn0033174	XLOC_003544	2R	FBtr0088974;FBtr0336911	2743.96	-0.0781549	0.304476	-0.256686	0.797421	0.983737
CG11127	FBgn0033178	XLOC_003546	2R	FBtr0088975	63.8226	-0.459007	0.403773	-1.13679	0.255624	0.806977
CG1113	FBgn0037304	XLOC_010221	3R	FBtr0332428;FBtr0078779	14.8712	-0.480518	0.513108	-0.936484	0.349024	1
CG11131	FBgn0037204	XLOC_008454	3L	FBtr0332052;FBtr0078558	1.85477	-0.124849	0.338134	-0.36923	0.711956	1
CG11134	FBgn0030518	XLOC_015073	X	FBtr0331708;FBtr0073818	38.0683	0.0584812	0.446342	0.131023	0.895757	1
CG11137	FBgn0037199	XLOC_010119	3L	FBtr0347060;FBtr0078577	169.374	0.106303	0.307496	0.345705	0.729565	0.972543
CG11138	FBgn0030400	XLOC_016235	X	FBtr0331718;FBtr0073662;FBtr0273245	228.285	0.0813275	0.325992	0.249477	0.802992	0.984979
CG11141	FBgn0033177	XLOC_005266	2R	FBtr0345799;FBtr0088999;FBtr0088998	6.86422	0.0699866	0.463759	0.150911	0.880046	1
CG11145	FBgn0033168	XLOC_005260	2R	FBtr0089004	0.442998	0.163596	0.24015	0.681227	0.495728	1
CG11147	FBgn0031734	XLOC_002187	2L	FBtr0079166;FBtr0079165	133.808	-0.13555	0.341455	-0.396979	0.691383	0.969394
CG11148	FBgn0039936	XLOC_014198	4	FBtr0300886;FBtr0300885;FBtr0300884;FBtr0300882	70.7688	0.450283	0.400485	1.12435	0.260867	0.810812
CG11149	FBgn0031732	XLOC_002185	2L	FBtr0332556;FBtr0300695;FBtr0079169;FBtr0300696;FBtr0079168	15.2712	0.167744	0.507053	0.330822	0.740779	1
CG11151	FBgn0030519	XLOC_015074	X	FBtr0073819;FBtr0331719	244.705	-0.175377	0.300202	-0.584195	0.559089	0.947536
CG11155	FBgn0039927	XLOC_014156	4	FBtr0089194;FBtr0089195;FBtr0333701	91.1484	0.0972421	0.373638	0.260258	0.794665	0.98321
CG11158	FBgn0030511	XLOC_015070	X	FBtr0073812	162.838	-0.0266428	0.347738	-0.0766174	0.938928	0.998087
CG11159	FBgn0034539	XLOC_006417	2R	FBtr0086248	4.91529	0.101486	0.478278	0.212191	0.831958	1
CG1116	FBgn0037297	XLOC_010216	3R	FBtr0334907;FBtr0078775;FBtr0078774	55.3427	-0.143093	0.407897	-0.350808	0.725733	0.972543
CG11160	FBgn0030257	XLOC_014901	X	FBtr0331720;FBtr0073391;FBtr0073390	0.612556	0.176021	0.246291	0.714687	0.474802	1
CG11162	FBgn0030509	XLOC_015069	X	FBtr0073811	7.2433	-0.144353	0.507939	-0.284193	0.776263	1
CG11164	FBgn0030507	XLOC_015067	X	FBtr0073809;FBtr0340397	0.631692	0.177839	0.247149	0.719562	0.471795	1
CG11165;CG30378		XLOC_003586	2R	FBtr0088853;FBtr0088854	178.11	-0.0407163	0.319841	-0.127302	0.898702	0.992493
CG11168	FBgn0039249	XLOC_011633	3R	FBtr0306089;FBtr0084715;FBtr0337010;FBtr0337009	5.71488	0.252679	0.449673	0.561917	0.574173	1
CG11170	FBgn0034705	XLOC_006553	2R	FBtr0342983;FBtr0342982;FBtr0071786	16.0167	0.499057	0.510773	0.977063	0.328538	1
CG11178	FBgn0030499	XLOC_015063	X	FBtr0345128;FBtr0073805	179.117	-0.107933	0.351744	-0.306851	0.758957	0.977422
CG11180	FBgn0034528	XLOC_006412	2R	FBtr0342722;FBtr0086254	94.4193	0.272768	0.351901	0.775128	0.438264	0.920168
CG11190	FBgn0030035	XLOC_016003	X	FBtr0071175	14.4122	-0.437634	0.511938	-0.854856	0.392631	1
CG11192	FBgn0034507	XLOC_006388	2R	FBtr0290122	1.5953	-0.355805	0.318462	-1.11726	0.263883	1
CG11200	FBgn0034500	XLOC_006385	2R	FBtr0086300;FBtr0344185;FBtr0086299	11.1775	0.154013	0.515285	0.298889	0.765025	1
CG11208	FBgn0034488	XLOC_006373	2R	FBtr0086322	40.6257	-0.218957	0.440615	-0.496935	0.619235	1
CG11210	FBgn0033259	XLOC_003601	2R	FBtr0088781	22.1494	0.219132	0.491516	0.445829	0.65572	1
CG11211	FBgn0033067	XLOC_005183	2R	FBtr0086005	2.65085	-0.0944062	0.38985	-0.24216	0.808656	1
CG11221	FBgn0031855	XLOC_000579	2L	FBtr0079303;FBtr0339237	1.11721	-0.0395778	0.264294	-0.149749	0.880963	1
CG11226	FBgn0037195	XLOC_008442	3L	FBtr0078546	54.1702	-0.461118	0.420078	-1.0977	0.272337	1
CG11227	FBgn0031139	XLOC_016778	X	FBtr0077275;FBtr0077274;FBtr0077273	10.9895	0.172897	0.513643	0.33661	0.736411	1
CG11231	FBgn0039939	XLOC_014141	4	FBtr0089242	17.8152	-0.290513	0.512874	-0.566441	0.571094	1
CG11236	FBgn0031860	XLOC_000584	2L	FBtr0309812;FBtr0079339	2.19157	-0.0305689	0.35481	-0.0861559	0.931343	1
CG1124	FBgn0037290	XLOC_010210	3R	FBtr0078841	6.11569	-0.126378	0.486632	-0.2597	0.795095	1
CG11241	FBgn0037186	XLOC_010112	3L	FBtr0347061;FBtr0113188;FBtr0078536	226.426	0.0358802	0.326103	0.110027	0.912388	0.992493
CG11247	FBgn0037120	XLOC_010061	3L	FBtr0332769;FBtr0113184;FBtr0078458;FBtr0078459	5.57754	-0.0307169	0.454937	-0.0675191	0.946168	1
CG11248	FBgn0037117	XLOC_008366	3L	FBtr0333967;FBtr0078431;FBtr0078430	3.54854	-0.0380817	0.415488	-0.0916554	0.926972	1
CG11249	FBgn0037115	XLOC_008364	3L	FBtr0078429	117.479	-0.157195	0.342099	-0.459501	0.645875	0.962354
CG11257	FBgn0034442	XLOC_004582	2R	FBtr0086525	84.0717	0.240002	0.378613	0.6339	0.526146	0.93778
CG1126	FBgn0037280	XLOC_010204	3R	FBtr0078872	15.1779	-0.498049	0.514025	-0.968921	0.332585	1
CG11261	FBgn0036332	XLOC_009427	3L	FBtr0075899	4.44122	0.0284513	0.486045	0.0585362	0.953321	1
CG11262	FBgn0036329	XLOC_007745	3L	FBtr0075872	0.612556	0.176021	0.246291	0.714687	0.474802	1
CG11263	FBgn0036330	XLOC_007746	3L	FBtr0300699;FBtr0075873	1.05555	0.229201	0.274766	0.834167	0.404187	1
CG11267	FBgn0036334	XLOC_007748	3L	FBtr0075875	12.5011	0.0819985	0.514288	0.159441	0.873322	1
CG11269	FBgn0034700	XLOC_004822	2R	FBtr0071765	1.3059	-0.000464354	0.279318	-0.00166246	0.998674	1
CG11275	FBgn0034706	XLOC_004825	2R	FBtr0071769	32.0964	-0.281837	0.483852	-0.582486	0.560239	1
CG11279	FBgn0036342	XLOC_007760	3L	FBtr0332077;FBtr0345366;FBtr0075887	2.88844	0.0698491	0.403594	0.173068	0.862598	1
CG11284	FBgn0030056	XLOC_014784	X	FBtr0345984;FBtr0331731;FBtr0071222;FBtr0331730;FBtr0331729	96.053	0.188859	0.348583	0.54179	0.587963	0.955341
CG11286	FBgn0037516	XLOC_012388	3R	FBtr0306042;FBtr0081779	0.674208	-0.194293	0.245566	-0.791208	0.428823	1
CG11289	FBgn0031887	XLOC_000608	2L	FBtr0289952	7.93705	0.116972	0.498262	0.234759	0.814396	1
CG1129	FBgn0037279	XLOC_010203	3R	FBtr0345175;FBtr0078870;FBtr0078871;FBtr0345174	593.308	-0.317678	0.255089	-1.24536	0.212998	0.764134
CG11291	FBgn0034713	XLOC_004829	2R	FBtr0071773	0.631692	0.177839	0.247149	0.719562	0.471795	1
CG11294	FBgn0030058	XLOC_016024	X	FBtr0331456;FBtr0071224	3.47545	0.379335	0.405605	0.935232	0.349669	1
CG11298	FBgn0034721	XLOC_004838	2R	FBtr0071819	1.47666	0.245534	0.281661	0.871737	0.383352	1
CG11306	FBgn0037108	XLOC_008357	3L	FBtr0333392;FBtr0078422	48.5657	0.399859	0.429562	0.930854	0.351929	1
CG11307	FBgn0037106	XLOC_008356	3L	FBtr0301160;FBtr0333391	1.6427	0.0910129	0.330084	0.275727	0.782758	1
CG11309	FBgn0037070	XLOC_010026	3L	FBtr0345883;FBtr0321283;FBtr0078407;FBtr0331798;FBtr0078406;FBtr0321282	76.032	-0.298764	0.414538	-0.720715	0.471085	0.932543
CG11318	FBgn0039818	XLOC_014055	3R	FBtr0085739	23.0416	-0.305958	0.494454	-0.61878	0.536061	1
CG11319	FBgn0031835	XLOC_002262	2L	FBtr0343160;FBtr0089641;FBtr0343159	56.5691	-0.375302	0.450624	-0.83285	0.404929	0.900752
CG11320	FBgn0031837	XLOC_002263	2L	FBtr0113026	411.244	0.150362	0.361081	0.416422	0.677101	0.969394
CG11321	FBgn0031857	XLOC_002282	2L	FBtr0331221;FBtr0331216;FBtr0331220;FBtr0331218;FBtr0290295;FBtr0331217;FBtr0331219;FBtr0301972;FBtr0331222	6.95763	-0.934612	0.47965	-1.94853	0.0513517	1
CG11322	FBgn0031856	XLOC_002281	2L	FBtr0290242	1.72976	0.0806299	0.329871	0.244429	0.806899	1
CG11327	FBgn0031849	XLOC_002274	2L	FBtr0079315	1.11721	-0.0395778	0.264294	-0.149749	0.880963	1
CG11337	FBgn0039846	XLOC_014072	3R	FBtr0300881;FBtr0334553;FBtr0085812;FBtr0085811	446.086	0.111876	0.256191	0.436689	0.662337	0.963487
CG11340	FBgn0039840	XLOC_014069	3R	FBtr0085766	16.5654	-0.141053	0.513313	-0.274789	0.783478	1
CG11342	FBgn0035537	XLOC_008819	3L	FBtr0073338	872.802	0.344963	0.329692	1.04632	0.295414	0.833109
CG11353	FBgn0035557	XLOC_007180	3L	FBtr0073309;FBtr0073308	18.5807	0.536057	0.513068	1.04481	0.296113	1
CG11357	FBgn0035558	XLOC_007181	3L	FBtr0304987;FBtr0113143;FBtr0073310;FBtr0113142	9.33918	0.0401536	0.493962	0.0812889	0.935212	1
CG1136	FBgn0035490	XLOC_007136	3L	FBtr0073203	8.02284	0.322855	0.501889	0.643281	0.520042	1
CG11360	FBgn0039920	XLOC_014138	4	FBtr0310541;FBtr0310539;FBtr0310540;FBtr0089091	298.079	0.491685	0.359163	1.36898	0.171006	0.712266
CG11362	FBgn0034737	XLOC_004853	2R	FBtr0071836	28.9786	-0.432699	0.468003	-0.924566	0.355192	1
CG11367	FBgn0037185	XLOC_008435	3L	FBtr0078528	115.8	-0.349028	0.331401	-1.05319	0.292255	0.833109
CG11369	FBgn0029951	XLOC_014720	X	FBtr0071067	1.5456	0.318126	0.314606	1.01119	0.311926	1
CG11370	FBgn0037181	XLOC_008432	3L	FBtr0330172;FBtr0078522	10.9881	0.31502	0.515171	0.611486	0.540878	1
CG11373	FBgn0040679	XLOC_012268	3R	FBtr0078657	1.1026	0.192537	0.253764	0.758724	0.448017	1
CG11374	FBgn0031214	XLOC_000054	2L	FBtr0306541	4.5807	0.0540836	0.462327	0.116981	0.906875	1
CG11377	FBgn0031217	XLOC_000056	2L	FBtr0330636;FBtr0078104	70.0152	0.191257	0.424379	0.450674	0.652225	0.963487
CG11378	FBgn0040364	XLOC_014376	X	FBtr0310611;FBtr0070197;FBtr0345513	57.2304	-0.81399	0.399342	-2.03833	0.0415169	0.427344
CG11379	FBgn0040362	XLOC_014377	X	FBtr0342727	0.56801	-0.194549	0.245753	-0.791644	0.428568	1
CG11380	FBgn0040359	XLOC_014380	X	FBtr0345506;FBtr0070201	1.24425	0.269628	0.294186	0.91652	0.359394	1
CG11381	FBgn0029568	XLOC_014382	X	FBtr0070203	1.5953	-0.355805	0.318462	-1.11726	0.263883	1
CG11382	FBgn0040367	XLOC_014384	X	FBtr0342728;FBtr0070205	20.3735	-0.0108269	0.510671	-0.0212013	0.983085	1
CG11384	FBgn0040363	XLOC_015605	X	FBtr0070251	48.1154	-0.206802	0.464327	-0.445379	0.656046	1
CG11388	FBgn0034959	XLOC_004999	2R	FBtr0072162	6.64491	0.567573	0.492389	1.15269	0.249037	1
CG1139	FBgn0035300	XLOC_006995	3L	FBtr0072845	4.12309	0.431718	0.415033	1.0402	0.298246	1
CG11391	FBgn0038732	XLOC_011253	3R	FBtr0083789	1.81023	-0.413827	0.338	-1.22434	0.220823	1
CG11395	FBgn0034200	XLOC_004359	2R	FBtr0086987;FBtr0345519	75.7325	0.600822	0.425253	1.41286	0.157697	0.69517
CG11396	FBgn0037022	XLOC_009981	3L	FBtr0078276	9.04911	0.387186	0.495603	0.781243	0.43466	1
CG11398	FBgn0040366	XLOC_015606	X	FBtr0345522;FBtr0070250	2.10835	0.41808	0.349732	1.19543	0.23192	1
CG11399	FBgn0037021	XLOC_009980	3L	FBtr0078277	187.123	0.413137	0.388409	1.06366	0.287481	0.83232
CG11400	FBgn0034198	XLOC_004356	2R	FBtr0345517	23.5201	-0.141488	0.496241	-0.28512	0.775552	1
CG11403	FBgn0026876	XLOC_015608	X	FBtr0070245	5.29321	-0.302447	0.451002	-0.670611	0.502468	1
CG11406	FBgn0034990	XLOC_006757	2R	FBtr0343437;FBtr0300874;FBtr0072276;FBtr0100169	133.279	0.266889	0.339578	0.785942	0.431902	0.914315
CG11407	FBgn0038733	XLOC_011254	3R	FBtr0083790	12.7938	0.419784	0.515314	0.814618	0.415291	1
CG11409	FBgn0024366	XLOC_015612	X	FBtr0070238;FBtr0342730	3.0347	0.00550188	0.407496	0.0135017	0.989228	1
CG11412	FBgn0024362	XLOC_014387	X	FBtr0070209;FBtr0310619	63.7705	0.324861	0.415546	0.781768	0.434351	0.914951
CG11413	FBgn0035022	XLOC_005057	2R	FBtr0072305	4.47582	0.59182	0.453736	1.30433	0.192122	1
CG11414	FBgn0035024	XLOC_005059	2R	FBtr0072307	15.1923	0.386467	0.513068	0.753248	0.451301	1
CG11417	FBgn0024364	XLOC_014389	X	FBtr0070212	39.7802	0.0476919	0.469979	0.101477	0.919172	1
CG11418	FBgn0024360	XLOC_015613	X	FBtr0070237;FBtr0332288;FBtr0070236	200.698	0.151971	0.341145	0.445474	0.655977	0.963487
CG1142	FBgn0037504	XLOC_012367	3R	FBtr0081559	3.69481	-0.0782207	0.392317	-0.199382	0.841964	1
CG11423	FBgn0034251	XLOC_004403	2R	FBtr0086834	3.17432	-0.496619	0.419614	-1.18351	0.236605	1
CG11425	FBgn0037167	XLOC_008411	3L	FBtr0078507	0.612556	0.176021	0.246291	0.714687	0.474802	1
CG11426	FBgn0037166	XLOC_008410	3L	FBtr0078506	21.5211	-0.394256	0.510416	-0.772421	0.439865	1
CG1143	FBgn0035359	XLOC_007029	3L	FBtr0072937;FBtr0333445	87.3805	0.744109	0.368755	2.01789	0.0436023	0.442584
CG11436	FBgn0029713	XLOC_015782	X	FBtr0070699	8.282	0.0313043	0.480975	0.0650852	0.948106	1
CG11437	FBgn0037165	XLOC_008409	3L	FBtr0078505	0.56801	-0.194549	0.245753	-0.791644	0.428568	1
CG11438	FBgn0037164	XLOC_008408	3L	FBtr0345586	2.69653	-0.333883	0.376509	-0.886786	0.375194	1
CG11444	FBgn0029715	XLOC_015783	X	FBtr0070698;FBtr0343567	71.2759	0.331216	0.386962	0.855941	0.39203	0.896232
CG11447	FBgn0038737	XLOC_011261	3R	FBtr0083815	156.229	0.0832956	0.33339	0.249844	0.802708	0.984979
CG11448	FBgn0024985	XLOC_014394	X	FBtr0332292;FBtr0332291;FBtr0070225	39.2407	-0.352629	0.495179	-0.712124	0.476388	1
CG11449	FBgn0037162	XLOC_008407	3L	FBtr0078503	2.13626	0.420182	0.350355	1.1993	0.23041	1
CG11453	FBgn0038734	XLOC_011255	3R	FBtr0083791	13.2099	0.447161	0.514523	0.869079	0.384804	1
CG11454	FBgn0031224	XLOC_000063	2L	FBtr0078116	10.0833	0.0103082	0.480651	0.0214462	0.98289	1
CG11455;CG3436		XLOC_000058	2L	FBtr0330639;FBtr0330638;FBtr0306542;FBtr0330642;FBtr0330641;FBtr0301887;FBtr0330640;FBtr0301886;FBtr0078118;FBtr0078117;FBtr0340650;FBtr0078119	106.544	-0.292616	0.339636	-0.861558	0.388931	0.896232
CG11459	FBgn0037396	XLOC_012274	3R	FBtr0344315	2.46669	0.110423	0.361755	0.305243	0.760181	1
CG1146	FBgn0035346	XLOC_007019	3L	FBtr0072922;FBtr0072921;FBtr0072923;FBtr0344219	28.7171	-0.755792	0.484282	-1.56064	0.118608	1
CG11470	FBgn0039671	XLOC_013913	3R	FBtr0339895;FBtr0085471	0.442998	0.163596	0.24015	0.681227	0.495728	1
CG11475;CG11474		XLOC_006541	2R	FBtr0071803;FBtr0303766;FBtr0071802	93.1288	0.477031	0.380335	1.25424	0.209754	0.760134
CG11486	FBgn0035397	XLOC_007051	3L	FBtr0073002;FBtr0113130;FBtr0073003;FBtr0072999;FBtr0072991;FBtr0073000;FBtr0072998;FBtr0113131;FBtr0073001;FBtr0072992;FBtr0332113;FBtr0113129;FBtr0072993;FBtr0072994;FBtr0072995;FBtr0072996	86.7196	-0.0221176	0.379064	-0.0583478	0.953472	0.998087
CG11498	FBgn0039749	XLOC_013974	3R	FBtr0332535;FBtr0302562	125.08	-0.817623	0.339126	-2.41097	0.0159102	0.267674
CG11504	FBgn0039733	XLOC_011998	3R	FBtr0085549;FBtr0085548;FBtr0085547	3.13532	0.0221429	0.411517	0.0538081	0.957088	1
CG11505	FBgn0035424	XLOC_007074	3L	FBtr0073045;FBtr0308061;FBtr0073046	130.518	-0.215279	0.374403	-0.574994	0.565296	0.947536
CG11509	FBgn0029584	XLOC_014403	X	FBtr0305287	17.3515	0.234355	0.498084	0.470512	0.637989	1
CG11523	FBgn0037156	XLOC_010089	3L	FBtr0078511	104.817	-0.446738	0.343488	-1.30059	0.193398	0.73369
CG11529	FBgn0036264	XLOC_007701	3L	FBtr0076005	3.83503	0.211148	0.406315	0.519665	0.603297	1
CG11534	FBgn0046296	XLOC_007692	3L	FBtr0075995	24.2082	0.0871274	0.482675	0.180509	0.856753	1
CG11537	FBgn0035400	XLOC_008720	3L	FBtr0113132;FBtr0073116;FBtr0113133;FBtr0333894;FBtr0073117;FBtr0073115;FBtr0309235	35.3185	-0.419541	0.467941	-0.896568	0.369949	1
CG11539	FBgn0039859	XLOC_014080	3R	FBtr0085868;FBtr0337033	76.9572	-0.383365	0.396043	-0.967987	0.333051	0.859296
CG11550	FBgn0039864	XLOC_014081	3R	FBtr0085867	21.0145	-0.209592	0.514988	-0.406985	0.684019	1
CG11555	FBgn0086856	XLOC_000074	2L	FBtr0343777;FBtr0078128	15.3824	-0.174386	0.51304	-0.339907	0.733927	1
CG11560	FBgn0036249	XLOC_007689	3L	FBtr0075993	11.9157	-0.0181024	0.495707	-0.0365183	0.970869	1
CG11562	FBgn0031247	XLOC_000076	2L	FBtr0078130	14.1411	-0.113175	0.513397	-0.220444	0.825525	1
CG11563	FBgn0039868	XLOC_012108	3R	FBtr0085831	6.34725	-0.30855	0.487814	-0.632516	0.52705	1
CG11566	FBgn0031159	XLOC_015492	X	FBtr0091649	0.631692	0.177839	0.247149	0.719562	0.471795	1
CG11576	FBgn0039882	XLOC_014100	3R	FBtr0085852	62.1599	-0.254441	0.423831	-0.600336	0.548282	0.94436
CG11577	FBgn0036847	XLOC_009839	3L	FBtr0075034	11.7909	-0.311238	0.51253	-0.607257	0.54368	1
CG11583	FBgn0035524	XLOC_008813	3L	FBtr0073242	42.3203	0.644822	0.468559	1.37618	0.168765	1
CG11586	FBgn0035520	XLOC_008811	3L	FBtr0073243;FBtr0333568	515.703	-0.324195	0.282624	-1.14709	0.251345	0.806231
CG11588	FBgn0036221	XLOC_007670	3L	FBtr0076038;FBtr0332069	0.56801	-0.194549	0.245753	-0.791644	0.428568	1
CG11590	FBgn0030545	XLOC_015107	X	FBtr0073899	5.88599	-0.115628	0.45791	-0.252513	0.800645	1
CG11593	FBgn0035488	XLOC_008785	3L	FBtr0332982;FBtr0114509	14.2807	0.599555	0.515362	1.16337	0.244681	1
CG11594	FBgn0035484	XLOC_008783	3L	FBtr0073284;FBtr0309791;FBtr0310046;FBtr0073283	311.428	0.193865	0.305699	0.63417	0.52597	0.93778
CG11596	FBgn0023522	XLOC_014422	X	FBtr0332588;FBtr0070318;FBtr0070319;FBtr0070320;FBtr0332587	14.0903	-0.185153	0.514055	-0.360182	0.718711	1
CG11601	FBgn0031244	XLOC_001784	2L	FBtr0343780;FBtr0343779;FBtr0078137	117.893	0.257641	0.380059	0.677897	0.497837	0.932543
CG11608	FBgn0038069	XLOC_010784	3R	FBtr0303841	0.631692	0.177839	0.247149	0.719562	0.471795	1
CG1161	FBgn0037313	XLOC_010224	3R	FBtr0335000;FBtr0078785	36.1892	-0.0547213	0.462654	-0.118277	0.905848	1
CG11617	FBgn0031232	XLOC_001775	2L	FBtr0308246;FBtr0078146	76.0164	0.355011	0.417144	0.851051	0.394741	0.896232
CG11626	FBgn0038705	XLOC_011237	3R	FBtr0113247	103.324	-0.118293	0.471688	-0.250787	0.801979	0.984979
CG11630	FBgn0032964	XLOC_003354	2L	FBtr0085909	1.28676	-0.00592986	0.277179	-0.0213936	0.982932	1
CG11634	FBgn0032968	XLOC_001727	2L	FBtr0085930;FBtr0343880	0.442998	0.163596	0.24015	0.681227	0.495728	1
CG11638;CG32814		XLOC_015600	X	FBtr0070183;FBtr0336688	2.39775	0.0802586	0.331107	0.242395	0.808474	1
CG11652	FBgn0036194	XLOC_009330	3L	FBtr0332766;FBtr0076131;FBtr0076130	7.87397	0.189499	0.509883	0.371652	0.710152	1
CG11655	FBgn0030638	XLOC_015155	X	FBtr0074031	16.2729	0.380144	0.515306	0.737707	0.460693	1
CG11656	FBgn0038109	XLOC_010804	3R	FBtr0082698	194.393	-0.215866	0.307155	-0.702791	0.482186	0.932543
CG11658	FBgn0036196	XLOC_009332	3L	FBtr0076126;FBtr0076125;FBtr0076128;FBtr0076127;FBtr0076124	54.6894	-0.0107326	0.417909	-0.0256817	0.979511	1
CG11659	FBgn0038731	XLOC_013235	3R	FBtr0083797	0.56801	-0.194549	0.245753	-0.791644	0.428568	1
CG11663	FBgn0029539	XLOC_014362	X	FBtr0070164;FBtr0310165	0.674208	-0.194293	0.245566	-0.791208	0.428823	1
CG11664	FBgn0040341	XLOC_014361	X	FBtr0070163	6.65245	0.132204	0.49399	0.267625	0.788988	1
CG11665	FBgn0033028	XLOC_005151	2R	FBtr0345359;FBtr0086072	9.76824	-0.106101	0.506104	-0.209642	0.833947	1
CG11668	FBgn0038113	XLOC_010808	3R	FBtr0082705	0.442998	0.163596	0.24015	0.681227	0.495728	1
CG11670	FBgn0038114	XLOC_010809	3R	FBtr0300071	9.16779	0.232068	0.51473	0.450853	0.652095	1
CG11671	FBgn0037562	XLOC_010450	3R	FBtr0081829	196.775	-1.12288	0.346504	-3.2406	0.00119277	0.0525348
CG11672	FBgn0037563	XLOC_012432	3R	FBtr0332542;FBtr0081865	494.562	-0.545054	0.345106	-1.57938	0.114249	0.619748
CG11674	FBgn0030551	XLOC_016326	X	FBtr0073926	34.0068	0.00821092	0.485005	0.0169296	0.986493	1
CG11679	FBgn0030678	XLOC_016417	X	FBtr0074202	1.1997	0.00579257	0.274347	0.0211141	0.983155	1
CG11686	FBgn0040551	XLOC_010821	3R	FBtr0335222;FBtr0082735	2.16968	-0.0272568	0.326183	-0.0835628	0.933404	1
CG11693	FBgn0037570	XLOC_012438	3R	FBtr0306794;FBtr0081860	41.0048	-0.434806	0.449232	-0.967889	0.3331	1
CG11695	FBgn0030316	XLOC_014943	X	FBtr0300872;FBtr0073513	10.7477	0.0261637	0.514648	0.050838	0.959455	1
CG11696	FBgn0030314	XLOC_014942	X	FBtr0073512	18.7983	0.291427	0.50367	0.578607	0.562855	1
CG11697	FBgn0030313	XLOC_014941	X	FBtr0332616;FBtr0073511	0.442998	0.163596	0.24015	0.681227	0.495728	1
CG11699	FBgn0030311	XLOC_014940	X	FBtr0073510	4.58559	0.125012	0.451329	0.276986	0.781791	1
CG11700	FBgn0029856	XLOC_015877	X	FBtr0333520	1.05555	0.229201	0.274766	0.834167	0.404187	1
CG11703	FBgn0038690	XLOC_013209	3R	FBtr0083744	3.51142	-0.560147	0.43066	-1.30067	0.193371	1
CG11710	FBgn0031115	XLOC_016764	X	FBtr0339682;FBtr0089643;FBtr0089642	18.1199	0.668097	0.500927	1.33372	0.182295	1
CG11714;Fuca		XLOC_009304	3L	FBtr0346859;FBtr0100588;FBtr0346860;FBtr0339510;FBtr0076156	8.87741	-0.393497	0.514211	-0.765243	0.444127	1
CG1172	FBgn0264712	XLOC_010231	3R	FBtr0078792;FBtr0309312;FBtr0333810	5.57859	-0.60657	0.475753	-1.27497	0.202321	1
CG11722	FBgn0037777	XLOC_012575	3R	FBtr0082205	26.4184	0.0988905	0.479189	0.206371	0.836501	1
CG11723	FBgn0031391	XLOC_001903	2L	FBtr0334813;FBtr0077852	1.81226	0.123399	0.341352	0.361499	0.717726	1
CG11726	FBgn0036156	XLOC_007621	3L	FBtr0076172	0.674208	-0.194293	0.245566	-0.791208	0.428823	1
CG11737	FBgn0037592	XLOC_010466	3R	FBtr0081869;FBtr0310048;FBtr0310047	64.0957	0.867416	0.475566	1.82397	0.0681572	0.51174
CG11739	FBgn0037239	XLOC_010177	3R	FBtr0078914;FBtr0078913;FBtr0078915;FBtr0078916	20.3812	0.0987732	0.508188	0.194364	0.845891	1
CG11741	FBgn0040531	XLOC_012449	3R	FBtr0112769	0.674208	-0.194293	0.245566	-0.791208	0.428823	1
CG11752	FBgn0030292	XLOC_014923	X	FBtr0073452	11.9856	-0.124063	0.515344	-0.240739	0.809758	1
CG11753	FBgn0037603	XLOC_010476	3R	FBtr0334317;FBtr0310655;FBtr0081879	105.219	0.545973	0.38848	1.40541	0.1599	0.695766
CG11762	FBgn0037618	XLOC_010485	3R	FBtr0081912	51.801	-1.30094	0.419963	-3.09774	0.00195	1
CG11771	FBgn0039252	XLOC_011636	3R	FBtr0084748	186.346	-0.425294	0.298978	-1.42249	0.154884	0.69517
CG11777	FBgn0033527	XLOC_003806	2R	FBtr0088273	1001.2	0.219972	0.272952	0.8059	0.420301	0.913587
CG11779	FBgn0038683	XLOC_013205	3R	FBtr0335020;FBtr0083750;FBtr0083749	139.814	0.731249	0.46885	1.55967		1
CG11781	FBgn0039259	XLOC_013623	3R	FBtr0084797	9.23331	0.436325	0.504568	0.864751	0.387176	1
CG11786	FBgn0039264	XLOC_011644	3R	FBtr0113282	0.442998	0.163596	0.24015	0.681227	0.495728	1
CG11788	FBgn0034495	XLOC_004660	2R	FBtr0086277	117.292	-0.1621	0.373149	-0.434411	0.66399	0.964477
CG11790	FBgn0039265	XLOC_011645	3R	FBtr0334503;FBtr0084761;FBtr0084760	38.443	0.0656419	0.460613	0.14251	0.886677	1
CG11791	FBgn0039266	XLOC_011646	3R	FBtr0334504;FBtr0084762;FBtr0113283;FBtr0084763	56.045	0.844178	0.431763	1.95519	0.0505609	0.458926
CG11796	FBgn0036992	XLOC_009960	3L	FBtr0078226;FBtr0078225	92.0755	-0.506456	0.352949	-1.43493	0.151308	0.69517
CG11802	FBgn0030346	XLOC_016202	X	FBtr0073600	8.00523	0.407886	0.498159	0.818785	0.412909	1
CG11807	FBgn0033996	XLOC_004184	2R	FBtr0310140;FBtr0310139;FBtr0087363	5.85098	-0.267046	0.481906	-0.554147	0.579479	1
CG11808	FBgn0034000	XLOC_004188	2R	FBtr0087366	13.4784	-0.319158	0.513915	-0.621033	0.534578	1
CG11811	FBgn0036099	XLOC_007568	3L	FBtr0076265	16.9644	0.340317	0.499398	0.681454	0.495584	1
CG11815	FBgn0035299	XLOC_008661	3L	FBtr0072852	0.612556	0.176021	0.246291	0.714687	0.474802	1
CG11825	FBgn0033519	XLOC_005526	2R	FBtr0088316;FBtr0329868;FBtr0329867	10.4058	0.470179	0.515136	0.912727	0.361386	1
CG11828	FBgn0039616	XLOC_011918	3R	FBtr0308601	0.674208	-0.194293	0.245566	-0.791208	0.428823	1
CG11835	FBgn0031264	XLOC_001805	2L	FBtr0332342;FBtr0332341;FBtr0078076;FBtr0345577	65.1672	0.919131	0.391921	2.3452	0.019017	0.294467
CG11836	FBgn0039272	XLOC_011650	3R	FBtr0113284;FBtr0302405;FBtr0302406;FBtr0302404;FBtr0084768;FBtr0084767	1.9321	-0.214434	0.344418	-0.622598	0.533549	1
CG11837	FBgn0039627	XLOC_011926	3R	FBtr0085360	2.86039	0.665569	0.412223	1.61458	0.106401	1
CG11839	FBgn0039271	XLOC_011649	3R	FBtr0304718	2.94341	-0.448039	0.411677	-1.08833	0.276451	1
CG11841	FBgn0039628	XLOC_011927	3R	FBtr0085361	1.97664	0.0291916	0.341495	0.0854819	0.931878	1
CG11842	FBgn0039629	XLOC_011928	3R	FBtr0085362	1.03366	0.190544	0.252882	0.753492	0.451154	1
CG11843	FBgn0039630	XLOC_011929	3R	FBtr0346138;FBtr0085363	1.45431	-0.0955349	0.288305	-0.331367	0.740367	1
CG11851	FBgn0039293	XLOC_011666	3R	FBtr0084808	8.38852	-0.251147	0.51028	-0.492174	0.622596	1
CG11852	FBgn0039297	XLOC_011667	3R	FBtr0084809	2.94085	0.0812726	0.353876	0.229664	0.818353	1
CG11854	FBgn0039299	XLOC_011669	3R	FBtr0339259	1.60167	0.067793	0.299359	0.226461	0.820843	1
CG11857	FBgn0039303	XLOC_011672	3R	FBtr0084814	73.4092	-0.186286	0.371896	-0.500908	0.616436	0.958939
CG11858	FBgn0039305	XLOC_011674	3R	FBtr0084815	34.8831	-0.0822694	0.446946	-0.18407	0.853959	1
CG11865	FBgn0028947	XLOC_001248	2L	FBtr0080753	1.55278	-0.043159	0.295159	-0.146223	0.883745	1
CG11873	FBgn0039633	XLOC_011931	3R	FBtr0085365;FBtr0330299;FBtr0330301;FBtr0330300	71.2607	-0.096525	0.456226	-0.211573	0.83244	0.986741
CG11876	FBgn0039635	XLOC_011933	3R	FBtr0085367;FBtr0085366;FBtr0085368;FBtr0085369	111.301	-0.02072	0.374859	-0.0552742	0.95592	0.998087
CG11878	FBgn0039310	XLOC_011679	3R	FBtr0084821	74.2731	0.318563	0.391401	0.813903	0.415701	0.912063
CG11880	FBgn0039637	XLOC_011935	3R	FBtr0085371;FBtr0085373;FBtr0085372	56.6327	0.291249	0.414413	0.702798	0.482181	0.932543
CG11882	FBgn0039642	XLOC_013890	3R	FBtr0335407;FBtr0085411	1.62387	-0.0607414	0.298057	-0.203792	0.838516	1
CG11883	FBgn0033538	XLOC_003811	2R	FBtr0088284;FBtr0088283;FBtr0339461;FBtr0113063	20.4472	0.04264	0.496195	0.0859338	0.931519	1
CG11885	FBgn0031253	XLOC_001797	2L	FBtr0078089	74.3532	0.535272	0.460943	1.16125	0.245539	0.801742
CG11889;CG11891		XLOC_011678	3R	FBtr0344492;FBtr0100614;FBtr0300131;FBtr0300132	41.0366	0.351929	0.446468	0.788252	0.43055	1
CG11892	FBgn0039313	XLOC_011680	3R	FBtr0089645;FBtr0089644	231.864	0.72555	0.304885	2.37975	0.0173244	0.286141
CG11893	FBgn0039316	XLOC_011684	3R	FBtr0084827	173.871	-0.00473634	0.336524	-0.0140743	0.988771	0.998087
CG11897	FBgn0039644	XLOC_011940	3R	FBtr0085387;FBtr0085386	106.771	0.0829391	0.357823	0.231788	0.816703	0.985388
CG11898	FBgn0039645	XLOC_011941	3R	FBtr0273260	21.2822	-0.527803	0.486126	-1.08573	0.277598	1
CG11899	FBgn0014427	XLOC_011943	3R	FBtr0085390	50.6165	0.0880073	0.494049	0.178135	0.858617	1
CG11902	FBgn0028647	XLOC_011688	3R	FBtr0300735	8.56918	-0.241815	0.50314	-0.48061	0.630793	1
CG11905	FBgn0036678	XLOC_009694	3L	FBtr0113174;FBtr0305577;FBtr0075305;FBtr0075300;FBtr0113173;FBtr0075304;FBtr0075301;FBtr0075306;FBtr0075303;FBtr0075302	2.44932	-0.187652	0.340947	-0.550385	0.582056	1
CG11906	FBgn0034425	XLOC_006214	2R	FBtr0086563	2.88844	0.0698491	0.403594	0.173068	0.862598	1
CG11911	FBgn0031249	XLOC_001790	2L	FBtr0078098	294.652	0.469977	0.320468	1.46653	0.142503	0.677516
CG11912	FBgn0031248	XLOC_001789	2L	FBtr0078099	70.5372	-0.741417	0.399467	-1.85602	0.0634513	0.498556
CG11913	FBgn0039331	XLOC_011690	3R	FBtr0273265	94.2256	-0.460516	0.357339	-1.28874	0.197489	0.744015
CG11920	FBgn0039274	XLOC_011651	3R	FBtr0084769	2.04467	0.130744	0.321556	0.406598	0.684303	1
CG11927	FBgn0031638	XLOC_000418	2L	FBtr0077386	121.823	0.38532	0.357554	1.07766	0.281188	0.821997
CG11951	FBgn0039656	XLOC_013898	3R	FBtr0306020;FBtr0085403	74.4523	0.660544	0.401537	1.64504	0.0999619	0.585301
CG11961	FBgn0034436	XLOC_004577	2R	FBtr0086519;FBtr0086520;FBtr0308495	74.6307	0.177138	0.403046	0.439497	0.660301	0.963487
CG11964	FBgn0037644	XLOC_012483	3R	FBtr0082015	32.7798	0.188157	0.471007	0.399477	0.689542	1
CG11970	FBgn0027503	XLOC_010502	3R	FBtr0346139;FBtr0081959	18.8679	-0.26047	0.509384	-0.511342	0.609111	1
CG11975	FBgn0037648	XLOC_010503	3R	FBtr0081960;FBtr0336753	6.81124	-0.51283	0.491312	-1.0438	0.296579	1
CG11977	FBgn0037650	XLOC_010504	3R	FBtr0300742	3.35613	-0.17218	0.389488	-0.442066	0.658441	1
CG11980	FBgn0037652	XLOC_010505	3R	FBtr0081963;FBtr0081962;FBtr0081964	99.7108	0.263354	0.417936	0.630129	0.52861	0.93778
CG11982	FBgn0037653	XLOC_010506	3R	FBtr0081965	13.4515	-0.227798	0.514774	-0.442519	0.658113	1
CG11983	FBgn0037654	XLOC_010507	3R	FBtr0081966;FBtr0336754	29.4638	-0.273865	0.505214	-0.542078	0.587765	1
CG11984	FBgn0037655	XLOC_012489	3R	FBtr0300745;FBtr0300748;FBtr0300747;FBtr0300744;FBtr0300746;FBtr0300743	78.0485	0.213753	0.37691	0.567121	0.570632	0.949003
CG11985	FBgn0040534	XLOC_012490	3R	FBtr0082006	13.2887	-0.705758	0.513567	-1.37423	0.169371	1
CG11986	FBgn0037656	XLOC_010508	3R	FBtr0081967	21.1636	-0.0696279	0.510021	-0.13652	0.89141	1
CG11997	FBgn0037662	XLOC_010514	3R	FBtr0081972	51.1743	-0.711307	0.434763	-1.63608	0.101823	1
CG11999	FBgn0037312	XLOC_012208	3R	FBtr0078807	10.3304	0.585003	0.485696	1.20446	0.228411	1
CG12003	FBgn0035234	XLOC_006959	3L	FBtr0072744	203.42	-0.19836	0.289028	-0.686302	0.492523	0.932543
CG12004	FBgn0035236	XLOC_006960	3L	FBtr0072745;FBtr0113122;FBtr0345367;FBtr0072746	83.2033	-0.807983	0.456209	-1.77108	0.0765473	0.542775
CG12006	FBgn0035464	XLOC_007113	3L	FBtr0073150;FBtr0073149	70.8668	0.0466825	0.418906	0.111439	0.911268	0.992493
CG12007	FBgn0037293	XLOC_010213	3R	FBtr0078842	32.0954	0.0990414	0.451836	0.219198	0.826496	1
CG12009	FBgn0035430	XLOC_007082	3L	FBtr0308314;FBtr0073053	74.1806	-0.0988586	0.39208	-0.252139	0.800934	0.984979
CG12010	FBgn0035443	XLOC_007095	3L	FBtr0073075	10.6988	-0.076097	0.514818	-0.147813	0.88249	1
CG12012	FBgn0035444	XLOC_007096	3L	FBtr0300749;FBtr0073076;FBtr0346532	10.5464	0.590885	0.505458	1.16901	0.2424	1
CG12014	FBgn0035445	XLOC_007097	3L	FBtr0073077	9.78211	0.392127	0.48929	0.801421	0.422888	1
CG12016	FBgn0035436	XLOC_007089	3L	FBtr0300240;FBtr0073064	135.537	0.0444127	0.327105	0.135775	0.891999	0.992493
CG12017	FBgn0035429	XLOC_007081	3L	FBtr0308312;FBtr0308313;FBtr0308311;FBtr0073052	2.44932	-0.187652	0.340947	-0.550385	0.582056	1
CG12018	FBgn0027903	XLOC_006978	3L	FBtr0072775	45.0374	-0.804737	0.468081	-1.71923	0.085573	1
CG12024	FBgn0035283	XLOC_006986	3L	FBtr0303152;FBtr0072833;FBtr0072832	72.3363	0.177156	0.377991	0.468677	0.639301	0.962354
CG12025	FBgn0035285	XLOC_006987	3L	FBtr0072834;FBtr0332668;FBtr0345381	33.6227	-0.388794	0.459896	-0.845395	0.397891	1
CG12034	FBgn0035421	XLOC_007072	3L	FBtr0073043	100.715	0.168093	0.402014	0.418127	0.675854	0.969394
CG12035	FBgn0035263	XLOC_006973	3L	FBtr0072766	323.761	-0.276231	0.313093	-0.882267	0.377633	0.8868
CG12038	FBgn0035179	XLOC_006909	3L	FBtr0072619	20.7221	-0.104196	0.503178	-0.207075	0.835951	1
CG12042	FBgn0033206	XLOC_005292	2R	FBtr0088944	537.147	-0.211691	0.344138	-0.615134	0.538466	0.939274
CG12050	FBgn0032915	XLOC_003275	2L	FBtr0114615	8.36101	0.671686	0.51264	1.31025	0.190112	1
CG12054	FBgn0039831	XLOC_012077	3R	FBtr0085758;FBtr0335409;FBtr0335408;FBtr0113312	91.8699	-0.0966694	0.398499	-0.242584	0.808328	0.985388
CG12056	FBgn0030099	XLOC_014814	X	FBtr0071305	4.24461	0.924392	0.452556	2.0426	0.0410916	1
CG12057	FBgn0030098	XLOC_014813	X	FBtr0332623;FBtr0071304	1434.1	0.225519	0.275849	0.817545	0.413617	0.909762
CG12061	FBgn0040031	XLOC_015532	X	FBtr0333740;FBtr0332625	17.9234	-0.943328	0.51297	-1.83895	0.065922	1
CG12065	FBgn0030052	XLOC_014780	X	FBtr0071216;FBtr0300750;FBtr0300751;FBtr0071217;FBtr0071215;FBtr0071214	76.6623	0.555158	0.408963	1.35748	0.174629	0.712295
CG12071	FBgn0039808	XLOC_014039	3R	FBtr0344716;FBtr0346758	5.5053	-0.196929	0.455027	-0.432786	0.665171	1
CG12075	FBgn0030065	XLOC_014792	X	FBtr0307271;FBtr0335035;FBtr0071253;FBtr0335034;FBtr0071254	30.1189	0.392897	0.461243	0.851823	0.394312	1
CG12078	FBgn0035426	XLOC_008741	3L	FBtr0308063;FBtr0073092	0.612556	0.176021	0.246291	0.714687	0.474802	1
CG12081	FBgn0030053	XLOC_014781	X	FBtr0071218;FBtr0332626	23.6214	0.36712	0.497863	0.737392	0.460884	1
CG12082	FBgn0035402	XLOC_008721	3L	FBtr0307308;FBtr0073114	41.6086	0.0556914	0.463719	0.120097	0.904406	1
CG12084	FBgn0043458	XLOC_008604	3L	FBtr0332656;FBtr0072711	25.633	-0.258613	0.4768	-0.542393	0.587548	1
CG12090	FBgn0035227	XLOC_008608	3L	FBtr0072705;FBtr0333402;FBtr0333401;FBtr0072704;FBtr0072703	70.5967	0.185047	0.37394	0.494857	0.620701	0.958939
CG12091	FBgn0035228	XLOC_008610	3L	FBtr0333400;FBtr0072831	41.3214	-0.114096	0.441451	-0.258456	0.796055	1
CG12093	FBgn0035372	XLOC_008702	3L	FBtr0073015	3.49778	-0.175373	0.423823	-0.413788	0.67903	1
CG12096	FBgn0030457	XLOC_015034	X	FBtr0073727;FBtr0340298;FBtr0340299	76.5116	-0.959996	0.452708	-2.12056	0.0339585	0.388449
CG12099	FBgn0035232	XLOC_008613	3L	FBtr0072829;FBtr0072828	119.416	0.387924	0.329735	1.17647	0.239406	0.79425
CG12104	FBgn0035238	XLOC_008615	3L	FBtr0333360;FBtr0344803;FBtr0072825	113.661	0.00398439	0.358777	0.0111055	0.991139	0.998087
CG12105	FBgn0035241	XLOC_008616	3L	FBtr0072824	2.65085	-0.0944062	0.38985	-0.24216	0.808656	1
CG12106	FBgn0030100	XLOC_014815	X	FBtr0071306	603.084	0.121342	0.273972	0.4429	0.657838	0.963487
CG12107	FBgn0033209	XLOC_003561	2R	FBtr0088924	18.0851	0.545356	0.506464	1.07679	0.281573	1
CG12111	FBgn0030050	XLOC_016018	X	FBtr0331726;FBtr0071232	46.0099	-0.505592	0.424953	-1.18976	0.234141	1
CG12112	FBgn0030048	XLOC_016017	X	FBtr0331727;FBtr0071233	68.6902	0.0393762	0.433215	0.0908928	0.927578	0.995376
CG12115	FBgn0030097	XLOC_016050	X	FBtr0071341	1.01101	-0.032415	0.257769	-0.125752	0.899928	1
CG12116	FBgn0030041	XLOC_016013	X	FBtr0071240	7.26284	0.211816	0.493917	0.428848	0.668034	1
CG12118	FBgn0030101	XLOC_016051	X	FBtr0071340;FBtr0071339	86.465	-0.00479901	0.366389	-0.0130981	0.98955	0.998087
CG12119	FBgn0030102	XLOC_016053	X	FBtr0071336;FBtr0340494	245.971	0.241756	0.404277	0.597996	0.549843	0.945237
CG12121	FBgn0030109	XLOC_016055	X	FBtr0071334	25.2923	-0.383849	0.508684	-0.754593	0.450493	1
CG12123	FBgn0030039	XLOC_016007	X	FBtr0071245	29.5017	0.649943	0.483277	1.34487	0.178669	1
CG12125	FBgn0030037	XLOC_016006	X	FBtr0071246;FBtr0345986;FBtr0300383	538.373	0.0887231	0.301694	0.294083	0.768695	0.978361
CG12128	FBgn0033473	XLOC_003774	2R	FBtr0088393;FBtr0088394	784.26	-0.41082	0.252516	-1.62691	0.103757	0.593495
CG12129	FBgn0033475	XLOC_003775	2R	FBtr0088395	49.9191	0.443272	0.428942	1.03341	0.301414	1
CG1213	FBgn0037387	XLOC_010272	3R	FBtr0078642;FBtr0078644;FBtr0305954;FBtr0078643	79.0455	0.0116679	0.373145	0.0312692	0.975055	0.998087
CG12134	FBgn0033471	XLOC_003771	2R	FBtr0088389;FBtr0088388	2.29777	-0.0440709	0.382844	-0.115115	0.908354	1
CG12147	FBgn0037325	XLOC_012217	3R	FBtr0078793	0.674208	-0.194293	0.245566	-0.791208	0.428823	1
CG12155	FBgn0029957	XLOC_014724	X	FBtr0071071	7.89938	-0.203589	0.508025	-0.400745	0.688608	1
CG12158	FBgn0040775	XLOC_005440	2R	FBtr0088557	0.612556	0.176021	0.246291	0.714687	0.474802	1
CG12159	FBgn0033232	XLOC_005310	2R	FBtr0088889;FBtr0088888	4.05472	0.530367	0.445767	1.18978	0.234132	1
CG12162	FBgn0037329	XLOC_010233	3R	FBtr0078680;FBtr0078681	119.486	-0.46422	0.342585	-1.35505	0.175401	0.712295
CG12163	FBgn0260462	XLOC_012201	3R	FBtr0078823;FBtr0078822;FBtr0303994	128.407	-0.247415	0.331344	-0.746703	0.455243	0.932543
CG12164	FBgn0033158	XLOC_003533	2R	FBtr0088963;FBtr0345800	1.91846	0.118909	0.342876	0.3468	0.728741	1
CG12170	FBgn0037356	XLOC_010252	3R	FBtr0078709	20.6417	0.0873075	0.50332	0.173463	0.862287	1
CG12171	FBgn0037354	XLOC_010251	3R	FBtr0078708	41.5528	0.223358	0.423976	0.526817	0.598321	1
CG12173	FBgn0037305	XLOC_012203	3R	FBtr0078821	8.10962	0.534673	0.513225	1.04179	0.297509	1
CG12177	FBgn0030510	XLOC_016290	X	FBtr0073846;FBtr0340399;FBtr0346119	25.2719	0.291903	0.504655	0.57842	0.56298	1
CG12179	FBgn0025388	XLOC_015786	X	FBtr0300755;FBtr0300754	6.97655	0.273964	0.494595	0.553917	0.579636	1
CG1218	FBgn0037377	XLOC_010266	3R	FBtr0078630	102.841	-0.564556	0.404592	-1.39537	0.162904	0.70114
CG12182	FBgn0028504	XLOC_008694	3L	FBtr0344989;FBtr0332040;FBtr0072955	578.317	-0.538896	0.296217	-1.81926	0.0688713	0.513169
CG12184	FBgn0025387	XLOC_015785	X	FBtr0343532;FBtr0335037;FBtr0070696	16.0507	-0.12392	0.512967	-0.241576	0.809109	1
CG12194	FBgn0031636	XLOC_000417	2L	FBtr0300756;FBtr0077385;FBtr0332476	47.1634	0.0835723	0.41397	0.20188	0.84001	1
CG12200	FBgn0031018	XLOC_015396	X	FBtr0074710	13.6343	0.398812	0.515362	0.773848	0.439021	1
CG12203	FBgn0031021	XLOC_015398	X	FBtr0074712	92.3653	0.419153	0.378411	1.10767	0.268005	0.815573
CG12204	FBgn0031022	XLOC_016672	X	FBtr0074783	311.932	0.380221	0.346297	1.09796	0.272222	0.816338
CG12206	FBgn0029662	XLOC_015736	X	FBtr0070529;FBtr0070528;FBtr0070527	120.394	-0.418832	0.367301	-1.1403	0.254162	0.806231
CG12207	FBgn0038220	XLOC_010883	3R	FBtr0344157;FBtr0082921;FBtr0309999;FBtr0082922;FBtr0082923;FBtr0309997;FBtr0309998	62.6179	-0.0277075	0.43966	-0.0630203	0.94975	0.998087
CG12209	FBgn0033498	XLOC_005509	2R	FBtr0088364	2.65085	-0.0944062	0.38985	-0.24216	0.808656	1
CG12213	FBgn0260742	XLOC_012703	3R	FBtr0334156;FBtr0113223;FBtr0334155;FBtr0082510	22.8893	0.816708	0.504547	1.6187	0.105513	1
CG12219	FBgn0043796	XLOC_015882	X	FBtr0070925	7.20885	0.55605	0.501154	1.10954	0.267197	1
CG12224	FBgn0037974	XLOC_012708	3R	FBtr0306697;FBtr0335436	19.1377	-0.444084	0.494176	-0.898635	0.368847	1
CG12229	FBgn0036723	XLOC_009727	3L	FBtr0075226	55.3352	-0.44064	0.478749	-0.920398	0.357365	0.873384
CG12231	FBgn0031026	XLOC_016676	X	FBtr0074779	7.34728	-0.125066	0.471427	-0.265292	0.790785	1
CG12236	FBgn0029822	XLOC_014618	X	FBtr0070826;FBtr0070825	101.061	0.339062	0.353782	0.958392	0.337865	0.863709
CG12237	FBgn0031048	XLOC_016687	X	FBtr0074761	28.114	0.488516	0.478316	1.02133	0.3071	1
CG12239	FBgn0029810	XLOC_014606	X	FBtr0070814	0.612556	0.176021	0.246291	0.714687	0.474802	1
CG12241	FBgn0038304	XLOC_010929	3R	FBtr0083051	13.0972	0.51662	0.513658	1.00577	0.314527	1
CG12253	FBgn0026148	XLOC_000940	2L	FBtr0080149	0.612556	0.176021	0.246291	0.714687	0.474802	1
CG12259	FBgn0039557	XLOC_013829	3R	FBtr0085270	15.027	-0.357129	0.513523	-0.695449	0.486774	1
CG12262	FBgn0035811	XLOC_007356	3L	FBtr0076808	130.736	-0.146695	0.354922	-0.413316	0.679375	0.969394
CG12263	FBgn0034346	XLOC_004512	2R	FBtr0086691	169.292	-0.582595	0.356841	-1.63265	0.102543	0.588433
CG12264	FBgn0032393	XLOC_001009	2L	FBtr0080290	225.227	0.187747	0.357443	0.525251	0.599409	0.957465
CG12267	FBgn0038057	XLOC_010774	3R	FBtr0303028;FBtr0082635	19.8746	-0.904836	0.499528	-1.81138	0.070082	1
CG12268	FBgn0039131	XLOC_013535	3R	FBtr0308071;FBtr0084514;FBtr0084513	74.5147	-0.64316	0.425077	-1.51304		1
CG12269	FBgn0038665	XLOC_013195	3R	FBtr0304691;FBtr0083722	0.56801	-0.194549	0.245753	-0.791644	0.428568	1
CG1227	FBgn0037491	XLOC_012351	3R	FBtr0339736;FBtr0081598	11.697	0.121565	0.515365	0.235881	0.813525	1
CG12272	FBgn0036571	XLOC_007947	3L	FBtr0333292;FBtr0301912;FBtr0075452	690.245	0.119301	0.25708	0.464061	0.642604	0.962354
CG12278	FBgn0038847	XLOC_011337	3R	FBtr0084003	6.45483	0.204769	0.48889	0.418845	0.675329	1
CG12279	FBgn0038080	XLOC_010791	3R	FBtr0082656	43.318	-0.28661	0.430107	-0.66637	0.505174	1
CG12288	FBgn0032620	XLOC_003002	2L	FBtr0080957	73.9195	-0.14152	0.394949	-0.358325	0.7201	0.972543
CG12290	FBgn0039419	XLOC_011757	3R	FBtr0339612	43.813	0.339469	0.431908	0.785976	0.431882	1
CG12299	FBgn0032295	XLOC_000923	2L	FBtr0080113	12.0227	0.30875	0.51376	0.600962	0.547865	1
CG12301	FBgn0036514	XLOC_007897	3L	FBtr0075564	14.0648	0.0880439	0.496002	0.177507	0.85911	1
CG12304	FBgn0036515	XLOC_007898	3L	FBtr0075566;FBtr0075565	7.99584	0.224566	0.477973	0.46983	0.638476	1
CG12309	FBgn0033542	XLOC_003815	2R	FBtr0088215	18.7113	-0.937998	0.510699	-1.8367	0.0662549	1
CG1231	FBgn0035134	XLOC_006867	3L	FBtr0072546	7.81865	0.627967	0.503695	1.24672	0.2125	1
CG12316	FBgn0036483	XLOC_009554	3L	FBtr0075652;FBtr0075651	12.7102	-0.0275708	0.502984	-0.0548144	0.956286	1
CG12320	FBgn0038590	XLOC_013146	3R	FBtr0347215	77.2428	0.564252	0.399284	1.41316	0.157608	0.69517
CG12321	FBgn0038577	XLOC_013139	3R	FBtr0083616	32.2394	0.164308	0.474107	0.346563	0.72892	1
CG12325	FBgn0033557	XLOC_003825	2R	FBtr0345930;FBtr0088227	10.9637	-0.920111	0.49688	-1.85178	0.064058	1
CG1233	FBgn0035137	XLOC_006869	3L	FBtr0072549;FBtr0072548	18.6639	0.491638	0.510275	0.963477	0.335308	1
CG12333	FBgn0038617	XLOC_013164	3R	FBtr0083655	10.7181	-0.443335	0.515142	-0.860608	0.389454	1
CG12338	FBgn0033543	XLOC_005541	2R	FBtr0088256;FBtr0345662	7.5201	-0.213146	0.445619	-0.478315	0.632426	1
CG1234	FBgn0037489	XLOC_012350	3R	FBtr0081599	6.43569	0.199173	0.487696	0.408396	0.682983	1
CG12341	FBgn0033550	XLOC_005548	2R	FBtr0088251	4.46003	0.120556	0.441563	0.273021	0.784837	1
CG12343	FBgn0033556	XLOC_005551	2R	FBtr0088247	35.8638	1.01941	0.468279	2.17692	0.0294864	1
CG12344	FBgn0033558	XLOC_005552	2R	FBtr0339476;FBtr0088246;FBtr0339478;FBtr0339477	12.1611	0.641827	0.512024	1.25351	0.21002	1
CG12347	FBgn0038558	XLOC_011145	3R	FBtr0083519;FBtr0308497	1.28676	-0.00592986	0.277179	-0.0213936	0.982932	1
CG12355	FBgn0040805	XLOC_009563	3L	FBtr0075606;FBtr0113333;FBtr0334086;FBtr0300758	4.62216	0.335764	0.443551	0.756992	0.449055	1
CG1236	FBgn0037370	XLOC_010261	3R	FBtr0078721	5.19611	-0.14898	0.447896	-0.332623	0.739419	1
CG12360	FBgn0038111	XLOC_012791	3R	FBtr0082718;FBtr0082717;FBtr0113229	88.8506	-0.23296	0.378882	-0.614862	0.538646	0.939274
CG12362	FBgn0036082	XLOC_007554	3L	FBtr0076282;FBtr0076281	0.612556	0.176021	0.246291	0.714687	0.474802	1
CG12374	FBgn0033774	XLOC_004006	2R	FBtr0087854	2528.27	0.107851	0.300117	0.359363	0.719323	0.972543
CG12375	FBgn0031987	XLOC_002383	2L	FBtr0079642	20.1826	-0.139033	0.508496	-0.273421	0.78453	1
CG12379	FBgn0030676	XLOC_016415	X	FBtr0273278	68.4007	-0.5749	0.385173	-1.49257	0.135549	0.664076
CG12384	FBgn0033624	XLOC_005599	2R	FBtr0088155	117.537	0.163256	0.325719	0.501216	0.616219	0.958939
CG1239	FBgn0037368	XLOC_010260	3R	FBtr0343989;FBtr0343988;FBtr0078720	1.11721	-0.0395778	0.264294	-0.149749	0.880963	1
CG12391	FBgn0033581	XLOC_005566	2R	FBtr0088205	10.4201	0.816188	0.512832	1.59153	0.11149	1
CG12393	FBgn0031768	XLOC_000526	2L	FBtr0079183;FBtr0079184;FBtr0343120	185.386	-0.0450859	0.315801	-0.142767	0.886474	0.992493
CG12395	FBgn0030722	XLOC_016445	X	FBtr0074260	1.3059	-0.000464354	0.279318	-0.00166246	0.998674	1
CG12398	FBgn0030596	XLOC_016358	X	FBtr0073976	51.5353	-0.25259	0.428192	-0.589898	0.555259	1
CG12400	FBgn0031505	XLOC_002000	2L	FBtr0329905;FBtr0077617	17.0124	0.274829	0.51506	0.533587	0.593627	1
CG12402	FBgn0038202	XLOC_012862	3R	FBtr0082914	0.442998	0.163596	0.24015	0.681227	0.495728	1
CG12404	FBgn0032465	XLOC_002742	2L	FBtr0080430	4.91263	-0.0944542	0.435659	-0.216808	0.828358	1
CG12413	FBgn0039588	XLOC_013858	3R	FBtr0085293	5.38721	-0.569958	0.473874	-1.20276	0.229068	1
CG12428	FBgn0039543	XLOC_013824	3R	FBtr0085240;FBtr0085239;FBtr0085238;FBtr0085236	84.5784	0.266244	0.376826	0.706545	0.479849	0.932543
CG12439	FBgn0032094	XLOC_000760	2L	FBtr0340592;FBtr0079767	0.612556	0.176021	0.246291	0.714687	0.474802	1
CG12446	FBgn0031201	XLOC_016848	X	FBtr0077343	6.94078	-0.353338	0.46854	-0.754127	0.450773	1
CG1246	FBgn0035360	XLOC_007030	3L	FBtr0333446;FBtr0303022;FBtr0072938;FBtr0345027	75.659	0.576368	0.403082	1.4299	0.152745	0.69517
CG12464	FBgn0033861	XLOC_005793	2R	FBtr0087652	2.95738	0.0704864	0.375908	0.18751	0.851261	1
CG12470	FBgn0040371	XLOC_014317	X	FBtr0070069	2.66999	-0.0879485	0.392332	-0.224169	0.822626	1
CG12483	FBgn0040688	XLOC_008503	3L	FBtr0072540	4.45151	-0.151777	0.441851	-0.343502	0.731221	1
CG12484	FBgn0086604	XLOC_004674	2R	FBtr0112774;FBtr0342690;FBtr0273284;FBtr0112775	154.476	-0.355801	0.503823	-0.706203	0.480062	0.932543
CG12490	FBgn0034782	XLOC_004890	2R	FBtr0302717	0.442998	0.163596	0.24015	0.681227	0.495728	1
CG12493	FBgn0035571	XLOC_008848	3L	FBtr0332742;FBtr0073363	34.0203	0.973454	0.487941	1.99503	0.0460401	1
CG12496	FBgn0040385	XLOC_015688	X	FBtr0070462	61.6211	-0.154891	0.444927	-0.348127	0.727745	0.972543
CG12499	FBgn0038968	XLOC_013408	3R	FBtr0084295	14.3012	-0.03482	0.514961	-0.0676166	0.946091	1
CG12502	FBgn0035171	XLOC_006898	3L	FBtr0300345;FBtr0339892;FBtr0304699	11.6543	-0.383031	0.515163	-0.743514	0.45717	1
CG12506	FBgn0031276	XLOC_000113	2L	FBtr0078003	7.28179	-0.654996	0.472581	-1.386	0.165747	1
CG12512	FBgn0031703	XLOC_002161	2L	FBtr0079077	21.8315	0.728256	0.509848	1.42838	0.153183	1
CG12519	FBgn0036872	XLOC_008175	3L	FBtr0074930;FBtr0333844	0.674208	-0.194293	0.245566	-0.791208	0.428823	1
CG12520	FBgn0036324	XLOC_009421	3L	FBtr0343628;FBtr0113169	2.14921	-0.368123	0.323663	-1.13736	0.255386	1
CG12522	FBgn0036131	XLOC_007597	3L	FBtr0076209	3.37322	0.328294	0.394297	0.832606	0.405067	1
CG12523	FBgn0036102	XLOC_007573	3L	FBtr0339801	4.06158	0.3201	0.465254	0.688012	0.491446	1
CG12531	FBgn0031064	XLOC_015428	X	FBtr0335043;FBtr0074788	1.61614	0.333904	0.320706	1.04115	0.297805	1
CG12535	FBgn0029657	XLOC_015731	X	FBtr0344078;FBtr0332303;FBtr0332304;FBtr0332302;FBtr0070534	2583.97	0.277041	0.29569	0.936931	0.348794	0.869575
CG12539	FBgn0030586	XLOC_016348	X	FBtr0073987	146.045	-0.333138	0.372414	-0.894536	0.371035	0.883827
CG12541	FBgn0029930	XLOC_015928	X	FBtr0343324;FBtr0300760	1.62387	-0.0607414	0.298057	-0.203792	0.838516	1
CG12547	FBgn0250830	XLOC_005137	2R	FBtr0329829;FBtr0111273;FBtr0345222	26.0154	-0.0718852	0.48343	-0.148698	0.881792	1
CG12560	FBgn0031974	XLOC_002374	2L	FBtr0343383;FBtr0300761	11.916	0.550449	0.515189	1.06844	0.285322	1
CG12567	FBgn0039958	XLOC_003386	2L	FBtr0300702;FBtr0344847;FBtr0300703;FBtr0113705;FBtr0113704;FBtr0300704	17.1898	-0.411469	0.514104	-0.800361	0.423502	1
CG12576	FBgn0031190	XLOC_016840	X	FBtr0077366;FBtr0335046;FBtr0077365;FBtr0346429	154.926	-0.312248	0.320282	-0.974916	0.329602	0.855067
CG12581	FBgn0037213	XLOC_010157	3R	FBtr0078962;FBtr0078961	16.5408	1.00993	0.505635	1.99735	0.0457876	1
CG12582	FBgn0037215	XLOC_010159	3R	FBtr0336703;FBtr0336704;FBtr0306022;FBtr0078964;FBtr0336702	35.1416	0.111917	0.444076	0.252021	0.801025	1
CG12589	FBgn0040684	XLOC_012194	3R	FBtr0339316;FBtr0078843;FBtr0339317	2.24783	0.435276	0.354778	1.2269	0.219862	1
CG12592	FBgn0037811	XLOC_010607	3R	FBtr0082233	3.5751	-0.295384	0.448001	-0.659339	0.509678	1
CG12605	FBgn0035481	XLOC_008782	3L	FBtr0333137;FBtr0073168;FBtr0073167;FBtr0333138;FBtr0073166	9.14821	0.694898	0.48716	1.42643	0.153745	1
CG12608	FBgn0030630	XLOC_016387	X	FBtr0074018	17.6984	-0.34155	0.515366	-0.662734	0.507501	1
CG12643	FBgn0040942	XLOC_016107	X	FBtr0071481	6.57919	0.941314	0.490097	1.92067	0.0547737	1
CG12645	FBgn0030181	XLOC_014861	X	FBtr0332895;FBtr0112973	4.31621	0.225324	0.459815	0.490033	0.624111	1
CG1265	FBgn0035517	XLOC_007154	3L	FBtr0073228	106.949	-0.166783	0.358104	-0.465741	0.641401	0.962354
CG12655	FBgn0031080	XLOC_016728	X	FBtr0070036	2.20785	-0.170981	0.350243	-0.488179	0.625423	1
CG12659	FBgn0040929	XLOC_016020	X	FBtr0332627	11.9964	0.175038	0.503402	0.34771	0.728058	1
CG12661	FBgn0030071	XLOC_016033	X	FBtr0333603	46.954	-0.928331	0.471952	-1.967	0.049183	1
CG12662	FBgn0030074	XLOC_016035	X	FBtr0071264	32.5306	-0.02024	0.490901	-0.0412303	0.967112	1
CG12672	FBgn0030886	XLOC_016579	X	FBtr0074539	1.91846	0.118909	0.342876	0.3468	0.728741	1
CG12674	FBgn0031388	XLOC_000207	2L	FBtr0334779;FBtr0077827	8.02867	0.513209	0.476933	1.07606	0.281901	1
CG12680	FBgn0029740	XLOC_014569	X	FBtr0300018;FBtr0343530	4.64658	0.743153	0.423502	1.75478	0.0792968	1
CG12681	FBgn0029730	XLOC_014563	X	FBtr0070717	2.25353	-0.495338	0.361411	-1.37057	0.170509	1
CG12692	FBgn0029703	XLOC_015768	X	FBtr0345705;FBtr0070658	15.6717	0.556133	0.499477	1.11343	0.265524	1
CG12693	FBgn0029705	XLOC_015772	X	FBtr0070654	86.2202	0.0631792	0.376407	0.167848	0.866703	0.992493
CG12698	FBgn0030721	XLOC_015219	X	FBtr0074139	82.1554	-0.17931	0.413505	-0.433634	0.664554	0.964836
CG12702	FBgn0031070	XLOC_016702	X	FBtr0074809;FBtr0335137;FBtr0346378	680.901	-0.695495	0.251857	-2.76147	0.00575415	0.154118
CG12708	FBgn0030666	XLOC_015174	X	FBtr0289961;FBtr0074052	0.442998	0.163596	0.24015	0.681227	0.495728	1
CG1271	FBgn0035392	XLOC_007049	3L	FBtr0072989;FBtr0072986;FBtr0072988;FBtr0072987	14.5257	-0.0925684	0.514901	-0.179779	0.857326	1
CG12713	FBgn0036536	XLOC_007919	3L	FBtr0075506	18.8163	-0.192611	0.505285	-0.381193	0.70306	1
CG12717	FBgn0030420	XLOC_016243	X	FBtr0346120;FBtr0073704	9.83294	-0.267825	0.515292	-0.519753	0.603236	1
CG12721	FBgn0030373	XLOC_016223	X	FBtr0073637	1.03366	0.190544	0.252882	0.753492	0.451154	1
CG12723	FBgn0030459	XLOC_016265	X	FBtr0073738	1.05555	0.229201	0.274766	0.834167	0.404187	1
CG12725	FBgn0030483	XLOC_016279	X	FBtr0073788	15.7535	-0.292662	0.514352	-0.568991	0.569362	1
CG12728	FBgn0029825	XLOC_014621	X	FBtr0070859;FBtr0343052	10.6401	-0.592375	0.508335	-1.16532	0.243888	1
CG1273	FBgn0035522	XLOC_007157	3L	FBtr0073231	0.631692	0.177839	0.247149	0.719562	0.471795	1
CG12730	FBgn0029771	XLOC_014590	X	FBtr0345785;FBtr0070780	14.9145	-0.57679	0.513083	-1.12417	0.260943	1
CG12736	FBgn0033184	XLOC_005273	2R	FBtr0088981	225.282	0.116302	0.316328	0.367662	0.713126	0.972543
CG12744	FBgn0033459	XLOC_003761	2R	FBtr0088378;FBtr0088377	5.02118	0.235454	0.47888	0.491677	0.622948	1
CG12746	FBgn0037341	XLOC_010239	3R	FBtr0078692;FBtr0078689;FBtr0290215	77.2368	-0.1258	0.380096	-0.330969	0.740668	0.972543
CG1275	FBgn0035321	XLOC_008677	3L	FBtr0072907;FBtr0072908;FBtr0072905;FBtr0072906	21.7247	1.08339	0.493849	2.19376	0.0282525	1
CG12766	FBgn0035476	XLOC_008778	3L	FBtr0073172	22.9729	-1.07667	0.485168	-2.21917	0.0264751	1
CG12768	FBgn0037206	XLOC_008457	3L	FBtr0331396;FBtr0331398;FBtr0078560;FBtr0331397	4.82084	-0.266271	0.466146	-0.571218	0.567852	1
CG12769	FBgn0033252	XLOC_005329	2R	FBtr0339281;FBtr0088827;FBtr0088828	3.35128	-0.364547	0.396595	-0.919192	0.357995	1
CG12772	FBgn0030055	XLOC_014783	X	FBtr0071221;FBtr0331728	16.5319	-0.24334	0.507389	-0.479593	0.631517	1
CG12773	FBgn0024365	XLOC_015614	X	FBtr0342738;FBtr0332287;FBtr0070235	170.417	-0.0988799	0.310701	-0.318248	0.750297	0.974841
CG12780	FBgn0033301	XLOC_005374	2R	FBtr0088736	33.6258	0.6035	0.467405	1.29117	0.196644	1
CG12783;CG10340		XLOC_013045	3R	FBtr0331688;FBtr0331687;FBtr0083358	16.3249	0.00147107	0.505074	0.00291259	0.997676	1
CG12788	FBgn0031041	XLOC_016683	X	FBtr0332487;FBtr0100291;FBtr0344071	242.079	-0.165874	0.31573	-0.525366	0.599329	0.957465
CG12795	FBgn0031535	XLOC_000317	2L	FBtr0113019	32.8871	-0.279431	0.472789	-0.591026	0.554503	1
CG12796	FBgn0029909	XLOC_015918	X	FBtr0070973	58.4094	-0.739924	0.425956	-1.73709	0.0823712	0.548772
CG12811	FBgn0037779	XLOC_012576	3R	FBtr0082204	4.39152	0.609759	0.458161	1.33088	0.183227	1
CG12814	FBgn0037796	XLOC_012589	3R	FBtr0337018;FBtr0337019;FBtr0306090;FBtr0110786	8.0494	0.156399	0.504172	0.310209	0.756402	1
CG12817	FBgn0037798	XLOC_012591	3R	FBtr0110952	2.05711	-0.466273	0.353542	-1.31886	0.187215	1
CG12818	FBgn0037809	XLOC_010605	3R	FBtr0082230	1.3059	-0.000464354	0.279318	-0.00166246	0.998674	1
CG12822;Atg10		XLOC_003578	2R	FBtr0088842;FBtr0088841;FBtr0113331;FBtr0340658	144.68	-0.279863	0.356786	-0.784398	0.432807	0.914315
CG12824	FBgn0033222	XLOC_003572	2R	FBtr0113050;FBtr0088830	9.10297	0.140737	0.504151	0.279157	0.780124	1
CG12825	FBgn0033221	XLOC_003571	2R	FBtr0088829	63.1573	-0.582336	0.418158	-1.39262	0.163734	0.702425
CG12828	FBgn0033145	XLOC_005245	2R	FBtr0112770	0.674208	-0.194293	0.245566	-0.791208	0.428823	1
CG12831;tRNA:CR30299		XLOC_005242	2R	FBtr0345466;FBtr0089058;FBtr0300063	2.11361	0.169142	0.353254	0.478812	0.632073	1
CG12848	FBgn0040666	XLOC_006802	2R	FBtr0310371;FBtr0072437	8.25115	0.234139	0.487572	0.480214	0.631075	1
CG12851	FBgn0035086	XLOC_005097	2R	FBtr0300763;FBtr0343503;FBtr0345514	131.953	-0.165053	0.357742	-0.461373	0.644531	0.962354
CG12853	FBgn0040747	XLOC_004171	2R	FBtr0087406	10.8902	-0.0746866	0.512381	-0.145764	0.884108	1
CG12857	FBgn0033963	XLOC_005868	2R	FBtr0329881;FBtr0087469	4.77704	0.129959	0.421856	0.308066	0.758032	1
CG12859	FBgn0033961	XLOC_004159	2R	FBtr0087440	16.2404	-0.0478381	0.510399	-0.093727	0.925326	1
CG12860	FBgn0033954	XLOC_005860	2R	FBtr0087480	0.56801	-0.194549	0.245753	-0.791644	0.428568	1
CG12863	FBgn0033948	XLOC_005856	2R	FBtr0087500	22.9776	-0.467828	0.501121	-0.933563	0.350529	1
CG12866	FBgn0033955	XLOC_004154	2R	FBtr0339982;FBtr0339981;FBtr0300764;FBtr0300765	1.70787	0.0611937	0.301902	0.202694	0.839375	1
CG12868	FBgn0033945	XLOC_005852	2R	FBtr0301735	2.35973	-0.394684	0.332593	-1.18669	0.235352	1
CG12869	FBgn0033943	XLOC_004135	2R	FBtr0087496;FBtr0339977;FBtr0339978	11.7667	-0.54234	0.515366	-1.05234	0.292644	1
CG1287	FBgn0037506	XLOC_012374	3R	FBtr0081554	6.05284	-0.719333	0.489107	-1.47071	0.14137	1
CG12877	FBgn0039544	XLOC_011860	3R	FBtr0100446	14.9647	0.178498	0.50937	0.350429	0.726017	1
CG1288	FBgn0250845	XLOC_012347	3R	FBtr0081604;FBtr0334889	1.81023	-0.413827	0.338	-1.22434	0.220823	1
CG12880	FBgn0046258	XLOC_011855	3R	FBtr0085217	2.31691	-0.0370925	0.385489	-0.096222	0.923344	1
CG12883	FBgn0039538	XLOC_011854	3R	FBtr0085216	20.1481	0.156449	0.500737	0.312437	0.754709	1
CG12885	FBgn0039523	XLOC_011843	3R	FBtr0321256;FBtr0085185	7.44043	-0.102577	0.43806	-0.234161	0.81486	1
CG12895	FBgn0033523	XLOC_005528	2R	FBtr0330615;FBtr0088314	6.8568	0.264274	0.496854	0.531895	0.594799	1
CG12907	FBgn0250840	XLOC_003798	2R	FBtr0305904;FBtr0088351	6.6183	-0.0278204	0.489784	-0.0568012	0.954704	1
CG12909	FBgn0033507	XLOC_003796	2R	FBtr0088348	4.15858	0.158271	0.434178	0.36453	0.715462	1
CG1291	FBgn0035401	XLOC_007059	3L	FBtr0073023	23.0109	0.245839	0.490971	0.500719	0.616569	1
CG12910;CAP		XLOC_003795	2R	FBtr0310141;FBtr0310142;FBtr0088337;FBtr0088338;FBtr0306688;FBtr0299829;FBtr0299825;FBtr0088347;FBtr0088339;FBtr0088340;FBtr0299830;FBtr0336696;FBtr0336695;FBtr0301131;FBtr0306691;FBtr0299826;FBtr0088341;FBtr0336694;FBtr0306690;FBtr0088343;FBtr0088342;FBtr0301965;FBtr0088344;FBtr0088345;FBtr0088346;FBtr0299828	186.584	-0.0111081	0.334773	-0.0331811	0.97353	0.998087
CG12911	FBgn0033501	XLOC_003794	2R	FBtr0339451;FBtr0339453;FBtr0339454;FBtr0339452;FBtr0289962;FBtr0088336	7.69667	-0.497815	0.476175	-1.04545	0.295817	1
CG12914;CG12913		XLOC_003793	2R	FBtr0339449;FBtr0339448;FBtr0088334;FBtr0088335;FBtr0339450	427.8	0.163306	0.263	0.620936	0.534642	0.93778
CG12917;Or46a		XLOC_003789	2R	FBtr0290287;FBtr0088330;FBtr0088331	35.073	-1.08869	0.454668	-2.39448	0.0166439	1
CG12920	FBgn0033481	XLOC_003781	2R	FBtr0088404	252.932	-0.175137	0.309711	-0.565486	0.571744	0.949003
CG12923	FBgn0033461	XLOC_003763	2R	FBtr0331953	1143.96	-0.271602	0.260742	-1.04165	0.297574	0.837179
CG12926	FBgn0033437	XLOC_005459	2R	FBtr0088502	281.827	-0.351258	0.315298	-1.11405	0.265258	0.813682
CG12929	FBgn0033429	XLOC_005454	2R	FBtr0113060;FBtr0088541	129.315	0.0590776	0.329359	0.179371	0.857646	0.992493
CG12934	FBgn0033541	XLOC_003813	2R	FBtr0088213;FBtr0339462	39.9387	-0.0422572	0.455363	-0.0927989	0.926063	1
CG12935	FBgn0033547	XLOC_003820	2R	FBtr0088221;FBtr0332886	597.87	0.131094	0.31528	0.415804	0.677554	0.969394
CG12942	FBgn0033569	XLOC_003834	2R	FBtr0088236	120.717	0.113571	0.362072	0.31367	0.753771	0.975923
CG12945	FBgn0037755	XLOC_012559	3R	FBtr0334685;FBtr0113214	7.79702	0.138581	0.511763	0.270791	0.786552	1
CG12947	FBgn0037753	XLOC_010569	3R	FBtr0113213	1234.77	0.2452	0.297241	0.824921	0.409416	0.904641
CG12950	FBgn0037736	XLOC_012549	3R	FBtr0331695;FBtr0082170	0.442998	0.163596	0.24015	0.681227	0.495728	1
CG12951	FBgn0037677	XLOC_012504	3R	FBtr0082058	1.1026	0.192537	0.253764	0.758724	0.448017	1
CG12963	FBgn0034031	XLOC_004212	2R	FBtr0331963;FBtr0113083;FBtr0113082;FBtr0087337;FBtr0331965;FBtr0331964;FBtr0306569;FBtr0306573;FBtr0300777;FBtr0306570;FBtr0306571;FBtr0306568;FBtr0306572	97.6274	-0.0686837	0.38006	-0.180718	0.856589	0.992493
CG12964	FBgn0034022	XLOC_005924	2R	FBtr0340002;FBtr0273307	3.02944	0.194909	0.383141	0.508714	0.610953	1
CG12970	FBgn0034047	XLOC_004226	2R	FBtr0308816	21.6768	0.0962574	0.498933	0.192926	0.847017	1
CG12971	FBgn0037078	XLOC_010032	3L	FBtr0306795;FBtr0331796	0.612556	0.176021	0.246291	0.714687	0.474802	1
CG12974	FBgn0037065	XLOC_010023	3L	FBtr0345804;FBtr0332860;FBtr0078411;FBtr0078410	48.2064	0.0938958	0.460639	0.203838	0.83848	1
CG12975	FBgn0037061	XLOC_010018	3L	FBtr0078309	0.442998	0.163596	0.24015	0.681227	0.495728	1
CG12983	FBgn0037040	XLOC_010002	3L	FBtr0333285;FBtr0308681;FBtr0114617;FBtr0114618;FBtr0114616	0.674208	-0.194293	0.245566	-0.791208	0.428823	1
CG12984	FBgn0037042	XLOC_008300	3L	FBtr0078286;FBtr0344990	28.198	-0.229582	0.472109	-0.486289	0.626762	1
CG12985	FBgn0030881	XLOC_015314	X	FBtr0074494	165.03	-0.00835931	0.33955	-0.0246188	0.980359	0.998087
CG1299	FBgn0035501	XLOC_007147	3L	FBtr0332658;FBtr0073215	0.442998	0.163596	0.24015	0.681227	0.495728	1
CG12990	FBgn0030859	XLOC_016563	X	FBtr0074479	458.215	-0.00748102	0.285	-0.0262492	0.979059	0.998087
CG12991;CG12992		XLOC_015299	X	FBtr0074448;FBtr0335251;FBtr0335250;FBtr0335249;FBtr0335248;FBtr0074449;FBtr0335254;FBtr0335253;FBtr0335252;FBtr0300778	21.0767	0.270382	0.491195	0.550457	0.582006	1
CG12994	FBgn0040877	XLOC_016551	X	FBtr0074438	0.674208	-0.194293	0.245566	-0.791208	0.428823	1
CG12995	FBgn0030826	XLOC_016539	X	FBtr0074402	1.01101	-0.032415	0.257769	-0.125752	0.899928	1
CG12998	FBgn0030829	XLOC_015290	X	FBtr0346183	5.02939	-0.685308	0.458164	-1.49577	0.134714	1
CG13000	FBgn0030807	XLOC_016513	X	FBtr0074416	125.939	0.0258108	0.353371	0.0730416	0.941773	0.998087
CG13001	FBgn0030806	XLOC_016512	X	FBtr0074417	7.17201	0.207049	0.499257	0.414715	0.678351	1
CG13002	FBgn0030804	XLOC_015274	X	FBtr0074343	1.55278	-0.043159	0.295159	-0.146223	0.883745	1
CG13003	FBgn0030798	XLOC_016505	X	FBtr0074349;FBtr0331739;FBtr0300431	4.68092	0.256216	0.443776	0.577354	0.563701	1
CG13004	FBgn0030797	XLOC_016503	X	FBtr0074351;FBtr0308682;FBtr0112996;FBtr0304152	12.0148	0.607182	0.514629	1.17984	0.238062	1
CG13005	FBgn0030794	XLOC_015268	X	FBtr0074334	5.19085	0.0122189	0.448205	0.0272619	0.978251	1
CG13008	FBgn0030780	XLOC_015258	X	FBtr0074322	67.877	-0.219728	0.381	-0.576714	0.564133	0.947536
CG13010	FBgn0030770	XLOC_016487	X	FBtr0074373	4.31252	-0.996101	0.449919	-2.21396	0.0268318	1
CG13012	FBgn0030769	XLOC_016486	X	FBtr0335280;FBtr0290216;FBtr0335281;FBtr0335279	10.1761	-0.444412	0.508488	-0.873989	0.382124	1
CG13014	FBgn0030759	XLOC_015245	X	FBtr0074282	7.39318	-0.0874932	0.485526	-0.180203	0.856993	1
CG13016	FBgn0033899	XLOC_004098	2R	FBtr0087519	72.5858	-0.488759	0.383877	-1.27322	0.202941	0.74903
CG13018	FBgn0040751	XLOC_005819	2R	FBtr0087581	9.54169	0.380718	0.515089	0.739132	0.459827	1
CG13021	FBgn0029669	XLOC_014502	X	FBtr0070570;FBtr0070571	1.68522	-0.168889	0.329931	-0.51189	0.608728	1
CG13023	FBgn0036677	XLOC_009693	3L	FBtr0345805;FBtr0075307	16.6245	-0.72006	0.514774	-1.39879	0.161876	1
CG13024	FBgn0036665	XLOC_009690	3L	FBtr0273320;FBtr0305913	56.5201	0.230786	0.45514	0.507064	0.61211	0.958939
CG13025	FBgn0036660	XLOC_009687	3L	FBtr0075346;FBtr0333610	93.7866	-0.644163	0.371121	-1.73572	0.0826133	0.549462
CG13026	FBgn0036656	XLOC_009684	3L	FBtr0345347;FBtr0299542	2.15087	0.122686	0.322387	0.380556	0.703533	1
CG13029	FBgn0036670	XLOC_008028	3L	FBtr0075336;FBtr0332702	1.01131	-0.202933	0.251888	-0.805647	0.420446	1
CG13032	FBgn0036652	XLOC_008011	3L	FBtr0075316	51.4785	-0.142572	0.42473	-0.335678	0.737114	1
CG13033	FBgn0036638	XLOC_009663	3L	FBtr0075400	1.13602	-0.221131	0.261966	-0.844122	0.398601	1
CG1304	FBgn0031141	XLOC_016780	X	FBtr0077271	52.2594	0.155179	0.447202	0.347001	0.728591	1
CG13049	FBgn0036592	XLOC_009636	3L	FBtr0075477	0.92109	-0.201544	0.250875	-0.803366	0.421763	1
CG13051	FBgn0040799	XLOC_009632	3L	FBtr0112771	0.442998	0.163596	0.24015	0.681227	0.495728	1
CG1307	FBgn0026566	XLOC_012303	3R	FBtr0346140;FBtr0301623;FBtr0339933	30.0518	0.412665	0.48044	0.85893	0.390379	1
CG13073	FBgn0036577	XLOC_009625	3L	FBtr0075485	2.65085	-0.0944062	0.38985	-0.24216	0.808656	1
CG13074	FBgn0036567	XLOC_009615	3L	FBtr0075496	270.113	-0.147476	0.29989	-0.491767	0.622884	0.958939
CG13075	FBgn0036563	XLOC_007941	3L	FBtr0301031	10.3063	0.15834	0.499075	0.317267	0.751041	1
CG13077	FBgn0032810	XLOC_001512	2L	FBtr0081257;FBtr0336619	15.5728	0.070503	0.510765	0.138034	0.890213	1
CG13078	FBgn0032809	XLOC_001511	2L	FBtr0081256	10.8177	0.0424705	0.514607	0.0825299	0.934225	1
CG13081	FBgn0032804	XLOC_001507	2L	FBtr0081252;FBtr0343772	12.1092	-0.092188	0.515259	-0.178916	0.858004	1
CG13082	FBgn0032803	XLOC_001506	2L	FBtr0081251	14.1037	-0.512892	0.508928	-1.00779	0.313556	1
CG13083	FBgn0032789	XLOC_001497	2L	FBtr0081242	38.6228	0.49006	0.443217	1.10569	0.268861	1
CG13084	FBgn0032788	XLOC_001496	2L	FBtr0081240	0.442998	0.163596	0.24015	0.681227	0.495728	1
CG13086	FBgn0032770	XLOC_001482	2L	FBtr0336818;FBtr0081197;FBtr0336817	3.15971	-0.15603	0.386078	-0.404142	0.686108	1
CG13088	FBgn0032047	XLOC_000721	2L	FBtr0079681	13.0341	0.252284	0.515364	0.489525	0.62447	1
CG1309	FBgn0035519	XLOC_007155	3L	FBtr0073229	44.6601	-0.553282	0.418913	-1.32075	0.186583	1
CG13090	FBgn0032054	XLOC_000724	2L	FBtr0333414;FBtr0079683;FBtr0333413	29.418	1.54464	0.494642	3.12273	0.00179179	1
CG13091	FBgn0032055	XLOC_000725	2L	FBtr0079684;FBtr0333415	13.5477	1.04589	0.512588	2.04041	0.0413091	1
CG13096	FBgn0032050	XLOC_002433	2L	FBtr0343426;FBtr0079698	27.8304	-0.409559	0.46926	-0.872776	0.382785	1
CG13097	FBgn0032051	XLOC_002434	2L	FBtr0079697	9.49569	0.537334	0.482591	1.11344	0.265522	1
CG13101	FBgn0032084	XLOC_002460	2L	FBtr0079784;FBtr0079783	1.24425	0.269628	0.294186	0.91652	0.359394	1
CG13102	FBgn0032088	XLOC_000758	2L	FBtr0079766;FBtr0309842	43.9819	0.510483	0.424192	1.20342	0.228812	1
CG13108	FBgn0032100	XLOC_000768	2L	FBtr0079773	10.7532	-0.464616	0.514678	-0.902731	0.366669	1
CG1311	FBgn0035523	XLOC_007158	3L	FBtr0333566;FBtr0073232	91.9942	0.366472	0.397575	0.921768	0.35665	0.873384
CG13110	FBgn0032111	XLOC_000778	2L	FBtr0079805	0.92109	-0.201544	0.250875	-0.803366	0.421763	1
CG13114	FBgn0032127	XLOC_000795	2L	FBtr0273329	5.8575	-0.477004	0.45846	-1.04045	0.298132	1
CG13116	FBgn0032139	XLOC_000805	2L	FBtr0335502;FBtr0079863	2.74561	0.130556	0.374773	0.348359	0.72757	1
CG13117	FBgn0032140	XLOC_000806	2L	FBtr0335503	8.39345	-0.150669	0.513741	-0.293278	0.76931	1
CG13123	FBgn0032150	XLOC_002499	2L	FBtr0331286;FBtr0331285;FBtr0079917	2.56379	-0.0864389	0.395903	-0.218334	0.827169	1
CG13124	FBgn0032156	XLOC_002510	2L	FBtr0300871;FBtr0300867;FBtr0300869;FBtr0300870;FBtr0300868;FBtr0300866;FBtr0079903;FBtr0079902;FBtr0290197	76.1606	-0.211284	0.397344	-0.531742	0.594905	0.95673
CG13126	FBgn0032168	XLOC_002519	2L	FBtr0343747;FBtr0079892	6.9523	0.0916561	0.486272	0.188487	0.850495	1
CG13127	FBgn0032176	XLOC_000835	2L	FBtr0079933	2.04467	0.130744	0.321556	0.406598	0.684303	1
CG13131	FBgn0032175	XLOC_002526	2L	FBtr0079971	61.4045	-0.0173148	0.445654	-0.0388527	0.969008	0.998087
CG13135	FBgn0032184	XLOC_002529	2L	FBtr0339512;FBtr0079966	6.0957	-0.287651	0.481203	-0.597774	0.549991	1
CG13138	FBgn0032211	XLOC_002552	2L	FBtr0345746;FBtr0080066	2.45991	0.207728	0.36705	0.56594	0.571435	1
CG1314	FBgn0031134	XLOC_016776	X	FBtr0077286	0.612556	0.176021	0.246291	0.714687	0.474802	1
CG13144	FBgn0032260	XLOC_002579	2L	FBtr0080037	156.351	0.00417886	0.356196	0.0117319	0.99064	0.998087
CG1315	FBgn0026565	XLOC_012302	3R	FBtr0337022;FBtr0081699	61.156	-0.544711	0.403755	-1.34911	0.177301	0.712452
CG13151	FBgn0033750	XLOC_003982	2R	FBtr0087939	84.9083	0.791414	0.438049	1.80668	0.0708122	0.52166
CG13154	FBgn0033736	XLOC_005689	2R	FBtr0087953	179.613	-0.529397	0.315027	-1.68048	0.0928645	0.575925
CG13157	FBgn0033732	XLOC_003971	2R	FBtr0087925	15.4018	-0.110343	0.513349	-0.214948	0.829808	1
CG1316	FBgn0035526	XLOC_007159	3L	FBtr0073233	32.5948	0.303752	0.462154	0.657252	0.511019	1
CG13163	FBgn0033712	XLOC_003943	2R	FBtr0087896;FBtr0339628	116.279	0.234815	0.394445	0.595305	0.55164	0.946214
CG13168	FBgn0033705	XLOC_003936	2R	FBtr0339585;FBtr0087999;FBtr0087998	1.68552	-0.301055	0.298355	-1.00905	0.312952	1
CG1317	FBgn0035333	XLOC_008684	3L	FBtr0345587;FBtr0300773;FBtr0072901	54.5122	0.143158	0.446597	0.320553	0.748549	1
CG13175	FBgn0033693	XLOC_003928	2R	FBtr0100143	17.9407	0.623499	0.502359	1.24114	0.214553	1
CG13177	FBgn0040759	XLOC_003923	2R	FBtr0112772;FBtr0345490	243.573	0.810818	0.379944	2.13405	0.032839	0.380657
CG13183	FBgn0033667	XLOC_005636	2R	FBtr0088054	3.90685	0.0185204	0.403732	0.0458729	0.963412	1
CG13185	FBgn0033661	XLOC_005633	2R	FBtr0310323	1145.93	-0.644702	0.239631	-2.6904	0.00713663	0.17681
CG13188	FBgn0033668	XLOC_003906	2R	FBtr0088040;FBtr0088039	89.7539	0.630361	0.40948	1.53942	0.123702	0.638484
CG1319	FBgn0035529	XLOC_007162	3L	FBtr0300775	10.0536	0.441935	0.515258	0.857696	0.391061	1
CG13192	FBgn0033653	XLOC_003893	2R	FBtr0088031	3.33872	0.340907	0.394034	0.865172	0.386944	1
CG13196	FBgn0033645	XLOC_005622	2R	FBtr0088084	260.449	-0.0439691	0.29866	-0.147221	0.882957	0.992493
CG13198	FBgn0033640	XLOC_003884	2R	FBtr0088072	15.412	-0.199253	0.511987	-0.389176	0.697146	1
CG13202	FBgn0033623	XLOC_005597	2R	FBtr0088157	3391.83	-1.26397	0.336033	-3.76143	0.000168942	0.013667
CG13203	FBgn0033628	XLOC_003872	2R	FBtr0304901;FBtr0304902	0.631692	0.177839	0.247149	0.719562	0.471795	1
CG13204	FBgn0033627	XLOC_003871	2R	FBtr0088128;FBtr0088129	30.264	0.029264	0.499232	0.058618	0.953256	1
CG13215	FBgn0033592	XLOC_005573	2R	FBtr0088192	0.612556	0.176021	0.246291	0.714687	0.474802	1
CG13216	FBgn0033591	XLOC_005572	2R	FBtr0088193	0.612556	0.176021	0.246291	0.714687	0.474802	1
CG13220	FBgn0033608	XLOC_003858	2R	FBtr0332421;FBtr0088116	15.623	-0.405694	0.506178	-0.801484	0.422851	1
CG13228	FBgn0033588	XLOC_003845	2R	FBtr0088106	0.442998	0.163596	0.24015	0.681227	0.495728	1
CG13229	FBgn0033579	XLOC_005565	2R	FBtr0330603;FBtr0330602;FBtr0088206	0.56801	-0.194549	0.245753	-0.791644	0.428568	1
CG13230	FBgn0040764	XLOC_003841	2R	FBtr0088204	2.86578	-0.157143	0.403279	-0.389663	0.696786	1
CG13231	FBgn0033580	XLOC_003840	2R	FBtr0088203	7.55047	-0.106534	0.497804	-0.214008	0.830541	1
CG13239	FBgn0037197	XLOC_008446	3L	FBtr0078548	4.49403	-0.36246	0.437014	-0.829402	0.406877	1
CG13244	FBgn0032577	XLOC_001268	2L	FBtr0080792	0.56801	-0.194549	0.245753	-0.791644	0.428568	1
CG13247	FBgn0036979	XLOC_008248	3L	FBtr0078184	123.093	0.0779669	0.347013	0.22468	0.822228	0.985388
CG13248	FBgn0036984	XLOC_009954	3L	FBtr0078234	6.29584	-0.465939	0.480946	-0.968797	0.332647	1
CG13250	FBgn0037013	XLOC_008273	3L	FBtr0078211;FBtr0331565	272.947	0.340258	0.297052	1.14545	0.252022	0.806231
CG13252	FBgn0037016	XLOC_008280	3L	FBtr0078245	14.5504	0.16155	0.515228	0.31355	0.753863	1
CG13255	FBgn0040636	XLOC_008290	3L	FBtr0331527	166.32	0.253496	0.355397	0.713275	0.475676	0.932543
CG13258	FBgn0032582	XLOC_002953	2L	FBtr0080853;FBtr0305564	1.45431	-0.0955349	0.288305	-0.331367	0.740367	1
CG13272	FBgn0086673	XLOC_001329	2L	FBtr0331621;FBtr0080914	2.65753	0.111709	0.36879	0.302906	0.761961	1
CG13280	FBgn0032609	XLOC_002991	2L	FBtr0331625;FBtr0080931	23.1745	-0.401756	0.506513	-0.793181	0.427672	1
CG13282	FBgn0032612	XLOC_002993	2L	FBtr0080929;FBtr0331624	33.4289	-0.050891	0.447351	-0.113761	0.909428	1
CG13283	FBgn0032613	XLOC_002994	2L	FBtr0080928	4.42712	0.02999	0.438645	0.0683696	0.945491	1
CG13284	FBgn0032614	XLOC_002995	2L	FBtr0345747;FBtr0332334;FBtr0080927;FBtr0332333;FBtr0080926	19.6231	1.06212	0.502444	2.11391	0.034523	1
CG13285	FBgn0035611	XLOC_008884	3L	FBtr0306593;FBtr0077141	4.26312	-0.270556	0.404254	-0.669273	0.503321	1
CG13287	FBgn0035643	XLOC_007240	3L	FBtr0077027	1.95475	0.0191257	0.313596	0.0609883	0.951369	1
CG13288	FBgn0035648	XLOC_007243	3L	FBtr0331563;FBtr0113148	0.56801	-0.194549	0.245753	-0.791644	0.428568	1
CG13293	FBgn0035677	XLOC_007261	3L	FBtr0332064;FBtr0332063;FBtr0332061;FBtr0332062	484.485	-0.263883	0.291615	-0.904901	0.365518	0.880542
CG13295	FBgn0035674	XLOC_008927	3L	FBtr0077065	324.814	0.742613	0.336897	2.20427	0.0275054	0.351281
CG13296	FBgn0035687	XLOC_007272	3L	FBtr0076997	43.0924	-0.3708	0.443379	-0.836305	0.402983	1
CG13298	FBgn0035692	XLOC_008950	3L	FBtr0077015	5.77322	0.348752	0.485034	0.719026	0.472125	1
CG13299	FBgn0035694	XLOC_008952	3L	FBtr0077013	4.6153	0.629298	0.459227	1.37034	0.170581	1
CG13300	FBgn0035699	XLOC_008963	3L	FBtr0077007	0.674208	-0.194293	0.245566	-0.791208	0.428823	1
CG13305	FBgn0035921	XLOC_009123	3L	FBtr0273349;FBtr0273348	0.612556	0.176021	0.246291	0.714687	0.474802	1
CG13308	FBgn0035932	XLOC_007441	3L	FBtr0303232	33.4481	0.122902	0.49356	0.249012	0.803352	1
CG13309	FBgn0035933	XLOC_007442	3L	FBtr0076582	52.2207	0.338462	0.414703	0.816154	0.414412	1
CG13310	FBgn0035928	XLOC_009132	3L	FBtr0076590	20.8931	-0.345486	0.514534	-0.671453	0.501932	1
CG13311	FBgn0035929	XLOC_009133	3L	FBtr0076589	3.41176	0.163382	0.399736	0.408725	0.682742	1
CG13312	FBgn0035931	XLOC_009135	3L	FBtr0076587	0.674208	-0.194293	0.245566	-0.791208	0.428823	1
CG13313	FBgn0035941	XLOC_007451	3L	FBtr0076512	36.8431	-0.0870513	0.450257	-0.193337	0.846695	1
CG13314	FBgn0035949	XLOC_007455	3L	FBtr0303233;FBtr0076518	187.466	0.357651	0.340652	1.0499	0.293763	0.833109
CG13315	FBgn0040827	XLOC_007464	3L	FBtr0340709;FBtr0076530	313.339	0.214099	0.288783	0.741381	0.458462	0.932543
CG13318	FBgn0037627	XLOC_012475	3R	FBtr0081942	0.56801	-0.194549	0.245753	-0.791644	0.428568	1
CG13319;sug		XLOC_004019	2R	FBtr0300890;FBtr0087788;FBtr0331985;FBtr0087789	270.146	0.155543	0.330211	0.471041	0.637612	0.962354
CG13321	FBgn0033787	XLOC_004021	2R	FBtr0345371;FBtr0087792	156.632	-0.812903	0.376299	-2.16026	0.0307528	0.372098
CG13322	FBgn0033784	XLOC_005730	2R	FBtr0087805;FBtr0087804;FBtr0087803	22.1344	0.137858	0.490725	0.280926	0.778767	1
CG13323	FBgn0033788	XLOC_005735	2R	FBtr0345360	62.5757	-0.490977	0.406103	-1.209	0.226664	0.780575
CG13324	FBgn0033789	XLOC_005736	2R	FBtr0087796	7.22095	-0.490125	0.508583	-0.963706	0.335193	1
CG13325	FBgn0033792	XLOC_004026	2R	FBtr0339748;FBtr0087722;FBtr0345194;FBtr0345931	20.3644	-0.374885	0.509257	-0.73614	0.461645	1
CG13326	FBgn0033794	XLOC_005739	2R	FBtr0087779	40.2166	0.00531257	0.428091	0.0124099		1
CG13330	FBgn0033848	XLOC_004062	2R	FBtr0087671	9.59015	0.206336	0.514826	0.400787	0.688577	1
CG13331	FBgn0033850	XLOC_004063	2R	FBtr0087673	5.45875	-0.173815	0.44269	-0.392635	0.694589	1
CG13332	FBgn0033851	XLOC_004064	2R	FBtr0087674	5.35828	0.174037	0.483706	0.3598	0.718997	1
CG13334	FBgn0033856	XLOC_004067	2R	FBtr0305955	2.18415	0.184704	0.358075	0.515823	0.605978	1
CG13337;CG18368		XLOC_004073	2R	FBtr0344330;FBtr0087626;FBtr0087627	1.05555	0.229201	0.274766	0.834167	0.404187	1
CG13339	FBgn0033871	XLOC_004080	2R	FBtr0087632	6.73568	-0.155344	0.459363	-0.338173	0.735233	1
CG13344	FBgn0033884	XLOC_004088	2R	FBtr0339953;FBtr0087586	19.5003	1.03419	0.510416	2.02616	0.0427479	1
CG13359;CG13358		XLOC_015588	X	FBtr0070145;FBtr0290198	3.80162	0.855331	0.443637	1.928	0.0538554	1
CG13360	FBgn0025620	XLOC_015585	X	FBtr0070147	52.697	-1.08872	0.411158	-2.64794	0.00809832	1
CG13361	FBgn0029532	XLOC_015581	X	FBtr0070149	16.0254	0.0235893	0.504942	0.0467169	0.962739	1
CG13362	FBgn0029531	XLOC_015580	X	FBtr0070150	70.1471	-0.069381	0.384118	-0.180624	0.856663	0.992493
CG13364	FBgn0026879	XLOC_015576	X	FBtr0070159	186.23	-0.0311246	0.323268	-0.096281	0.923297	0.994348
CG13365	FBgn0029529	XLOC_015575	X	FBtr0070160	7.62645	-0.393297	0.494219	-0.795796	0.426151	1
CG13366	FBgn0025633	XLOC_015574	X	FBtr0339434;FBtr0339433;FBtr0339430;FBtr0110791;FBtr0339432;FBtr0339431;FBtr0070161	169.699	-0.263381	0.31556	-0.834648	0.403916	0.90042
CG13367	FBgn0025634	XLOC_014347	X	FBtr0070121	12.81	0.481467	0.514894	0.935081	0.349747	1
CG13369	FBgn0025640	XLOC_014341	X	FBtr0070115	273.832	0.193522	0.294505	0.657109	0.511111	0.93778
CG13373	FBgn0029522	XLOC_014329	X	FBtr0112947;FBtr0070076	89.7064	-0.340718	0.363654	-0.936929	0.348795	0.869575
CG13375	FBgn0040370	XLOC_015559	X	FBtr0300326;FBtr0342963;FBtr0070103	76.7866	0.302686	0.461159	0.65636		1
CG13376	FBgn0029518	XLOC_015556	X	FBtr0332989;FBtr0332988;FBtr0308207	1.28676	-0.00592986	0.277179	-0.0213936	0.982932	1
CG13377	FBgn0261446	XLOC_015555	X	FBtr0070106;FBtr0332990	230.166	0.110029	0.286432	0.384136	0.700878	0.972543
CG13384	FBgn0032036	XLOC_000704	2L	FBtr0079655;FBtr0079658;FBtr0303468;FBtr0303470;FBtr0303469;FBtr0303467;FBtr0079656;FBtr0079654;FBtr0079653;FBtr0303471;FBtr0079657	24.373	-0.05521	0.477427	-0.115641	0.907937	1
CG13386	FBgn0032040	XLOC_000708	2L	FBtr0079661	7.15187	-0.0614441	0.504911	-0.121693	0.903142	1
CG1339	FBgn0033202	XLOC_005291	2R	FBtr0347154	17.3985	-0.205073	0.511178	-0.401177	0.68829	1
CG13390	FBgn0032031	XLOC_002412	2L	FBtr0079723	13.3759	0.254274	0.510195	0.498386	0.618212	1
CG13392	FBgn0032033	XLOC_002414	2L	FBtr0331995;FBtr0079720	1.18057	0.000422417	0.272088	0.0015525	0.998761	1
CG13397	FBgn0014417	XLOC_002424	2L	FBtr0331991;FBtr0079711	123.469	-0.234439	0.368736	-0.635791	0.524912	0.93778
CG13398	FBgn0032042	XLOC_002425	2L	FBtr0331990;FBtr0079710	19.5351	0.145791	0.498917	0.292216	0.770122	1
CG1340	FBgn0039797	XLOC_012054	3R	FBtr0085699;FBtr0339513	3.10098	0.435203	0.35305	1.2327		1
CG13404	FBgn0030559	XLOC_016330	X	FBtr0299543	10.3755	0.916887	0.512176	1.79018	0.073425	1
CG13405	FBgn0035097	XLOC_008502	3L	FBtr0305595;FBtr0072541	3.41393	0.189354	0.429127	0.441255	0.659029	1
CG13407	FBgn0038931	XLOC_011410	3R	FBtr0084181	2.14921	-0.368123	0.323663	-1.13736	0.255386	1
CG13408	FBgn0038929	XLOC_011408	3R	FBtr0084179	3.83503	0.211148	0.406315	0.519665	0.603297	1
CG13409	FBgn0038926	XLOC_013387	3R	FBtr0084184	94.5557	-0.494033	0.351343	-1.40613	0.159686	0.695766
CG13426	FBgn0034510	XLOC_006391	2R	FBtr0086295	4.9303	-0.466427	0.447781	-1.04164	0.297578	1
CG13428	FBgn0034515	XLOC_006394	2R	FBtr0308649;FBtr0086267	0.612556	0.176021	0.246291	0.714687	0.474802	1
CG13430;CG18065		XLOC_006399	2R	FBtr0100496;FBtr0100495	1.68522	-0.168889	0.329931	-0.51189	0.608728	1
CG13436	FBgn0034532	XLOC_004695	2R	FBtr0086229	76.7564	0.294731	0.408781	0.720999	0.47091	0.932543
CG13437	FBgn0034541	XLOC_004701	2R	FBtr0086235	177.877	-0.182851	0.359001	-0.509332	0.61052	0.958939
CG1344	FBgn0027507	XLOC_003428	2R	FBtr0086034;FBtr0331967	187.265	0.0913968	0.295547	0.309246	0.757134	0.976661
CG13442	FBgn0034546	XLOC_006422	2R	FBtr0086240	0.612556	0.176021	0.246291	0.714687	0.474802	1
CG13445	FBgn0036532	XLOC_007916	3L	FBtr0075503	7.91702	0.213987	0.498245	0.429482	0.667573	1
CG13449	FBgn0036520	XLOC_009580	3L	FBtr0332094;FBtr0075590	3.642	0.342135	0.431258	0.793341	0.427579	1
CG13454	FBgn0036503	XLOC_009566	3L	FBtr0075603	2.84592	0.347297	0.416985	0.832875	0.404915	1
CG13457	FBgn0036482	XLOC_009553	3L	FBtr0075654;FBtr0075653	14.1307	0.300463	0.511938	0.586912	0.557263	1
CG13458	FBgn0036479	XLOC_007864	3L	FBtr0075637	0.612556	0.176021	0.246291	0.714687	0.474802	1
CG13463	FBgn0036470	XLOC_007861	3L	FBtr0075631	2.13626	0.420182	0.350355	1.1993	0.23041	1
CG13471	FBgn0036443	XLOC_009521	3L	FBtr0075709	203.29	0.159056	0.296441	0.536553	0.591576	0.955773
CG13473	FBgn0036442	XLOC_007844	3L	FBtr0075689	1.11721	-0.0395778	0.264294	-0.149749	0.880963	1
CG13474	FBgn0036439	XLOC_009519	3L	FBtr0075711	4.44894	-0.0262697	0.406212	-0.0646699	0.948437	1
CG13476	FBgn0036441	XLOC_007843	3L	FBtr0075687	2.88492	-0.151423	0.405884	-0.373071	0.709096	1
CG13477	FBgn0036438	XLOC_007842	3L	FBtr0075685	1.24222	-0.296758	0.295801	-1.00323	0.315748	1
CG13481	FBgn0036421	XLOC_009504	3L	FBtr0333022;FBtr0113170	3.26065	0.0230098	0.409746	0.0561563	0.955217	1
CG13482	FBgn0036419	XLOC_007827	3L	FBtr0075744	37.0206	0.728276	0.474115	1.53608	0.12452	1
CG13484	FBgn0036406	XLOC_009492	3L	FBtr0075780	29.6873	0.131719	0.467995	0.281454	0.778363	1
CG13488	FBgn0034670	XLOC_004807	2R	FBtr0342977;FBtr0308748;FBtr0071723	0.674208	-0.194293	0.245566	-0.791208	0.428823	1
CG13492	FBgn0034662	XLOC_006522	2R	FBtr0302446	529.667	0.302954	0.305362	0.992115	0.321142	0.847072
CG13494	FBgn0034671	XLOC_006533	2R	FBtr0071733	0.674208	-0.194293	0.245566	-0.791208	0.428823	1
CG13501	FBgn0034684	XLOC_006540	2R	FBtr0071804;FBtr0345871	189.985	0.447843	0.33508	1.33653	0.181377	0.712452
CG13502	FBgn0034692	XLOC_006543	2R	FBtr0071799;FBtr0308241	6.18292	0.0661985	0.460494	0.143755	0.885694	1
CG13506	FBgn0034723	XLOC_004841	2R	FBtr0342989;FBtr0071822	65.8358	0.486949	0.424541	1.147	0.251381	0.806231
CG13510;CG13511;CG42565		XLOC_004867	2R	FBtr0071862;FBtr0309799;FBtr0309800;FBtr0071863;FBtr0301269	505.351	-0.459342	0.358151	-1.28254	0.199655	0.746071
CG13516;RYBP		XLOC_004873	2R	FBtr0343011;FBtr0100554;FBtr0345500;FBtr0071868	23.8342	0.695306	0.496482	1.40047	0.161374	1
CG13531	FBgn0034786	XLOC_006607	2R	FBtr0071910;FBtr0343182	9.41886	-0.298761	0.515198	-0.579895	0.561985	1
CG13532	FBgn0034788	XLOC_004896	2R	FBtr0071899	1.60167	0.067793	0.299359	0.226461	0.820843	1
CG13539	FBgn0034833	XLOC_004919	2R	FBtr0343195;FBtr0071998	5.03007	0.435232	0.462984	0.940059	0.347187	1
CG1354	FBgn0030151	XLOC_014843	X	FBtr0089384;FBtr0089383;FBtr0089385;FBtr0336922;FBtr0089386	13.5758	0.736037	0.515346	1.42824	0.153223	1
CG13545	FBgn0034828	XLOC_006643	2R	FBtr0306080	1.13602	-0.221131	0.261966	-0.844122	0.398601	1
CG13551	FBgn0040660	XLOC_006663	2R	FBtr0072034;FBtr0072033	91.3784	-0.0665111	0.388724	-0.171101	0.864145	0.992493
CG13559	FBgn0034870	XLOC_004939	2R	FBtr0072057	1.13602	-0.221131	0.261966	-0.844122	0.398601	1
CG13560	FBgn0034899	XLOC_004960	2R	FBtr0345534	0.442998	0.163596	0.24015	0.681227	0.495728	1
CG13561	FBgn0034906	XLOC_006702	2R	FBtr0343271	0.442998	0.163596	0.24015	0.681227	0.495728	1
CG13562	FBgn0034928	XLOC_004980	2R	FBtr0305988;FBtr0072135	969.501	1.12045	0.365488	3.06563	0.00217214	0.0844151
CG13563	FBgn0034966	XLOC_005006	2R	FBtr0113117	2.27791	0.564012	0.391133	1.44199	0.149304	1
CG13564	FBgn0034973	XLOC_005012	2R	FBtr0072246	1.24425	0.269628	0.294186	0.91652	0.359394	1
CG13565	FBgn0034935	XLOC_006726	2R	FBtr0072209;FBtr0345932;FBtr0331981	13.7862	0.382785	0.514433	0.744091	0.456821	1
CG13566	FBgn0034942	XLOC_006729	2R	FBtr0306797	1.74115	0.0933236	0.308773	0.30224	0.762469	1
CG13575	FBgn0034996	XLOC_005030	2R	FBtr0072264	1.24425	0.269628	0.294186	0.91652	0.359394	1
CG1358	FBgn0033196	XLOC_005286	2R	FBtr0303287;FBtr0088950;FBtr0088949;FBtr0088948	10.6161	0.31463	0.511933	0.614592	0.538824	1
CG13581	FBgn0035014	XLOC_005050	2R	FBtr0072300	21.3094	-0.342928	0.508059	-0.674976	0.499691	1
CG13585	FBgn0035020	XLOC_005056	2R	FBtr0072303;FBtr0300488;FBtr0072304;FBtr0300489	44.1054	-0.044693	0.43615	-0.102472	0.918382	1
CG13587	FBgn0035031	XLOC_005064	2R	FBtr0072314	946.93	0.100335	0.311559	0.322043	0.74742	0.974841
CG13594	FBgn0035041	XLOC_006789	2R	FBtr0343492;FBtr0072336	11.1533	-0.359493	0.5153	-0.697637	0.485404	1
CG13599	FBgn0039128	XLOC_011532	3R	FBtr0084493	3.7524	0.869292	0.445811	1.94991	0.0511866	1
CG1360	FBgn0033195	XLOC_005285	2R	FBtr0088951	4.75176	0.178556	0.467717	0.38176	0.702639	1
CG13601	FBgn0039126	XLOC_013530	3R	FBtr0330369	22.2169	0.174613	0.486442	0.358959	0.719626	1
CG13603	FBgn0039135	XLOC_013537	3R	FBtr0084510	6.79193	0.154621	0.492728	0.313807	0.753668	1
CG13604	FBgn0039137	XLOC_013538	3R	FBtr0113276;FBtr0113275;FBtr0330370;FBtr0113277	107.583	0.43595	0.398314	1.09449	0.273741	0.817144
CG13605	FBgn0039150	XLOC_013545	3R	FBtr0300705	34.0599	0.041906	0.463998	0.0903151	0.928037	1
CG13606	FBgn0039161	XLOC_011558	3R	FBtr0335412;FBtr0084553;FBtr0344266;FBtr0110794	0.631692	0.177839	0.247149	0.719562	0.471795	1
CG13607	FBgn0039151	XLOC_013546	3R	FBtr0084585;FBtr0304157	14.5152	0.34205	0.513179	0.666531	0.505072	1
CG13609	FBgn0039170	XLOC_011562	3R	FBtr0084560	15.5766	0.314968	0.509871	0.61774	0.536747	1
CG13611	FBgn0039177	XLOC_011569	3R	FBtr0084600	12.6674	0.856333	0.514158	1.66551	0.0958117	1
CG13614	FBgn0039194	XLOC_011581	3R	FBtr0084614	0.442998	0.163596	0.24015	0.681227	0.495728	1
CG13617	FBgn0039201	XLOC_011589	3R	FBtr0084641;FBtr0334333	5.60019	0.109538	0.42619	0.257016	0.797166	1
CG13618	FBgn0039203	XLOC_011591	3R	FBtr0084643	5.23529	0.504925	0.481383	1.0489	0.294222	1
CG13622	FBgn0039202	XLOC_013584	3R	FBtr0289971	19.3371	0.438191	0.503192	0.870822	0.383851	1
CG13623	FBgn0039205	XLOC_013585	3R	FBtr0334337;FBtr0084679	22.7096	0.756447	0.51507	1.46863	0.141933	1
CG13624	FBgn0039209	XLOC_013587	3R	FBtr0084672;FBtr0110796;FBtr0084674;FBtr0110795;FBtr0084673;FBtr0345204;FBtr0084675	60.7305	0.27762	0.442476	0.627424	0.530382	0.93778
CG13625	FBgn0039210	XLOC_013588	3R	FBtr0084671	10.78	0.643253	0.515364	1.24815	0.211975	1
CG13630	FBgn0039219	XLOC_013595	3R	FBtr0084745	246.645	0.261055	0.32421	0.805204	0.420702	0.913587
CG13631	FBgn0040600	XLOC_011614	3R	FBtr0339253	15.7089	0.444612	0.514991	0.86334	0.387951	1
CG13634	FBgn0039224	XLOC_013599	3R	FBtr0084742	0.631692	0.177839	0.247149	0.719562	0.471795	1
CG13641	FBgn0039239	XLOC_013613	3R	FBtr0084729	3.75958	0.293296	0.403209	0.727403	0.466979	1
CG13643	FBgn0040601	XLOC_013617	3R	FBtr0334572;FBtr0334573;FBtr0310462;FBtr0306798	0.442998	0.163596	0.24015	0.681227	0.495728	1
CG13650	FBgn0039277	XLOC_013633	3R	FBtr0113286	1.18057	0.000422417	0.272088	0.0015525	0.998761	1
CG13654	FBgn0039290	XLOC_011663	3R	FBtr0084805;FBtr0339257;FBtr0339256	24.6929	0.342023	0.477367	0.716477	0.473697	1
CG13658	FBgn0039315	XLOC_011683	3R	FBtr0273361	35.5386	0.459276	0.469776	0.977649	0.328248	1
CG13659	FBgn0039319	XLOC_011685	3R	FBtr0084828	29.0058	0.533647	0.49333	1.08172	0.279375	1
CG13663	FBgn0039291	XLOC_013638	3R	FBtr0084873	16.7249	0.659537	0.514417	1.28211	0.199805	1
CG13667	FBgn0035890	XLOC_007406	3L	FBtr0076611;FBtr0076610	7.41365	0.192875	0.506164	0.381052	0.703165	1
CG13670	FBgn0035873	XLOC_007395	3L	FBtr0076708	0.442998	0.163596	0.24015	0.681227	0.495728	1
CG13671	FBgn0035867	XLOC_007393	3L	FBtr0076706	21.1283	-0.621384	0.495099	-1.25507	0.209454	1
CG13674	FBgn0035858	XLOC_009093	3L	FBtr0076719;FBtr0333624	0.442998	0.163596	0.24015	0.681227	0.495728	1
CG13675	FBgn0035845	XLOC_009084	3L	FBtr0300119;FBtr0330087	1.7489	0.0868664	0.332352	0.261368	0.793808	1
CG13676	FBgn0035844	XLOC_009081	3L	FBtr0332761;FBtr0076732	36.8278	-0.108871	0.439012	-0.24799	0.804142	1
CG13685	FBgn0035816	XLOC_007357	3L	FBtr0334644	2.14921	-0.368123	0.323663	-1.13736	0.255386	1
CG13689	FBgn0031270	XLOC_000103	2L	FBtr0078071;FBtr0310023	1.57932	-0.367489	0.322567	-1.13927	0.254592	1
CG13690	FBgn0031252	XLOC_001796	2L	FBtr0078090	42.4187	0.290209	0.482054	0.602027	0.547156	1
CG13692	FBgn0031254	XLOC_000088	2L	FBtr0078057	0.442998	0.163596	0.24015	0.681227	0.495728	1
CG13693	FBgn0031235	XLOC_000070	2L	FBtr0078126	910.649	-0.365035	0.254624	-1.43362	0.151679	0.69517
CG13694	FBgn0031219	XLOC_001767	2L	FBtr0078160	14.5471	0.533075	0.515308	1.03448	0.300912	1
CG13698	FBgn0036773	XLOC_009782	3L	FBtr0075137;FBtr0333698	3.46373	0.136898	0.365679	0.374367	0.708131	1
CG13704	FBgn0035583	XLOC_007200	3L	FBtr0073353	3.478	-0.0543762	0.412025	-0.131973	0.895006	1
CG13705	FBgn0035582	XLOC_007199	3L	FBtr0073352	2.76021	-0.0884873	0.370948	-0.238544	0.81146	1
CG13707	FBgn0035578	XLOC_008853	3L	FBtr0308822;FBtr0308821;FBtr0306799	5.31849	0.192613	0.432366	0.445485	0.65597	1
CG13708	FBgn0035577	XLOC_008852	3L	FBtr0332744;FBtr0073358	70.5767	-0.0861105	0.386869	-0.222583	0.82386	0.985388
CG1371	FBgn0033482	XLOC_005498	2R	FBtr0088428	24.5137	-0.313723	0.478849	-0.655161	0.512364	1
CG13712	FBgn0035570	XLOC_008846	3L	FBtr0073364	5.65639	0.571697	0.487437	1.17286	0.240851	1
CG13716	FBgn0035563	XLOC_008841	3L	FBtr0073319	0.612556	0.176021	0.246291	0.714687	0.474802	1
CG13733	FBgn0036729	XLOC_009728	3L	FBtr0075225	12.8283	-0.330389	0.514718	-0.641883	0.520949	1
CG13737	FBgn0036382	XLOC_007804	3L	FBtr0075754;FBtr0075755	2.81047	0.252818	0.377639	0.66947	0.503196	1
CG13738	FBgn0036390	XLOC_009484	3L	FBtr0075790	32.8114	-0.403847	0.459775	-0.878358	0.37975	1
CG13739;CG13954;CR45918		XLOC_005439	2R	FBtr0088558;FBtr0332997;FBtr0332996;FBtr0346992	30.6838	0.429632	0.513162	0.837224		1
CG13742	FBgn0033372	XLOC_005418	2R	FBtr0339285;FBtr0310148;FBtr0310147;FBtr0300369	37.4616	-0.921183	0.484858	-1.8999	0.0574459	1
CG13743;CG8197		XLOC_005416	2R	FBtr0308823;FBtr0088662;FBtr0339287;FBtr0339286;FBtr0088661	1.57902	-0.130557	0.299694	-0.435636	0.663101	1
CG13747	FBgn0033364	XLOC_003679	2R	FBtr0088660	3.71033	0.254844	0.399162	0.638448	0.523182	1
CG13749	FBgn0033353	XLOC_003673	2R	FBtr0300706	4.91263	-0.0944542	0.435659	-0.216808	0.828358	1
CG13751	FBgn0033340	XLOC_003666	2R	FBtr0088644	22.0743	0.125185	0.499705	0.250518	0.802187	1
CG13759	FBgn0040376	XLOC_014463	X	FBtr0302447;FBtr0302449;FBtr0302448;FBtr0070437	34.227	0.480128	0.474009	1.01291	0.311104	1
CG13760	FBgn0040375	XLOC_015695	X	FBtr0308567;FBtr0300707	6.02826	-0.234854	0.454419	-0.516823	0.60528	1
CG13766	FBgn0031834	XLOC_002261	2L	FBtr0343161;FBtr0079330	350.387	0.0910791	0.30271	0.300879	0.763507	0.977649
CG13771	FBgn0031844	XLOC_002268	2L	FBtr0333517;FBtr0079323	1.57902	-0.130557	0.299694	-0.435636	0.663101	1
CG13773	FBgn0042092	XLOC_002290	2L	FBtr0079372	3.07833	0.253297	0.357507	0.708509	0.478629	1
CG13775	FBgn0031874	XLOC_002300	2L	FBtr0343775;FBtr0343776;FBtr0079363	32.3191	-0.117697	0.453469	-0.259548	0.795213	1
CG13784	FBgn0031897	XLOC_002319	2L	FBtr0330197;FBtr0330199;FBtr0330198;FBtr0110799;FBtr0079414	105.965	0.0148977	0.360392	0.0413376	0.967027	0.998087
CG13786	FBgn0031900	XLOC_002323	2L	FBtr0333353	1.61614	0.333904	0.320706	1.04115	0.297805	1
CG13793	FBgn0031935	XLOC_002344	2L	FBtr0302518	1.5456	0.318126	0.314606	1.01119	0.311926	1
CG13794	FBgn0031936	XLOC_002345	2L	FBtr0079507	1.24425	0.269628	0.294186	0.91652	0.359394	1
CG13795	FBgn0031937	XLOC_002346	2L	FBtr0343407;FBtr0300709	25.4044	0.167934	0.499915	0.335924	0.736928	1
CG13796	FBgn0031939	XLOC_002347	2L	FBtr0079505;FBtr0114496;FBtr0079504;FBtr0079503	2.35371	0.214915	0.367534	0.584748	0.558717	1
CG13806	FBgn0035325	XLOC_007007	3L	FBtr0072879	2.26063	-0.229586	0.333816	-0.687762	0.491603	1
CG13807	FBgn0035323	XLOC_007006	3L	FBtr0072878	34.7725	-0.225765	0.461066	-0.489659	0.624375	1
CG13810	FBgn0035313	XLOC_006999	3L	FBtr0308229	23.7895	-0.256904	0.488893	-0.525481	0.599249	1
CG13813	FBgn0036956	XLOC_008233	3L	FBtr0074827	59.5101	-0.122979	0.419135	-0.293411	0.769208	0.978361
CG13827	FBgn0039068	XLOC_011494	3R	FBtr0084376;FBtr0307596	7.26915	0.0631667	0.463899	0.136165	0.891691	1
CG13829	FBgn0039059	XLOC_013470	3R	FBtr0084400	9.42643	-0.525779	0.513701	-1.02351	0.306066	1
CG13830	FBgn0039054	XLOC_013463	3R	FBtr0302023;FBtr0337028;FBtr0302022	4.7709	0.145755	0.439293	0.331795	0.740044	1
CG13837	FBgn0039042	XLOC_011483	3R	FBtr0084345	34.8072	-0.163738	0.459259	-0.356527	0.721446	1
CG13838	FBgn0039041	XLOC_011482	3R	FBtr0084344	9.24579	-0.182619	0.5139	-0.35536	0.72232	1
CG13840	FBgn0039028	XLOC_013449	3R	FBtr0339139	0.442998	0.163596	0.24015	0.681227	0.495728	1
CG13841	FBgn0040588	XLOC_013442	3R	FBtr0084316;FBtr0346733	135.07	-0.560291	0.356849	-1.57011	0.11639	0.62228
CG13842	FBgn0039009	XLOC_013429	3R	FBtr0345302	21.0086	0.780532	0.510845	1.52792	0.126532	1
CG13843	FBgn0038993	XLOC_011454	3R	FBtr0084269	17.2078	-0.270219	0.513042	-0.5267	0.598402	1
CG13847	FBgn0038967	XLOC_013407	3R	FBtr0337045;FBtr0301711	1.1026	0.192537	0.253764	0.758724	0.448017	1
CG13850	FBgn0038961	XLOC_013404	3R	FBtr0337046;FBtr0084231	13.0785	0.315722	0.515362	0.612622	0.540127	1
CG13855	FBgn0038960	XLOC_011435	3R	FBtr0084225	101.579	-0.369679	0.384049	-0.962583	0.335757	0.861449
CG13856	FBgn0038959	XLOC_011434	3R	FBtr0084224	9.16148	-0.170679	0.512579	-0.332981	0.739149	1
CG13857	FBgn0038958	XLOC_013401	3R	FBtr0084234	117.663	0.617744	0.374185	1.6509	0.0987582	0.584121
CG13865	FBgn0039965	XLOC_015530	X	FBtr0111191;FBtr0111192;FBtr0344110	17.5142	-0.129569	0.511601	-0.253261	0.800067	1
CG13868	FBgn0034501	XLOC_006386	2R	FBtr0301209;FBtr0086298	231.236	1.05514	0.331028	3.18746	0.00143528	0.0605262
CG13869	FBgn0034486	XLOC_006372	2R	FBtr0086323	13.9501	0.327457	0.506388	0.646653	0.517856	1
CG1387	FBgn0030033	XLOC_014766	X	FBtr0071173	9.09912	-0.0792721	0.294256	-0.269399		1
CG13870	FBgn0034506	XLOC_004672	2R	FBtr0086288;FBtr0086287	3.37073	-0.428024	0.396876	-1.07848	0.280818	1
CG13871	FBgn0034502	XLOC_004668	2R	FBtr0086282	2.82342	-0.562075	0.378199	-1.48619	0.137229	1
CG13872	FBgn0034477	XLOC_006360	2R	FBtr0086341	9.41836	-0.851627	0.482421	-1.76532	0.0775105	1
CG13875	FBgn0035104	XLOC_006849	3L	FBtr0334068;FBtr0072476	64.0014	-0.0317761	0.399869	-0.0794663	0.936662	0.998087
CG13876	FBgn0035109	XLOC_006853	3L	FBtr0072484	161.832	0.0133573	0.328576	0.0406521	0.967573	0.998087
CG13877	FBgn0035112	XLOC_006856	3L	FBtr0300710;FBtr0304058	31.0283	0.279712	0.470809	0.59411	0.552439	1
CG13884	FBgn0035138	XLOC_008534	3L	FBtr0072568	46.6371	-0.300782	0.429831	-0.699767	0.484073	1
CG13887	FBgn0035165	XLOC_006894	3L	FBtr0304797;FBtr0072584;FBtr0072583;FBtr0345588	89.2092	-0.275468	0.417398	-0.659965	0.509276	0.936785
CG13889	FBgn0035168	XLOC_006896	3L	FBtr0332752;FBtr0072586	0.442998	0.163596	0.24015	0.681227	0.495728	1
CG13890	FBgn0035169	XLOC_006897	3L	FBtr0072587	8.40272	0.150174	0.475881	0.315571	0.752328	1
CG13891	FBgn0035139	XLOC_008536	3L	FBtr0072566	1.28676	-0.00592986	0.277179	-0.0213936	0.982932	1
CG13893	FBgn0035146	XLOC_008541	3L	FBtr0072562	283.909	-0.1219	0.297054	-0.410363	0.68154	0.969394
CG13894	FBgn0035157	XLOC_008555	3L	FBtr0072606	1.53365	-0.048577	0.293181	-0.165689	0.868402	1
CG13895	FBgn0035158	XLOC_008556	3L	FBtr0331771;FBtr0072605	32.1576	0.0909299	0.506225	0.179624	0.857448	1
CG13896	FBgn0035159	XLOC_008558	3L	FBtr0072602;FBtr0331770;FBtr0290220	136.771	0.0153197	0.38327	0.039971	0.968116	0.998087
CG13898	FBgn0035161	XLOC_008563	3L	FBtr0072599	16.9675	0.255561	0.502593	0.508486	0.611113	1
CG13901	FBgn0035164	XLOC_008573	3L	FBtr0072596;FBtr0331403	42.9525	0.626273	0.430219	1.45571	0.145474	1
CG13902	FBgn0035166	XLOC_008574	3L	FBtr0331402;FBtr0300712	110.162	-0.0589882	0.363287	-0.162373	0.871012	0.992493
CG13905	FBgn0035176	XLOC_006904	3L	FBtr0289973	4.95517	0.496104	0.454346	1.09191	0.274873	1
CG13907	FBgn0035173	XLOC_008576	3L	FBtr0072593	671.703	-0.581098	0.268783	-2.16196	0.0306212	0.372098
CG13912	FBgn0035186	XLOC_006912	3L	FBtr0072625	15.1111	0.193292	0.51512	0.375236	0.707485	1
CG13917	FBgn0035237	XLOC_006961	3L	FBtr0303993;FBtr0333359;FBtr0072747;FBtr0347066	117.156	-0.00619816	0.333202	-0.0186018	0.985159	0.998087
CG13919	FBgn0035248	XLOC_006966	3L	FBtr0072759	27.2637	0.0901467	0.475306	0.18966	0.849575	1
CG13920	FBgn0025712	XLOC_006968	3L	FBtr0346593;FBtr0072761	236.908	0.279522	0.319437	0.875046	0.381549	0.891957
CG13921	FBgn0035267	XLOC_006975	3L	FBtr0334072;FBtr0303105;FBtr0072773;FBtr0310623;FBtr0303104	9.19264	-0.073967	0.478196	-0.154679	0.877074	1
CG13924	FBgn0035286	XLOC_006988	3L	FBtr0303153;FBtr0300120	35.615	-0.882136	0.44241	-1.99393	0.0461594	1
CG13928	FBgn0035246	XLOC_008619	3L	FBtr0072822	7.63668	0.0310979	0.511199	0.0608334	0.951492	1
CG13930	FBgn0035256	XLOC_008632	3L	FBtr0072803	0.612556	0.176021	0.246291	0.714687	0.474802	1
CG13933	FBgn0035270	XLOC_008639	3L	FBtr0332881;FBtr0072792	8.60588	0.367142	0.498859	0.735965	0.461752	1
CG13937	FBgn0035287	XLOC_008651	3L	FBtr0300717;FBtr0300715;FBtr0332670;FBtr0332669;FBtr0300716;FBtr0300714	1.03366	0.190544	0.252882	0.753492	0.451154	1
CG1394	FBgn0030277	XLOC_016163	X	FBtr0346269;FBtr0073467	19.8222	-0.601113	0.511247	-1.17578	0.239684	1
CG13946	FBgn0040725	XLOC_000114	2L	FBtr0078004	1.5456	0.318126	0.314606	1.01119	0.311926	1
CG13947	FBgn0031277	XLOC_000115	2L	FBtr0078005	8.08214	0.747259	0.502399	1.48738	0.136914	1
CG13949	FBgn0031288	XLOC_000127	2L	FBtr0078017;FBtr0334795;FBtr0334796	1.17314	0.204735	0.260603	0.78562	0.43209	1
CG13950	FBgn0031289	XLOC_000129	2L	FBtr0078018	15.8951	0.236379	0.509413	0.464023	0.642631	1
CG13955	FBgn0033412	XLOC_005445	2R	FBtr0088551	3.33596	0.437305	0.433631	1.00847	0.313228	1
CG13957	FBgn0030739	XLOC_015231	X	FBtr0336975	1508.22	0.329281	0.329176	1.00032	0.317156	0.844864
CG13965	FBgn0032834	XLOC_003200	2L	FBtr0081308	26.6292	-0.590968	0.486961	-1.21358	0.224906	1
CG13970	FBgn0032851	XLOC_003216	2L	FBtr0089388	8.26256	0.667433	0.513112	1.30075	0.193343	1
CG13978	FBgn0039518	XLOC_011840	3R	FBtr0085182	1.03366	0.190544	0.252882	0.753492	0.451154	1
CG13982	FBgn0031811	XLOC_000558	2L	FBtr0343151;FBtr0079256	47.6302	0.0818422	0.477592	0.171364	0.863937	1
CG13984	FBgn0260452	XLOC_000550	2L	FBtr0079247	3.54599	0.309585	0.372027	0.832158		1
CG13989	FBgn0031786	XLOC_000543	2L	FBtr0079204	0.56801	-0.194549	0.245753	-0.791644	0.428568	1
CG1399	FBgn0033212	XLOC_005296	2R	FBtr0300780;FBtr0332911;FBtr0088940;FBtr0088939;FBtr0332912;FBtr0300779	68.3427	-0.083744	0.43064	-0.194464	0.845813	0.990059
CG13993	FBgn0031776	XLOC_000532	2L	FBtr0079191;FBtr0343125	69.3884	0.310841	0.38971	0.797621	0.425091	0.913587
CG13994	FBgn0031772	XLOC_000530	2L	FBtr0343122;FBtr0079188	59.5704	-0.285091	0.41602	-0.68528	0.493167	0.932543
CG13995	FBgn0031770	XLOC_000528	2L	FBtr0079187	132.54	-0.2813	0.329765	-0.853031	0.393642	0.896232
CG13996	FBgn0031763	XLOC_000524	2L	FBtr0079181	1.17314	0.204735	0.260603	0.78562	0.43209	1
CG13998	FBgn0040949	XLOC_002206	2L	FBtr0079241	1.47666	0.245534	0.281661	0.871737	0.383352	1
CG13999	FBgn0031753	XLOC_002205	2L	FBtr0079150	4.6281	-0.0703002	0.44073	-0.159509	0.873268	1
CG14000	FBgn0031749	XLOC_002200	2L	FBtr0079153	103.922	-0.325268	0.369986	-0.879137	0.379327	0.888159
CG14005	FBgn0031739	XLOC_002190	2L	FBtr0332037;FBtr0079160	2.78782	0.0528811	0.399298	0.132435	0.89464	1
CG14006	FBgn0031733	XLOC_002186	2L	FBtr0332555	127.426	-0.278079	0.349107	-0.796545	0.425715	0.913587
CG14010	FBgn0031725	XLOC_002178	2L	FBtr0302933;FBtr0343246	0.92109	-0.201544	0.250875	-0.803366	0.421763	1
CG14014	FBgn0031718	XLOC_002173	2L	FBtr0114511	15.7117	-0.437898	0.511642	-0.855868	0.392071	1
CG14015	FBgn0031716	XLOC_002171	2L	FBtr0079126	3.88484	0.217141	0.407083	0.533408	0.593751	1
CG14017;GluRIIA		XLOC_000479	2L	FBtr0079104;FBtr0079106	0.674208	-0.194293	0.245566	-0.791208	0.428823	1
CG14020	FBgn0031707	XLOC_000470	2L	FBtr0079094	85.9566	0.093763	0.38151	0.245768	0.805862	0.985388
CG14022	FBgn0031700	XLOC_002159	2L	FBtr0343227;FBtr0079080	47.6054	0.12251	0.417747	0.293263	0.769321	1
CG14024	FBgn0031697	XLOC_002157	2L	FBtr0329970;FBtr0079082	40.5357	0.305027	0.489304	0.62339	0.533028	1
CG14034	FBgn0250847	XLOC_002151	2L	FBtr0346459;FBtr0110802	6.83137	-0.684292	0.474289	-1.44277	0.149084	1
CG14036	FBgn0031677	XLOC_002142	2L	FBtr0079029	2.21423	0.18542	0.358703	0.516917	0.605214	1
CG14040	FBgn0031676	XLOC_000439	2L	FBtr0079009	3.28254	0.0374346	0.436772	0.0857073	0.931699	1
CG14042	FBgn0260451	XLOC_000437	2L	FBtr0079005;FBtr0346510;FBtr0110983;FBtr0333535;FBtr0333534	37.6098	0.141601	0.462094	0.306434	0.759275	1
CG14043	FBgn0031659	XLOC_000431	2L	FBtr0078995	11.9285	-0.25792	0.514859	-0.500953	0.616404	1
CG14044	FBgn0031650	XLOC_000425	2L	FBtr0078990	186.071	0.246645	0.360524	0.68413	0.493893	0.932543
CG14050	FBgn0040392	XLOC_015683	X	FBtr0070407;FBtr0308937	414.562	0.581337	0.32959	1.76382	0.0777622	0.542797
CG14053	FBgn0029603	XLOC_015669	X	FBtr0331383;FBtr0070424	1.70787	0.0611937	0.301902	0.202694	0.839375	1
CG14054	FBgn0029596	XLOC_015657	X	FBtr0070338	65.6022	-0.4059	0.42773	-0.948963	0.342639	0.865661
CG14057	FBgn0036696	XLOC_009704	3L	FBtr0300718;FBtr0075286	51.2702	-0.400263	0.448928	-0.891597	0.372609	1
CG14069	FBgn0032315	XLOC_002618	2L	FBtr0340557	2.29035	0.178088	0.358037	0.497401	0.618906	1
CG1407	FBgn0033474	XLOC_005489	2R	FBtr0330325;FBtr0339420;FBtr0339419;FBtr0339418;FBtr0088436;FBtr0300719	117.738	0.23891	0.365801	0.653115	0.513682	0.93778
CG14070	FBgn0032313	XLOC_002615	2L	FBtr0340558;FBtr0080177	4.31455	-0.238076	0.407835	-0.583757	0.559384	1
CG14073	FBgn0036814	XLOC_009816	3L	FBtr0332801;FBtr0075084	42.0903	0.126588	0.455478	0.277924	0.781071	1
CG14074	FBgn0036818	XLOC_008140	3L	FBtr0308812	2.65753	0.111709	0.36879	0.302906	0.761961	1
CG14075	FBgn0036835	XLOC_008153	3L	FBtr0075024	8.33038	0.250902	0.486137	0.516114	0.605774	1
CG14079	FBgn0036849	XLOC_008158	3L	FBtr0075027	3.50315	-0.72286	0.410849	-1.75943	0.0785043	1
CG14085	FBgn0036859	XLOC_008165	3L	FBtr0074992	3.05985	-0.63214	0.393632	-1.60592	0.108293	1
CG14086	FBgn0036860	XLOC_008166	3L	FBtr0344806	0.92109	-0.201544	0.250875	-0.803366	0.421763	1
CG14100	FBgn0036889	XLOC_009878	3L	FBtr0074971	7.97424	0.235425	0.493734	0.476825	0.633487	1
CG14102	FBgn0036906	XLOC_009894	3L	FBtr0074928	32.8681	0.467024	0.472877	0.987622	0.323338	1
CG14103	FBgn0036908	XLOC_009895	3L	FBtr0333878;FBtr0074927	14.3638	0.645204	0.514934	1.25298	0.210212	1
CG14104	FBgn0040786	XLOC_009897	3L	FBtr0299563	88.163	-0.159087	0.410107	-0.387917	0.698077	0.970316
CG14109	FBgn0036364	XLOC_007791	3L	FBtr0331532;FBtr0075850	1.68522	-0.168889	0.329931	-0.51189	0.608728	1
CG14110	FBgn0036352	XLOC_007787	3L	FBtr0075844	1.01101	-0.032415	0.257769	-0.125752	0.899928	1
CG14113	FBgn0040814	XLOC_007781	3L	FBtr0075837	0.631692	0.177839	0.247149	0.719562	0.471795	1
CG14117	FBgn0036331	XLOC_007747	3L	FBtr0332074;FBtr0306091	13.9466	-0.972594	0.508164	-1.91394	0.055628	1
CG14118	FBgn0036323	XLOC_007743	3L	FBtr0075870	1.01131	-0.202933	0.251888	-0.805647	0.420446	1
CG14120	FBgn0036321	XLOC_007741	3L	FBtr0075868	91.5917	0.818605	0.410347	1.99491	0.0460528	0.444004
CG14125	FBgn0036232	XLOC_007677	3L	FBtr0310535;FBtr0076044	247.042	-0.465355	0.339623	-1.37021	0.170621	0.712266
CG14130	FBgn0036210	XLOC_007663	3L	FBtr0076031	35.017	0.175611	0.456222	0.384924	0.700294	1
CG14131	FBgn0036205	XLOC_007660	3L	FBtr0332128;FBtr0076028	120.605	-0.229623	0.336184	-0.683029	0.494589	0.932543
CG14132	FBgn0040817	XLOC_009334	3L	FBtr0113334	3.76701	0.158097	0.458901	0.344511	0.730462	1
CG14135	FBgn0036193	XLOC_007652	3L	FBtr0332762;FBtr0290309	3.49747	-0.0401296	0.449295	-0.0893168	0.92883	1
CG14141	FBgn0036146	XLOC_007608	3L	FBtr0076164	50.6094	-0.455251	0.410611	-1.10872	0.267552	1
CG14142	FBgn0036143	XLOC_007606	3L	FBtr0300349;FBtr0300348;FBtr0300347	34.2388	-0.442669	0.464793	-0.952399	0.340895	1
CG14147	FBgn0036112	XLOC_007585	3L	FBtr0076194	1.57932	-0.367489	0.322567	-1.13927	0.254592	1
CG14151	FBgn0036089	XLOC_009241	3L	FBtr0076280	0.56801	-0.194549	0.245753	-0.791644	0.428568	1
CG14153	FBgn0036094	XLOC_007564	3L	FBtr0076259	57.3111	-0.342458	0.407685	-0.840006	0.400905	0.90042
CG14154	FBgn0036093	XLOC_007563	3L	FBtr0076258;FBtr0076257	33.6626	-0.282043	0.45691	-0.617282	0.537049	1
CG1416	FBgn0032961	XLOC_001720	2L	FBtr0085905;FBtr0085904;FBtr0085903	19.187	0.226379	0.498711	0.453928	0.649881	1
CG14160	FBgn0036066	XLOC_009217	3L	FBtr0076316	105.675	-0.335688	0.351341	-0.955448	0.339351	0.864516
CG14174	FBgn0036036	XLOC_007519	3L	FBtr0076402	39.7084	0.141067	0.468399	0.301168	0.763287	1
CG1418	FBgn0033468	XLOC_005483	2R	FBtr0088440	16.4222	-0.591791	0.502524	-1.17764	0.238941	1
CG14182	FBgn0036922	XLOC_009914	3L	FBtr0346534;FBtr0331802;FBtr0074913;FBtr0331801	4.65902	0.25124	0.442651	0.567582	0.570319	1
CG14183;CG14184		XLOC_009919	3L	FBtr0074907;FBtr0074872;FBtr0302366	28.3035	-0.460509	0.484818	-0.949859	0.342184	1
CG14186	FBgn0036935	XLOC_009921	3L	FBtr0074870	1.07469	0.234959	0.277667	0.846188	0.397448	1
CG14190	FBgn0030979	XLOC_015379	X	FBtr0074663	81.3303	-0.0688011	0.39132	-0.175818	0.860437	0.992493
CG14191	FBgn0030981	XLOC_015381	X	FBtr0074665	0.92109	-0.201544	0.250875	-0.803366	0.421763	1
CG14194	FBgn0030996	XLOC_015388	X	FBtr0336701;FBtr0074671	7.8664	-0.396907	0.512522	-0.774419	0.438683	1
CG14195	FBgn0030998	XLOC_016658	X	FBtr0074692;FBtr0343593	25.2879	0.0552394	0.499488	0.110592	0.91194	1
CG14196	FBgn0031002	XLOC_016659	X	FBtr0074691	11.4578	0.188363	0.515153	0.365646	0.714629	1
CG14204	FBgn0031032	XLOC_015412	X	FBtr0074729;FBtr0336898	34.041	-0.0243816	0.449668	-0.0542214	0.956759	1
CG14205	FBgn0031034	XLOC_015413	X	FBtr0074730	21.9105	0.0175596	0.48615	0.0361196	0.971187	1
CG14207	FBgn0031037	XLOC_015415	X	FBtr0074734;FBtr0074733;FBtr0345918;FBtr0307161	23.8614	0.499895	0.491108	1.01789	0.308729	1
CG14210	FBgn0031040	XLOC_015417	X	FBtr0344070;FBtr0074740	41.1097	0.289302	0.432298	0.66922	0.503355	1
CG14215	FBgn0031052	XLOC_015421	X	FBtr0074746;FBtr0345016	22.8231	0.16839	0.486306	0.346263	0.729145	1
CG14218	FBgn0031031	XLOC_016680	X	FBtr0308569;FBtr0308568	2.12852	-0.192698	0.323389	-0.59587	0.551262	1
CG14219	FBgn0031033	XLOC_016681	X	FBtr0074769	7.25841	0.524618	0.50961	1.02945	0.303268	1
CG14220	FBgn0031036	XLOC_016682	X	FBtr0307162;FBtr0074768	107.743	-0.525402	0.365472	-1.4376	0.150548	0.69473
CG14221	FBgn0031042	XLOC_016684	X	FBtr0290086;FBtr0332485	2.31691	-0.0370925	0.385489	-0.096222	0.923344	1
CG14223	FBgn0031053	XLOC_016690	X	FBtr0332891;FBtr0332890;FBtr0074758	1.7489	0.0868664	0.332352	0.261368	0.793808	1
CG14227	FBgn0031058	XLOC_016694	X	FBtr0300350	117.502	0.0397533	0.338599	0.117405	0.906539	0.992493
CG14229	FBgn0031059	XLOC_016696	X	FBtr0335023;FBtr0074753;FBtr0344968	7.2575	0.443869	0.472686	0.939036	0.347712	1
CG14230	FBgn0031062	XLOC_015426	X	FBtr0074787	16.9576	0.0265665	0.503993	0.052712	0.957961	1
CG14231	FBgn0031060	XLOC_016697	X	FBtr0309217;FBtr0074814	284.846	0.194329	0.312894	0.621071	0.534553	0.93778
CG14232	FBgn0031061	XLOC_016698	X	FBtr0074813;FBtr0309218	28.8283	0.0387121	0.515366	0.0751158	0.940123	1
CG14234	FBgn0031065	XLOC_015430	X	FBtr0074790	94.1625	-0.477711	0.374902	-1.27423	0.202582	0.748688
CG14237	FBgn0039428	XLOC_011771	3R	FBtr0330153	0.612556	0.176021	0.246291	0.714687	0.474802	1
CG14238	FBgn0039429	XLOC_011772	3R	FBtr0085014	1.74858	-0.0960421	0.308633	-0.311185	0.75566	1
CG14245	FBgn0039452	XLOC_011789	3R	FBtr0339240	1.1026	0.192537	0.253764	0.758724	0.448017	1
CG14246	FBgn0040608	XLOC_011788	3R	FBtr0344267;FBtr0100441;FBtr0339239	1.36409	-0.0829374	0.282715	-0.29336	0.769247	1
CG14247	FBgn0039454	XLOC_011790	3R	FBtr0085043	1.55278	-0.043159	0.295159	-0.146223	0.883745	1
CG14252	FBgn0039462	XLOC_011802	3R	FBtr0085067	0.92109	-0.201544	0.250875	-0.803366	0.421763	1
[truncated: 11,230 more rows]

## Sheet: D
Figure 5-Figure supplement 1D
gene_name	gene_id	XLOC	chr	transcript_id	baseMean	log2FoldChange	lfcSE	stat	pvalue	padj
128up	FBgn0010339	XLOC_003914	2R	FBtr0087976	8.31844	0.58485	0.596168	0.981016	0.326585	1
140up	FBgn0010340	XLOC_012867	3R	FBtr0337095;FBtr0082909	296.119	-0.407672	0.252665	-1.61349	0.106638	0.50972
14-3-3epsilon	FBgn0020238	XLOC_011169	3R	FBtr0083566;FBtr0083568;FBtr0083567;FBtr0083565	119.111	-0.495691	0.322306	-1.53795	0.12406	0.543465
14-3-3zeta	FBgn0004907	XLOC_003785	2R	FBtr0088416;FBtr0088418;FBtr0088415;FBtr0088412;FBtr0100182;FBtr0100183;FBtr0088413;FBtr0088419;FBtr0088417;FBtr0088414;FBtr0332916;FBtr0332917	181.071	-0.137941	0.316362	-0.436024	0.66282	0.933856
18SrRNA-Psi:CR41602	FBgn0085813	XLOC_015543	X	FBtr0346892	227.521	-0.839156	0.50968	-1.64644		1
18w	FBgn0004364	XLOC_004645	2R	FBtr0086309	9.90571	-0.246604	0.589509	-0.41832	0.675713	1
26-29-p	FBgn0250848	XLOC_007811	3L	FBtr0075766	13.3418	-0.931183	0.557308	-1.67086	0.0947498	1
28SrRNA-Psi:CR40741	FBgn0085771	XLOC_015547	X	FBtr0346896	212.842	-1.92639	0.589765	-3.26636	0.00108938	0.0285417
28SrRNA-Psi:CR41609	FBgn0085819	XLOC_016860	X	FBtr0346904	163.451	-3.17402	0.399967	-7.93569	2.09321e-15	1.63659e-12
28SrRNA-Psi:CR45853	FBgn0267513	XLOC_015539	X	FBtr0346888	6.37881	-0.67877	0.594585	-1.14159	0.253626	1
28SrRNA-Psi:CR45855	FBgn0267515	XLOC_015542	X	FBtr0346891	1.2514	0.414866	0.399985	1.0372	0.299641	1
28SrRNA-Psi:CR45859	FBgn0267519	XLOC_015546	X	FBtr0346895	1518.24	-1.41787	0.57753	-2.45506		1
28SrRNA-Psi:CR45860	FBgn0267520	XLOC_016861	X	FBtr0346903	15.9774	-1.05978	0.600759	-1.76407	0.0777209	1
2mit;CR45109		XLOC_012795	3R	FBtr0330143;FBtr0344730;FBtr0344729;FBtr0344731	25.3424	-0.315516	0.520485	-0.606197	0.544384	0.894988
4EHP;Syx1A		XLOC_013544	3R	FBtr0084587;FBtr0303160;FBtr0303159;FBtr0300475;FBtr0303161;FBtr0084588	53.7476	-0.12233	0.416678	-0.293584	0.769076	0.959698
4E-T	FBgn0052016	XLOC_014201	4	FBtr0334626;FBtr0310651;FBtr0089233;FBtr0089229	6.83829	0.90061	0.600993	1.49854	0.133994	1
5-HT1A	FBgn0004168	XLOC_004558	2R	FBtr0086577	2.47268	-0.208648	0.537847	-0.387932	0.698067	1
5-HT1B	FBgn0263116	XLOC_006205	2R	FBtr0330056;FBtr0330055;FBtr0086599	0.818111	-0.0223871	0.361464	-0.0619345	0.950615	1
5-HT2A	FBgn0087012	XLOC_010194	3R	FBtr0300474;FBtr0339397;FBtr0078855;FBtr0078854;FBtr0339395	4.04323	-0.17144	0.570087	-0.300726	0.763623	1
5-HT2B	FBgn0261929	XLOC_010474	3R	FBtr0330144;FBtr0339322	1.4522	0.05721	0.453406	0.126178	0.899591	1
5-HT7	FBgn0004573	XLOC_014045	3R	FBtr0334508;FBtr0085746	0.412693	0.246714	0.322651	0.764646	0.444482	1
5PtaseI	FBgn0259178	XLOC_013626	3R	FBtr0299662;FBtr0299660;FBtr0299661	281.656	-0.567557	0.244751	-2.31892	0.0203992	0.217208
7B2	FBgn0041707	XLOC_010229	3R	FBtr0301640;FBtr0078789	0.592718	-0.244268	0.330703	-0.738634	0.460129	1
7SLRNA:CR32864	FBgn0000003	XLOC_010345	3R	FBtr0081624	231.111	-0.420902	0.596347	-0.7058	0.480312	0.870735
7SLRNA:CR42652	FBgn0261504	XLOC_012320	3R	FBtr0302398	452.697	-0.758995	0.580924	-1.30653	0.191372	0.644541
a	FBgn0000008	XLOC_004821	2R	FBtr0342981;FBtr0100521;FBtr0071763;FBtr0071764	51.9133	1.1248	0.448217	2.50951	0.01209	0.158541
a10	FBgn0011293	XLOC_009700	3L	FBtr0075290	0.26343	-0.205717	0.311207	-0.661028	0.508594	1
A16	FBgn0028965	XLOC_002745	2L	FBtr0080427	7.2464	-0.518545	0.603527	-0.859191	0.390235	1
A2bp1	FBgn0052062	XLOC_007557	3L	FBtr0305097;FBtr0305093;FBtr0305094;FBtr0113419;FBtr0113418;FBtr0305096;FBtr0332985;FBtr0305095	9.02688	0.308197	0.586255	0.525705	0.599093	1
a6	FBgn0023130	XLOC_015630	X	FBtr0333116;FBtr0330407;FBtr0070279	26.1184	-0.684108	0.495552	-1.3805	0.167434	0.622953
Aac11	FBgn0027885	XLOC_003028	2L	FBtr0081001	19.0321	-0.498874	0.514208	-0.970179	0.331957	0.773436
Aatf	FBgn0031851	XLOC_000576	2L	FBtr0079299	6.83067	-0.0824058	0.605321	-0.136136	0.891714	1
Aats-ala	FBgn0027094	XLOC_002413	2L	FBtr0079722;FBtr0079721	18.5508	0.087876	0.548109	0.160326	0.872624	0.980874
Aats-ala-m	FBgn0028962	XLOC_007209	3L	FBtr0077168	9.48721	-0.200948	0.590052	-0.34056	0.733435	1
Aats-arg	FBgn0027093	XLOC_016428	X	FBtr0074178	4.05539	-0.398136	0.583125	-0.682764	0.494756	1
Aats-asn	FBgn0086443	XLOC_003143	2L	FBtr0332578;FBtr0081162	14.9849	-0.177212	0.547439	-0.323712	0.746156	1
Aats-cys	FBgn0027091	XLOC_004251	2R	FBtr0087234	11.7695	-0.297206	0.591771	-0.502231	0.615505	1
Aats-gln	FBgn0027090	XLOC_013644	3R	FBtr0084866	18.1919	0.742689	0.536179	1.38515	0.166006	0.621445
Aats-glupro	FBgn0005674	XLOC_013536	3R	FBtr0084512;FBtr0084511	96.9638	-1.47069	0.471349	-3.12018	0.00180744	0.0416301
Aats-gly	FBgn0027088	XLOC_007862	3L	FBtr0333934;FBtr0075633;FBtr0075632	18.977	0.337244	0.515473	0.654243	0.512955	0.885038
Aats-his;Bx		XLOC_015351	X	FBtr0333805;FBtr0333806;FBtr0333804;FBtr0074593;FBtr0340363;FBtr0340364;FBtr0340366;FBtr0340365	13.6224	-0.301692	0.562685	-0.536164	0.591845	1
Aats-ile	FBgn0027086	XLOC_008403	3L	FBtr0078500;FBtr0078499;FBtr0078498	11.6799	0.361762	0.586409	0.616911	0.537293	1
Aats-leu	FBgn0027085	XLOC_007197	3L	FBtr0073348	5.73716	1.02825	0.585485	1.75623	0.079049	1
Aats-lys	FBgn0027084	XLOC_016080	X	FBtr0303560;FBtr0071367;FBtr0071366	13.7307	-0.395429	0.57025	-0.69343	0.48804	1
Aats-met	FBgn0027083	XLOC_012884	3R	FBtr0347148;FBtr0337021;FBtr0082895	0.442345	0.244242	0.321051	0.760758	0.446802	1
Aats-phe	FBgn0020766	XLOC_004091	2R	FBtr0087594	22.2995	0.29105	0.510293	0.570359	0.568434	0.902274
Aats-pro	FBgn0027082	XLOC_008698	3L	FBtr0333447;FBtr0072948	629.633	0.0452899	0.213872	0.211762	0.832292	0.974778
Aats-ser	FBgn0021750	XLOC_010947	3R	FBtr0334589	374.656	-0.0965689	0.237803	-0.406088	0.684678	0.939361
Aats-thr	FBgn0027081	XLOC_001025	2L	FBtr0080332;FBtr0080331;FBtr0346436;FBtr0080333	61.7147	0.470356	0.387832	1.21278	0.225213	0.68181
Aats-trp	FBgn0010803	XLOC_012502	3R	FBtr0081981	10.0916	-0.150428	0.582961	-0.258041	0.796375	1
Aats-tyr	FBgn0027080	XLOC_009659	3L	FBtr0075410	4.83236	-0.33817	0.591025	-0.572175	0.567203	1
Aats-tyr-m	FBgn0035064	XLOC_006807	2R	FBtr0072429	27.3793	0.512177	0.470318	1.089	0.276153	0.73404
Aats-val	FBgn0027079	XLOC_004032	2R	FBtr0333148;FBtr0087734;FBtr0087735	39.8537	0.146113	0.498729	0.292971	0.769544	0.959698
aay	FBgn0023129	XLOC_007488	3L	FBtr0076457	42.8613	-0.243382	0.408453	-0.595863	0.551267	0.897035
abd-A	FBgn0000014	XLOC_013054	3R	FBtr0306337;FBtr0083388;FBtr0300485;FBtr0083387	6.10598	0.848374	0.605283	1.40162	0.16103	1
Abd-B	FBgn0000015	XLOC_013057	3R	FBtr0083385;FBtr0346764;FBtr0083384;FBtr0083383;FBtr0083382;FBtr0083381	1.90084	0.165968	0.47968	0.345996	0.729345	1
Abi	FBgn0020510	XLOC_012866	3R	FBtr0112896;FBtr0337096;FBtr0337097;FBtr0307077;FBtr0307076;FBtr0082910	7.4261	-0.0973759	0.603024	-0.161479	0.871716	1
Abl	FBgn0000017	XLOC_009677	3L	FBtr0345369;FBtr0112790;FBtr0330133;FBtr0330135;FBtr0330136;FBtr0330134;FBtr0330132;FBtr0330131;FBtr0330130;FBtr0075357	17.2734	-0.573612	0.549235	-1.04438	0.296308	1
abo	FBgn0000018	XLOC_002623	2L	FBtr0080168	2.39536	0.56248	0.538011	1.04548	0.295801	1
Abp1	FBgn0036372	XLOC_009472	3L	FBtr0075819	170.744	0.578488	0.293262	1.9726	0.0485414	0.353699
abs	FBgn0015331	XLOC_010161	3R	FBtr0078967	5.20149	0.160744	0.595975	0.269716	0.787379	1
ab;snoRNA:Me18S-G642		XLOC_000958	2L	FBtr0332560;FBtr0332557;FBtr0332558;FBtr0332561;FBtr0114311;FBtr0332562	2.75294	-0.00468882	0.545371	-0.00859748	0.99314	1
ac	FBgn0000022	XLOC_014323	X	FBtr0070072	7.9421	-1.49146	0.600216	-2.48488	0.0129597	1
Ac13E	FBgn0022710	XLOC_016398	X	FBtr0100142;FBtr0332497;FBtr0074073	88.7469	0.29093	0.3231	0.900431	0.367891	0.803345
Ac3	FBgn0023416	XLOC_001715	2L	FBtr0100324;FBtr0085897	204.571	0.199158	0.333545	0.597095	0.550444	0.897035
Ac76E	FBgn0004852	XLOC_008215	3L	FBtr0304746;FBtr0074897	7.73693	0.0426809	0.604004	0.0706632	0.943666	1
Ac78C	FBgn0024150	XLOC_010013	3L	FBtr0305501;FBtr0330066;FBtr0333358;FBtr0330067	1.82852	-0.332089	0.491104	-0.676209	0.498908	1
ACC	FBgn0033246	XLOC_005322	2R	FBtr0339123;FBtr0113053;FBtr0088872;FBtr0088871;FBtr0339124;FBtr0339125	87.5218	-0.11991	0.377579	-0.317576	0.750807	0.956092
AcCoAS	FBgn0012034	XLOC_010021	3L	FBtr0078413;FBtr0078414;FBtr0333126	123.843	-1.31781	0.324409	-4.06218	4.86171e-05	0.00241892
Ace	FBgn0000024	XLOC_012799	3R	FBtr0335223;FBtr0082780;FBtr0300486	12.1755	-0.823305	0.578563	-1.42302	0.154731	1
Acer	FBgn0016122	XLOC_000726	2L	FBtr0079685;FBtr0333416	60.5738	0.0469669	0.374738	0.125333	0.90026	0.986351
Acf1	FBgn0027620	XLOC_012117	3R	FBtr0085845	21.5358	0.459646	0.522686	0.879392	0.379189	0.810791
achi	FBgn0033749	XLOC_005697	2R	FBtr0339635;FBtr0087943;FBtr0087942	1.96534	-0.249834	0.453971	-0.550331	0.582092	1
acj6	FBgn0000028	XLOC_016388	X	FBtr0305191;FBtr0100328;FBtr0305189;FBtr0305192;FBtr0305194;FBtr0305196;FBtr0305195;FBtr0305193;FBtr0305190;FBtr0290064;FBtr0290063;FBtr0100326;FBtr0074015	6.24747	-0.0454272	0.605321	-0.0750464	0.940178	1
Ack	FBgn0028484	XLOC_007143	3L	FBtr0073211	77.8059	0.152021	0.389892	0.389904	0.696607	0.941763
Ack-like	FBgn0263998	XLOC_005740	2R	FBtr0330331;FBtr0330329;FBtr0330332;FBtr0330330	15.157	-0.805758	0.588299	-1.36964	0.170799	1
Acn	FBgn0263198	XLOC_001461	2L	FBtr0081144;FBtr0081145;FBtr0336842	24.1077	0.52044	0.488799	1.06473	0.286997	0.747938
Acon	FBgn0010100	XLOC_001620	2L	FBtr0346587;FBtr0081473;FBtr0300425;FBtr0343871	73.961	-0.0435384	0.417956	-0.10417	0.917035	0.988562
Acox57D-d	FBgn0034629	XLOC_004775	2R	FBtr0071607	78.5284	-0.062627	0.393663	-0.159088	0.8736	0.981566
Acox57D-p	FBgn0034628	XLOC_004774	2R	FBtr0071606;FBtr0342891	22.7696	-0.0279522	0.510415	-0.0547637	0.956327	0.991847
Acp24A4	FBgn0051779	XLOC_002046	2L	FBtr0305673;FBtr0110767	1.66853	0.522761	0.435805	1.19953	0.230322	1
Acp26Aa	FBgn0002855	XLOC_002196	2L	FBtr0079155	3.55923	-1.33359	0.576531	-2.31313	0.0207155	1
Acp26Ab	FBgn0002856	XLOC_002195	2L	FBtr0079157;FBtr0079156;FBtr0342618	2.48867	-0.566898	0.55267	-1.02574	0.305012	1
Acp32CD	FBgn0023415	XLOC_000945	2L	FBtr0344020;FBtr0080158	16.8191	0.660683	0.551425	1.19814	0.230863	1
Acp36DE	FBgn0011559	XLOC_003079	2L	FBtr0340581;FBtr0081054	174.221	-0.20176	0.306593	-0.658071	0.510493	0.885009
Acp53C14a	FBgn0034152	XLOC_006022	2R	FBtr0345494;FBtr0087082	101.923	0.710094	0.390386	1.81895	0.0689185	0.421914
Acp53C14b	FBgn0034153	XLOC_006023	2R	FBtr0345493;FBtr0087081	2.39074	0.886324	0.51569	1.71871	0.0856664	1
Acp53C14c	FBgn0053530	XLOC_006025	2R	FBtr0303024;FBtr0091496	0.400979	-0.226108	0.3219	-0.702416	0.482419	1
Acp54A1	FBgn0083936	XLOC_004355	2R	FBtr0110768	3.12501	0.433899	0.537983	0.80653	0.419937	1
Acp62F	FBgn0020509	XLOC_007034	3L	FBtr0072943	14.5024	-0.0112671	0.549249	-0.0205136	0.983634	1
Acp63F	FBgn0015585	XLOC_008767	3L	FBtr0073182;FBtr0346805	24.6604	-0.339879	0.488933	-0.695143	0.486966	0.8747
Acp76A	FBgn0015586	XLOC_009835	3L	FBtr0308781;FBtr0075038	5.20903	-0.00049322	0.590123	-0.000835792	0.999333	1
Acp95EF	FBgn0002863	XLOC_011563	3R	FBtr0084561	21.7168	0.160177	0.502139	0.31899	0.749734	0.955588
Acp98AB	FBgn0263597	XLOC_011857	3R	FBtr0310089	1.69374	0.64224	0.467522	1.37371	0.169532	1
Acph-1	FBgn0000032	XLOC_013953	3R	FBtr0085610;FBtr0085609	1.12291	0.203989	0.425194	0.479755	0.631402	1
Acsl	FBgn0263120	XLOC_003647	2R	FBtr0100427;FBtr0100426;FBtr0088700;FBtr0088699;FBtr0100428;FBtr0100430;FBtr0100429;FBtr0333001;FBtr0088701;FBtr0100431	105.693	-0.596953	0.361625	-1.65075	0.0987893	0.488855
Act42A	FBgn0000043	XLOC_005164	2R	FBtr0086029	22.4688	-1.11394	0.543664	-2.04895	0.0404665	0.318667
Act57B;snoRNA:660		XLOC_004720	2R	FBtr0071519;FBtr0091781	34.6394	0.0886211	0.515022	0.172072	0.863381	0.979523
Act5C	FBgn0000042	XLOC_014616	X	FBtr0070822;FBtr0100663;FBtr0100662;FBtr0345894;FBtr0070823	873.285	-0.515711	0.267533	-1.92765	0.0538986	0.373874
Act79B	FBgn0000045	XLOC_008388	3L	FBtr0334090;FBtr0078478	2.43465	0.0803281	0.549677	0.146137	0.883813	1
Act87E	FBgn0000046	XLOC_010839	3R	FBtr0082785;FBtr0346242;FBtr0082786	14.1294	-0.317077	0.553547	-0.57281	0.566773	1
Act88F	FBgn0000047	XLOC_010957	3R	FBtr0083143	3.09838	0.115452	0.545233	0.211747	0.832304	1
Actbeta	FBgn0024913	XLOC_014209	4	FBtr0089209	40.4346	-0.12995	0.488761	-0.265876	0.790335	0.961582
Actn3	FBgn0015008	XLOC_013058	3R	FBtr0083380	0.592718	-0.244268	0.330703	-0.738634	0.460129	1
Actn;usp		XLOC_015651	X	FBtr0070345;FBtr0310657;FBtr0333802;FBtr0333801;FBtr0310658;FBtr0303048;FBtr0310659;FBtr0070344;FBtr0070343;FBtr0070346;FBtr0333803	361.831	0.151307	0.245007	0.617565	0.536862	0.891188
ACXA	FBgn0040510	XLOC_001060	2L	FBtr0305491;FBtr0344132;FBtr0333225;FBtr0305490;FBtr0080415	3.58806	-0.0457697	0.558796	-0.0819078	0.93472	1
ACXB	FBgn0040509	XLOC_001059	2L	FBtr0080414	0.761496	-0.246955	0.332224	-0.743339	0.457276	1
ACXC	FBgn0040508	XLOC_001058	2L	FBtr0100494;FBtr0080413	1.09326	0.208924	0.426454	0.489909	0.624198	1
ACXD	FBgn0040507	XLOC_007002	3L	FBtr0332662;FBtr0072874	20.0797	-0.0688852	0.536505	-0.128396	0.897835	0.986351
ACXE	FBgn0040506	XLOC_001061	2L	FBtr0310556	3.00659	-0.198771	0.553926	-0.358841	0.719714	1
Acyp	FBgn0025115	XLOC_001148	2L	FBtr0080555;FBtr0343668	0.813672	0.00936567	0.36477	0.0256756	0.979516	1
Acyp2	FBgn0038363	XLOC_010978	3R	FBtr0083174;FBtr0334591	13.3313	0.995084	0.574332	1.73259	0.083168	1
Ada	FBgn0037661	XLOC_010513	3R	FBtr0081971	4.67855	0.389769	0.575153	0.677679	0.497975	1
Ada1-1	FBgn0051865	XLOC_001008	2L	FBtr0080289;FBtr0345286	23.0803	0.301133	0.508438	0.59227	0.55367	0.897035
Ada2a;Rpb4		XLOC_013147	3R	FBtr0310381;FBtr0310383;FBtr0310382;FBtr0310380;FBtr0310379;FBtr0310384	9.24366	-0.0531557	0.587442	-0.0904867	0.9279	1
Ada2b	FBgn0037555	XLOC_012427	3R	FBtr0334315;FBtr0100368;FBtr0081807	101.726	0.0650575	0.333626	0.195001	0.845392	0.977488
Adam	FBgn0027619	XLOC_003770	2R	FBtr0088387;FBtr0339425	55.8879	-0.202538	0.389233	-0.520352	0.602819	0.913913
AdamTS-A	FBgn0038341	XLOC_012971	3R	FBtr0339398;FBtr0334629;FBtr0083160	51.6469	-0.663137	0.384286	-1.72563	0.0844133	0.455055
adat	FBgn0028658	XLOC_002799	2L	FBtr0080573;FBtr0331627	9912.58	-0.236988	0.198597	-1.19331	0.232747	0.687439
ADD1	FBgn0026573	XLOC_003907	2R	FBtr0346629;FBtr0088041;FBtr0088042	15.3137	0.547628	0.577165	0.948824	0.34271	1
ade2	FBgn0000052	XLOC_002220	2L	FBtr0079221;FBtr0079219;FBtr0079220	17.5281	0.349093	0.57044	0.611972	0.540556	1
ade3	FBgn0000053	XLOC_002306	2L	FBtr0339663;FBtr0079431;FBtr0100353	32.2107	0.37539	0.457715	0.820139	0.412137	0.833429
ade5	FBgn0020513	XLOC_016242	X	FBtr0333799;FBtr0073705	30.5298	-1.23376	0.545666	-2.26102	0.0237581	0.239462
AdenoK	FBgn0036337	XLOC_009431	3L	FBtr0346531;FBtr0075896;FBtr0075895	20.1317	-0.137429	0.521136	-0.263711	0.792002	0.961582
Adf1	FBgn0000054	XLOC_003475	2R	FBtr0086111;FBtr0086113;FBtr0086112	5.87755	-0.123014	0.604239	-0.203585	0.838677	1
Adgf-A;Msi		XLOC_009748	3L	FBtr0075191;FBtr0075190;FBtr0075192;FBtr0110847;FBtr0110846	10.5048	-0.262169	0.579873	-0.452115	0.651186	1
Adgf-C	FBgn0038173	XLOC_010853	3R	FBtr0082821	13.1282	0.506184	0.568146	0.89094	0.372962	1
Adgf-D	FBgn0038172	XLOC_012840	3R	FBtr0082845	1.82897	0.192562	0.519755	0.370486	0.71102	1
Adgf-E	FBgn0033952	XLOC_005858	2R	FBtr0087482	9.5187	-0.299161	0.353857	-0.845429		1
Adh;Adhr		XLOC_001189	2L	FBtr0100594;FBtr0100589;FBtr0100591;FBtr0100590;FBtr0100593;FBtr0343699	168.45	-0.34608	0.293977	-1.17724	0.239101	0.692797
AdipoR	FBgn0038984	XLOC_013418	3R	FBtr0084283;FBtr0084282;FBtr0084284;FBtr0334561;FBtr0308848	40.3453	-0.354386	0.459172	-0.771793	0.440237	0.850783
Adk1	FBgn0022709	XLOC_009376	3L	FBtr0076018;FBtr0076017	2.29967	-0.843641	0.517727	-1.62951	0.103205	1
Adk2	FBgn0022708	XLOC_005000	2R	FBtr0072163	49.983	-1.28355	0.419538	-3.05944	0.00221752	0.0481606
Adk3	FBgn0042094	XLOC_012634	3R	FBtr0339379;FBtr0339378;FBtr0082330;FBtr0082331	57.121	-0.139351	0.388338	-0.35884	0.719715	0.947509
AdoR	FBgn0039747	XLOC_013973	3R	FBtr0334658;FBtr0085581	0.400979	-0.226108	0.3219	-0.702416	0.482419	1
adp	FBgn0000057	XLOC_004469	2R	FBtr0086744;FBtr0340288	8.70833	0.455588	0.604056	0.754215	0.45072	1
AdSL	FBgn0038467	XLOC_013066	3R	FBtr0083373	3.97272	0.16392	0.580107	0.282569	0.777507	1
AdSS	FBgn0027493	XLOC_013301	3R	FBtr0083991	112.094	0.0706446	0.313344	0.225453	0.821627	0.973053
Ady43A	FBgn0026602	XLOC_005250	2R	FBtr0089050	147.14	0.674059	0.345888	1.94878	0.0513218	0.366211
Aef1	FBgn0005694	XLOC_008337	3L	FBtr0330156;FBtr0078349;FBtr0078348;FBtr0078350	23.4342	0.0702276	0.498433	0.140897	0.887951	0.984307
aft	FBgn0026309	XLOC_004441	2R	FBtr0089549	242.303	-0.0998792	0.292285	-0.341719	0.732562	0.951897
Afti	FBgn0038223	XLOC_012889	3R	FBtr0310001;FBtr0310000;FBtr0273391	26.6698	0.168763	0.476664	0.354051	0.723301	0.948174
Ag5r	FBgn0015010	XLOC_016343	X	FBtr0305582;FBtr0333658;FBtr0073937	12.5124	-1.16152	0.573189	-2.02641	0.0427227	1
Ag5r2	FBgn0020508	XLOC_016342	X	FBtr0073938	8.23092	-0.354975	0.597267	-0.594331	0.55229	1
AGBE	FBgn0053138	XLOC_004030	2R	FBtr0087732	28.2399	-0.159029	0.490286	-0.32436	0.745666	0.954087
ago	FBgn0041171	XLOC_008809	3L	FBtr0073247;FBtr0073246;FBtr0073245	21.6821	-0.271636	0.534834	-0.507888	0.611532	0.919003
AGO1	FBgn0262739	XLOC_005808	2R	FBtr0305592;FBtr0087612;FBtr0087614;FBtr0087613	108.79	-0.329238	0.313275	-1.05096	0.293278	0.750688
AGO2	FBgn0087035	XLOC_007893	3L	FBtr0075560;FBtr0075559;FBtr0331933	538.934	-0.607874	0.260647	-2.33217	0.0196916	0.212989
AGO3	FBgn0250816	XLOC_008470	3L	FBtr0299882;FBtr0299881;FBtr0301725;FBtr0299880	108.553	0.69774	0.326986	2.13385	0.032855	0.285623
agt	FBgn0024912	XLOC_012304	3R	FBtr0081697	239.677	-0.220278	0.268692	-0.819814	0.412322	0.833429
Ahcy13	FBgn0014455	XLOC_015154	X	FBtr0332590;FBtr0074030;FBtr0346181	19.4147	0.218831	0.511465	0.427851	0.668759	0.9364
Ahcy89E	FBgn0015011	XLOC_013059	3R	FBtr0083378;FBtr0083379	8.11298	0.414489	0.605319	0.684745	0.493505	1
AIF	FBgn0031392	XLOC_000212	2L	FBtr0077831;FBtr0330657;FBtr0077830	12.797	-1.00066	0.575281	-1.73944	0.0819582	1
Ak6	FBgn0033754	XLOC_005700	2R	FBtr0087891	12.1694	0.0932982	0.575216	0.162197	0.871151	1
Akap200	FBgn0027932	XLOC_000711	2L	FBtr0079667;FBtr0079664;FBtr0340239;FBtr0340240;FBtr0340241;FBtr0079665;FBtr0079666	107.463	-0.369715	0.324922	-1.13786	0.25518	0.710779
AkhR	FBgn0025595	XLOC_002276	2L	FBtr0079310;FBtr0332331;FBtr0079309;FBtr0079308	0.705776	0.0577805	0.346215	0.166892	0.867455	1
akirin	FBgn0082598	XLOC_007332	3L	FBtr0302545;FBtr0076848;FBtr0302544;FBtr0076849;FBtr0302543;FBtr0332730	25.783	-0.148662	0.503838	-0.29506	0.767948	0.959584
Akt1	FBgn0010379	XLOC_011003	3R	FBtr0083227;FBtr0083226;FBtr0344717;FBtr0344470	23.0555	-0.382148	0.500789	-0.76309	0.44541	0.854144
al	FBgn0000061	XLOC_000083	2L	FBtr0078053	0.592718	-0.244268	0.330703	-0.738634	0.460129	1
Alas	FBgn0020764	XLOC_004991	2R	FBtr0072151	27.4348	-0.196918	0.477219	-0.412637	0.679873	0.939105
alc	FBgn0260972	XLOC_005424	2R	FBtr0088625;FBtr0088624	154.035	-0.196552	0.324685	-0.605363	0.544938	0.89536
ald	FBgn0000063	XLOC_011134	3R	FBtr0331348;FBtr0083478	119.285	-0.0138189	0.310225	-0.0445446	0.96447	0.992471
Ald	FBgn0000064	XLOC_013730	3R	FBtr0084994;FBtr0339614;FBtr0084999;FBtr0310660;FBtr0084995;FBtr0085000;FBtr0114544;FBtr0306657;FBtr0085001;FBtr0310661	69.774	-0.394695	0.383662	-1.02876	0.303595	0.753351
Aldh	FBgn0012036	XLOC_000782	2L	FBtr0079806;FBtr0332597	39.3433	-0.17835	0.462485	-0.385633	0.699768	0.941763
Aldh-III	FBgn0010548	XLOC_005268	2R	FBtr0300478;FBtr0310676;FBtr0300477;FBtr0088993;FBtr0310675;FBtr0336912;FBtr0300479;FBtr0088996;FBtr0310674;FBtr0300480;FBtr0308198;FBtr0300481	91.7154	0.952874	0.342603	2.78128	0.00541458	0.0911815
Alg10	FBgn0052076	XLOC_007604	3L	FBtr0076217	2.18404	-0.155291	0.522031	-0.297475	0.766104	1
Alg-2	FBgn0086378	XLOC_010151	3R	FBtr0301810	4.96851	0.605072	0.602532	1.00421	0.315275	1
Alh	FBgn0261238	XLOC_012338	3R	FBtr0334674;FBtr0334676;FBtr0334675;FBtr0300495;FBtr0300494;FBtr0113200;FBtr0081614;FBtr0334673;FBtr0081613;FBtr0334677;FBtr0334672;FBtr0081612	53.4575	-0.868606	0.400345	-2.16965	0.0300337	0.275796
alien	FBgn0013746	XLOC_002462	2L	FBtr0339550;FBtr0079781;FBtr0343095;FBtr0079780	397.757	-1.75628	0.254785	-6.89318	5.45578e-12	1.99063e-09
ALiX	FBgn0086346	XLOC_013823	3R	FBtr0085241	51.8071	-0.452834	0.423408	-1.0695	0.284845	0.744617
Alk	FBgn0040505	XLOC_006014	2R	FBtr0331926;FBtr0087118	19.4767	1.22749	0.5437	2.25766	0.0239668	0.240239
AlkB	FBgn0065035	XLOC_016432	X	FBtr0074168	5.47231	-0.11117	0.603633	-0.184169	0.853881	1
alph	FBgn0086361	XLOC_011957	3R	FBtr0309241;FBtr0085442;FBtr0085443;FBtr0085444;FBtr0085445;FBtr0085446	44.7189	0.081123	0.42984	0.188729	0.850306	0.977889
alpha4GT1	FBgn0031491	XLOC_001993	2L	FBtr0077670	52.3197	-0.550344	0.407794	-1.34956	0.177156	0.629645
alpha-Cat	FBgn0010215	XLOC_010129	3L	FBtr0339894;FBtr0070038	11.7592	-0.245962	0.574542	-0.428101	0.668577	1
alpha-catenin-related	FBgn0029105	XLOC_004989	2R	FBtr0072148	8.63878	0.518377	0.60134	0.862036	0.388668	1
alphaCOP	FBgn0025725	XLOC_008622	3L	FBtr0072812;FBtr0072811	20.6506	-0.277704	0.526274	-0.527681	0.597721	0.910979
alpha-Est1	FBgn0015568	XLOC_012383	3R	FBtr0081544	11.9273	-0.209744	0.573065	-0.366005	0.714362	1
alpha-Est10	FBgn0015569	XLOC_012371	3R	FBtr0305911;FBtr0289953;FBtr0305910	2.17063	-0.803805	0.510773	-1.5737	0.115556	1
alpha-Est2	FBgn0015570	XLOC_010402	3R	FBtr0310421;FBtr0081540	11.4809	0.214286	0.572177	0.374511	0.708024	1
alpha-Est3	FBgn0015571	XLOC_012382	3R	FBtr0339708;FBtr0310527;FBtr0300496;FBtr0081545	222.352	0.0104429	0.28066	0.0372084	0.970319	0.992471
alpha-Est4	FBgn0015572	XLOC_012381	3R	FBtr0081546	167.108	0.0943056	0.314021	0.300317	0.763936	0.958213
alpha-Est4aPsi	FBgn0027934	XLOC_010400	3R	FBtr0090038	0.721762	-0.251635	0.334098	-0.753177	0.451343	1
alpha-Est5	FBgn0261393	XLOC_012380	3R	FBtr0307274;FBtr0081547	34.0701	-0.1464	0.457485	-0.320011	0.74896	0.955513
alpha-Est6	FBgn0015574	XLOC_012378	3R	FBtr0081549	8.02165	0.155685	0.60333	0.258042	0.796374	1
alpha-Est7	FBgn0015575	XLOC_012377	3R	FBtr0081550	13.7117	-0.333804	0.561482	-0.594505	0.552175	1
alpha-Est8	FBgn0015576	XLOC_012375	3R	FBtr0081553	14.803	-0.810882	0.585136	-1.3858	0.165808	1
alpha-Est9	FBgn0015577	XLOC_012373	3R	FBtr0302355;FBtr0302354	33.1346	-1.25888	0.478843	-2.62899	0.00856379	0.124653
alphagamma-element:CR32865	FBgn0052865	XLOC_012753	3R	FBtr0082678	1.67315	0.323756	0.500573	0.64677	0.517781	1
alphaKap4	FBgn0035657	XLOC_008923	3L	FBtr0077069	0.400979	-0.226108	0.3219	-0.702416	0.482419	1
alpha-Man-I	FBgn0259170	XLOC_016108	X	FBtr0300512;FBtr0300511;FBtr0299633;FBtr0300515;FBtr0300516;FBtr0300514;FBtr0300513;FBtr0331759;FBtr0299632	23.6745	-0.791982	0.510141	-1.55248	0.120548	0.538522
alpha-Man-Ib	FBgn0039634	XLOC_013885	3R	FBtr0085416	10.4068	0.797355	0.593073	1.34445	0.178804	1
alpha-Man-II	FBgn0011740	XLOC_010533	3R	FBtr0334302;FBtr0082031	32.7128	-0.10485	0.466631	-0.224697	0.822215	0.973053
alpha-Man-IIb	FBgn0026616	XLOC_010981	3R	FBtr0083179;FBtr0334593;FBtr0345238	10.711	0.000632508	0.594929	0.00106317	0.999152	1
alphaSnap	FBgn0250791	XLOC_008239	3L	FBtr0074840	37.8871	-0.238223	0.462744	-0.514805	0.60669	0.916574
alpha-Spec;dlt		XLOC_008641	3L	FBtr0332880;FBtr0332879;FBtr0072789;FBtr0332878;FBtr0072790	326.618	0.0241436	0.270588	0.0892266	0.928902	0.990566
alphaTry	FBgn0003863	XLOC_005593	2R	FBtr0088161	263.791	-0.477186	0.570178	-0.836907	0.402645	0.828449
alphaTub67C	FBgn0087040	XLOC_007512	3L	FBtr0076393	6.48727	0.730453	0.602109	1.21316	0.22507	1
alphaTub84B	FBgn0003884	XLOC_010361	3R	FBtr0081639	63.1445	-0.629286	0.399281	-1.57605	0.115015	0.528973
alphaTub84D	FBgn0003885	XLOC_010401	3R	FBtr0081538	6.12027	-0.306494	0.604446	-0.507066	0.612109	1
alphaTub85E	FBgn0003886	XLOC_012548	3R	FBtr0082087	1.03506	-0.0598375	0.391768	-0.152737	0.878605	1
Als2	FBgn0037116	XLOC_010058	3L	FBtr0078462	8.26165	-0.0607147	0.595005	-0.102041	0.918724	1
alt	FBgn0038535	XLOC_013119	3R	FBtr0335026;FBtr0335027;FBtr0089416;FBtr0089415;FBtr0089414;FBtr0089417;FBtr0089413;FBtr0089412	127.13	-0.337544	0.341378	-0.98877	0.322776	0.767225
amd	FBgn0000075	XLOC_001470	2L	FBtr0081153;FBtr0081154	1.74669	-0.758485	0.50498	-1.50201	0.133094	1
amn	FBgn0086782	XLOC_016708	X	FBtr0074802	728.664	0.479497	0.235113	2.03944	0.0414066	0.323346
Amnionless	FBgn0025686	XLOC_001786	2L	FBtr0078134;FBtr0330647	15.1573	1.60316	0.60227	2.66186		1
amon	FBgn0023179	XLOC_013747	3R	FBtr0085048	1.79932	0.166273	0.490981	0.338656	0.734869	1
amos	FBgn0003270	XLOC_003087	2L	FBtr0081081	1.27217	0.634618	0.465474	1.36338	0.172762	1
AMPdeam	FBgn0052626	XLOC_016302	X	FBtr0309245;FBtr0073833;FBtr0340445;FBtr0309246;FBtr0303292;FBtr0301046;FBtr0340444;FBtr0301045;FBtr0301044	59.3723	-0.203244	0.421619	-0.482056	0.629766	0.926258
Amph	FBgn0027356	XLOC_003992	2R	FBtr0333100;FBtr0333099;FBtr0087828	22.5992	0.42984	0.519231	0.827839	0.407761	0.832095
AMPKalpha	FBgn0023169	XLOC_014392	X	FBtr0070216;FBtr0070218;FBtr0070217	497.152	-0.748388	0.246588	-3.03497	0.00240561	0.0506381
Amun	FBgn0030328	XLOC_016188	X	FBtr0073619;FBtr0073615;FBtr0345164;FBtr0303336;FBtr0333796;FBtr0303337;FBtr0073618;FBtr0073617;FBtr0303339;FBtr0303338;FBtr0073616;FBtr0333797	32.2114	-0.480148	0.465701	-1.03102	0.302531	0.752615
amx	FBgn0000077	XLOC_016059	X	FBtr0307281;FBtr0071331	4.7973	-0.599395	0.593627	-1.00972	0.312631	1
Amy-d	FBgn0000078	XLOC_004353	2R	FBtr0086983	31.2673	-0.627012	0.462259	-1.35641	0.174969	0.628258
Amy-p	FBgn0000079	XLOC_006056	2R	FBtr0345521;FBtr0087004	129.24	-0.755686	0.40262	-1.87692	0.0605287	0.396735
Amyrel	FBgn0020506	XLOC_006015	2R	FBtr0087117	3.21532	-0.284135	0.581356	-0.488745	0.625022	1
ana	FBgn0011746	XLOC_003680	2R	FBtr0339284;FBtr0300501;FBtr0088559	1.59813	-0.223703	0.445384	-0.502269	0.615479	1
ana1	FBgn0262167	XLOC_011593	3R	FBtr0334335;FBtr0084645	42.7487	0.135204	0.467705	0.28908	0.77252	0.95983
ana2	FBgn0027513	XLOC_005397	2R	FBtr0339310;FBtr0088685	127.181	-0.176578	0.296714	-0.595112	0.551769	0.897035
ana3	FBgn0266111	XLOC_003950	2R	FBtr0087904	40.2442	0.188374	0.438725	0.429367	0.667656	0.935984
Ance	FBgn0012037	XLOC_001146	2L	FBtr0080552;FBtr0343667;FBtr0080553	66.3076	-0.459508	0.418729	-1.09739	0.272472	0.730762
Ance-2	FBgn0032535	XLOC_001147	2L	FBtr0080554	0.676123	0.0592407	0.342909	0.172759	0.862841	1
Ance-4	FBgn0033366	XLOC_005414	2R	FBtr0339288;FBtr0088664	2.01526	-0.12798	0.491172	-0.26056	0.794432	1
Ance-5	FBgn0035076	XLOC_006815	2R	FBtr0072420	36.3997	0.610358	0.470835	1.29633	0.194861	0.650291
Andorra	FBgn0030898	XLOC_016588	X	FBtr0074591	10.9044	0.432779	0.583784	0.741334	0.458491	1
angel	FBgn0016762	XLOC_004954	2R	FBtr0072083	15.0919	0.504245	0.548683	0.91901	0.35809	1
Ank	FBgn0011747	XLOC_014168	4	FBtr0300497;FBtr0089173;FBtr0089172;FBtr0089171	56.2452	0.610593	0.410126	1.4888	0.136541	0.565537
Ank2;CG44195		XLOC_009049	3L	FBtr0303117;FBtr0303122;FBtr0303125;FBtr0344224;FBtr0344222;FBtr0303123;FBtr0303121;FBtr0303114;FBtr0303113;FBtr0303112;FBtr0303111;FBtr0334060;FBtr0344223;FBtr0303124;FBtr0303115;FBtr0336853;FBtr0303118;FBtr0303119;FBtr0334061;FBtr0334062;FBtr0303120	193.438	-0.78042	0.276921	-2.8182	0.00482935	0.0831164
Anp	FBgn0000094	XLOC_012017	3R	FBtr0085611;FBtr0346141	0.664409	-0.289121	0.355308	-0.81372	0.415805	1
Ant2;sesB		XLOC_016135	X	FBtr0333963;FBtr0073425;FBtr0073426;FBtr0073424;FBtr0073423;FBtr0073422;FBtr0073421;FBtr0346384	418.877	-0.139554	0.24089	-0.579325	0.56237	0.899693
antdh	FBgn0026268	XLOC_016162	X	FBtr0073468	19.3289	0.113071	0.511857	0.220903	0.825168	0.973053
Antp	FBgn0260642	XLOC_012330	3R	FBtr0081653;FBtr0081656;FBtr0081652;FBtr0081648;FBtr0081650;FBtr0081651;FBtr0081649;FBtr0081647;FBtr0081655;FBtr0081654;FBtr0081646	4.02314	0.217925	0.594196	0.366756	0.713801	1
AnxB10	FBgn0000084	XLOC_016738	X	FBtr0301931;FBtr0070025	47.9006	-0.389442	0.425852	-0.914501	0.360454	0.797623
AnxB11	FBgn0030749	XLOC_016467	X	FBtr0334040;FBtr0334042;FBtr0334039;FBtr0334038;FBtr0334041;FBtr0074303;FBtr0074302	898.95	0.160036	0.226184	0.707548	0.479226	0.87011
AnxB9	FBgn0000083	XLOC_011338	3R	FBtr0336798;FBtr0089519;FBtr0089517;FBtr0089520;FBtr0089518;FBtr0336797	113.789	0.435241	0.335215	1.29839	0.194152	0.649109
aop	FBgn0000097	XLOC_001904	2L	FBtr0077851;FBtr0330658;FBtr0077850;FBtr0330659;FBtr0330660	67.1523	0.572269	0.381913	1.49843	0.134023	0.559743
aos	FBgn0004569	XLOC_009661	3L	FBtr0075408	22.4793	0.312552	0.493198	0.633725	0.526261	0.885144
Aos1	FBgn0029512	XLOC_012748	3R	FBtr0082593	97.1789	-0.625232	0.334104	-1.87137	0.0612936	0.398467
AOX1	FBgn0267408	XLOC_012976	3R	FBtr0083154	226.568	-0.27753	0.271157	-1.02351	0.306069	0.756259
AOX2	FBgn0038348	XLOC_012977	3R	FBtr0345258	24.1026	-1.15388	0.514048	-2.2447	0.0247871	0.244432
AOX3	FBgn0038349	XLOC_012978	3R	FBtr0083151	41.6063	-0.204276	0.437212	-0.467224	0.64034	0.928556
AOX4	FBgn0038350	XLOC_012979	3R	FBtr0083150	13.6763	0.00683553	0.548008	0.0124734	0.990048	1
ap	FBgn0000099	XLOC_005154	2R	FBtr0086059;FBtr0086058;FBtr0300504;FBtr0335274	9.80799	-0.838462	0.583364	-1.43729	0.150636	1
AP-1-2beta	FBgn0010380	XLOC_015429	X	FBtr0074789	17.5698	0.157594	0.549146	0.28698	0.774128	1
AP-1gamma	FBgn0030089	XLOC_014807	X	FBtr0071296;FBtr0071294;FBtr0112965;FBtr0071298;FBtr0071297;FBtr0071295;FBtr0333808;FBtr0309255;FBtr0309254	56.1147	0.0451671	0.380726	0.118634	0.905565	0.986541
AP-1mu	FBgn0024833	XLOC_012526	3R	FBtr0082114	132.107	-0.0626398	0.344033	-0.182075	0.855524	0.978203
AP-1sigma	FBgn0039132	XLOC_011535	3R	FBtr0335244;FBtr0305040;FBtr0305039;FBtr0084496	4.74602	-0.450095	0.599206	-0.751153	0.452561	1
AP-2alpha	FBgn0264855	XLOC_001795	2L	FBtr0089488;FBtr0089489	14.5767	0.0933425	0.564354	0.165397	0.868632	1
AP-2mu	FBgn0263351	XLOC_011439	3R	FBtr0301866;FBtr0084253;FBtr0084252	15.8204	-1.07597	0.537808	-2.00066	0.045429	1
AP-2sigma	FBgn0043012	XLOC_013338	3R	FBtr0084103	4.10586	-0.412369	0.569222	-0.724444	0.468793	1
Apc	FBgn0015589	XLOC_013871	3R	FBtr0336767;FBtr0085351	54.3816	-0.272407	0.405092	-0.672457	0.501293	0.881383
APC10	FBgn0034231	XLOC_006089	2R	FBtr0086951	32.0642	-0.120369	0.463253	-0.259834	0.794992	0.962609
Apc2	FBgn0026598	XLOC_011557	3R	FBtr0084552	123.869	-0.471282	0.336083	-1.40228	0.160832	0.611027
APC4	FBgn0052707	XLOC_014800	X	FBtr0071285;FBtr0309872	2.7351	0.370659	0.519843	0.713022	0.475832	1
APC7	FBgn0029879	XLOC_014661	X	FBtr0070946;FBtr0070947	22.0421	0.467334	0.507501	0.920852	0.357128	0.795204
ApepP	FBgn0026150	XLOC_003003	2L	FBtr0304931;FBtr0080956	111.799	-0.206922	0.309203	-0.669212	0.50336	0.881488
Apf	FBgn0051713	XLOC_002516	2L	FBtr0079895	7.47849	-0.61454	0.60545	-1.01501	0.3101	1
aph-1	FBgn0031458	XLOC_000260	2L	FBtr0077716;FBtr0335127	2.25781	0.661907	0.535427	1.23622	0.216376	1
Aph-4	FBgn0016123	XLOC_012069	3R	FBtr0085733;FBtr0085734	101.668	0.357514	0.346256	1.03251	0.301832	0.752243
aPKC	FBgn0261854	XLOC_005886	2R	FBtr0303434;FBtr0329890;FBtr0329889;FBtr0329888;FBtr0329887;FBtr0303431;FBtr0303437;FBtr0303432;FBtr0303429;FBtr0303435;FBtr0303430	16.4265	-0.547296	0.545986	-1.0024	0.316151	1
Aplip1	FBgn0040281	XLOC_006913	3L	FBtr0072627;FBtr0072626	0.412693	0.246714	0.322651	0.764646	0.444482	1
Apoltp	FBgn0032136	XLOC_000801	2L	FBtr0303874	51.0895	-0.782183	0.428564	-1.82513	0.0679818	0.419937
app	FBgn0260941	XLOC_009378	3L	FBtr0334103;FBtr0334102;FBtr0339925;FBtr0304661;FBtr0301057;FBtr0301056;FBtr0301055;FBtr0301054;FBtr0301053;FBtr0301052	18.1546	-0.737182	0.559847	-1.31676	0.18792	1
Appl	FBgn0000108	XLOC_014336	X	FBtr0307293;FBtr0307295;FBtr0307292;FBtr0070109;FBtr0307294;FBtr0307291	233.663	0.709986	0.300037	2.36633	0.0179655	0.202677
Aprt	FBgn0000109	XLOC_008652	3L	FBtr0346440;FBtr0089420;FBtr0346441	3.45722	0.476749	0.566876	0.841011	0.400342	1
Aps	FBgn0036111	XLOC_009254	3L	FBtr0076250;FBtr0076252;FBtr0076251	41.3847	0.41088	0.457894	0.897326	0.369545	0.804298
apt	FBgn0015903	XLOC_004947	2R	FBtr0072068;FBtr0072067;FBtr0072066;FBtr0072069;FBtr0072070;FBtr0332926	24.63	-0.27184	0.487926	-0.557133	0.577437	0.906148
AQP	FBgn0033807	XLOC_005748	2R	FBtr0087766;FBtr0300286	1.17419	-0.0647225	0.401562	-0.161177	0.871954	1
aqrs	FBgn0039598	XLOC_013867	3R	FBtr0085313	0.664409	-0.289121	0.355308	-0.81372	0.415805	1
ara	FBgn0015904	XLOC_007723	3L	FBtr0300551;FBtr0075908	2.18948	0.115418	0.52648	0.219225	0.826475	1
aralar1	FBgn0028646	XLOC_014007	3R	FBtr0085694;FBtr0085693;FBtr0306586;FBtr0085692;FBtr0085695	15.6252	-0.178219	0.552872	-0.322351	0.747187	1
Arc1	FBgn0033926	XLOC_005836	2R	FBtr0087560	372.705	-0.312249	0.237098	-1.31696	0.187852	0.64175
Arc2	FBgn0033928	XLOC_004115	2R	FBtr0087547	3.62216	0.310494	0.567151	0.547462	0.584061	1
Arc42	FBgn0038742	XLOC_011263	3R	FBtr0083817	5.32632	-0.0297061	0.59441	-0.0499758	0.960142	1
aret	FBgn0000114	XLOC_001035	2L	FBtr0331998;FBtr0331648;FBtr0331646;FBtr0080344;FBtr0331645;FBtr0331647;FBtr0300567;FBtr0080345;FBtr0331644;FBtr0080347	15.5912	0.600933	0.544388	1.10387	0.269649	1
Arf102F	FBgn0013749	XLOC_014155	4	FBtr0333699;FBtr0089192	8.00637	0.513139	0.597959	0.858151	0.390809	1
Arf51F	FBgn0013750	XLOC_004194	2R	FBtr0087378;FBtr0087377;FBtr0087376;FBtr0087375;FBtr0087379	9.75983	0.510758	0.596696	0.855976	0.392011	1
Arf79F	FBgn0010348	XLOC_010120	3L	FBtr0299906;FBtr0078575;FBtr0078574;FBtr0332054;FBtr0078573;FBtr0112858;FBtr0078571;FBtr0299907	71.8207	-0.569471	0.348927	-1.63206	0.102666	0.499016
ArfGAP1	FBgn0020655	XLOC_009390	3L	FBtr0332088;FBtr0075981	15.0324	-0.0856088	0.546078	-0.15677	0.875426	1
ArfGAP3	FBgn0037182	XLOC_010109	3L	FBtr0078539;FBtr0330175;FBtr0331775;FBtr0330174;FBtr0330173;FBtr0078540;FBtr0113186	15.4517	0.485497	0.553772	0.87671	0.380644	1
Arfip	FBgn0037884	XLOC_012657	3R	FBtr0082364	26.7809	-1.08833	0.513571	-2.11915	0.034078	0.29142
Arfrp1	FBgn0030088	XLOC_014806	X	FBtr0071293	38.6775	-0.40782	0.44675	-0.912859	0.361316	0.798661
arg	FBgn0023535	XLOC_014335	X	FBtr0070088	18.8114	-0.0979911	0.532974	-0.183857	0.854126	0.978056
Argk	FBgn0000116	XLOC_009151	3L	FBtr0345030;FBtr0076546;FBtr0076544;FBtr0331550;FBtr0076545;FBtr0112791;FBtr0076543	208.801	-0.936546	0.329088	-2.84588	0.00442883	0.0779279
ari-1	FBgn0017418	XLOC_016587	X	FBtr0306057;FBtr0332851;FBtr0332850;FBtr0089507;FBtr0089508;FBtr0089506	50.8249	-0.388613	0.43228	-0.898984	0.368661	0.803345
ari-2	FBgn0025186	XLOC_004830	2R	FBtr0071774	10.8616	-0.154224	0.596256	-0.258653	0.795903	1
Arl1	FBgn0000115	XLOC_007928	3L	FBtr0075517	11.0733	-0.541886	0.597406	-0.907065	0.364372	1
Arl2	FBgn0004908	XLOC_010459	3R	FBtr0081838	26.3811	-0.216982	0.531278	-0.408415	0.682969	0.939361
Arl4	FBgn0039889	XLOC_014172	4	FBtr0308248;FBtr0333677;FBtr0089153	12.9334	0.353358	0.596207	0.592677	0.553398	1
Arl6	FBgn0034446	XLOC_004592	2R	FBtr0340534;FBtr0086534	19.8338	0.55643	0.509031	1.09312	0.274342	0.731743
arm	FBgn0000117	XLOC_015644	X	FBtr0332583;FBtr0089988;FBtr0089990;FBtr0089989;FBtr0089991;FBtr0089992	44.6565	-0.310448	0.422812	-0.734246	0.462799	0.86153
armi	FBgn0041164	XLOC_007099	3L	FBtr0309841;FBtr0100641;FBtr0309840	2.76938	0.193522	0.548304	0.352947	0.724128	1
Arp1	FBgn0011745	XLOC_010789	3R	FBtr0082652	9.2437	0.0536669	0.604848	0.0887279	0.929298	1
Arp10	FBgn0031050	XLOC_016688	X	FBtr0074760;FBtr0345991	23.2324	-0.193669	0.53975	-0.358812	0.719736	0.947509
Arp2	FBgn0011742	XLOC_016475	X	FBtr0112868;FBtr0310673;FBtr0074295	37.5264	-0.421185	0.442021	-0.952861	0.34066	0.779804
Arp3	FBgn0262716	XLOC_009076	3L	FBtr0076737;FBtr0334087	42.2029	0.379745	0.417531	0.909501	0.363086	0.799241
Arp5	FBgn0038576	XLOC_011160	3R	FBtr0083557;FBtr0336468	78.4978	-1.0662	0.357642	-2.98119	0.00287129	0.0566679
Arp6	FBgn0011741	XLOC_016416	X	FBtr0074203	27.244	-0.618378	0.520139	-1.18887	0.23449	0.688293
Arp8	FBgn0030877	XLOC_016575	X	FBtr0074544	31.2494	0.305781	0.465471	0.656928	0.511227	0.885038
Arpc1	FBgn0001961	XLOC_002802	2L	FBtr0080570;FBtr0080569	11.73	-0.365061	0.58938	-0.619397	0.535655	1
Arpc2	FBgn0032859	XLOC_001541	2L	FBtr0346418;FBtr0081358	22.0458	-0.062968	0.498747	-0.126252	0.899532	0.986351
Arpc3A	FBgn0038369	XLOC_010983	3R	FBtr0300570;FBtr0334594	125.395	-0.366255	0.31185	-1.17446	0.240211	0.693307
Arpc3B	FBgn0065032	XLOC_016519	X	FBtr0113478;FBtr0334462;FBtr0074410	15.6686	-1.38013	0.55546	-2.48467	0.0129673	1
Arpc4	FBgn0031781	XLOC_000539	2L	FBtr0079200	17.4429	-1.10395	0.544483	-2.02752	0.0426093	1
Arpc5	FBgn0031437	XLOC_000243	2L	FBtr0077694;FBtr0335170	57.7354	-0.0232314	0.413834	-0.056137	0.955233	0.99154
arr	FBgn0000119	XLOC_005777	2R	FBtr0087702	8.16684	0.294123	0.599975	0.490226	0.623974	1
Arr1	FBgn0000120	XLOC_001394	2L	FBtr0081030;FBtr0307350;FBtr0340229	1.17863	-0.0995171	0.397476	-0.250373	0.802299	1
Arr2	FBgn0000121	XLOC_009124	3L	FBtr0076599	1.16456	0.509203	0.431512	1.18004	0.237983	1
Ars2	FBgn0033062	XLOC_005173	2R	FBtr0086020;FBtr0310667;FBtr0310666;FBtr0310665;FBtr0086018;FBtr0086021	19.2438	0.038063	0.54133	0.0703137	0.943944	0.991392
Art1	FBgn0037834	XLOC_012622	3R	FBtr0082304	11.6704	-0.0979688	0.583665	-0.167851	0.866701	1
Art3	FBgn0038306	XLOC_012946	3R	FBtr0083135;FBtr0083134	0.985643	0.165032	0.389834	0.423338	0.672048	1
Art4	FBgn0037770	XLOC_012571	3R	FBtr0333687;FBtr0082150	325.747	0.488482	0.23591	2.07063	0.0383937	0.308559
Art7	FBgn0034817	XLOC_006629	2R	FBtr0114564	4.16681	-0.426589	0.593137	-0.719209	0.472012	1
Art8	FBgn0032329	XLOC_002628	2L	FBtr0080162	50.9166	0.438791	0.427664	1.02602	0.304883	0.755034
aru	FBgn0029095	XLOC_001822	2L	FBtr0078033;FBtr0078032;FBtr0078031	20.5916	-0.0943237	0.504187	-0.187081	0.851597	0.977916
arx	FBgn0036826	XLOC_009823	3L	FBtr0075075	7.39999	0.403597	0.604473	0.667683	0.504336	1
Asap	FBgn0050372	XLOC_005335	2R	FBtr0339300;FBtr0300954;FBtr0100140	65.742	0.39376	0.375234	1.04937	0.294008	0.750688
Asator	FBgn0039908	XLOC_014185	4	FBtr0332906;FBtr0300342;FBtr0332905;FBtr0300344;FBtr0332904;FBtr0300343;FBtr0332908;FBtr0332907;FBtr0344869	387.718	0.0643395	0.258577	0.248821	0.803499	0.965784
Asciz	FBgn0035407	XLOC_008723	3L	FBtr0073112;FBtr0329990	84.5509	0.0833111	0.334139	0.249331	0.803105	0.965784
ase	FBgn0000137	XLOC_014328	X	FBtr0070075	3.54833	-0.075765	0.559791	-0.135345	0.892339	1
asf1	FBgn0029094	XLOC_008192	3L	FBtr0074947	12.0536	-0.312279	0.582665	-0.53595	0.591993	1
ash1	FBgn0005386	XLOC_009879	3L	FBtr0306010;FBtr0306009	8.24116	-0.4123	0.601382	-0.685588	0.492973	1
ash2	FBgn0000139	XLOC_011603	3R	FBtr0084660;FBtr0306171;FBtr0084659	3.71818	0.668024	0.559774	1.19338	0.23272	1
asl	FBgn0261004	XLOC_012244	3R	FBtr0078743	1.99504	-0.451608	0.506022	-0.892467	0.372143	1
asp	FBgn0000140	XLOC_011613	3R	FBtr0084692	21.9248	0.240084	0.494752	0.485262	0.627491	0.925676
asparagine-synthetase	FBgn0041607	XLOC_008311	3L	FBtr0089463	8.63651	-1.03251	0.604691	-1.7075	0.0877288	1
Asph	FBgn0034075	XLOC_004244	2R	FBtr0336734;FBtr0305090;FBtr0305092;FBtr0310447;FBtr0305091;FBtr0300575;FBtr0087220;FBtr0087219	96.3685	-0.306446	0.605437	-0.506157	0.612747	0.919003
ASPP	FBgn0034606	XLOC_006466	2R	FBtr0071623;FBtr0071622;FBtr0330232	10.9557	-0.240561	0.590899	-0.40711	0.683927	1
asrij	FBgn0034793	XLOC_004898	2R	FBtr0071902;FBtr0332909	5.29181	-0.791154	0.581583	-1.36034	0.173721	1
ast	FBgn0015905	XLOC_000137	2L	FBtr0077952	11.9355	0.798783	0.581308	1.37411	0.169406	1
AstA	FBgn0015591	XLOC_013596	3R	FBtr0084744;FBtr0346367	1.38662	0.0298716	0.462188	0.0646308	0.948468	1
AstA-R1	FBgn0266429	XLOC_014504	X	FBtr0333798;FBtr0070575	26.5484	-0.738687	0.554486	-1.3322	0.182794	0.636307
AstA-R2	FBgn0039595	XLOC_013864	3R	FBtr0085316;FBtr0336790;FBtr0308641	2.43784	0.209218	0.535553	0.390657	0.696051	1
AstC	FBgn0032336	XLOC_002632	2L	FBtr0301761;FBtr0080234	3.41021	0.168184	0.584478	0.28775	0.773538	1
AstCC	FBgn0032337	XLOC_002633	2L	FBtr0343623;FBtr0114455	4.08882	1.13111	0.583765	1.93761	0.0526705	1
AstC-R1	FBgn0036790	XLOC_008111	3L	FBtr0089578	0.761496	-0.246955	0.332224	-0.743339	0.457276	1
AstC-R2	FBgn0036789	XLOC_009801	3L	FBtr0332867;FBtr0089387	2.1286	0.0532194	0.510026	0.104346	0.916894	1
asun	FBgn0020407	XLOC_011017	3R	FBtr0083259	2.04925	0.824216	0.505172	1.63155	0.102773	1
Asx	FBgn0261823	XLOC_004132	2R	FBtr0332930;FBtr0087493;FBtr0332929;FBtr0100154	26.87	0.0313587	0.486513	0.064456	0.948607	0.99154
Atac1	FBgn0031876	XLOC_002301	2L	FBtr0079362	0.442345	0.244242	0.321051	0.760758	0.446802	1
Atac2	FBgn0032691	XLOC_003089	2L	FBtr0081079	3.61585	-0.979689	0.578915	-1.69228	0.0905918	1
Atac3	FBgn0052343	XLOC_008529	3L	FBtr0332840;FBtr0299838;FBtr0309236;FBtr0299831	5.65819	-0.150849	0.60546	-0.249147	0.803247	1
ATbp	FBgn0039946	XLOC_015538	X	FBtr0301978	1.16248	-0.438429	0.41883	-1.04679	0.295194	1
Ate1	FBgn0025720	XLOC_006376	2R	FBtr0086319;FBtr0336634;FBtr0086318;FBtr0086317	10.1812	0.166106	0.578903	0.286932	0.774164	1
Atet	FBgn0020762	XLOC_000384	2L	FBtr0077427;FBtr0077426;FBtr0112899;FBtr0112898	7.99681	-0.91718	0.600681	-1.5269	0.126786	1
Atf-2	FBgn0265193	XLOC_005090	2R	FBtr0339096	30.0417	0.457583	0.523576	0.873956	0.382142	0.812219
Atf3	FBgn0028550	XLOC_015609	X	FBtr0345507;FBtr0330391	117.839	-0.895683	0.358785	-2.49643	0.012545	0.162603
Atf6	FBgn0033010	XLOC_003418	2R	FBtr0086081;FBtr0086079;FBtr0086080	12.6238	0.00405008	0.58745	0.00689434	0.994499	1
Atg1	FBgn0260945	XLOC_009414	3L	FBtr0075945;FBtr0300561	24.245	-0.0651786	0.514413	-0.126705	0.899174	0.986351
Atg101	FBgn0030960	XLOC_015364	X	FBtr0074635	4.91199	-0.212918	0.596169	-0.357144	0.720984	1
Atg12	FBgn0036255	XLOC_007693	3L	FBtr0300011	28.4166	-0.0458799	0.49099	-0.0934437	0.925551	0.990386
Atg13	FBgn0261108	XLOC_010463	3R	FBtr0081843	45.1915	0.00275384	0.415348	0.0066302	0.99471	0.997486
Atg14	FBgn0039636	XLOC_011934	3R	FBtr0085370	12.8881	0.48864	0.573373	0.852221	0.394092	1
Atg16	FBgn0039705	XLOC_013937	3R	FBtr0085530;FBtr0085529;FBtr0339144;FBtr0085528	7.22486	0.762246	0.603354	1.26335	0.206464	1
Atg17	FBgn0037363	XLOC_010257	3R	FBtr0334946;FBtr0078716	28.1413	-0.143353	0.468316	-0.306103	0.759526	0.95812
Atg18a	FBgn0035850	XLOC_007382	3L	FBtr0346547;FBtr0321321;FBtr0321319;FBtr0076692;FBtr0076691;FBtr0321320;FBtr0076693	8.09663	-1.2658	0.601016	-2.10609	0.0351962	1
Atg18b	FBgn0032935	XLOC_003290	2L	FBtr0331678;FBtr0081487	10.9606	0.0590186	0.573468	0.102915	0.91803	1
Atg2	FBgn0044452	XLOC_007036	3L	FBtr0333441;FBtr0072970	101.545	-1.02551	0.344118	-2.98011	0.00288148	0.0566679
Atg3	FBgn0036813	XLOC_008133	3L	FBtr0075055	24.4542	-0.269152	0.490393	-0.54885	0.583108	0.906836
Atg4a	FBgn0031298	XLOC_000138	2L	FBtr0077953;FBtr0332569	1316.53	0.526783	0.24339	2.16436	0.0304367	0.277172
Atg4b	FBgn0038325	XLOC_012962	3R	FBtr0083115	15.5199	0.845003	0.543819	1.55383	0.120225	1
Atg5	FBgn0029943	XLOC_015937	X	FBtr0071065	60.9861	0.151155	0.514636	0.293711	0.768979	0.959698
Atg6	FBgn0264325	XLOC_013542	3R	FBtr0084590	3.88987	-0.245154	0.59265	-0.413657	0.679125	1
Atg7	FBgn0034366	XLOC_006172	2R	FBtr0086712;FBtr0086711	57.7084	0.160656	0.368401	0.436089	0.662772	0.933856
Atg8a	FBgn0052672	XLOC_016134	X	FBtr0346376;FBtr0346375;FBtr0071498	100.166	-0.0749212	0.337926	-0.221709	0.824541	0.973053
Atg8b	FBgn0038539	XLOC_013123	3R	FBtr0346730;FBtr0083533	0.442345	0.244242	0.321051	0.760758	0.446802	1
Atg9	FBgn0034110	XLOC_004271	2R	FBtr0329958	6.24174	0.520681	0.603705	0.862476	0.388426	1
atilla	FBgn0032422	XLOC_002711	2L	FBtr0331999;FBtr0273342	4.46796	0.307642	0.598513	0.514011	0.607244	1
atk;CG42764		XLOC_009962	3L	FBtr0331569;FBtr0078223;FBtr0331570;FBtr0331568;FBtr0303392;FBtr0303393	40.6062	0.470708	0.453	1.03909	0.298763	0.750688
atl	FBgn0039213	XLOC_011602	3R	FBtr0084656;FBtr0084657;FBtr0345218	44.7783	-0.234229	0.436811	-0.536224	0.591804	0.908284
atms	FBgn0010750	XLOC_010202	3R	FBtr0334899;FBtr0078868	102.919	1.24109	0.347482	3.57168	0.000354701	0.0120484
ato	FBgn0010433	XLOC_010448	3R	FBtr0081828	1.29738	0.558478	0.445868	1.25257	0.210364	1
Atox1	FBgn0052446	XLOC_008361	3L	FBtr0078426	6.96889	-0.540459	0.601126	-0.899077	0.368611	1
ATP7	FBgn0030343	XLOC_014969	X	FBtr0273257;FBtr0334454	58.6091	0.0286162	0.379409	0.0754232	0.939878	0.991392
ATP8B	FBgn0037989	XLOC_012717	3R	FBtr0307016;FBtr0300351;FBtr0339646;FBtr0339645;FBtr0339644;FBtr0339643;FBtr0307015	13.1804	0.624639	0.586462	1.0651	0.286832	1
Atpalpha	FBgn0002921	XLOC_011333	3R	FBtr0333324;FBtr0333325;FBtr0089510;FBtr0089515;FBtr0300191;FBtr0089514;FBtr0089509;FBtr0089511;FBtr0089516;FBtr0089513;FBtr0089512	174.131	0.527854	0.307981	1.71392	0.0865443	0.459415
ATPCL	FBgn0020236	XLOC_005956	2R	FBtr0300597;FBtr0340016;FBtr0300598;FBtr0300596	87.9107	-0.658504	0.363546	-1.81133	0.070089	0.424333
ATPsyn-b	FBgn0019644	XLOC_007522	3L	FBtr0076405	67.0926	-0.628511	0.361972	-1.73635	0.0825017	0.453345
ATPsyn-beta	FBgn0010217	XLOC_014152	4	FBtr0333672;FBtr0089186;FBtr0344754	162.638	-0.461482	0.344155	-1.34091	0.179949	0.634167
ATPsyn-Cf6	FBgn0016119	XLOC_013481	3R	FBtr0333777;FBtr0305982;FBtr0084432	1.77816	-0.535066	0.447121	-1.19669		1
ATPsyn-d	FBgn0016120	XLOC_011216	3R	FBtr0083728;FBtr0083727;FBtr0346155	17.6604	-0.33817	0.529782	-0.638319	0.523266	1
ATPsyn-gamma	FBgn0020235	XLOC_013928	3R	FBtr0085541;FBtr0085539;FBtr0085540	19.8216	-0.005616	0.538438	-0.0104302	0.991678	0.997315
AttA	FBgn0012042	XLOC_004156	2R	FBtr0087437	4.66449	0.141857	0.592492	0.239424	0.810777	1
AttB	FBgn0041581	XLOC_004157	2R	FBtr0087438;FBtr0300942	48.134	-0.792123	0.418881	-1.89104	0.0586184	0.391127
AttC	FBgn0041579	XLOC_004045	2R	FBtr0305795	1.52299	-0.438126	0.417053	-1.05053	0.293476	1
AttD	FBgn0038530	XLOC_011123	3R	FBtr0083470	2.61625	-0.240474	0.533741	-0.450544	0.652318	1
att-ORFA;att-ORFB		XLOC_013275	3R	FBtr0344280;FBtr0344282;FBtr0089482;FBtr0089481;FBtr0344281;FBtr0089480	11.1406	-0.12507	0.585312	-0.213681	0.830796	1
Atu	FBgn0019637	XLOC_010246	3R	FBtr0078704	30.7735	-0.227087	0.48339	-0.469781	0.638512	0.928057
Atx-1	FBgn0029907	XLOC_014679	X	FBtr0299814	1.03506	-0.0598375	0.391768	-0.152737	0.878605	1
Atx2	FBgn0041188	XLOC_010956	3R	FBtr0083099;FBtr0083101;FBtr0083100;FBtr0344377	62.2995	-0.0223806	0.453836	-0.0493143	0.960669	0.992471
Atxn7	FBgn0031420	XLOC_000231	2L	FBtr0331438;FBtr0077765;FBtr0077766;FBtr0331437	8.95122	-0.659989	0.596749	-1.10598	0.268737	1
aub	FBgn0000146	XLOC_002626	2L	FBtr0112793;FBtr0080165	5.81733	0.253066	0.605201	0.418152	0.675836	1
aurA	FBgn0000147	XLOC_010714	3R	FBtr0082483	28.6295	-0.0344284	0.46892	-0.0734207	0.941471	0.991392
aust	FBgn0032104	XLOC_002469	2L	FBtr0343928;FBtr0079819	4.13425	0.423474	0.594215	0.712661	0.476055	1
aux	FBgn0037218	XLOC_010160	3R	FBtr0078965;FBtr0336706;FBtr0336705;FBtr0078966	127.336	0.438099	0.316811	1.38284	0.166713	0.622814
ave	FBgn0050476	XLOC_004158	2R	FBtr0087439	3.68282	-0.241861	0.541394	-0.446738	0.655064	1
Aven	FBgn0030410	XLOC_016240	X	FBtr0073709;FBtr0346122	0.442345	0.244242	0.321051	0.760758	0.446802	1
awd	FBgn0000150	XLOC_014088	3R	FBtr0346611;FBtr0339146;FBtr0346150	39.7361	-0.3559	0.482334	-0.73787	0.460593	0.860644
Awh	FBgn0013751	XLOC_007117	3L	FBtr0330071;FBtr0330070;FBtr0073155	0.88469	0.318139	0.360214	0.883193	0.377132	1
Axn	FBgn0026597	XLOC_012002	3R	FBtr0085554;FBtr0334702;FBtr0290030;FBtr0085553;FBtr0334703;FBtr0300600;FBtr0085555	9.31506	-0.958956	0.595924	-1.60919	0.107575	1
axo	FBgn0262870	XLOC_008840	3L	FBtr0306206;FBtr0333594;FBtr0333592;FBtr0302646;FBtr0333591;FBtr0306207;FBtr0333593	43.6911	-0.176802	0.406259	-0.435196	0.66342	0.933856
Axs	FBgn0000152	XLOC_016488	X	FBtr0074372	8.2523	-0.434008	0.595907	-0.728315	0.466421	1
Axud1	FBgn0261647	XLOC_000229	2L	FBtr0330665;FBtr0077763;FBtr0077762;FBtr0330666	19.6027	0.25015	0.513232	0.487403	0.625973	0.924184
az2	FBgn0025185	XLOC_005274	2R	FBtr0088980	3.09505	-0.325743	0.530187	-0.614393	0.538955	1
b	FBgn0000153	XLOC_001139	2L	FBtr0342712;FBtr0309960	10.0624	0.724517	0.587313	1.23361	0.217347	1
B4	FBgn0023407	XLOC_002787	2L	FBtr0332509;FBtr0080514;FBtr0080513	54.7684	-0.0175917	0.407742	-0.0431441	0.965587	0.992471
B52	FBgn0004587	XLOC_010848	3R	FBtr0082803;FBtr0300588;FBtr0308196;FBtr0308197;FBtr0308195;FBtr0300586;FBtr0082802;FBtr0082801;FBtr0082806;FBtr0082804	26.7698	0.0387961	0.488097	0.0794844	0.936647	0.991392
b6	FBgn0024897	XLOC_014407	X	FBtr0070272	11.4039	0.266168	0.576468	0.461722	0.64428	1
bab1	FBgn0004870	XLOC_008578	3L	FBtr0333269;FBtr0333270;FBtr0333268;FBtr0072642	72.7385	-0.294821	0.360699	-0.81736	0.413723	0.834106
bab2	FBgn0025525	XLOC_008579	3L	FBtr0333271;FBtr0072639	56.4042	0.170382	0.409851	0.415717	0.677617	0.938648
babo	FBgn0011300	XLOC_003678	2R	FBtr0300599;FBtr0088659;FBtr0088658	7.65234	-0.776139	0.602396	-1.28842	0.197599	1
babos	FBgn0034724	XLOC_006570	2R	FBtr0339539;FBtr0071845	296.928	0.0029088	0.270106	0.0107691	0.991408	0.997315
Bacc	FBgn0031453	XLOC_000258	2L	FBtr0335125;FBtr0077713;FBtr0307080;FBtr0077714	124.309	-0.40432	0.309572	-1.30606	0.191532	0.644682
Bace	FBgn0032049	XLOC_002432	2L	FBtr0343427;FBtr0079701	205.175	-0.818048	0.281329	-2.9078	0.00363986	0.0675287
baf	FBgn0031977	XLOC_000663	2L	FBtr0079535;FBtr0333095	6.69184	-0.425308	0.603649	-0.704562	0.481083	1
bai	FBgn0045866	XLOC_011643	3R	FBtr0084758	11.0827	0.654722	0.57294	1.14274	0.253146	1
Baldspot	FBgn0260960	XLOC_009678	3L	FBtr0075355;FBtr0075356	66.3511	-0.632593	0.39818	-1.58871	0.112125	0.523124
ball	FBgn0027889	XLOC_013755	3R	FBtr0085096;FBtr0085095	4.78683	0.028387	0.571348	0.0496842	0.960374	1
bam	FBgn0000158	XLOC_013641	3R	FBtr0084869	58.4306	-0.180348	0.416628	-0.432874	0.665106	0.934794
bap	FBgn0004862	XLOC_011364	3R	FBtr0084087	0.400979	-0.226108	0.3219	-0.702416	0.482419	1
Bap170	FBgn0042085	XLOC_003471	2R	FBtr0086107	24.9578	1.53174	0.506102	3.02655	0.00247365	0.0514765
Bap55	FBgn0025716	XLOC_006081	2R	FBtr0086960	17.6013	0.735535	0.526133	1.398	0.162113	1
Bap60	FBgn0025463	XLOC_016263	X	FBtr0073741	14.3618	0.366102	0.548147	0.66789	0.504204	1
barc	FBgn0037081	XLOC_010034	3L	FBtr0078400;FBtr0078399	372.27	0.0966014	0.239276	0.403723	0.686416	0.939361
barr	FBgn0014127	XLOC_003207	2L	FBtr0081349;FBtr0081348;FBtr0343850	2.52024	0.180131	0.515497	0.349431	0.726766	1
baz	FBgn0000163	XLOC_015284	X	FBtr0343763;FBtr0343764;FBtr0111000;FBtr0074388	59.5146	-0.571812	0.417219	-1.37053	0.170522	0.626352
bbc	FBgn0033844	XLOC_005779	2R	FBtr0305993;FBtr0087699;FBtr0332928;FBtr0087700	60.2971	-0.101891	0.394327	-0.258391	0.796105	0.963317
bbg	FBgn0087007	XLOC_009508	3L	FBtr0273425;FBtr0273424;FBtr0273428;FBtr0273426;FBtr0273423;FBtr0273427;FBtr0308596;FBtr0273422	98.3347	-0.711803	0.327925	-2.17063	0.0299593	0.275796
BBS1	FBgn0035741	XLOC_007312	3L	FBtr0076912	3.55146	-1.07244	0.548534	-1.95509		1
BBS4	FBgn0033578	XLOC_003839	2R	FBtr0339487;FBtr0088202	2.42169	-0.0331713	0.54775	-0.0605593	0.95171	1
BBS8	FBgn0031255	XLOC_000089	2L	FBtr0078058	1.16411	-0.0971716	0.404718	-0.240097	0.810255	1
bc10	FBgn0040239	XLOC_007223	3L	FBtr0077084	6.28486	0.899389	0.604381	1.48812	0.13672	1
BCAS2	FBgn0039558	XLOC_013830	3R	FBtr0085269	3.24245	0.363025	0.540825	0.671243	0.502066	1
bcd	FBgn0000166	XLOC_012315	3R	FBtr0081666;FBtr0081668;FBtr0081667;FBtr0081665;FBtr0081664	9.56967	0.652168	0.584341	1.11607	0.26439	1
bchs	FBgn0043362	XLOC_000511	2L	FBtr0079144	246.323	0.232781	0.273479	0.851183	0.394668	0.822576
BCL7-like	FBgn0026149	XLOC_014831	X	FBtr0071358	36.0041	0.417095	0.430277	0.969364	0.332364	0.773725
bcn92	FBgn0013432	XLOC_015663	X	FBtr0070431	193.01	-0.427184	0.309626	-1.37968	0.167686	0.623468
Bdbt	FBgn0038857	XLOC_013327	3R	FBtr0084033	16.3861	0.505071	0.548792	0.920332	0.357399	1
bdg	FBgn0034049	XLOC_005949	2R	FBtr0087299;FBtr0340017;FBtr0087300;FBtr0087298	30.7143	-0.655904	0.471158	-1.39211	0.163888	0.618363
be	FBgn0052594	XLOC_015133	X	FBtr0310270;FBtr0073957;FBtr0073956	2186.3	-0.70499	0.245265	-2.8744	0.00404796	0.0724003
BEAF-32	FBgn0015602	XLOC_004160	2R	FBtr0087441;FBtr0305588;FBtr0087442	29.5935	-0.0456029	0.47656	-0.0956919	0.923765	0.990356
beag	FBgn0037660	XLOC_012495	3R	FBtr0081995	38.4101	0.861732	0.461318	1.86798	0.0617649	0.399574
beat-Ia	FBgn0013433	XLOC_001280	2L	FBtr0343728;FBtr0080806	0.26343	-0.205717	0.311207	-0.661028	0.508594	1
beat-Ic	FBgn0028644	XLOC_001275	2L	FBtr0343726;FBtr0080801;FBtr0343727	0.442345	0.244242	0.321051	0.760758	0.446802	1
beat-IIb	FBgn0038494	XLOC_013081	3R	FBtr0083411;FBtr0339173	1.13491	0.406116	0.396989	1.02299	0.306312	1
beat-IIIc	FBgn0032629	XLOC_003012	2L	FBtr0080972;FBtr0080971	0.442345	0.244242	0.321051	0.760758	0.446802	1
beat-Vc	FBgn0038084	XLOC_012773	3R	FBtr0082658	1.13889	-0.127558	0.401043	-0.318067	0.750434	1
beat-VII	FBgn0250908	XLOC_013745	3R	FBtr0290328	0.985193	-0.410495	0.408129	-1.0058	0.314514	1
beg	FBgn0036691	XLOC_008040	3L	FBtr0075278	26.9184	0.0924322	0.478008	0.193369	0.84667	0.977488
bel	FBgn0263231	XLOC_012460	3R	FBtr0334319;FBtr0081888	55.6358	-0.359515	0.382136	-0.940804	0.346806	0.785624
Bem46	FBgn0025109	XLOC_000279	2L	FBtr0077643	26.6804	0.0167784	0.481871	0.0348193	0.972224	0.99272
ben	FBgn0000173	XLOC_015086	X	FBtr0300566;FBtr0307296;FBtr0073855;FBtr0332844;FBtr0332843	14.635	-0.929891	0.549563	-1.69206	0.0906354	1
Best1	FBgn0040238	XLOC_012588	3R	FBtr0114590;FBtr0337020;FBtr0306023;FBtr0082183	10.7992	-0.504702	0.58197	-0.867231	0.385815	1
Best2	FBgn0035696	XLOC_008957	3L	FBtr0077010	7.40252	0.610243	0.603561	1.01107	0.311983	1
Best4	FBgn0036491	XLOC_007876	3L	FBtr0113172	2.08853	0.174716	0.461169	0.378855	0.704796	1
Bet1	FBgn0260857	XLOC_008163	3L	FBtr0074989;FBtr0074990	7.0648	0.660827	0.605443	1.09148	0.275063	1
Bet3;Nf-YA		XLOC_009173	3L	FBtr0089879;FBtr0076504	167.39	0.0410526	0.316506	0.129706	0.896799	0.986351
Bet5	FBgn0260860	XLOC_012016	3R	FBtr0085570	1.18544	-0.386909	0.397348	-0.97373		1
beta3GalTII	FBgn0033315	XLOC_005381	2R	FBtr0088728	33.5103	0.135792	0.437626	0.310292	0.756339	0.95812
beta4GalNAcTA	FBgn0027538	XLOC_004110	2R	FBtr0087539	26.6633	0.958759	0.467545	2.05062	0.0403038	0.318301
beta4GalNAcTB	FBgn0039625	XLOC_013881	3R	FBtr0085419	20.7912	-0.0977863	0.507269	-0.19277	0.847139	0.977488
beta4GalT7	FBgn0039258	XLOC_011640	3R	FBtr0084755	30.3912	0.102724	0.471351	0.217936	0.827479	0.973053
betaCOP	FBgn0008635	XLOC_016603	X	FBtr0074576	39.3954	-0.130063	0.438775	-0.296422	0.766908	0.959161
beta'COP	FBgn0025724	XLOC_001106	2L	FBtr0080469	10.4175	-0.0289363	0.587774	-0.0492304	0.960736	1
betaggt-I	FBgn0015000	XLOC_000426	2L	FBtr0330714;FBtr0078991	51.4397	0.414652	0.400512	1.0353	0.300527	0.750688
betaggt-II	FBgn0028970	XLOC_000274	2L	FBtr0077631	37.5254	0.358992	0.442352	0.811554	0.417048	0.836946
betaNACtes5	FBgn0262163	XLOC_015167	X	FBtr0304150	1.2514	0.414866	0.399985	1.0372	0.299641	1
beta-Spec	FBgn0250788	XLOC_015303	X	FBtr0334405;FBtr0334404;FBtr0074454	198.732	-0.305166	0.28917	-1.05531	0.291282	0.750688
betaTry	FBgn0010357	XLOC_003865	2R	FBtr0345928	175.776	-1.37105	0.355113	-3.86088	0.000112979	0.00479329
betaTub56D	FBgn0003887	XLOC_006227	2R	FBtr0086537;FBtr0086536	62.4412	-0.318981	0.409789	-0.778404	0.436331	0.8467
betaTub60D	FBgn0003888	XLOC_005035	2R	FBtr0343443;FBtr0072270	44.6495	-1.86945	0.424044	-4.40861	1.04036e-05	0.000654471
betaTub85D	FBgn0003889	XLOC_012513	3R	FBtr0082046	5.27531	-0.557492	0.605421	-0.920834	0.357137	1
betaTub97EF	FBgn0003890	XLOC_013840	3R	FBtr0334906;FBtr0300611	31.539	-0.302419	0.472264	-0.64036	0.521938	0.885074
BG642163	FBgn0083938	XLOC_000406	2L	FBtr0110769;FBtr0346457	0.26343	-0.205717	0.311207	-0.661028	0.508594	1
BG642312	FBgn0047334	XLOC_008953	3L	FBtr0302931;FBtr0091954	3.48844	0.84002	0.551954	1.5219	0.128034	1
Bgb	FBgn0013753	XLOC_006965	3L	FBtr0330180	4.39536	-0.014645	0.537606	-0.0272411	0.978267	1
bgcn	FBgn0004581	XLOC_006712	2R	FBtr0344878;FBtr0072232	5.78284	0.345583	0.573126	0.602979	0.546522	1
bgm	FBgn0027348	XLOC_001156	2L	FBtr0346624;FBtr0080590	12.4391	-0.328427	0.590345	-0.55633	0.577985	1
BHD	FBgn0261111	XLOC_007320	3L	FBtr0076834	2072.64	-0.0624108	0.198797	-0.313943	0.753564	0.95812
bi	FBgn0000179	XLOC_014545	X	FBtr0070672;FBtr0331162;FBtr0343569;FBtr0300609;FBtr0308915;FBtr0308914	40.7516	-1.0565	0.445996	-2.36886	0.0178432	0.201768
BI-1	FBgn0035871	XLOC_009100	3L	FBtr0076712;FBtr0076711	12.9179	-0.379352	0.556819	-0.681283	0.495692	1
bib	FBgn0000180	XLOC_000832	2L	FBtr0079929	11.5195	0.638584	0.594432	1.07428	0.282699	1
bic	FBgn0000181	XLOC_004013	2R	FBtr0087783;FBtr0087782	263.642	-0.133413	0.267111	-0.499465	0.617452	0.920042
BicC	FBgn0000182	XLOC_001279	2L	FBtr0344489;FBtr0080804;FBtr0344488;FBtr0080805	3.31759	0.889951	0.515858	1.72519		1
BicD	FBgn0000183	XLOC_003027	2L	FBtr0330225;FBtr0330226;FBtr0305688	27.597	-0.398095	0.491186	-0.810477	0.417666	0.836946
bif	FBgn0014133	XLOC_014957	X	FBtr0334463;FBtr0334465;FBtr0334464;FBtr0073527;FBtr0073526	161.278	-0.380127	0.334162	-1.13755	0.255307	0.710779
BigH1	FBgn0038252	XLOC_010908	3R	FBtr0082969	9.42611	0.609632	0.596234	1.02247	0.306557	1
bigmax	FBgn0039509	XLOC_013798	3R	FBtr0085173	80.0012	0.302447	0.342606	0.882783	0.377353	0.809878
Bili	FBgn0039282	XLOC_011658	3R	FBtr0302169;FBtr0302171;FBtr0302170;FBtr0302168;FBtr0301670;FBtr0345299;FBtr0302172	7.17947	-0.289093	0.604494	-0.478239	0.63248	1
bin	FBgn0045759	XLOC_007307	3L	FBtr0076900	7.70861	-1.18392	0.602594	-1.96471	0.0494474	1
Bin1	FBgn0024491	XLOC_013014	3R	FBtr0083279;FBtr0347201;FBtr0347200	569.468	0.254645	0.222648	1.14371	0.252744	0.709731
bin3	FBgn0263144	XLOC_003467	2R	FBtr0085992;FBtr0346718;FBtr0085993;FBtr0336519	172.852	0.564966	0.309845	1.82338	0.0682454	0.420143
bip1	FBgn0026263	XLOC_009065	3L	FBtr0302329;FBtr0076745	14.583	0.0832444	0.550633	0.151179	0.879834	1
bip2	FBgn0026262	XLOC_014184	4	FBtr0089110	68.6501	0.384003	0.410658	0.935092	0.349741	0.788688
Bka	FBgn0010520	XLOC_000817	2L	FBtr0079874	6.66163	1.06318	0.604043	1.76011	0.0783891	1
bl	FBgn0267791	XLOC_004691	2R	FBtr0086221;FBtr0301760;FBtr0086220;FBtr0086219;FBtr0336730;FBtr0086222	15.3046	-0.133733	0.562365	-0.237804	0.812033	1
Blimp-1	FBgn0035625	XLOC_007227	3L	FBtr0331806;FBtr0077089;FBtr0345593;FBtr0331807;FBtr0331808;FBtr0331809	48.4823	-0.37589	0.426669	-0.880986	0.378325	0.810719
Blm	FBgn0002906	XLOC_012687	3R	FBtr0082434	23.6441	-0.118708	0.52371	-0.226668	0.820682	0.973053
Blos1	FBgn0050077	XLOC_004136	2R	FBtr0301734	3.30723	-0.020219	0.580257	-0.034845	0.972203	1
Blos2	FBgn0036118	XLOC_007592	3L	FBtr0076202	108.178	-0.414895	0.347058	-1.19546	0.231906	0.687439
Blos3	FBgn0085284	XLOC_008143	3L	FBtr0112449	9.77574	-0.795737	0.599155	-1.3281	0.184145	1
Blos4	FBgn0036105	XLOC_007578	3L	FBtr0333403;FBtr0076269	10.2928	1.56241	0.605166	2.58179	0.00982888	1
blot	FBgn0027660	XLOC_009721	3L	FBtr0075235;FBtr0339898;FBtr0075234;FBtr0075233;FBtr0075232	4.75768	0.526769	0.581798	0.905416	0.365245	1
blow	FBgn0004133	XLOC_005284	2R	FBtr0300368;FBtr0310050;FBtr0088952	165.471	0.529225	0.275252	1.92269	0.0545185	0.376488
blp	FBgn0038387	XLOC_010991	3R	FBtr0345214;FBtr0083203	3.92791	-0.435976	0.582465	-0.748502	0.454158	1
blue	FBgn0041161	XLOC_009491	3L	FBtr0075781	40.3498	0.936219	0.44349	2.11102	0.0347702	0.294926
blw	FBgn0011211	XLOC_004885	2R	FBtr0071883	100.636	-0.59784	0.360126	-1.66009	0.0968969	0.48351
BM-40-SPARC	FBgn0026562	XLOC_013756	3R	FBtr0334309;FBtr0085094	17.7744	0.204684	0.541133	0.378251	0.705244	1
Bmcp	FBgn0036199	XLOC_007655	3L	FBtr0076114;FBtr0076115	1.60482	-0.21858	0.466321	-0.468734	0.63926	1
bmm	FBgn0036449	XLOC_009525	3L	FBtr0300190;FBtr0075699	24.5872	-0.460385	0.493154	-0.933552	0.350535	0.789173
bnb	FBgn0001090	XLOC_016640	X	FBtr0074656;FBtr0074659;FBtr0074658;FBtr0074657	34.7336	-0.457798	0.445842	-1.02682	0.304506	0.754442
bnk	FBgn0004389	XLOC_012074	3R	FBtr0085754	958.241	-0.0501691	0.226973	-0.221035	0.825065	0.973053
bnl	FBgn0014135	XLOC_013236	3R	FBtr0344549;FBtr0083795;FBtr0300123	7.24212	-0.227983	0.602666	-0.378291	0.705214	1
boca	FBgn0004132	XLOC_005282	2R	FBtr0088953	4.85988	-0.385979	0.603056	-0.640038	0.522148	1
bocksbeutel	FBgn0037719	XLOC_012533	3R	FBtr0100537;FBtr0082105	93.9075	-0.043252	0.373489	-0.115805	0.907807	0.986674
boi	FBgn0040388	XLOC_015692	X	FBtr0070458;FBtr0334883;FBtr0303887;FBtr0303886;FBtr0070457	11.3887	0.655167	0.578948	1.13165	0.257781	1
bol	FBgn0011206	XLOC_009153	3L	FBtr0331858;FBtr0076540;FBtr0076538;FBtr0344979;FBtr0300462;FBtr0076541;FBtr0076539	55.038	0.659969	0.446476	1.47817	0.139362	0.572187
boly	FBgn0050362	XLOC_005360	2R	FBtr0088769	2.02876	-0.39453	0.50451	-0.782006	0.434211	1
bon	FBgn0023097	XLOC_011301	3R	FBtr0300617;FBtr0334639;FBtr0334638;FBtr0334637;FBtr0083912	10.8079	0.261961	0.600002	0.436601	0.662401	1
bond	FBgn0260942	XLOC_011449	3R	FBtr0084261;FBtr0084262;FBtr0084263	5.1155	-0.0124058	0.593511	-0.0209025	0.983323	1
bonsai	FBgn0026261	XLOC_004864	2R	FBtr0071860	16.8256	0.724025	0.547087	1.32342	0.185696	1
bor	FBgn0040237	XLOC_013019	3R	FBtr0083276;FBtr0305998	13.7024	0.459766	0.565505	0.813018	0.416208	1
bora	FBgn0259791	XLOC_008122	3L	FBtr0075108	7.37731	0.0251195	0.598261	0.0419875	0.966509	1
borr	FBgn0032105	XLOC_002471	2L	FBtr0079818;FBtr0079817	5.40257	-0.0907521	0.603306	-0.150425	0.88043	1
botv	FBgn0027535	XLOC_004559	2R	FBtr0086579	38.6151	-0.233717	0.460427	-0.50761	0.611727	0.919003
bou	FBgn0261284	XLOC_014690	X	FBtr0071004	4.60625	0.540515	0.601025	0.899321	0.368482	1
bowl	FBgn0004893	XLOC_000352	2L	FBtr0307027;FBtr0307028;FBtr0077491;FBtr0077490;FBtr0307029;FBtr0077492;FBtr0077493	14.0653	0.0943062	0.564124	0.167173	0.867234	1
BoYb	FBgn0037205	XLOC_008455	3L	FBtr0078559	9.09485	-0.786936	0.601224	-1.30889	0.190572	1
br	FBgn0000210	XLOC_014402	X	FBtr0303564;FBtr0308319;FBtr0300427;FBtr0070261;FBtr0330406;FBtr0070266;FBtr0070262;FBtr0332293;FBtr0070263;FBtr0300429;FBtr0303562;FBtr0070265;FBtr0300428;FBtr0303563	432.687	1.02405	0.224917	4.553	5.28874e-06	0.000391153
Br140	FBgn0033155	XLOC_005252	2R	FBtr0345370;FBtr0089021	9.27613	0.0508542	0.605439	0.0839956	0.93306	1
brat	FBgn0010300	XLOC_001474	2L	FBtr0081158;FBtr0336627;FBtr0081159;FBtr0081160;FBtr0344846	20.8726	-0.553821	0.532579	-1.03988	0.298394	0.750688
Brca2	FBgn0050169	XLOC_005055	2R	FBtr0072302	2.99596	0.491255	0.537125	0.914601	0.360401	1
Brd	FBgn0000216	XLOC_007853	3L	FBtr0075621	0.722213	0.271785	0.337575	0.805111	0.420756	1
Brd8	FBgn0039654	XLOC_011946	3R	FBtr0085394	6.87902	-0.17275	0.60328	-0.286351	0.774609	1
Bre1	FBgn0086694	XLOC_008908	3L	FBtr0344538;FBtr0077116	11.5293	-0.521872	0.601171	-0.868092	0.385344	1
Brf	FBgn0038499	XLOC_013087	3R	FBtr0083452;FBtr0302317	5.59042	0.012167	0.597679	0.0203571	0.983758	1
brk	FBgn0024250	XLOC_014701	X	FBtr0071048	24.1462	-0.238752	0.502406	-0.475218	0.634632	0.927087
brm	FBgn0000212	XLOC_009605	3L	FBtr0075526;FBtr0333580;FBtr0330160;FBtr0075524;FBtr0075523	28.7716	0.491674	0.459771	1.06939	0.284895	0.744617
Brms1	FBgn0030434	XLOC_016251	X	FBtr0073693	3.14723	-0.17931	0.56707	-0.316205	0.751847	1
brn	FBgn0000221	XLOC_014529	X	FBtr0070638	5.41298	-0.631255	0.58109	-1.08633	0.277333	1
Bro	FBgn0013755	XLOC_006967	3L	FBtr0072760	2.81221	0.813746	0.558043	1.45822	0.144781	1
brp	FBgn0259246	XLOC_003725	2R	FBtr0305062;FBtr0305061;FBtr0299916;FBtr0300245;FBtr0299915;FBtr0336693;FBtr0305060;FBtr0300542;FBtr0305059	88.3793	-1.79952	0.369465	-4.8706	1.11259e-06	0.000102249
bru	FBgn0261787	XLOC_003244	2L	FBtr0081403	46.3084	-0.744535	0.492613	-1.5114	0.130687	0.555317
bru-2	FBgn0262475	XLOC_001038	2L	FBtr0304862;FBtr0304859;FBtr0304856;FBtr0332232;FBtr0332233;FBtr0332234;FBtr0304860;FBtr0304858;FBtr0304861;FBtr0304864;FBtr0304863	30.1829	-0.183378	0.475112	-0.385967	0.699521	0.941763
bru-3	FBgn0264001	XLOC_009475	3L	FBtr0330351;FBtr0330355;FBtr0330353;FBtr0330352;FBtr0330345;FBtr0330354;FBtr0330350;FBtr0330347;FBtr0330348;FBtr0330349;FBtr0330346;FBtr0330344;FBtr0330343;FBtr0330356;FBtr0330357	8.74447	-0.259124	0.598162	-0.4332	0.664869	1
Bruce	FBgn0266717	XLOC_012595	3R	FBtr0331682;FBtr0331684;FBtr0331683;FBtr0331681;FBtr0082239	83.2016	-0.275523	0.340348	-0.809532	0.418209	0.836946
brv1	FBgn0036874	XLOC_009865	3L	FBtr0074982	0.442345	0.244242	0.321051	0.760758	0.446802	1
brv3	FBgn0040333	XLOC_015700	X	FBtr0340092;FBtr0300708	546.596	-0.253326	0.243115	-1.042	0.29741	0.750688
BRWD3	FBgn0011785	XLOC_011573	3R	FBtr0084604	96.7526	-0.0653869	0.321793	-0.203196	0.838982	0.975723
bs	FBgn0004101	XLOC_005037	2R	FBtr0290089;FBtr0343314;FBtr0072271	4.16929	-0.516404	0.583417	-0.885138	0.376082	1
bsf	FBgn0032679	XLOC_003082	2L	FBtr0081087	24.4815	0.0925312	0.482379	0.191823	0.847881	0.977488
Bsg	FBgn0261822	XLOC_000669	2L	FBtr0079569;FBtr0079567;FBtr0079566;FBtr0079568;FBtr0079572;FBtr0079570;FBtr0332498;FBtr0079574;FBtr0079571;FBtr0079573	140.421	0.107514	0.309237	0.347676	0.728083	0.94944
Bsg25D	FBgn0000228	XLOC_002154	2L	FBtr0079085;FBtr0310625;FBtr0310624;FBtr0302568;FBtr0079084;FBtr0302567;FBtr0342939	24.6161	0.553584	0.494632	1.11918	0.263062	0.720457
bsh	FBgn0000529	XLOC_003187	2L	FBtr0089320;FBtr0343855	33.6235	-0.025014	0.479397	-0.0521781	0.958387	0.992471
bsk	FBgn0000229	XLOC_002542	2L	FBtr0300982;FBtr0302378;FBtr0080087	10.163	-0.526847	0.585752	-0.899438	0.36842	1
bt	FBgn0005666	XLOC_014140	4	FBtr0301340;FBtr0089793;FBtr0334483;FBtr0344988;FBtr0334482	169.888	-0.0865394	0.352033	-0.245828	0.805816	0.966731
BTBD9	FBgn0030228	XLOC_014884	X	FBtr0071497;FBtr0334456	8.09068	0.0345529	0.595742	0.0579998	0.953749	1
BtbVII	FBgn0263108	XLOC_007060	3L	FBtr0330149;FBtr0307301;FBtr0332096;FBtr0307306;FBtr0307302;FBtr0307304;FBtr0307305	70.9029	-0.0477626	0.376989	-0.126695	0.899182	0.986351
Btd	FBgn0029848	XLOC_015870	X	FBtr0070878	3.2721	0.408964	0.562749	0.726726	0.467394	1
BthD	FBgn0030501	XLOC_015064	X	FBtr0073806	8.27864	-0.753253	0.595015	-1.26594	0.205535	1
Btk29A;mir-2b-1		XLOC_002402	2L	FBtr0112836;FBtr0304201;FBtr0079618;FBtr0330692;FBtr0112835;FBtr0079615;FBtr0330693;FBtr0079617;FBtr0079616	7.60893	-1.42835	0.605459	-2.35912	0.0183185	1
btn	FBgn0014949	XLOC_013423	3R	FBtr0084278	20.2961	0.922967	0.530385	1.74018	0.0818268	0.452362
btsz	FBgn0266756	XLOC_012919	3R	FBtr0334292;FBtr0334291;FBtr0334285;FBtr0334290;FBtr0334293;FBtr0334289;FBtr0334288;FBtr0334287;FBtr0334286	407.662	0.564876	0.229196	2.4646	0.0137166	0.171787
btv	FBgn0023096	XLOC_003056	2L	FBtr0273418	267.993	0.0905603	0.264024	0.343	0.731599	0.95153
btz	FBgn0045862	XLOC_011859	3R	FBtr0330084;FBtr0085220;FBtr0330085;FBtr0085221	195.865	0.278631	0.268665	1.0371	0.299691	0.750688
Bub1	FBgn0031696	XLOC_000457	2L	FBtr0346455;FBtr0079069;FBtr0342934	94.9473	0.184794	0.472817	0.390837	0.695918	0.941763
Bub3	FBgn0025457	XLOC_013918	3R	FBtr0339148;FBtr0085465	1.71591	-0.0830677	0.488169	-0.170162	0.864883	1
BubR1	FBgn0263855	XLOC_005162	2R	FBtr0086032	12.3945	0.603496	0.577597	1.04484	0.296098	1
Buffy	FBgn0040491	XLOC_003887	2R	FBtr0088077	7.17307	-0.367368	0.605382	-0.606837	0.543959	1
Bug22	FBgn0032248	XLOC_002572	2L	FBtr0080044	15.6155	-0.214845	0.554975	-0.387125	0.698663	1
bun	FBgn0259176	XLOC_002724	2L	FBtr0299652;FBtr0339528;FBtr0300523;FBtr0299656;FBtr0300524;FBtr0300522;FBtr0346622;FBtr0299658;FBtr0300521;FBtr0299657	140.381	-0.0777858	0.310258	-0.250713	0.802036	0.965784
bur	FBgn0000239	XLOC_003285	2L	FBtr0343875;FBtr0301342	26.7847	0.385943	0.481045	0.802301	0.422379	0.838937
Burs	FBgn0038901	XLOC_011384	3R	FBtr0084131	1.09326	0.208924	0.426454	0.489909	0.624198	1
bves	FBgn0031150	XLOC_015491	X	FBtr0077246;FBtr0077247;FBtr0332846;FBtr0332845	28.7543	-0.497086	0.474951	-1.0466	0.295282	0.750688
bw	FBgn0000241	XLOC_006678	2R	FBtr0072117;FBtr0346612	88.4632	0.387806	0.426407	0.909474	0.3631	0.799241
bwa	FBgn0045064	XLOC_001531	2L	FBtr0331184;FBtr0081331	41.0385	0.119025	0.447603	0.265916	0.790304	0.961582
Bx42	FBgn0004856	XLOC_016041	X	FBtr0333809;FBtr0071350	18.0538	-0.882267	0.524431	-1.68233	0.0925044	1
by	FBgn0000244	XLOC_012523	3R	FBtr0301093;FBtr0082119;FBtr0302382	69.8729	0.016434	0.386809	0.0424861	0.966111	0.992471
byn	FBgn0011723	XLOC_007671	3L	FBtr0332071;FBtr0332070	8.04696	0.349526	0.597447	0.585033	0.558525	1
bys	FBgn0010292	XLOC_014736	X	FBtr0071090	6.99366	0.535594	0.60485	0.885499	0.375887	1
Bzd	FBgn0011566	XLOC_015697	X	FBtr0070447	48.2659	0.27666	0.454995	0.608051	0.543154	0.893758
c11.1	FBgn0040236	XLOC_016064	X	FBtr0343368;FBtr0071326	220.596	-0.00737532	0.590988	-0.0124796	0.990043	0.997094
c12.1	FBgn0040235	XLOC_016065	X	FBtr0071324	7.0285	0.268097	0.600971	0.446106	0.65552	1
c12.2	FBgn0040234	XLOC_014830	X	FBtr0334929;FBtr0071321	33.3788	-0.243789	0.449224	-0.542688	0.587345	0.906836
C15	FBgn0004863	XLOC_011370	3R	FBtr0084111	1.39789	-0.203922	0.464509	-0.439005	0.660658	1
C1GalTA	FBgn0032078	XLOC_002456	2L	FBtr0079790;FBtr0079789;FBtr0079788	25.2936	0.615594	0.48941	1.25783	0.208454	0.666006
c(2)M	FBgn0028525	XLOC_001294	2L	FBtr0080830	220.647	-0.295844	0.291498	-1.01491	0.310149	0.761528
C3G	FBgn0259228	XLOC_015916	X	FBtr0340087;FBtr0299791;FBtr0300526;FBtr0334968;FBtr0299795;FBtr0299792;FBtr0334969;FBtr0299794;FBtr0299793;FBtr0334967	63.3238	-0.542915	0.377376	-1.43866	0.150248	0.593603
C901	FBgn0021742	XLOC_016146	X	FBtr0073400	1.44776	0.0868925	0.462039	0.188063	0.850827	1
ca	FBgn0000247	XLOC_011981	3R	FBtr0085484;FBtr0346613	11.8511	-0.612251	0.582673	-1.05076	0.293367	1
Ca-alpha1D	FBgn0001991	XLOC_001283	2L	FBtr0332023;FBtr0332024;FBtr0332022;FBtr0332021;FBtr0332025;FBtr0332020;FBtr0090005;FBtr0090004;FBtr0090006;FBtr0090003	3.3423	0.230355	0.558704	0.412302	0.680118	1
Ca-alpha1T	FBgn0264386	XLOC_015865	X	FBtr0334984;FBtr0304610;FBtr0304609;FBtr0112953;FBtr0089393	17.1356	0.536283	0.545872	0.982435	0.325886	1
Ca-beta	FBgn0259822	XLOC_002644	2L	FBtr0306386;FBtr0343617;FBtr0300115;FBtr0343615;FBtr0310280;FBtr0343616;FBtr0310281;FBtr0310279;FBtr0300536	52.0779	1.06254	0.524074	2.02746	0.0426152	0.326917
CaBP1	FBgn0025678	XLOC_002965	2L	FBtr0345544;FBtr0080837	18.3721	-0.445837	0.517012	-0.862333	0.388504	0.81818
cac	FBgn0263111	XLOC_016212	X	FBtr0307315;FBtr0307320;FBtr0307317;FBtr0307325;FBtr0332391;FBtr0307323;FBtr0308609;FBtr0307324;FBtr0307322;FBtr0307318;FBtr0307319;FBtr0307321;FBtr0307316;FBtr0307314;FBtr0307313	32.7867	-0.729712	0.470025	-1.5525	0.120544	0.538522
cact	FBgn0000250	XLOC_002959	2L	FBtr0080845;FBtr0080847;FBtr0080844;FBtr0337081;FBtr0080846	60.0819	0.209322	0.401537	0.521302	0.602156	0.913663
cactin	FBgn0031114	XLOC_015465	X	FBtr0340400	14.5299	-0.343532	0.543869	-0.631645	0.527619	1
cad	FBgn0000251	XLOC_001590	2L	FBtr0335152;FBtr0081412;FBtr0081413	30.5528	-0.0417551	0.498411	-0.0837765	0.933234	0.991368
Cad74A	FBgn0036715	XLOC_009718	3L	FBtr0309231;FBtr0075240;FBtr0075239	0.818111	-0.0223871	0.361464	-0.0619345	0.950615	1
Cad86C	FBgn0261053	XLOC_010631	3R	FBtr0304664;FBtr0304666;FBtr0304665;FBtr0304663;FBtr0301933	46.6608	-0.169969	0.396925	-0.428214	0.668495	0.9364
Cad87A	FBgn0037963	XLOC_012700	3R	FBtr0082513	9.95332	0.0793234	0.583645	0.13591	0.891892	1
Cad88C	FBgn0038247	XLOC_010905	3R	FBtr0344279	35.2443	0.696299	0.502361	1.38605	0.16573	0.621261
Cad89D	FBgn0038439	XLOC_013038	3R	FBtr0301702	1.31493	0.0446721	0.422785	0.105662	0.915851	1
Cad96Ca	FBgn0022800	XLOC_013637	3R	FBtr0084874	1.71452	0.813707	0.503359	1.61655	0.105975	1
Cad96Cb	FBgn0039294	XLOC_013639	3R	FBtr0339260;FBtr0302299;FBtr0301090	55.3726	0.94052	0.426391	2.20577	0.0274002	0.261257
Cad99C	FBgn0039709	XLOC_011984	3R	FBtr0085488;FBtr0303095	8.67272	0.284051	0.597237	0.475608	0.634354	1
CadN	FBgn0015609	XLOC_003047	2L	FBtr0100315;FBtr0100313;FBtr0081016;FBtr0081015;FBtr0100314;FBtr0100316;FBtr0081020;FBtr0081017;FBtr0081019;FBtr0081018;FBtr0081014;FBtr0081013	19.4021	-1.86171	0.533198	-3.49159	0.000480157	0.0152785
CadN2	FBgn0262018	XLOC_003048	2L	FBtr0303836;FBtr0308770	11.4453	-0.884488	0.597945	-1.47921	0.139084	1
Caf1	FBgn0263979	XLOC_010930	3R	FBtr0301845;FBtr0083052	3.28027	-0.192063	0.559716	-0.343144	0.73149	1
Caf1-105	FBgn0033526	XLOC_005530	2R	FBtr0088310	2.13609	0.781583	0.497348	1.5715	0.116067	1
Caf1-180	FBgn0030054	XLOC_016021	X	FBtr0071228	17.4563	0.00494136	0.55713	0.00886931	0.992923	1
cag	FBgn0017414	XLOC_005557	2R	FBtr0331937;FBtr0088239	17.8228	1.09309	0.526991	2.07421	0.0380594	1
CAH1	FBgn0027844	XLOC_001136	2L	FBtr0080539	106.19	-0.552749	0.341448	-1.61884	0.105482	0.506197
CAH2	FBgn0027843	XLOC_007697	3L	FBtr0333381;FBtr0076001	17.6633	-0.511849	0.543663	-0.941483	0.346458	1
CAHbeta	FBgn0037646	XLOC_010501	3R	FBtr0340014;FBtr0081958	166.888	-0.307962	0.302347	-1.01857	0.308407	0.759378
cal1	FBgn0038478	XLOC_011075	3R	FBtr0083400	350.819	0.129332	0.290754	0.444816	0.656453	0.933429
CalpA	FBgn0012051	XLOC_004588	2R	FBtr0086530;FBtr0340532;FBtr0112869;FBtr0086529	11.4229	-0.327111	0.568157	-0.575741	0.564791	1
CalpB	FBgn0025866	XLOC_007533	3L	FBtr0076343;FBtr0304675	84.8806	0.112862	0.343555	0.328513	0.742524	0.952957
Cals	FBgn0039928	XLOC_014210	4	FBtr0345193;FBtr0089208;FBtr0333700;FBtr0089207	31.4532	-0.160528	0.466943	-0.343785	0.731008	0.951441
Calx	FBgn0013995	XLOC_011334	3R	FBtr0309204;FBtr0083998;FBtr0309205;FBtr0309203;FBtr0083999;FBtr0344317;FBtr0344316;FBtr0309202;FBtr0084000	51.2594	-0.0508731	0.402783	-0.126304	0.899492	0.986351
calypso	FBgn0262166	XLOC_005974	2R	FBtr0087246;FBtr0087245	93.9638	-0.305623	0.342317	-0.892806	0.371961	0.806096
Cam;CR43900		XLOC_003938	2R	FBtr0088001;FBtr0304963;FBtr0332931;FBtr0345018;FBtr0088002;FBtr0304964	237.275	-0.551639	0.263175	-2.09609	0.0360744	0.300204
CaMKI	FBgn0016126	XLOC_014126	4	FBtr0089065;FBtr0089063;FBtr0333670;FBtr0089069;FBtr0089067	16.0554	0.358243	0.563676	0.635547	0.525072	1
CaMKII	FBgn0264607	XLOC_014207	4	FBtr0300378;FBtr0089219;FBtr0089218;FBtr0333674;FBtr0333675;FBtr0333673;FBtr0100147;FBtr0100148;FBtr0100146;FBtr0089217;FBtr0300379;FBtr0300377	31.0969	0.420381	0.457082	0.919707	0.357726	0.795221
Camta	FBgn0259234	XLOC_003723	2R	FBtr0301766;FBtr0339382;FBtr0300527;FBtr0299845;FBtr0299847;FBtr0299846;FBtr0339381	49.1215	-0.445917	0.390261	-1.14261	0.253201	0.710285
cana	FBgn0040233	XLOC_000959	2L	FBtr0091678;FBtr0344017;FBtr0344016	69.1143	-0.0422156	0.376821	-0.112031	0.910799	0.988065
CanA1	FBgn0010015	XLOC_012068	3R	FBtr0334546;FBtr0304582;FBtr0085732	4.6292	0.0756193	0.594355	0.127229	0.898759	1
CanA-14F	FBgn0030758	XLOC_016477	X	FBtr0305198;FBtr0074293;FBtr0332870;FBtr0074292	50.6042	-0.184278	0.418865	-0.439947	0.659976	0.933856
CanB	FBgn0010014	XLOC_014580	X	FBtr0308348;FBtr0070764	0.412693	0.246714	0.322651	0.764646	0.444482	1
CanB2	FBgn0015614	XLOC_003569	2R	FBtr0088930;FBtr0309866	23.4862	-0.135744	0.496955	-0.273152	0.784736	0.961582
Cand1	FBgn0027568	XLOC_002563	2L	FBtr0332198;FBtr0080054	5.18337	-0.0396676	0.601098	-0.0659919	0.947384	1
Ca-P60A	FBgn0263006	XLOC_006724	2R	FBtr0343281;FBtr0072215;FBtr0072216;FBtr0072218;FBtr0072217;FBtr0072214;FBtr0072213;FBtr0072212;FBtr0072211	207.984	0.149221	0.272015	0.548576	0.583296	0.906836
Capa	FBgn0039722	XLOC_013945	3R	FBtr0085514	1.12291	0.203989	0.425194	0.479755	0.631402	1
CapaR	FBgn0037100	XLOC_010048	3L	FBtr0333458;FBtr0078379	0.855038	0.386849	0.389016	0.99443	0.320014	1
Cap-D2	FBgn0039680	XLOC_011964	3R	FBtr0085452	1.10675	-0.100387	0.432365	-0.23218	0.816398	1
Cap-D3	FBgn0051989	XLOC_000473	2L	FBtr0301318;FBtr0079097	2.00743	-0.0713704	0.463244	-0.154067	0.877557	1
Caper;milt		XLOC_000605	2L	FBtr0344709;FBtr0344712;FBtr0344710;FBtr0344708;FBtr0089640;FBtr0344711;FBtr0089636;FBtr0306228;FBtr0306229;FBtr0306233;FBtr0306231;FBtr0306232;FBtr0306230	288.219	-0.589632	0.266002	-2.21665	0.0266473	0.256544
Cap-G	FBgn0259876	XLOC_004027	2R	FBtr0301325;FBtr0299507	24.6182	0.158314	0.488401	0.324147	0.745826	0.954087
Cap-H2	FBgn0037831	XLOC_010625	3R	FBtr0302571;FBtr0301311;FBtr0301310;FBtr0082273	44.0376	0.0965424	0.44869	0.215165	0.829639	0.973784
Capr	FBgn0042134	XLOC_009805	3L	FBtr0075098;FBtr0345806	66.0869	-0.172976	0.359799	-0.480758	0.630689	0.926398
caps	FBgn0023095	XLOC_007772	3L	FBtr0075833;FBtr0075832	30.9293	-0.3442	0.514687	-0.668755	0.503652	0.881511
Caps	FBgn0053653	XLOC_014160	4	FBtr0333702;FBtr0307334;FBtr0307333;FBtr0091631;FBtr0091630	23.6338	0.308026	0.525964	0.585642	0.558116	0.897611
capt	FBgn0261458	XLOC_001838	2L	FBtr0332274;FBtr0100023;FBtr0100022	59.0908	-0.407238	0.3925	-1.03755	0.299479	0.750688
capu	FBgn0000256	XLOC_002065	2L	FBtr0290079;FBtr0077513;FBtr0077512;FBtr0290081;FBtr0290080;FBtr0077511;FBtr0290082;FBtr0290078;FBtr0290077	31.185	-1.60356	0.53457	-2.99971	0.00270233	0.0543745
car	FBgn0000257	XLOC_015411	X	FBtr0074727;FBtr0074728	13.1348	-0.711541	0.603147	-1.17971	0.238114	1
cas	FBgn0004878	XLOC_012255	3R	FBtr0339518;FBtr0078725	3.63032	0.714012	0.590239	1.2097	0.226394	1
Cas	FBgn0022213	XLOC_002992	2L	FBtr0080930	61.2525	0.405651	0.3741	1.08434	0.278214	0.736298
CASK;CRG		XLOC_013369	3R	FBtr0301327;FBtr0343762;FBtr0084162;FBtr0301328;FBtr0112873;FBtr0112872;FBtr0330368	22.0163	0.225577	0.555987	0.405722	0.684947	0.939361
casp	FBgn0034068	XLOC_005961	2R	FBtr0339756;FBtr0087259;FBtr0087260	26.919	0.344607	0.504458	0.683125	0.494528	0.878093
Cat	FBgn0000261	XLOC_008135	3L	FBtr0075058	42.406	0.688857	0.429899	1.60237	0.109074	0.514623
cathD	FBgn0029093	XLOC_005305	2R	FBtr0088898	37.3115	-0.346574	0.471738	-0.734676	0.462537	0.86153
Catsup	FBgn0002022	XLOC_001460	2L	FBtr0081143	51.3904	-0.587164	0.389806	-1.5063	0.131991	0.556537
caup	FBgn0015919	XLOC_007724	3L	FBtr0075909	7.359	-0.677585	0.605406	-1.11922	0.263045	1
cav	FBgn0026257	XLOC_011561	3R	FBtr0084557;FBtr0084556;FBtr0084558;FBtr0084559	218.398	0.138208	0.285401	0.484257	0.628203	0.925681
caz	FBgn0011571	XLOC_015228	X	FBtr0334991;FBtr0334992;FBtr0334990;FBtr0074217	7.35997	-0.167402	0.596273	-0.280748	0.778904	1
cbc	FBgn0033842	XLOC_005778	2R	FBtr0087701	2.93821	0.0390357	0.55458	0.0703879	0.943885	1
Cbl	FBgn0020224	XLOC_007409	3L	FBtr0076614;FBtr0076615	184.936	1.39874	0.366855	3.81278	0.000137412	0.00550843
CBP	FBgn0026144	XLOC_014704	X	FBtr0071052;FBtr0071053	6.11944	0.548754	0.604102	0.90838	0.363677	1
Cbp20	FBgn0022943	XLOC_011158	3R	FBtr0083551	74.6837	-0.420748	0.387358	-1.0862	0.277391	0.735085
Cbp53E	FBgn0004580	XLOC_004339	2R	FBtr0340072;FBtr0087056	35.4413	2.26151	0.543017	4.1647	3.11756e-05	0.00170624
Cbp80	FBgn0022942	XLOC_014555	X	FBtr0070683;FBtr0070684	4.28584	0.655225	0.599059	1.09376	0.274061	1
cbs	FBgn0086757	XLOC_004056	2R	FBtr0309887;FBtr0309886;FBtr0087666	3.98593	0.00345571	0.573579	0.00602481	0.995193	1
Cbs	FBgn0031148	XLOC_015490	X	FBtr0077244;FBtr0340437;FBtr0077245	15.2371	0.156698	0.557216	0.281216	0.778545	1
cbt	FBgn0043364	XLOC_001800	2L	FBtr0310030;FBtr0078084;FBtr0078083	26.8284	0.186311	0.549647	0.338965	0.734636	0.951897
cbx	FBgn0011241	XLOC_005477	2R	FBtr0088453;FBtr0332915;FBtr0088452	7.88217	-0.403123	0.600587	-0.671215	0.502084	1
Cby	FBgn0067317	XLOC_011390	3R	FBtr0336880;FBtr0336879	3.53678	0.169148	0.576258	0.293529	0.769118	1
CCAP	FBgn0039007	XLOC_013428	3R	FBtr0335007;FBtr0084333	6.99218	-0.614396	0.605334	-1.01497	0.31012	1
CCAP-R	FBgn0039396	XLOC_013708	3R	FBtr0304043	49.9497	2.09449	0.410024	5.10821	3.25228e-07	3.58055e-05
CCDC151	FBgn0036219	XLOC_007668	3L	FBtr0076037	0.721762	-0.251635	0.334098	-0.753177	0.451343	1
CCHa1	FBgn0038199	XLOC_012859	3R	FBtr0113232	9.82624	-0.300653	0.582201	-0.516407	0.60557	1
CCHa1-R	FBgn0050106	XLOC_006106	2R	FBtr0086893	2.27869	-0.196528	0.502619	-0.391007	0.695792	1
CCHa2	FBgn0038147	XLOC_012813	3R	FBtr0303263;FBtr0303262;FBtr0082762	4.11756	-1.45546	0.583748	-2.49331	0.0126559	1
CCHa2-R	FBgn0033058	XLOC_003448	2R	FBtr0301687;FBtr0085975	5.86	0.168418	0.605372	0.278205	0.780855	1
Cchl	FBgn0038925	XLOC_013386	3R	FBtr0335198;FBtr0084185	7.69061	0.118508	0.60515	0.195832	0.844741	1
CCKLR-17D1	FBgn0259231	XLOC_016632	X	FBtr0299681	0.412693	0.246714	0.322651	0.764646	0.444482	1
CCKLR-17D3	FBgn0030954	XLOC_016637	X	FBtr0113003	0.813672	0.00936567	0.36477	0.0256756	0.979516	1
Ccm3	FBgn0038331	XLOC_010953	3R	FBtr0083094	31.9625	-0.415023	0.447218	-0.92801	0.353402	0.792125
Ccn	FBgn0052183	XLOC_008076	3L	FBtr0075186	1.14812	0.198476	0.404734	0.490386	0.623861	1
Ccs	FBgn0010531	XLOC_005502	2R	FBtr0333068;FBtr0300944	16.7021	0.276372	0.532198	0.519303	0.603549	1
Cct1;Cct2		XLOC_006957	3L	FBtr0333396;FBtr0072738;FBtr0345365;FBtr0072739;FBtr0072740;FBtr0072741;FBtr0072742	62.8079	0.587533	0.371381	1.58202	0.113645	0.525762
Cct5	FBgn0010621	XLOC_003925	2R	FBtr0087987;FBtr0087988	37.6785	-0.604756	0.434586	-1.39157	0.164053	0.618363
Cctgamma	FBgn0015019	XLOC_011052	3R	FBtr0302370;FBtr0302371;FBtr0083338;FBtr0083337	47.2109	0.163791	0.420778	0.389258	0.697086	0.941763
Ccz1	FBgn0035470	XLOC_008773	3L	FBtr0073180	81.3818	-0.62613	0.339778	-1.84276	0.0653635	0.410717
cd	FBgn0263986	XLOC_011462	3R	FBtr0084303	10.6061	-0.203239	0.582181	-0.349099	0.727015	1
CD98hc	FBgn0037533	XLOC_012404	3R	FBtr0331344;FBtr0081824;FBtr0332157;FBtr0331342	56.4642	0.0686898	0.385162	0.17834	0.858456	0.97822
Cda4	FBgn0052499	XLOC_016845	X	FBtr0077362	0.412693	0.246714	0.322651	0.764646	0.444482	1
Cda5	FBgn0051973	XLOC_001763	2L	FBtr0113416;FBtr0309227;FBtr0309229;FBtr0309228;FBtr0309225;FBtr0078164;FBtr0078163;FBtr0309226	879.408	0.628909	0.231006	2.72248	0.00647942	0.102491
Cda9	FBgn0034197	XLOC_004354	2R	FBtr0340127;FBtr0086984	6.75187	-0.479861	0.60538	-0.792661	0.427975	1
CDase	FBgn0039774	XLOC_012032	3R	FBtr0331357;FBtr0085645;FBtr0085649;FBtr0085648;FBtr0085647;FBtr0085646	25.3389	-0.229068	0.504001	-0.454499	0.64947	0.931486
cdc14	FBgn0031952	XLOC_002356	2L	FBtr0343423;FBtr0301331;FBtr0301330;FBtr0079492;FBtr0343424	96.8258	0.261594	0.335923	0.778734	0.436136	0.8467
Cdc16;CG6763		XLOC_011495	3R	FBtr0084377;FBtr0084378;FBtr0334497	1.31493	0.0446721	0.422785	0.105662	0.915851	1
Cdc23	FBgn0032863	XLOC_001561	2L	FBtr0332969;FBtr0081362	7.85329	-0.830081	0.599868	-1.38377	0.166428	1
Cdc27	FBgn0012058	XLOC_009012	3L	FBtr0333369;FBtr0076890	7.0039	0.206758	0.603369	0.342673	0.731844	1
cdc2rk	FBgn0013435	XLOC_005497	2R	FBtr0088429	63.1749	-0.423093	0.425816	-0.993607	0.320414	0.76544
Cdc37;CG12020		XLOC_006981	3L	FBtr0072777;FBtr0072778	8.95068	-0.175089	0.60546	-0.289183	0.772441	1
Cdc42	FBgn0010341	XLOC_015425	X	FBtr0074751;FBtr0309215;FBtr0309214	43.4511	-0.780656	0.427572	-1.82579	0.0678821	0.419795
CDC45L	FBgn0026143	XLOC_015601	X	FBtr0070182	18.6307	0.623677	0.548551	1.13695	0.255558	0.711029
Cdc5	FBgn0265574	XLOC_008533	3L	FBtr0300727;FBtr0072569	9.84606	0.516031	0.595079	0.867163	0.385853	1
Cdc6	FBgn0035918	XLOC_009122	3L	FBtr0076647	71.4472	0.0815743	0.383339	0.212799	0.831484	0.974321
Cdep	FBgn0265082	XLOC_010208	3R	FBtr0336810;FBtr0336812;FBtr0336811;FBtr0336809	73.469	-0.396401	0.392427	-1.01013	0.312435	0.763306
CdGAPr	FBgn0032821	XLOC_003188	2L	FBtr0332179;FBtr0081318;FBtr0300967;FBtr0300966	10.2883	0.576344	0.60533	0.952115	0.341039	1
cdi	FBgn0004876	XLOC_013201	3R	FBtr0305321;FBtr0083716	65.7087	-0.0985207	0.370527	-0.265893	0.790321	0.961582
Cdk1	FBgn0004106	XLOC_002565	2L	FBtr0080051	194.277	-0.286802	0.25884	-1.10803	0.26785	0.726366
Cdk12	FBgn0037093	XLOC_008343	3L	FBtr0078357;FBtr0332716;FBtr0078358	20.0878	0.737852	0.526753	1.40075	0.161288	0.61173
Cdk2	FBgn0004107	XLOC_011310	3R	FBtr0083922;FBtr0083921;FBtr0300447	7.86211	1.19272	0.605216	1.97074	0.0487539	1
Cdk4	FBgn0016131	XLOC_004294	2R	FBtr0087102;FBtr0087103;FBtr0345340;FBtr0087104;FBtr0340063	13.2983	0.437176	0.581464	0.751855	0.452138	1
Cdk5	FBgn0013762	XLOC_005930	2R	FBtr0087350	11.9836	0.177954	0.592627	0.30028	0.763964	1
Cdk5alpha	FBgn0027491	XLOC_002555	2L	FBtr0080063;FBtr0331670	0.26343	-0.205717	0.311207	-0.661028	0.508594	1
Cdk7	FBgn0263237	XLOC_015811	X	FBtr0070756	0.818111	-0.0223871	0.361464	-0.0619345	0.950615	1
Cdk8	FBgn0015618	XLOC_009206	3L	FBtr0076369	3.52271	0.721127	0.591615	1.21891	0.222878	1
Cdk9	FBgn0019949	XLOC_006585	2R	FBtr0071937	1.08154	-0.143504	0.428758	-0.334696	0.737854	1
cdm	FBgn0261532	XLOC_013137	3R	FBtr0336472;FBtr0083619	272.493	0.571221	0.265391	2.15238	0.0313676	0.281896
CdsA	FBgn0010350	XLOC_007377	3L	FBtr0346546;FBtr0076688	42.39	0.35184	0.421566	0.834601	0.403942	0.82956
CecC	FBgn0000279	XLOC_012022	3R	FBtr0085616	1.12274	-0.367417	0.389518	-0.943261		1
Ced-12	FBgn0032409	XLOC_001024	2L	FBtr0080330	4.56216	-0.139962	0.566953	-0.246866	0.805012	1
ced-6	FBgn0029092	XLOC_005446	2R	FBtr0088550;FBtr0339384;FBtr0088549;FBtr0088548;FBtr0306808	54.982	0.336968	0.420257	0.801813	0.422661	0.838937
Cen	FBgn0032876	XLOC_003246	2L	FBtr0081401;FBtr0081399	22.1092	0.0439944	0.524939	0.0838085	0.933209	0.991368
CenB1A	FBgn0039056	XLOC_011491	3R	FBtr0084368;FBtr0084369	71.0759	0.271913	0.376246	0.722701	0.469863	0.865601
CenG1A	FBgn0028509	XLOC_001142	2L	FBtr0080546;FBtr0080547;FBtr0080548	79.1364	0.264427	0.349372	0.756862	0.449133	0.855151
Cenp-C	FBgn0266916	XLOC_010473	3R	FBtr0339328;FBtr0089973	5.31231	0.438661	0.598201	0.7333	0.463376	1
Cep135	FBgn0036480	XLOC_007865	3L	FBtr0333853;FBtr0303375;FBtr0075638	4.3401	0.0880302	0.561532	0.156768	0.875428	1
Cep89	FBgn0266708	XLOC_005937	2R	FBtr0087320	8.29098	-0.0942743	0.604166	-0.15604	0.876001	1
Cep97	FBgn0031575	XLOC_000363	2L	FBtr0077504;FBtr0301082	20.8236	0.398827	0.530679	0.751541	0.452327	0.855151
cer	FBgn0034443	XLOC_006222	2R	FBtr0086551	7.58023	-1.14428	0.604298	-1.89356	0.0582832	1
Cerk	FBgn0037315	XLOC_012210	3R	FBtr0078804;FBtr0078803	6.30537	-0.0285568	0.605452	-0.047166	0.962381	1
cert	FBgn0027569	XLOC_009095	3L	FBtr0332136;FBtr0345035;FBtr0076717	22.6551	-0.574735	0.522854	-1.09923	0.271669	0.730762
cerv	FBgn0030657	XLOC_016403	X	FBtr0310052;FBtr0089702;FBtr0346182	0.26343	-0.205717	0.311207	-0.661028	0.508594	1
Cf2	FBgn0000286	XLOC_002119	2L	FBtr0304887;FBtr0336835;FBtr0089649;FBtr0089648;FBtr0089647	15.7464	-0.0485704	0.535702	-0.0906669	0.927757	1
Cfp1	FBgn0030121	XLOC_016063	X	FBtr0302964;FBtr0071327	11.306	-0.092882	0.586311	-0.158418	0.874128	1
cg	FBgn0000289	XLOC_004103	2R	FBtr0087528;FBtr0290034;FBtr0339962;FBtr0339960;FBtr0087529;FBtr0087527;FBtr0087526;FBtr0346946;FBtr0339961;FBtr0290035;FBtr0112795	21.0058	0.147001	0.54672	0.268877	0.788024	0.961582
CG10000	FBgn0039596	XLOC_013865	3R	FBtr0085315	2.19912	-0.361203	0.501765	-0.719866	0.471607	1
CG10005	FBgn0037972	XLOC_012705	3R	FBtr0335438;FBtr0082507	18.7615	-0.338772	0.527149	-0.64265	0.520451	0.885074
CG10011	FBgn0039590	XLOC_013861	3R	FBtr0085319	76.7322	-0.0562896	0.359545	-0.156558	0.875593	0.98159
CG10013	FBgn0038012	XLOC_010743	3R	FBtr0082567	2.2738	0.234232	0.504134	0.464623	0.642201	1
CG10019	FBgn0031568	XLOC_000348	2L	FBtr0321291;FBtr0273188	2.16789	-0.459816	0.537717	-0.855127	0.392481	1
CG10026	FBgn0032785	XLOC_001493	2L	FBtr0081236;FBtr0332317;FBtr0081238;FBtr0081237	8.98392	-0.773396	0.602595	-1.28344	0.199337	1
CG10031	FBgn0031563	XLOC_002052	2L	FBtr0077544	0.592718	-0.244268	0.330703	-0.738634	0.460129	1
CG10035	FBgn0038028	XLOC_012739	3R	FBtr0344387;FBtr0082606	3.79679	-0.114009	0.562921	-0.202532	0.839501	1
CG10038	FBgn0038013	XLOC_012732	3R	FBtr0082615;FBtr0082614	0.856149	-0.293102	0.355913	-0.82352	0.410212	1
CG10050	FBgn0037492	XLOC_010379	3R	FBtr0081577	0.761496	-0.246955	0.332224	-0.743339	0.457276	1
CG10051	FBgn0034437	XLOC_004578	2R	FBtr0086521	2.57539	0.184954	0.56799	0.32563	0.744705	1
CG10055	FBgn0037482	XLOC_012346	3R	FBtr0081605	6.55474	-0.304553	0.60515	-0.503269	0.614775	1
CG10062	FBgn0034439	XLOC_004579	2R	FBtr0334005;FBtr0086522;FBtr0334006	0.442345	0.244242	0.321051	0.760758	0.446802	1
CG10063	FBgn0035727	XLOC_008994	3L	FBtr0076935	130.146	-0.163147	0.352294	-0.463099	0.643294	0.92934
CG10064	FBgn0035724	XLOC_008992	3L	FBtr0076937	5.95127	-0.192935	0.601343	-0.320839	0.748332	1
CG10068	FBgn0037473	XLOC_012340	3R	FBtr0081611	104.582	-0.243158	0.352503	-0.689806	0.490316	0.876807
CG10073	FBgn0034440	XLOC_004580	2R	FBtr0310321;FBtr0086523	0.442345	0.244242	0.321051	0.760758	0.446802	1
CG10075	FBgn0035722	XLOC_008990	3L	FBtr0076939	22.1839	0.256657	0.492233	0.521412	0.60208	0.913663
CG10077	FBgn0035720	XLOC_008989	3L	FBtr0333083;FBtr0076940;FBtr0300937	29.951	-0.146291	0.456582	-0.320404	0.748662	0.955513
CG10081	FBgn0034441	XLOC_004581	2R	FBtr0334007;FBtr0086524	2.76909	0.234856	0.535537	0.438544	0.660992	1
CG10082	FBgn0034644	XLOC_004785	2R	FBtr0071661;FBtr0071662	47.3753	0.161351	0.397713	0.405696	0.684966	0.939361
CG10086	FBgn0037517	XLOC_010410	3R	FBtr0081744	15.8377	-0.338682	0.554492	-0.610797	0.541334	1
CG10089	FBgn0036369	XLOC_009471	3L	FBtr0331535;FBtr0075820;FBtr0345364;FBtr0075823;FBtr0075822;FBtr0075821	3.8709	-1.36272	0.578437	-2.35586	0.0184798	1
CG10092	FBgn0037526	XLOC_010414	3R	FBtr0081752;FBtr0333826	513.634	-0.483468	0.219789	-2.19969	0.027829	0.263965
CG10096;CG10097		XLOC_012740	3R	FBtr0347003;FBtr0347002;FBtr0082604;FBtr0344386;FBtr0100525	19.8654	-2.11156	0.590353	-3.57678	0.000347857	0.0118989
CG10098	FBgn0037472	XLOC_010364	3R	FBtr0081563	37.7662	-0.0357173	0.443014	-0.0806233	0.935742	0.991392
CG10103	FBgn0035715	XLOC_008980	3L	FBtr0330062;FBtr0330064;FBtr0330063;FBtr0330061;FBtr0076949;FBtr0330065	33.1026	-0.0645402	0.440464	-0.146528	0.883505	0.983611
CG10116	FBgn0036367	XLOC_009470	3L	FBtr0075824	9.21708	0.265621	0.597529	0.444533	0.656657	1
CG10126	FBgn0038088	XLOC_012779	3R	FBtr0082686;FBtr0082687	9.25721	0.854	0.596849	1.43085	0.152474	1
CG10132	FBgn0032798	XLOC_001501	2L	FBtr0081247;FBtr0343771	94.701	0.00717596	0.353342	0.0203088	0.983797	0.995661
CG10133	FBgn0036366	XLOC_009469	3L	FBtr0075825	6.55357	0.572347	0.604578	0.946689	0.343797	1
CG10137	FBgn0032800	XLOC_001502	2L	FBtr0081248	114.903	0.30688	0.319039	0.961888	0.336106	0.777306
CG10139	FBgn0033951	XLOC_004153	2R	FBtr0087433;FBtr0339980	1.84467	-0.0924707	0.509662	-0.181435	0.856026	1
CG10140	FBgn0036363	XLOC_009468	3L	FBtr0075853	1.11847	0.23559	0.433733	0.543167	0.587015	1
CG10144	FBgn0035704	XLOC_008967	3L	FBtr0076986	3.0591	0.569982	0.559814	1.01816	0.3086	1
CG10147	FBgn0035702	XLOC_008966	3L	FBtr0333060;FBtr0076987	4.10519	-0.488512	0.594741	-0.821387	0.411426	1
CG10151	FBgn0033960	XLOC_005866	2R	FBtr0087473;FBtr0289934;FBtr0087472;FBtr0087471	4.08357	-0.176462	0.588296	-0.299954	0.764213	1
CG10163	FBgn0035697	XLOC_008958	3L	FBtr0077009	0.26343	-0.205717	0.311207	-0.661028	0.508594	1
CG10164	FBgn0039088	XLOC_013497	3R	FBtr0300585;FBtr0084417	3.11104	-0.758882	0.56885	-1.33406	0.182183	1
CG10165	FBgn0032801	XLOC_003170	2L	FBtr0303779;FBtr0344843;FBtr0303780;FBtr0081278;FBtr0081277	43.0778	0.23095	0.415865	0.555348	0.578657	0.906148
CG10166	FBgn0032799	XLOC_003169	2L	FBtr0081279	1.85317	-0.0980539	0.511459	-0.191714	0.847966	1
CG10168	FBgn0039087	XLOC_013496	3R	FBtr0084418	7.60837	-1.16044	0.604648	-1.9192	0.0549594	1
CG10170	FBgn0039085	XLOC_013494	3R	FBtr0084420	13.3741	-0.205347	0.602065	-0.34107	0.733051	1
CG10171	FBgn0036353	XLOC_009457	3L	FBtr0075865;FBtr0075864	3.49705	0.116423	0.561403	0.207378	0.835714	1
CG10175	FBgn0039084	XLOC_013493	3R	FBtr0344701;FBtr0339621;FBtr0084423;FBtr0084422;FBtr0084421	0.843324	0.00664832	0.36676	0.0181272	0.985537	1
CG10176	FBgn0032682	XLOC_001420	2L	FBtr0300674;FBtr0332321	26.7879	-0.258991	0.511916	-0.505925	0.612909	0.919003
CG10177	FBgn0039083	XLOC_013492	3R	FBtr0084424	34.7348	-0.0809524	0.45623	-0.177438	0.859165	0.978404
CG10178	FBgn0032684	XLOC_001421	2L	FBtr0081068;FBtr0305619	4.52958	-0.516029	0.579845	-0.889942	0.373497	1
CG10182	FBgn0039091	XLOC_013498	3R	FBtr0084486	15.3496	-0.700724	0.556207	-1.25982	0.207733	1
CG10183	FBgn0039093	XLOC_013501	3R	FBtr0273191	38.836	-3.12113	0.483389	-6.45677	1.06961e-10	2.66089e-08
CG10184	FBgn0039094	XLOC_013503	3R	FBtr0084481	10.8086	-2.58322	0.604122	-4.27599	1.90287e-05	1
CG10185	FBgn0038397	XLOC_013008	3R	FBtr0083235	95.0324	0.514989	0.340321	1.51325	0.130217	0.554182
CG10186	FBgn0032797	XLOC_003167	2L	FBtr0302108;FBtr0302107;FBtr0081280;FBtr0081281;FBtr0299519	2.81665	0.666273	0.528226	1.26134	0.207186	1
CG10188	FBgn0032796	XLOC_003166	2L	FBtr0329963;FBtr0081283;FBtr0081282	29.8547	0.680264	0.482113	1.41101	0.158243	0.608173
CG10189	FBgn0032793	XLOC_003165	2L	FBtr0081284;FBtr0331327	13.6514	0.55526	0.5674	0.978605	0.327775	1
CG10194	FBgn0032790	XLOC_003164	2L	FBtr0081285	10.6525	-0.657132	0.58339	-1.1264	0.259995	1
CG10195	FBgn0032787	XLOC_003163	2L	FBtr0332318;FBtr0302930	0.985193	-0.410495	0.408129	-1.0058	0.314514	1
CG10205	FBgn0033970	XLOC_004162	2R	FBtr0087447;FBtr0087446	0.442345	0.244242	0.321051	0.760758	0.446802	1
CG10208	FBgn0039118	XLOC_013521	3R	FBtr0084461	6.17829	-0.521565	0.605368	-0.861567	0.388926	1
CG10209	FBgn0033971	XLOC_005875	2R	FBtr0087462	30.2657	1.43123	0.464363	3.08213	0.00205526	0.0457254
CG10211	FBgn0032685	XLOC_001422	2L	FBtr0081069;FBtr0343824	99.5852	0.69113	0.347646	1.98803	0.0468088	0.346195
CG10214	FBgn0039115	XLOC_013519	3R	FBtr0084463	228.056	-0.577528	0.336949	-1.71399	0.0865307	0.459415
CG10217	FBgn0039113	XLOC_013518	3R	FBtr0084465;FBtr0084464	21.315	0.767771	0.51494	1.49099	0.135964	0.564591
CG10219	FBgn0039112	XLOC_013517	3R	FBtr0084466	82.7522	-0.0754988	0.360634	-0.20935	0.834175	0.975105
CG10226	FBgn0035695	XLOC_008955	3L	FBtr0332068;FBtr0077012	27.9849	0.141135	0.521436	0.270666	0.786648	0.961582
CG10232	FBgn0039108	XLOC_013511	3R	FBtr0345300	1.00541	-0.0567331	0.391135	-0.145047	0.884674	1
CG10237	FBgn0032783	XLOC_003158	2L	FBtr0334176;FBtr0081209;FBtr0081208;FBtr0081207;FBtr0308679	59.6309	0.214192	0.41636	0.514441	0.606944	0.916613
CG1024	FBgn0027514	XLOC_012291	3R	FBtr0332176;FBtr0332175;FBtr0290212	2.75205	0.309543	0.488123	0.63415	0.525983	1
CG10249	FBgn0027596	XLOC_005884	2R	FBtr0303758;FBtr0301334;FBtr0087431;FBtr0332856;FBtr0303756;FBtr0087430;FBtr0087429;FBtr0112929;FBtr0303757	353.886	0.182049	0.260068	0.700005	0.483924	0.874399
CG10252	FBgn0039104	XLOC_013506	3R	FBtr0084475	0.442345	0.244242	0.321051	0.760758	0.446802	1
CG10253	FBgn0033983	XLOC_005885	2R	FBtr0303760;FBtr0087428;FBtr0303762;FBtr0303761	21.4696	-0.271409	0.505745	-0.536652	0.591508	0.908085
CG10254	FBgn0027512	XLOC_013505	3R	FBtr0334770;FBtr0084477;FBtr0084476	5.80394	0.499798	0.602437	0.829626	0.40675	1
CG10257	FBgn0033985	XLOC_004173	2R	FBtr0087408	102.292	0.579716	0.32129	1.80434	0.0711776	0.429023
CG10262	FBgn0032813	XLOC_003178	2L	FBtr0081262	1.66409	0.658444	0.471349	1.39694	0.162433	1
CG10264	FBgn0038394	XLOC_010999	3R	FBtr0083222	23.5601	0.17804	0.500932	0.355417	0.722277	0.947661
CG10265	FBgn0033990	XLOC_005889	2R	FBtr0332259;FBtr0087421	0.721762	-0.251635	0.334098	-0.753177	0.451343	1
CG10268	FBgn0032811	XLOC_003176	2L	FBtr0081266	13.2354	0.961614	0.5978	1.60859	0.107706	1
CG10274	FBgn0035690	XLOC_008947	3L	FBtr0113149	8.94937	-0.308072	0.598653	-0.514609	0.606826	1
CG10280	FBgn0037395	XLOC_012273	3R	FBtr0309318;FBtr0078648	0.442345	0.244242	0.321051	0.760758	0.446802	1
CG10283	FBgn0032681	XLOC_003083	2L	FBtr0081086;FBtr0081085;FBtr0300676;FBtr0300675	50.9263	0.380354	0.397225	0.957526	0.338302	0.779262
CG10286	FBgn0037439	XLOC_010317	3R	FBtr0081717	26.3487	-0.364273	0.483798	-0.752945	0.451483	0.855151
CG10289	FBgn0035688	XLOC_008946	3L	FBtr0331790;FBtr0077019;FBtr0331791;FBtr0331789	33.2423	0.218102	0.472233	0.461853	0.644186	0.929755
CG10298	FBgn0037432	XLOC_010312	3R	FBtr0081710	8.7368	0.668431	0.599048	1.11582	0.264498	1
CG10300	FBgn0039107	XLOC_011518	3R	FBtr0084445	2.61467	-0.338648	0.561715	-0.602882	0.546587	1
CG10301	FBgn0039106	XLOC_011517	3R	FBtr0114504	1.08154	-0.143504	0.428758	-0.334696	0.737854	1
CG10306	FBgn0034654	XLOC_004793	2R	FBtr0071670	25.798	-0.0599371	0.489138	-0.122536	0.902474	0.986409
CG10307	FBgn0034655	XLOC_004794	2R	FBtr0071671;FBtr0345486	318.159	-0.107294	0.256163	-0.418849	0.675326	0.938264
CG10311	FBgn0038420	XLOC_013023	3R	FBtr0345202;FBtr0083324	20.8803	-0.552844	0.531134	-1.04087	0.297934	0.750688
CG10317	FBgn0038423	XLOC_013026	3R	FBtr0300678;FBtr0300677	2.03478	-0.40735	0.495459	-0.822168	0.410981	1
CG10320	FBgn0034645	XLOC_004786	2R	FBtr0300680;FBtr0113101;FBtr0300679;FBtr0113102;FBtr0071663	72.2696	0.0449063	0.373185	0.120332	0.90422	0.986409
CG10321	FBgn0034643	XLOC_004784	2R	FBtr0330228	28.9433	-0.274799	0.495614	-0.554462	0.579263	0.906578
CG10324	FBgn0038454	XLOC_013047	3R	FBtr0083356	41.3468	0.257169	0.451493	0.569597	0.568951	0.902502
CG10326	FBgn0038453	XLOC_011051	3R	FBtr0083336;FBtr0333728	11.4603	-0.622654	0.593511	-1.0491	0.294131	1
CG10333	FBgn0032690	XLOC_001425	2L	FBtr0081072	10.107	0.201004	0.585846	0.3431	0.731523	1
CG10336	FBgn0032698	XLOC_001429	2L	FBtr0273194;FBtr0081095	16.2984	0.73445	0.546356	1.34427	0.178861	1
CG10337	FBgn0032805	XLOC_003171	2L	FBtr0081276	1568.75	-0.00606757	0.267055	-0.0227203	0.981873	0.995478
CG10338	FBgn0032700	XLOC_001430	2L	FBtr0343108;FBtr0081096	7.03762	0.215476	0.604919	0.356207	0.721686	1
CG10341	FBgn0032701	XLOC_001431	2L	FBtr0343109;FBtr0081097	27.3726	1.16823	0.49955	2.33856	0.0193581	0.210212
CG10343	FBgn0032703	XLOC_001432	2L	FBtr0081098	11.4576	-0.425078	0.599716	-0.708798	0.47845	1
CG10344	FBgn0034729	XLOC_006576	2R	FBtr0071841;FBtr0071840	39.9387	0.0517459	0.476153	0.108675	0.91346	0.988562
CG10345	FBgn0027562	XLOC_013044	3R	FBtr0083360	2.2738	0.234232	0.504134	0.464623	0.642201	1
CG10347	FBgn0030342	XLOC_016200	X	FBtr0073602;FBtr0073603	3.67274	-0.325604	0.588798	-0.552997	0.580265	1
CG10348	FBgn0032707	XLOC_003103	2L	FBtr0343112;FBtr0301647	2.81665	0.666273	0.528226	1.26134	0.207186	1
CG10352	FBgn0030348	XLOC_016203	X	FBtr0331589	535.661	-0.928504	0.220189	-4.21685	2.4774e-05	0.00138355
CG10353	FBgn0030349	XLOC_016204	X	FBtr0344702;FBtr0308070;FBtr0344703;FBtr0331594;FBtr0331591;FBtr0114452;FBtr0114451	232.712	-0.710698	0.270478	-2.62757	0.00859983	0.124746
CG10357	FBgn0035453	XLOC_007105	3L	FBtr0300062	0.412693	0.246714	0.322651	0.764646	0.444482	1
CG10359	FBgn0035452	XLOC_007104	3L	FBtr0290290;FBtr0273204	2.00743	-0.0713704	0.463244	-0.154067	0.877557	1
CG10361	FBgn0036208	XLOC_009341	3L	FBtr0076084	2.40769	0.833268	0.506705	1.64448	0.100076	1
CG10362	FBgn0030358	XLOC_016211	X	FBtr0073590	13.7744	-0.339155	0.566018	-0.599195	0.549043	1
CG10365	FBgn0039109	XLOC_011519	3R	FBtr0084449;FBtr0084446;FBtr0084447;FBtr0084448	30.4907	-0.630693	0.448047	-1.40765	0.159235	0.609436
CG10366	FBgn0032814	XLOC_001514	2L	FBtr0081259	1.9923	-0.084762	0.510863	-0.165919	0.86822	1
CG10375	FBgn0039116	XLOC_011524	3R	FBtr0300681;FBtr0084458	47.562	-0.26861	0.39988	-0.671727	0.501758	0.881383
CG10376	FBgn0032702	XLOC_003099	2L	FBtr0081128	322.102	0.745887	0.597581	1.24818	0.211966	0.66908
CG10383	FBgn0032699	XLOC_003098	2L	FBtr0089628;FBtr0343117	11.386	-0.303928	0.579548	-0.524423	0.599984	1
CG10395	FBgn0033019	XLOC_003422	2R	FBtr0347210;FBtr0347209	6.04014	0.490448	0.604347	0.811533	0.41706	1
CG10396	FBgn0033020	XLOC_003423	2R	FBtr0335260;FBtr0086089	1.7028	0.276392	0.471867	0.585742	0.558049	1
CG10399	FBgn0031877	XLOC_000597	2L	FBtr0079351;FBtr0343774	5.33707	0.136725	0.604476	0.226187	0.821056	1
CG10405	FBgn0038431	XLOC_011036	3R	FBtr0110773	3.7759	-0.405819	0.591798	-0.685739	0.492878	1
CG10407	FBgn0038395	XLOC_013006	3R	FBtr0083237;FBtr0336487	0.26343	-0.205717	0.311207	-0.661028	0.508594	1
CG1041	FBgn0037440	XLOC_012290	3R	FBtr0110774;FBtr0344293;FBtr0081734;FBtr0347005	10.1671	0.317911	0.59022	0.538631	0.590141	1
CG10413	FBgn0032689	XLOC_003088	2L	FBtr0081080;FBtr0343829	16.0323	-0.250462	0.54998	-0.455402	0.64882	1
CG10417	FBgn0033021	XLOC_005147	2R	FBtr0086092;FBtr0086091	8.17026	0.0966543	0.601807	0.160607	0.872403	1
CG10418	FBgn0036277	XLOC_007707	3L	FBtr0075954	1.14812	0.198476	0.404734	0.490386	0.623861	1
CG10420	FBgn0039296	XLOC_013640	3R	FBtr0084870	1.91581	0.125336	0.488283	0.256688	0.79742	1
CG10424	FBgn0036848	XLOC_009840	3L	FBtr0075033	1.26884	-0.13577	0.41881	-0.32418	0.745802	1
CG10425	FBgn0039304	XLOC_013643	3R	FBtr0084867	22.6345	-0.184408	0.486883	-0.378752	0.704872	0.941763
CG10426	FBgn0036273	XLOC_007703	3L	FBtr0076007;FBtr0333356	1.94012	-0.283056	0.452106	-0.626083	0.531261	1
CG10428	FBgn0032724	XLOC_001447	2L	FBtr0081132	13.3513	0.394877	0.562512	0.701988	0.482686	1
CG10431	FBgn0032730	XLOC_001450	2L	FBtr0340317;FBtr0081134	391.695	0.504744	0.292791	1.7239	0.0847252	0.455055
CG10433	FBgn0034638	XLOC_006497	2R	FBtr0071691;FBtr0071690;FBtr0344882	19.5173	-1.38058	0.547786	-2.52029	0.0117258	0.156144
CG10435	FBgn0037539	XLOC_012410	3R	FBtr0081820	72.8852	-0.0741019	0.363027	-0.204122	0.838258	0.975723
CG10440	FBgn0034636	XLOC_006495	2R	FBtr0071692;FBtr0308642	4.75055	0.0680431	0.598482	0.113693	0.909481	1
CG10444	FBgn0034494	XLOC_006380	2R	FBtr0086305	17.5643	-0.0829829	0.527147	-0.157419	0.874915	1
CG10445	FBgn0037531	XLOC_012402	3R	FBtr0304704;FBtr0339711;FBtr0300685	5.91002	0.145233	0.605449	0.239877	0.810426	1
CG10462	FBgn0032815	XLOC_003182	2L	FBtr0331244;FBtr0100352;FBtr0331243;FBtr0305952;FBtr0100351;FBtr0081325	23.1377	-0.0664097	0.55705	-0.119217	0.905104	0.986541
CG10463	FBgn0032819	XLOC_001517	2L	FBtr0081290	2.49356	-0.035265	0.533991	-0.0660404	0.947346	1
CG10465	FBgn0033017	XLOC_005145	2R	FBtr0086094	7.69685	-0.691889	0.604662	-1.14426	0.252516	1
CG10466	FBgn0032822	XLOC_001518	2L	FBtr0332178;FBtr0081291	4.04221	-0.439062	0.590031	-0.744135	0.456795	1
CG10469;CG10467		XLOC_008928	3L	FBtr0077064;FBtr0077063	163.116	1.0812	0.39222	2.75663	0.00584008	0.0949754
CG10470	FBgn0032746	XLOC_001462	2L	FBtr0081146	39.7852	-0.429439	0.437914	-0.980648	0.326766	0.769863
CG10472	FBgn0035670	XLOC_008926	3L	FBtr0077066	372.479	-0.149841	0.331312	-0.452266	0.651078	0.932116
CG10477	FBgn0035661	XLOC_008924	3L	FBtr0077068;FBtr0346804	6.83197	0.326804	0.604336	0.540765	0.58867	1
CG10479	FBgn0035656	XLOC_008920	3L	FBtr0332041;FBtr0077070	1.42254	0.0611949	0.455539	0.134335	0.893138	1
CG10481	FBgn0032827	XLOC_003193	2L	FBtr0081312	3.24284	0.525314	0.561198	0.936058	0.349243	1
CG10483	FBgn0035649	XLOC_008917	3L	FBtr0077077	2.98425	0.239075	0.533576	0.448062	0.654109	1
CG10486	FBgn0035647	XLOC_008916	3L	FBtr0305273;FBtr0114644	0.813672	0.00936567	0.36477	0.0256756	0.979516	1
CG10492	FBgn0032748	XLOC_001464	2L	FBtr0113043;FBtr0081148	17.7485	0.599532	0.539639	1.11099	0.266573	1
CG10494	FBgn0034634	XLOC_006487	2R	FBtr0071699;FBtr0071700	62.8972	0.166593	0.379348	0.439156	0.660549	0.933856
CG10495	FBgn0032750	XLOC_001466	2L	FBtr0081150	3.02501	0.522391	0.542159	0.963538	0.335278	1
CG10505	FBgn0034612	XLOC_006470	2R	FBtr0071619	286.31	0.0585592	0.270606	0.2164	0.828676	0.973053
CG10508	FBgn0037060	XLOC_008315	3L	FBtr0331854;FBtr0307387;FBtr0307386;FBtr0307385	23.6534	0.127168	0.508996	0.249841	0.80271	0.965784
CG10510	FBgn0037059	XLOC_010017	3L	FBtr0078310	13.5336	0.679359	0.557007	1.21966	0.222593	1
CG10512	FBgn0037057	XLOC_008314	3L	FBtr0078297;FBtr0078300;FBtr0078298;FBtr0078299	6.54484	-0.548709	0.604264	-0.908061	0.363846	1
CG10513	FBgn0039311	XLOC_013646	3R	FBtr0114505	164.845	-0.430913	0.278311	-1.54831	0.121547	0.538522
CG10514	FBgn0039312	XLOC_013647	3R	FBtr0084864	69.3359	0.055181	0.368173	0.149878	0.880861	0.982684
CG10516	FBgn0036549	XLOC_007923	3L	FBtr0075512	5.38277	0.451827	0.571416	0.790715	0.429111	1
CG10527	FBgn0034583	XLOC_006451	2R	FBtr0071541	18.5869	-0.622604	0.549893	-1.13223	0.257538	0.714016
CG10543	FBgn0034570	XLOC_004726	2R	FBtr0332594;FBtr0071524;FBtr0332593;FBtr0303195	23.6779	-0.661918	0.489374	-1.35258	0.176189	0.629152
CG10550	FBgn0039321	XLOC_013652	3R	FBtr0305953;FBtr0084858;FBtr0084857	57.7025	-0.354663	0.409177	-0.866772	0.386067	0.815808
CG10553	FBgn0039324	XLOC_013656	3R	FBtr0084853	42.1551	0.547542	0.527129	1.03872	0.298933	0.750688
CG10555	FBgn0030034	XLOC_014767	X	FBtr0071174;FBtr0343353	40.361	0.295239	0.455624	0.647988	0.516993	0.885038
CG10559	FBgn0039323	XLOC_013655	3R	FBtr0289942	20.1072	0.722309	0.509555	1.41753	0.156328	0.607227
CG10560	FBgn0039325	XLOC_013657	3R	FBtr0084852	25.7834	0.967957	0.485812	1.99245	0.0463215	0.34352
CG10561	FBgn0002036	XLOC_001471	2L	FBtr0081155	22.456	-0.233575	0.494728	-0.472127	0.636836	0.927759
CG10562	FBgn0039326	XLOC_013658	3R	FBtr0084851	34.3983	-0.336544	0.445819	-0.754891	0.450314	0.855151
CG10565	FBgn0037051	XLOC_010012	3L	FBtr0078323;FBtr0305502	22.4653	0.133611	0.499032	0.26774	0.788899	0.961582
CG10566	FBgn0037050	XLOC_008309	3L	FBtr0078292;FBtr0305500	118.834	0.19276	0.301983	0.638315	0.523269	0.885074
CG10576	FBgn0035630	XLOC_008896	3L	FBtr0345606;FBtr0345901;FBtr0077121	72.4778	0.0317695	0.368492	0.0862149	0.931296	0.991052
CG10581	FBgn0037046	XLOC_010009	3L	FBtr0078326	3.46008	0.4499	0.588616	0.764334	0.444668	1
CG10584	FBgn0037045	XLOC_010008	3L	FBtr0078327	1.59047	0.319208	0.442947	0.720645	0.471128	1
CG10585	FBgn0037044	XLOC_008302	3L	FBtr0078287;FBtr0345136	15.2594	-0.297223	0.545302	-0.545062	0.585711	1
CG10587	FBgn0037039	XLOC_010001	3L	FBtr0339891;FBtr0333286;FBtr0078333	0.721762	-0.251635	0.334098	-0.753177	0.451343	1
CG10589	FBgn0037035	XLOC_008297	3L	FBtr0078266	48.5697	-0.328956	0.387447	-0.849034	0.395862	0.823702
CG10590	FBgn0035622	XLOC_008892	3L	FBtr0077127	11.109	-0.343499	0.59896	-0.573492	0.566312	1
CG10591	FBgn0035621	XLOC_008891	3L	FBtr0077128	0.26343	-0.205717	0.311207	-0.661028	0.508594	1
CG10592	FBgn0035619	XLOC_008890	3L	FBtr0077129	37.178	-0.85931	0.461812	-1.86074	0.0627814	0.403572
CG10600;CG31752		XLOC_003112	2L	FBtr0331194;FBtr0273228;FBtr0081120;FBtr0331193	71.7377	-0.466959	0.353963	-1.31923	0.187092	0.640771
CG10602;mRpL13		XLOC_003114	2L	FBtr0089315;FBtr0089314;FBtr0308069;FBtr0089318	21.4668	-0.603511	0.515755	-1.17015	0.241941	0.694989
CG10616	FBgn0036286	XLOC_007711	3L	FBtr0308896;FBtr0075956;FBtr0346569	6.4984	-0.511409	0.603218	-0.847802	0.396548	1
CG10621	FBgn0032726	XLOC_003120	2L	FBtr0342927;FBtr0342926;FBtr0081191	12.2829	-1.18472	0.581453	-2.03752	0.0415981	1
CG10623	FBgn0032727	XLOC_003121	2L	FBtr0344844;FBtr0081190;FBtr0344845	33.8949	-0.152077	0.465193	-0.326912	0.743734	0.95376
CG10625	FBgn0035612	XLOC_008885	3L	FBtr0113144;FBtr0273233;FBtr0077140;FBtr0273232;FBtr0077139;FBtr0273231;FBtr0077138;FBtr0077137;FBtr0273234;FBtr0113146	6.18859	-0.526934	0.585809	-0.899498	0.368387	1
CG10628	FBgn0032818	XLOC_003185	2L	FBtr0081323	10.7687	-0.130034	0.586716	-0.22163	0.824602	1
CG10631	FBgn0032817	XLOC_003184	2L	FBtr0081324	89.3741	1.33152	0.347703	3.82948	0.000128412	0.0052842
CG10635	FBgn0035603	XLOC_008876	3L	FBtr0077154	8.87453	0.523295	0.596732	0.876935	0.380522	1
CG10638	FBgn0036290	XLOC_009397	3L	FBtr0345350;FBtr0089321;FBtr0089322	19.3133	0.893839	0.5325	1.67857	0.0932357	0.472503
CG10639	FBgn0032729	XLOC_003123	2L	FBtr0340323;FBtr0340324;FBtr0081186	21.8013	0.085814	0.511041	0.16792	0.866646	0.979956
CG10646	FBgn0036292	XLOC_009398	3L	FBtr0075972	21.1017	-0.311149	0.528563	-0.58867	0.556083	0.897608
CG10650	FBgn0046302	XLOC_003126	2L	FBtr0340320;FBtr0081183	91.5716	-0.78763	0.373783	-2.10719	0.0351014	0.295874
CG10651	FBgn0032853	XLOC_003217	2L	FBtr0345683;FBtr0081378	0.442345	0.244242	0.321051	0.760758	0.446802	1
CG10654	FBgn0036294	XLOC_009399	3L	FBtr0332644;FBtr0075971	200.291	0.370795	0.282542	1.31236	0.1894	0.643201
CG10657	FBgn0036289	XLOC_009396	3L	FBtr0075975	56.298	0.713673	0.423426	1.68547	0.0918974	0.470407
CG10659	FBgn0032839	XLOC_003206	2L	FBtr0081350	3.6015	-0.311312	0.568812	-0.547303	0.58417	1
CG10660	FBgn0036288	XLOC_009395	3L	FBtr0332645;FBtr0075976;FBtr0332647;FBtr0332646	33.7237	0.176214	0.458763	0.384107	0.700899	0.941763
CG10663	FBgn0036287	XLOC_009394	3L	FBtr0346570;FBtr0113167	11.5826	0.675221	0.57096	1.18261	0.236965	1
CG10669	FBgn0039329	XLOC_013661	3R	FBtr0300687;FBtr0084848	15.2227	0.180906	0.560739	0.32262	0.746983	1
CG10671	FBgn0035586	XLOC_008868	3L	FBtr0077178;FBtr0077177	196.18	0.00291766	0.326316	0.00894121	0.992866	0.997463
CG10672	FBgn0035588	XLOC_008866	3L	FBtr0077179	149.638	0.125437	0.304974	0.411303	0.68085	0.939361
CG10674	FBgn0035592	XLOC_008864	3L	FBtr0077181	9.08237	-0.0719079	0.605406	-0.118776	0.905453	1
CG10680	FBgn0032836	XLOC_001527	2L	FBtr0332182;FBtr0081303	10.6523	-0.294074	0.599762	-0.490319	0.623908	1
CG10681	FBgn0036291	XLOC_007716	3L	FBtr0332634;FBtr0075957	24.741	0.136236	0.491709	0.277067	0.781729	0.961223
CG10688	FBgn0036300	XLOC_007721	3L	FBtr0075961	15.7059	0.357717	0.570029	0.627541	0.530304	1
CG10694	FBgn0039147	XLOC_011547	3R	FBtr0084542	4.86912	0.567421	0.5885	0.964182	0.334955	1
CG10700	FBgn0032754	XLOC_003138	2L	FBtr0081171	1.2514	0.414866	0.399985	1.0372	0.299641	1
CG10702	FBgn0032752	XLOC_003135	2L	FBtr0303241;FBtr0081176;FBtr0081175;FBtr0081174	103.74	0.220779	0.317264	0.695886	0.4865	0.8747
CG10710	FBgn0036377	XLOC_009474	3L	FBtr0075817	20.1196	-0.0986005	0.544296	-0.181152	0.856248	0.978208
CG10713	FBgn0036360	XLOC_009465	3L	FBtr0075855	2.40769	0.833268	0.506705	1.64448	0.100076	1
CG10721	FBgn0032846	XLOC_001533	2L	FBtr0331615;FBtr0081333	37.4038	-0.464825	0.460671	-1.00902	0.312966	0.763307
CG10725	FBgn0036362	XLOC_007790	3L	FBtr0089323	5.84856	0.233897	0.597945	0.391168	0.695673	1
CG10730	FBgn0032843	XLOC_003210	2L	FBtr0343848	73.3129	0.384651	0.396447	0.970245	0.331924	0.773436
CG10731	FBgn0034081	XLOC_005968	2R	FBtr0344527;FBtr0345647	3.87973	-0.476287	0.59241	-0.803982	0.421407	1
CG10732	FBgn0036365	XLOC_007792	3L	FBtr0331534;FBtr0331533;FBtr0075851;FBtr0075852	21.1574	0.259401	0.507281	0.511355	0.609102	0.918099
CG10734	FBgn0034082	XLOC_005970	2R	FBtr0087250	110.879	0.72669	0.307182	2.36566	0.0179978	0.202677
CG10737	FBgn0034420	XLOC_004563	2R	FBtr0290312;FBtr0290316;FBtr0086586;FBtr0086585;FBtr0290314;FBtr0290313;FBtr0100282;FBtr0290318;FBtr0290311;FBtr0086588;FBtr0340452;FBtr0340453;FBtr0340451;FBtr0290317	34.7064	-0.235702	0.466084	-0.505708	0.613062	0.919003
CG10738	FBgn0036368	XLOC_007793	3L	FBtr0304791;FBtr0304792;FBtr0302488;FBtr0302487	2.91345	-0.0876627	0.532746	-0.164549	0.869299	1
CG1074	FBgn0037250	XLOC_010186	3R	FBtr0078925	9.31305	1.51325	0.605026	2.50113	0.0123798	1
CG10747	FBgn0032845	XLOC_003213	2L	FBtr0081341;FBtr0331618	5.8072	0.0543884	0.605194	0.0898694	0.928391	1
CG10748	FBgn0036327	XLOC_009426	3L	FBtr0075900	1.61764	-0.585897	0.463421	-1.26429	0.206127	1
CG10749	FBgn0036328	XLOC_007744	3L	FBtr0075871	0.993697	-0.416073	0.410232	-1.01424	0.310469	1
CG10752	FBgn0036325	XLOC_009424	3L	FBtr0075903	4.32349	0.758576	0.579601	1.30879	0.190606	1
CG10754	FBgn0036314	XLOC_009415	3L	FBtr0075944	7.87114	-0.447367	0.600796	-0.744623	0.456499	1
CG10761	FBgn0030015	XLOC_015993	X	FBtr0071187	3.2191	-0.197674	0.570266	-0.346635	0.728866	1
CG10764	FBgn0034221	XLOC_004378	2R	FBtr0086919	3.00923	0.327977	0.579009	0.566445	0.571091	1
CG1077	FBgn0037405	XLOC_010285	3R	FBtr0078587	2.37087	-0.662139	0.479497	-1.3809		1
CG10777	FBgn0029979	XLOC_015972	X	FBtr0071132;FBtr0344137	42.9856	0.0867359	0.43395	0.199875	0.841578	0.97627
CG10778	FBgn0029980	XLOC_015973	X	FBtr0071131;FBtr0331433	1.40232	-0.2572	0.461143	-0.557744	0.577019	1
CG10793	FBgn0029656	XLOC_015730	X	FBtr0070536	97.026	0.799846	0.320063	2.49902	0.0124536	0.161896
CG10795	FBgn0034626	XLOC_006482	2R	FBtr0071609	2.83393	-0.371226	0.562418	-0.660054	0.509219	1
CG10799	FBgn0033821	XLOC_004042	2R	FBtr0087748	6.04481	-0.441866	0.60517	-0.730151	0.465298	1
CG10802	FBgn0029664	XLOC_014500	X	FBtr0331609;FBtr0070568	2.3743	0.548588	0.509174	1.07741	0.281298	1
CG10803	FBgn0029666	XLOC_014501	X	FBtr0331611;FBtr0331610;FBtr0070569;FBtr0332285;FBtr0331612	2.97913	-0.178886	0.57236	-0.312541	0.754629	1
CG10804	FBgn0029663	XLOC_015737	X	FBtr0344077;FBtr0114487;FBtr0070592;FBtr0070591	162.457	0.0377657	0.284161	0.132903	0.89427	0.986351
CG10809	FBgn0036052	XLOC_009208	3L	FBtr0300688;FBtr0076366	11.2079	-0.511624	0.584179	-0.8758	0.381139	1
CG10814	FBgn0033830	XLOC_005765	2R	FBtr0087720	0.680562	0.0298504	0.339682	0.0878774	0.929974	1
CG10822	FBgn0034478	XLOC_004635	2R	FBtr0086339	0.400979	-0.226108	0.3219	-0.702416	0.482419	1
CG10824	FBgn0038865	XLOC_013331	3R	FBtr0084028	471.113	0.16059	0.225758	0.711339	0.476874	0.869109
CG10827	FBgn0038845	XLOC_013312	3R	FBtr0084048	216.985	0.392309	0.270284	1.45147	0.146649	0.584567
CG10830	FBgn0038839	XLOC_013307	3R	FBtr0083986	1.90962	-0.0123795	0.482719	-0.0256455	0.97954	1
CG10841	FBgn0038163	XLOC_010846	3R	FBtr0309093;FBtr0082795	21.24	0.561811	0.501762	1.11968	0.262852	0.720457
CG10859	FBgn0032520	XLOC_002779	2L	FBtr0342635;FBtr0080522	0.88469	0.318139	0.360214	0.883193	0.377132	1
CG10862	FBgn0035455	XLOC_008759	3L	FBtr0073139	10.3864	-0.0258555	0.58177	-0.0444428	0.964551	1
CG10863	FBgn0027552	XLOC_008779	3L	FBtr0073171	17.0222	-0.34344	0.532372	-0.645112	0.518855	1
CG10866	FBgn0035475	XLOC_008777	3L	FBtr0345342;FBtr0073173	9.23397	0.11505	0.588298	0.195564	0.844951	1
CG10869	FBgn0031347	XLOC_001861	2L	FBtr0077917	6.02556	-0.370686	0.604606	-0.613103	0.539808	1
CG10874	FBgn0031395	XLOC_001907	2L	FBtr0308189;FBtr0330664;FBtr0077849;FBtr0077848	7.11533	-0.828551	0.605328	-1.36876	0.171073	1
CG10877	FBgn0038804	XLOC_013277	3R	FBtr0083950	72.5844	0.548406	0.399587	1.37243	0.169929	0.62606
CG10880	FBgn0031398	XLOC_001913	2L	FBtr0330675;FBtr0077843	31.1862	-0.383667	0.55263	-0.694256	0.487522	0.874848
CG10881	FBgn0038796	XLOC_011290	3R	FBtr0083885	0.442345	0.244242	0.321051	0.760758	0.446802	1
CG10887	FBgn0038773	XLOC_011279	3R	FBtr0083864	0.761496	-0.246955	0.332224	-0.743339	0.457276	1
CG10889	FBgn0038769	XLOC_013256	3R	FBtr0083839	76.207	0.303178	0.388201	0.780983	0.434813	0.845427
CG10898	FBgn0037911	XLOC_010683	3R	FBtr0082410	533.31	-0.186287	0.284631	-0.654487	0.512798	0.885038
CG10899	FBgn0039235	XLOC_013609	3R	FBtr0308616;FBtr0084732	1.97934	-0.163471	0.503933	-0.32439	0.745643	1
CG1090	FBgn0037238	XLOC_010175	3R	FBtr0335202;FBtr0335203;FBtr0335201;FBtr0332449	11.1997	-0.41102	0.596146	-0.689462	0.490533	1
CG10903	FBgn0037543	XLOC_010425	3R	FBtr0310411;FBtr0081787	45.1356	0.49701	0.410123	1.21186	0.225567	0.682436
CG10904	FBgn0034945	XLOC_006731	2R	FBtr0343289;FBtr0072205	26.8554	-0.452647	0.465508	-0.972374	0.330865	0.773436
CG10907	FBgn0036207	XLOC_007661	3L	FBtr0076029	1.40278	0.318956	0.45691	0.698073	0.485132	1
CG10909	FBgn0038090	XLOC_012782	3R	FBtr0082685	0.26343	-0.205717	0.311207	-0.661028	0.508594	1
CG1091	FBgn0037470	XLOC_012336	3R	FBtr0081641;FBtr0333326;FBtr0081640	50.2493	0.00375934	0.434215	0.00865777	0.993092	0.997466
CG10910	FBgn0034289	XLOC_004455	2R	FBtr0089630	83.9871	-2.66133	0.427999	-6.21808	5.03291e-10	1.05943e-07
CG10911	FBgn0034295	XLOC_006139	2R	FBtr0086808	105.844	-0.47572	0.369082	-1.28893	0.197423	0.654053
CG10912	FBgn0034296	XLOC_006140	2R	FBtr0086807	31.6865	-0.361874	0.470452	-0.769205	0.441772	0.85173
CG10914	FBgn0034307	XLOC_004470	2R	FBtr0086745	0.843324	0.00664832	0.36676	0.0181272	0.985537	1
CG10915	FBgn0034308	XLOC_004471	2R	FBtr0086746;FBtr0345416	20.6354	0.313648	0.539048	0.581855	0.560664	0.898277
CG10916	FBgn0034312	XLOC_004474	2R	FBtr0332853	52.2788	0.313307	0.467306	0.670455	0.502568	0.881398
CG10918	FBgn0031178	XLOC_016820	X	FBtr0077218	0.26343	-0.205717	0.311207	-0.661028	0.508594	1
CG10919	FBgn0037514	XLOC_010408	3R	FBtr0081739	0.442345	0.244242	0.321051	0.760758	0.446802	1
CG1092	FBgn0037228	XLOC_010167	3R	FBtr0336480;FBtr0336481	0.722213	0.271785	0.337575	0.805111	0.420756	1
CG10924	FBgn0034356	XLOC_004518	2R	FBtr0086699;FBtr0113093	21.5834	-0.050788	0.520548	-0.0975664	0.922277	0.990356
CG10927	FBgn0034360	XLOC_004521	2R	FBtr0086705	15.0826	-0.425244	0.544488	-0.780998	0.434804	1
CG10931	FBgn0034274	XLOC_004436	2R	FBtr0089545	4.35253	0.945997	0.600628	1.57501	0.115254	1
CG10932	FBgn0029969	XLOC_015965	X	FBtr0345982;FBtr0071143	21.2807	0.0547571	0.509385	0.107497	0.914395	0.988562
CG10934;CG10933		XLOC_004431	2R	FBtr0086859;FBtr0086860	30.3203	-0.166416	0.482306	-0.345043	0.730062	0.950887
CG10936	FBgn0034253	XLOC_006102	2R	FBtr0086895	5.5637	-0.294529	0.601061	-0.490014	0.624124	1
CG10943	FBgn0036320	XLOC_009419	3L	FBtr0075936	7.66382	-0.407633	0.605422	-0.673303	0.500755	1
CG10947	FBgn0032857	XLOC_003227	2L	FBtr0081369;FBtr0336750;FBtr0081370	1.10675	-0.100387	0.432365	-0.23218	0.816398	1
CG10948	FBgn0036317	XLOC_009417	3L	FBtr0273237;FBtr0075939;FBtr0075938	14.246	-0.115947	0.585404	-0.198064	0.842995	1
CG10949	FBgn0032858	XLOC_003228	2L	FBtr0081367;FBtr0346417	3.2304	-0.468068	0.56711	-0.825356	0.409169	1
CG10958	FBgn0030004	XLOC_014752	X	FBtr0071153	30.5098	0.53318	0.465725	1.14484	0.252275	0.709014
CG10959	FBgn0030010	XLOC_014756	X	FBtr0331614;FBtr0071157	4.2227	-0.182375	0.599943	-0.303987	0.761138	1
CG10960	FBgn0036316	XLOC_009416	3L	FBtr0075943;FBtr0075942;FBtr0075941	20.8878	-0.160978	0.542437	-0.296769	0.766643	0.959161
CG10962;CR43836		XLOC_016034	X	FBtr0071263;FBtr0332280;FBtr0332279;FBtr0332281	145.093	0.548501	0.283052	1.93781	0.0526463	0.372042
CG10969	FBgn0036310	XLOC_009413	3L	FBtr0075946	2.94468	-0.0592689	0.524084	-0.113091	0.909959	1
CG10970;CG44325		XLOC_016038	X	FBtr0346175;FBtr0340356;FBtr0340357;FBtr0339660;FBtr0339661;FBtr0339659	17.4164	0.177711	0.557638	0.318685	0.749966	1
CG10973	FBgn0036306	XLOC_009410	3L	FBtr0100354	22.3403	0.549368	0.493211	1.11386	0.265339	0.722129
CG10979	FBgn0037379	XLOC_010267	3R	FBtr0078631;FBtr0335518	6.9765	0.175414	0.605402	0.289748	0.772009	1
CG10984	FBgn0036305	XLOC_007732	3L	FBtr0075919;FBtr0331554;FBtr0075921;FBtr0075920	88.2642	0.0405488	0.329623	0.123016	0.902095	0.986409
CG10993	FBgn0030524	XLOC_016298	X	FBtr0073837	40.6733	-1.13039	0.428888	-2.63562	0.00839839	0.122899
CG10996	FBgn0030525	XLOC_016299	X	FBtr0073836	46.1188	-1.39938	0.431967	-3.23956	0.00119715	0.0306168
CG11000	FBgn0263353	XLOC_010268	3R	FBtr0113195;FBtr0308953	7.32552	-0.648403	0.604051	-1.07342	0.283081	1
CG11018	FBgn0034464	XLOC_004614	2R	FBtr0086472	2.43739	-0.287496	0.539674	-0.532721	0.594227	1
CG11023	FBgn0031208	XLOC_000049	2L	FBtr0330654;FBtr0300690;FBtr0300689	672.263	0.0937039	0.23448	0.399624	0.689434	0.939361
CG11029	FBgn0031735	XLOC_000498	2L	FBtr0079136	2.17396	-0.206205	0.528567	-0.39012	0.696448	1
CG1103	FBgn0037235	XLOC_010174	3R	FBtr0078909;FBtr0111220	1.26884	-0.13577	0.41881	-0.32418	0.745802	1
CG11030	FBgn0031736	XLOC_000497	2L	FBtr0079135;FBtr0332554	6.11185	0.40795	0.605038	0.674255	0.500149	1
CG11034	FBgn0031741	XLOC_000502	2L	FBtr0344769;FBtr0306841;FBtr0342609	27.0813	0.0180257	0.506784	0.0355688	0.971626	0.99272
CG11035	FBgn0037544	XLOC_012413	3R	FBtr0081816	4.06056	0.358446	0.582369	0.615496	0.538227	1
CG1104	FBgn0037467	XLOC_012333	3R	FBtr0305316;FBtr0081643	23.4892	-0.268783	0.495721	-0.542206	0.587676	0.906836
CG11041	FBgn0034481	XLOC_004648	2R	FBtr0300692	0.26343	-0.205717	0.311207	-0.661028	0.508594	1
CG11043	FBgn0031831	XLOC_000568	2L	FBtr0079289	14.7546	0.172701	0.549811	0.314109	0.753438	1
CG1105	FBgn0037465	XLOC_012332	3R	FBtr0081645	7.78464	-0.556824	0.605309	-0.919901	0.357625	1
CG11050	FBgn0031836	XLOC_000570	2L	FBtr0079291;FBtr0079292;FBtr0079293	75.9617	0.389041	0.434017	0.896372	0.370054	0.80497
CG11052	FBgn0040524	XLOC_012409	3R	FBtr0335231;FBtr0081821;FBtr0308078;FBtr0308077	0.664409	-0.289121	0.355308	-0.81372	0.415805	1
CG11060	FBgn0033149	XLOC_003526	2R	FBtr0089045	0.412693	0.246714	0.322651	0.764646	0.444482	1
CG11068	FBgn0030536	XLOC_015084	X	FBtr0073854	25.8837	0.523088	0.476963	1.0967	0.272771	0.730762
CG11070	FBgn0028467	XLOC_000574	2L	FBtr0079297	1.5356	0.410333	0.493959	0.830703	0.406141	1
CG11073	FBgn0034693	XLOC_006546	2R	FBtr0336636;FBtr0336638;FBtr0336637;FBtr0300693;FBtr0071797	1.9923	-0.084762	0.510863	-0.165919	0.86822	1
CG11076	FBgn0039929	XLOC_014206	4	FBtr0089221;FBtr0344705;FBtr0344706	27.7546	0.000681243	0.491015	0.00138742	0.998893	0.999579
CG11077	FBgn0039930	XLOC_014205	4	FBtr0089222	89.3708	-1.02474	0.364451	-2.81174	0.00492737	0.0845375
CG1109	FBgn0046222	XLOC_010256	3R	FBtr0078714;FBtr0078713	17.0003	0.748398	0.537216	1.3931	0.163588	1
CG11095	FBgn0030528	XLOC_015082	X	FBtr0073827	65.8546	-0.280135	0.371114	-0.754849	0.450339	0.855151
CG11099	FBgn0034485	XLOC_004655	2R	FBtr0086315;FBtr0342673	2.43229	0.947206	0.524954	1.80436	0.0711745	1
CG11103	FBgn0030522	XLOC_015080	X	FBtr0100218	0.676123	0.0592407	0.342909	0.172759	0.862841	1
CG11106	FBgn0030280	XLOC_014917	X	FBtr0073446;FBtr0343040	0.26343	-0.205717	0.311207	-0.661028	0.508594	1
CG11107	FBgn0033160	XLOC_003536	2R	FBtr0088966;FBtr0336909	6.09468	-0.252381	0.605431	-0.416861	0.67678	1
CG11109	FBgn0037200	XLOC_008450	3L	FBtr0078552;FBtr0078553	10.7124	0.636099	0.580945	1.09494	0.273543	1
CG11110	FBgn0034535	XLOC_004697	2R	FBtr0086231	24.7173	0.199964	0.489249	0.408716	0.682748	0.939361
CG11112	FBgn0033164	XLOC_003538	2R	FBtr0113047	25.2783	0.811598	0.514748	1.57669	0.114866	0.528973
CG11113	FBgn0033165	XLOC_003539	2R	FBtr0113048	25.1434	0.78872	0.481165	1.63919	0.101174	0.495029
CG11122	FBgn0030266	XLOC_016153	X	FBtr0073481	54.0788	0.402765	0.401248	1.00378	0.315484	0.763662
CG11123;sPLA2		XLOC_003543	2R	FBtr0088971;FBtr0100138;FBtr0088973;FBtr0088972	12.9032	-0.438667	0.58499	-0.749871	0.453333	1
CG11125	FBgn0033174	XLOC_003544	2R	FBtr0088974;FBtr0336911	1712.92	-0.173201	0.217343	-0.7969	0.425509	0.840422
CG11127	FBgn0033178	XLOC_003546	2R	FBtr0088975	17.8949	-0.294584	0.534685	-0.550949	0.581669	1
CG1113	FBgn0037304	XLOC_010221	3R	FBtr0332428;FBtr0078779	9.00673	0.472634	0.590527	0.80036	0.423502	1
CG11131	FBgn0037204	XLOC_008454	3L	FBtr0332052;FBtr0078558	0.985643	0.165032	0.389834	0.423338	0.672048	1
CG11134	FBgn0030518	XLOC_015073	X	FBtr0331708;FBtr0073818	23.5254	0.178492	0.531509	0.335822	0.737005	0.952745
CG11137	FBgn0037199	XLOC_010119	3L	FBtr0347060;FBtr0078577	112.377	-0.422849	0.321471	-1.31536	0.18839	0.64175
CG11138	FBgn0030400	XLOC_016235	X	FBtr0331718;FBtr0073662;FBtr0273245	160.391	0.536269	0.304945	1.75858	0.0786496	0.447548
CG11141	FBgn0033177	XLOC_005266	2R	FBtr0345799;FBtr0088999;FBtr0088998	4.60065	-0.370364	0.58247	-0.635852	0.524873	1
CG11145	FBgn0033168	XLOC_005260	2R	FBtr0089004	1.73973	0.71032	0.482982	1.4707	0.141373	1
CG11147	FBgn0031734	XLOC_002187	2L	FBtr0079166;FBtr0079165	53.514	0.509762	0.421958	1.20809	0.227013	0.683561
CG11148	FBgn0039936	XLOC_014198	4	FBtr0300886;FBtr0300885;FBtr0300884;FBtr0300882	31.1353	0.431131	0.474444	0.908708	0.363504	0.799241
CG11149	FBgn0031732	XLOC_002185	2L	FBtr0332556;FBtr0300695;FBtr0079169;FBtr0300696;FBtr0079168	12.3801	-0.345519	0.564315	-0.61228	0.540352	1
CG11151	FBgn0030519	XLOC_015074	X	FBtr0073819;FBtr0331719	87.7545	-0.546709	0.369655	-1.47897	0.139148	0.572168
CG11155	FBgn0039927	XLOC_014156	4	FBtr0089194;FBtr0089195;FBtr0333701	64.1032	1.17627	0.381405	3.08404	0.00204211	0.0457254
CG11158	FBgn0030511	XLOC_015070	X	FBtr0073812	94.8416	0.39698	0.375858	1.05619	0.290879	0.750688
CG11159	FBgn0034539	XLOC_006417	2R	FBtr0086248	12.5887	0.382011	0.579582	0.659115	0.509822	1
CG1116	FBgn0037297	XLOC_010216	3R	FBtr0334907;FBtr0078775;FBtr0078774	29.0877	0.140755	0.4623	0.304467	0.760772	0.95812
CG11160	FBgn0030257	XLOC_014901	X	FBtr0331720;FBtr0073391;FBtr0073390	1.31493	0.0446721	0.422785	0.105662	0.915851	1
CG11162	FBgn0030509	XLOC_015069	X	FBtr0073811	2.12815	-0.4286	0.51533	-0.831701	0.405578	1
CG11164	FBgn0030507	XLOC_015067	X	FBtr0073809;FBtr0340397	0.442345	0.244242	0.321051	0.760758	0.446802	1
CG11165;CG30378		XLOC_003586	2R	FBtr0088853;FBtr0088854	146.104	0.233577	0.291246	0.80199	0.422559	0.838937
CG11168	FBgn0039249	XLOC_011633	3R	FBtr0306089;FBtr0084715;FBtr0337010;FBtr0337009	9.5162	-0.257004	0.600896	-0.427701	0.668869	1
CG11170	FBgn0034705	XLOC_006553	2R	FBtr0342983;FBtr0342982;FBtr0071786	6.73269	-0.444714	0.604269	-0.735953	0.461759	1
CG11178	FBgn0030499	XLOC_015063	X	FBtr0345128;FBtr0073805	102.809	-0.0373274	0.339846	-0.109836	0.912539	0.988193
CG11180	FBgn0034528	XLOC_006412	2R	FBtr0342722;FBtr0086254	57.1965	-0.259251	0.430067	-0.602816	0.546631	0.895802
CG11190	FBgn0030035	XLOC_016003	X	FBtr0071175	10.5277	-0.174969	0.58442	-0.299389	0.764643	1
CG11192	FBgn0034507	XLOC_006388	2R	FBtr0290122	1.51945	0.0728714	0.499514	0.145885	0.884012	1
CG11200	FBgn0034500	XLOC_006385	2R	FBtr0086300;FBtr0344185;FBtr0086299	10.7889	0.269567	0.588576	0.457998	0.646954	1
CG11208	FBgn0034488	XLOC_006373	2R	FBtr0086322	24.6762	-0.743583	0.512597	-1.45062	0.146886	0.585085
CG11210	FBgn0033259	XLOC_003601	2R	FBtr0088781	17.8795	-0.258369	0.52441	-0.492686	0.622235	1
CG11211	FBgn0033067	XLOC_005183	2R	FBtr0086005	0.592718	-0.244268	0.330703	-0.738634	0.460129	1
CG11221	FBgn0031855	XLOC_000579	2L	FBtr0079303;FBtr0339237	0.761496	-0.246955	0.332224	-0.743339	0.457276	1
CG11226	FBgn0037195	XLOC_008442	3L	FBtr0078546	59.4962	0.265033	0.404315	0.655512	0.512138	0.885038
CG11227	FBgn0031139	XLOC_016778	X	FBtr0077275;FBtr0077274;FBtr0077273	9.37881	-1.70805	0.604064	-2.82759	0.00468997	1
CG11231	FBgn0039939	XLOC_014141	4	FBtr0089242	9.53281	0.29428	0.592154	0.496965	0.619213	1
CG11236	FBgn0031860	XLOC_000584	2L	FBtr0309812;FBtr0079339	1.08154	-0.143504	0.428758	-0.334696	0.737854	1
CG1124	FBgn0037290	XLOC_010210	3R	FBtr0078841	1.84467	-0.0924707	0.509662	-0.181435	0.856026	1
CG11241	FBgn0037186	XLOC_010112	3L	FBtr0347061;FBtr0113188;FBtr0078536	119.563	0.380633	0.384676	0.98949	0.322423	0.767225
CG11247	FBgn0037120	XLOC_010061	3L	FBtr0332769;FBtr0113184;FBtr0078458;FBtr0078459	0.985643	0.165032	0.389834	0.423338	0.672048	1
CG11248	FBgn0037117	XLOC_008366	3L	FBtr0333967;FBtr0078431;FBtr0078430	0.592718	-0.244268	0.330703	-0.738634	0.460129	1
CG11249	FBgn0037115	XLOC_008364	3L	FBtr0078429	57.4079	-0.0200573	0.420521	-0.0476963	0.961958	0.992471
CG11257	FBgn0034442	XLOC_004582	2R	FBtr0086525	44.1117	-0.482117	0.405443	-1.18911	0.234395	0.688293
CG1126	FBgn0037280	XLOC_010204	3R	FBtr0078872	7.31967	0.272014	0.605329	0.449365	0.653168	1
CG11261	FBgn0036332	XLOC_009427	3L	FBtr0075899	3.83017	0.5321	0.581512	0.915028	0.360177	1
CG11263	FBgn0036330	XLOC_007746	3L	FBtr0300699;FBtr0075873	0.442345	0.244242	0.321051	0.760758	0.446802	1
CG11267	FBgn0036334	XLOC_007748	3L	FBtr0075875	7.72369	0.0298553	0.604509	0.0493878	0.96061	1
CG11269	FBgn0034700	XLOC_004822	2R	FBtr0071765	6.20371	1.67107	0.587857	2.84264	0.00447415	1
CG11275	FBgn0034706	XLOC_004825	2R	FBtr0071769	15.8455	-0.74934	0.560843	-1.3361	0.181517	1
CG11279	FBgn0036342	XLOC_007760	3L	FBtr0332077;FBtr0345366;FBtr0075887	1.28567	0.142544	0.416234	0.342462	0.732003	1
CG11284	FBgn0030056	XLOC_014784	X	FBtr0345984;FBtr0331731;FBtr0071222;FBtr0331730;FBtr0331729	55.5279	-0.129024	0.380682	-0.338928	0.734664	0.951897
CG11286	FBgn0037516	XLOC_012388	3R	FBtr0306042;FBtr0081779	0.26343	-0.205717	0.311207	-0.661028	0.508594	1
CG11289	FBgn0031887	XLOC_000608	2L	FBtr0289952	2.43295	-0.254936	0.549388	-0.464036	0.642622	1
CG1129	FBgn0037279	XLOC_010203	3R	FBtr0345175;FBtr0078870;FBtr0078871;FBtr0345174	415.319	0.218574	0.248658	0.879011	0.379395	0.810791
CG11294	FBgn0030058	XLOC_016024	X	FBtr0331456;FBtr0071224	1.86489	0.219966	0.510552	0.430841	0.666584	1
CG11298	FBgn0034721	XLOC_004838	2R	FBtr0071819	1.02493	-0.393545	0.402349	-0.978119	0.328016	1
CG11300	FBgn0034901	XLOC_004962	2R	FBtr0072090	0.761496	-0.246955	0.332224	-0.743339	0.457276	1
CG11306	FBgn0037108	XLOC_008357	3L	FBtr0333392;FBtr0078422	32.8008	0.437218	0.509677	0.857834	0.390984	0.821127
CG11309	FBgn0037070	XLOC_010026	3L	FBtr0345883;FBtr0321283;FBtr0078407;FBtr0331798;FBtr0078406;FBtr0321282	34.5797	-0.438496	0.467259	-0.938443	0.348017	0.786345
CG11313	FBgn0039798	XLOC_014030	3R	FBtr0335452;FBtr0335451	0.442345	0.244242	0.321051	0.760758	0.446802	1
CG11317	FBgn0039816	XLOC_014053	3R	FBtr0334547;FBtr0085741	0.400979	-0.226108	0.3219	-0.702416	0.482419	1
CG11318	FBgn0039818	XLOC_014055	3R	FBtr0085739	13.6054	-0.477848	0.583834	-0.818465	0.413092	1
CG11319	FBgn0031835	XLOC_002262	2L	FBtr0343160;FBtr0089641;FBtr0343159	40.4939	0.568125	0.426834	1.33102	0.183182	0.636307
CG11320	FBgn0031837	XLOC_002263	2L	FBtr0113026	200.544	0.130473	0.284098	0.459253	0.646053	0.930421
CG11321	FBgn0031857	XLOC_002282	2L	FBtr0331221;FBtr0331216;FBtr0331220;FBtr0331218;FBtr0290295;FBtr0331217;FBtr0331219;FBtr0301972;FBtr0331222	13.4513	1.86096	0.603804	3.08206	0.00205574	1
CG11322	FBgn0031856	XLOC_002281	2L	FBtr0290242	2.22372	0.495345	0.485104	1.02111		1
CG11337	FBgn0039846	XLOC_014072	3R	FBtr0300881;FBtr0334553;FBtr0085812;FBtr0085811	256.028	0.452517	0.264412	1.71141	0.0870056	0.46097
CG11340	FBgn0039840	XLOC_014069	3R	FBtr0085766	16.7863	0.061266	0.563339	0.108755	0.913397	1
CG11342	FBgn0035537	XLOC_008819	3L	FBtr0073338	427.427	-0.207303	0.274269	-0.755837	0.449747	0.855151
CG11353	FBgn0035557	XLOC_007180	3L	FBtr0073309;FBtr0073308	16.5246	0.0412601	0.53463	0.0771751	0.938484	1
CG11356	FBgn0030375	XLOC_016225	X	FBtr0073635	0.26343	-0.205717	0.311207	-0.661028	0.508594	1
CG11357	FBgn0035558	XLOC_007181	3L	FBtr0304987;FBtr0113143;FBtr0073310;FBtr0113142	6.4249	-0.531706	0.605402	-0.878269	0.379798	1
CG1136	FBgn0035490	XLOC_007136	3L	FBtr0073203	2.28258	0.0955945	0.541352	0.176585	0.859835	1
CG11360	FBgn0039920	XLOC_014138	4	FBtr0310541;FBtr0310539;FBtr0310540;FBtr0089091	171.785	0.580212	0.339958	1.70671	0.0878753	0.462444
CG11362	FBgn0034737	XLOC_004853	2R	FBtr0071836	19.3566	0.628751	0.551742	1.13957	0.254464	0.710779
CG11367	FBgn0037185	XLOC_008435	3L	FBtr0078528	74.1716	0.874764	0.371182	2.3567	0.0184381	0.205105
CG11369	FBgn0029951	XLOC_014720	X	FBtr0071067	1.03506	-0.0598375	0.391768	-0.152737	0.878605	1
CG11370	FBgn0037181	XLOC_008432	3L	FBtr0330172;FBtr0078522	6.36246	0.234717	0.601751	0.390057	0.696494	1
CG11373	FBgn0040679	XLOC_012268	3R	FBtr0078657	1.46727	-0.17406	0.456155	-0.381582	0.702771	1
CG11374	FBgn0031214	XLOC_000054	2L	FBtr0306541	2.87237	0.363046	0.515084	0.704829	0.480917	1
CG11377	FBgn0031217	XLOC_000056	2L	FBtr0330636;FBtr0078104	35.7742	-0.00863339	0.432972	-0.0199398	0.984091	0.995661
CG11378	FBgn0040364	XLOC_014376	X	FBtr0310611;FBtr0070197;FBtr0345513	21.3296	-0.3554	0.546631	-0.650164	0.515586	0.885038
CG11379	FBgn0040362	XLOC_014377	X	FBtr0342727	2.28538	-0.21453	0.547592	-0.39177	0.695228	1
CG11380	FBgn0040359	XLOC_014380	X	FBtr0345506;FBtr0070201	2.92628	-0.266148	0.500224	-0.532058		1
CG11381	FBgn0029568	XLOC_014382	X	FBtr0070203	1.88424	-0.654621	0.480141	-1.36339	0.172759	1
CG11382	FBgn0040367	XLOC_014384	X	FBtr0342728;FBtr0070205	9.1652	0.0514918	0.587311	0.0876737	0.930136	1
CG11384	FBgn0040363	XLOC_015605	X	FBtr0070251	34.7231	0.506021	0.465074	1.08804	0.276576	0.734806
CG11388	FBgn0034959	XLOC_004999	2R	FBtr0072162	5.76219	0.892465	0.594571	1.50102	0.133349	1
CG1139	FBgn0035300	XLOC_006995	3L	FBtr0072845	4.93866	0.00267113	0.57578	0.00463914	0.996299	1
CG11391	FBgn0038732	XLOC_011253	3R	FBtr0083789	4.23524	0.0727555	0.553048	0.131554	0.895337	1
CG11395	FBgn0034200	XLOC_004359	2R	FBtr0086987;FBtr0345519	68.2867	-0.283976	0.419224	-0.677385	0.498161	0.880917
CG11396	FBgn0037022	XLOC_009981	3L	FBtr0078276	4.26081	0.382424	0.586762	0.651753	0.51456	1
CG11398	FBgn0040366	XLOC_015606	X	FBtr0345522;FBtr0070250	0.592718	-0.244268	0.330703	-0.738634	0.460129	1
CG11399	FBgn0037021	XLOC_009980	3L	FBtr0078277	134.35	-0.0562436	0.36516	-0.154025	0.87759	0.982026
CG11400	FBgn0034198	XLOC_004356	2R	FBtr0345517	16.546	-0.345878	0.556246	-0.621807	0.534069	1
CG11403	FBgn0026876	XLOC_015608	X	FBtr0070245	2.6687	-1.09124	0.554244	-1.96887	0.0489676	1
CG11404	FBgn0037169	XLOC_008415	3L	FBtr0331778;FBtr0078513	1.46727	-0.17406	0.456155	-0.381582	0.702771	1
CG11406	FBgn0034990	XLOC_006757	2R	FBtr0343437;FBtr0300874;FBtr0072276;FBtr0100169	78.3732	0.0506598	0.338567	0.14963	0.881056	0.982684
CG11407	FBgn0038733	XLOC_011254	3R	FBtr0083790	8.13047	-0.0458448	0.597876	-0.0766795	0.938878	1
CG11409	FBgn0024366	XLOC_015612	X	FBtr0070238;FBtr0342730	3.48253	-0.269932	0.574353	-0.469976	0.638372	1
CG11412	FBgn0024362	XLOC_014387	X	FBtr0070209;FBtr0310619	39.5762	0.259297	0.482947	0.536907	0.591332	0.908069
CG11413	FBgn0035022	XLOC_005057	2R	FBtr0072305	4.41472	-0.263149	0.598912	-0.439378	0.660387	1
CG11414	FBgn0035024	XLOC_005059	2R	FBtr0072307	9.54688	0.0181016	0.596387	0.0303521	0.975786	1
CG11417	FBgn0024364	XLOC_014389	X	FBtr0070212	16.8301	0.0409098	0.566834	0.0721725	0.942465	1
CG11418	FBgn0024360	XLOC_015613	X	FBtr0070237;FBtr0332288;FBtr0070236	79.9619	0.172247	0.389079	0.442704	0.65798	0.933856
CG1142	FBgn0037504	XLOC_012367	3R	FBtr0081559	2.78109	0.422702	0.527236	0.801731	0.422709	1
CG11423	FBgn0034251	XLOC_004403	2R	FBtr0086834	8.86101	-1.28568	0.604582	-2.12656	0.0334565	1
CG11425	FBgn0037167	XLOC_008411	3L	FBtr0078507	3.80748	-0.824357	0.511338	-1.61216	0.106928	1
CG11426	FBgn0037166	XLOC_008410	3L	FBtr0078506	14.7094	0.716484	0.548654	1.30589	0.191589	1
CG1143	FBgn0035359	XLOC_007029	3L	FBtr0072937;FBtr0333445	63.83	0.770707	0.395846	1.94699	0.0515364	0.367264
CG11436	FBgn0029713	XLOC_015782	X	FBtr0070699	7.12934	0.00890387	0.605028	0.0147164	0.988258	1
CG11438	FBgn0037164	XLOC_008408	3L	FBtr0345586	0.680562	0.0298504	0.339682	0.0878774	0.929974	1
CG11444	FBgn0029715	XLOC_015783	X	FBtr0070698;FBtr0343567	33.8696	0.246103	0.450624	0.546138	0.584971	0.906836
CG11447	FBgn0038737	XLOC_011261	3R	FBtr0083815	84.0034	-0.444016	0.355742	-1.24814	0.211981	0.66908
CG11448	FBgn0024985	XLOC_014394	X	FBtr0332292;FBtr0332291;FBtr0070225	20.7953	-0.541295	0.516226	-1.04856	0.29438	0.750688
CG11449	FBgn0037162	XLOC_008407	3L	FBtr0078503	1.32704	0.449453	0.412496	1.08959	0.275893	1
CG11453	FBgn0038734	XLOC_011255	3R	FBtr0083791	10.1587	0.895883	0.597845	1.49852	0.133998	1
CG11454	FBgn0031224	XLOC_000063	2L	FBtr0078116	8.21983	-0.83161	0.599603	-1.38693	0.165462	1
CG11455;CG3436		XLOC_000058	2L	FBtr0330639;FBtr0330638;FBtr0306542;FBtr0330642;FBtr0330641;FBtr0301887;FBtr0330640;FBtr0301886;FBtr0078118;FBtr0078117;FBtr0340650;FBtr0078119	84.805	-0.158502	0.334329	-0.474088	0.635437	0.92723
CG11456	FBgn0037031	XLOC_008291	3L	FBtr0333371;FBtr0300873;FBtr0078264	0.721762	-0.251635	0.334098	-0.753177	0.451343	1
CG11459	FBgn0037396	XLOC_012274	3R	FBtr0344315	2.21645	0.301764	0.53283	0.566343	0.571161	1
CG1146	FBgn0035346	XLOC_007019	3L	FBtr0072922;FBtr0072921;FBtr0072923;FBtr0344219	13.9371	0.129873	0.585991	0.22163	0.824602	1
CG11470	FBgn0039671	XLOC_013913	3R	FBtr0339895;FBtr0085471	0.400979	-0.226108	0.3219	-0.702416	0.482419	1
CG11475;CG11474		XLOC_006541	2R	FBtr0071803;FBtr0303766;FBtr0071802	78.6694	0.0186853	0.369189	0.0506117	0.959635	0.992471
CG11486	FBgn0035397	XLOC_007051	3L	FBtr0073002;FBtr0113130;FBtr0073003;FBtr0072999;FBtr0072991;FBtr0073000;FBtr0072998;FBtr0113131;FBtr0073001;FBtr0072992;FBtr0332113;FBtr0113129;FBtr0072993;FBtr0072994;FBtr0072995;FBtr0072996	42.6351	-0.422688	0.43238	-0.977585	0.32828	0.771436
CG11498	FBgn0039749	XLOC_013974	3R	FBtr0332535;FBtr0302562	87.9269	-0.962318	0.327656	-2.93698	0.00331429	0.062983
CG11504	FBgn0039733	XLOC_011998	3R	FBtr0085549;FBtr0085548;FBtr0085547	4.29794	0.0531748	0.585555	0.090811	0.927643	1
CG11505	FBgn0035424	XLOC_007074	3L	FBtr0073045;FBtr0308061;FBtr0073046	78.1659	0.119681	0.346774	0.345127	0.729999	0.950887
CG11509	FBgn0029584	XLOC_014403	X	FBtr0305287	15.7091	0.553454	0.538529	1.02771	0.304084	1
CG11523	FBgn0037156	XLOC_010089	3L	FBtr0078511	50.0898	-0.231789	0.424287	-0.546303	0.584858	0.906836
CG11529	FBgn0036264	XLOC_007701	3L	FBtr0076005	2.2389	-0.115747	0.500693	-0.231173	0.81718	1
CG11534	FBgn0046296	XLOC_007692	3L	FBtr0075995	6.80817	0.710176	0.601336	1.181	0.237604	1
CG11537	FBgn0035400	XLOC_008720	3L	FBtr0113132;FBtr0073116;FBtr0113133;FBtr0333894;FBtr0073117;FBtr0073115;FBtr0309235	38.4098	-0.245316	0.461198	-0.531909	0.594789	0.910269
CG11539	FBgn0039859	XLOC_014080	3R	FBtr0085868;FBtr0337033	40.9023	0.192292	0.465274	0.413288	0.679395	0.939105
CG11550	FBgn0039864	XLOC_014081	3R	FBtr0085867	6.32692	-0.201006	0.602028	-0.333881	0.738469	1
CG11555	FBgn0086856	XLOC_000074	2L	FBtr0343777;FBtr0078128	8.43905	-0.218623	0.598935	-0.365019	0.715097	1
CG11560	FBgn0036249	XLOC_007689	3L	FBtr0075993	3.96038	-0.709952	0.590635	-1.20201	0.229358	1
CG11562	FBgn0031247	XLOC_000076	2L	FBtr0078130	4.16288	0.175761	0.585145	0.300372	0.763894	1
CG11563	FBgn0039868	XLOC_012108	3R	FBtr0085831	5.26936	0.95715	0.595142	1.60827	0.107776	1
CG11576	FBgn0039882	XLOC_014100	3R	FBtr0085852	21.3239	0.0165706	0.502915	0.0329492	0.973715	0.992843
CG11577	FBgn0036847	XLOC_009839	3L	FBtr0075034	8.34045	-0.207346	0.59988	-0.345647	0.729608	1
CG11583	FBgn0035524	XLOC_008813	3L	FBtr0073242	34.1403	-0.260527	0.456032	-0.57129	0.567803	0.901736
CG11586	FBgn0035520	XLOC_008811	3L	FBtr0073243;FBtr0333568	306.209	-0.097907	0.237289	-0.412606	0.679895	0.939105
CG11590	FBgn0030545	XLOC_015107	X	FBtr0073899	1.8964	0.150044	0.455595	0.329335	0.741902	1
CG11593	FBgn0035488	XLOC_008785	3L	FBtr0332982;FBtr0114509	8.02404	-0.193542	0.60382	-0.320529	0.748567	1
CG11594	FBgn0035484	XLOC_008783	3L	FBtr0073284;FBtr0309791;FBtr0310046;FBtr0073283	209.717	-0.299411	0.28928	-1.03502	0.300659	0.750688
CG11596	FBgn0023522	XLOC_014422	X	FBtr0332588;FBtr0070318;FBtr0070319;FBtr0070320;FBtr0332587	11.7692	0.373066	0.59411	0.627941	0.530043	1
CG11601	FBgn0031244	XLOC_001784	2L	FBtr0343780;FBtr0343779;FBtr0078137	81.1018	0.626955	0.405554	1.54592	0.122124	0.538583
CG1161	FBgn0037313	XLOC_010224	3R	FBtr0335000;FBtr0078785	20.1682	0.172459	0.521245	0.330859	0.740751	0.952745
CG11617	FBgn0031232	XLOC_001775	2L	FBtr0308246;FBtr0078146	39.431	-0.387182	0.472829	-0.818863	0.412865	0.833429
CG11619	FBgn0036836	XLOC_009829	3L	FBtr0075046	0.761496	-0.246955	0.332224	-0.743339	0.457276	1
CG11626	FBgn0038705	XLOC_011237	3R	FBtr0113247	98.2516	-0.2254	0.378328	-0.595778	0.551323	0.897035
CG11630	FBgn0032964	XLOC_003354	2L	FBtr0085909	3.18606	-0.15611	0.546356	-0.285729	0.775086	1
CG11634	FBgn0032968	XLOC_001727	2L	FBtr0085930;FBtr0343880	0.26343	-0.205717	0.311207	-0.661028	0.508594	1
CG11635	FBgn0033283	XLOC_003625	2R	FBtr0088739	0.412693	0.246714	0.322651	0.764646	0.444482	1
CG11638;CG32814		XLOC_015600	X	FBtr0070183;FBtr0336688	2.92517	0.128239	0.531254	0.241389	0.809253	1
CG11652	FBgn0036194	XLOC_009330	3L	FBtr0332766;FBtr0076131;FBtr0076130	6.86985	0.366584	0.604784	0.606141	0.544421	1
CG11655	FBgn0030638	XLOC_015155	X	FBtr0074031	5.29479	-0.912228	0.591778	-1.5415	0.123194	1
CG11656	FBgn0038109	XLOC_010804	3R	FBtr0082698	150.729	-1.12151	0.300135	-3.73669	0.000186455	0.00695677
CG11658	FBgn0036196	XLOC_009332	3L	FBtr0076126;FBtr0076125;FBtr0076128;FBtr0076127;FBtr0076124	35.0604	-0.417503	0.438628	-0.951837	0.341179	0.779981
CG11659	FBgn0038731	XLOC_013235	3R	FBtr0083797	1.65238	0.21014	0.441083	0.476418	0.633776	1
CG11663	FBgn0029539	XLOC_014362	X	FBtr0070164;FBtr0310165	0.721762	-0.251635	0.334098	-0.753177	0.451343	1
CG11664	FBgn0040341	XLOC_014361	X	FBtr0070163	2.80872	-0.400381	0.557233	-0.718515	0.47244	1
CG11665	FBgn0033028	XLOC_005151	2R	FBtr0345359;FBtr0086072	11.2753	-0.319351	0.577639	-0.552855	0.580363	1
CG11670	FBgn0038114	XLOC_010809	3R	FBtr0300071	6.77249	-0.57365	0.604459	-0.949031	0.342605	1
CG11671	FBgn0037562	XLOC_010450	3R	FBtr0081829	143.02	-1.31479	0.333937	-3.93724	8.24252e-05	0.00375928
CG11672	FBgn0037563	XLOC_012432	3R	FBtr0332542;FBtr0081865	262.373	0.233575	0.354167	0.659504	0.509572	0.884837
CG11674	FBgn0030551	XLOC_016326	X	FBtr0073926	24.9529	-0.483063	0.486245	-0.993456	0.320488	0.76544
CG11679	FBgn0030678	XLOC_016417	X	FBtr0074202	1.03506	-0.0598375	0.391768	-0.152737	0.878605	1
CG11686	FBgn0040551	XLOC_010821	3R	FBtr0335222;FBtr0082735	1.2514	0.414866	0.399985	1.0372	0.299641	1
CG11693	FBgn0037570	XLOC_012438	3R	FBtr0306794;FBtr0081860	41.474	-0.168973	0.409585	-0.412547	0.679938	0.939105
CG11694	FBgn0037571	XLOC_012439	3R	FBtr0081859	1.2514	0.414866	0.399985	1.0372	0.299641	1
CG11695	FBgn0030316	XLOC_014943	X	FBtr0300872;FBtr0073513	3.31764	0.0268633	0.573231	0.046863	0.962622	1
CG11696	FBgn0030314	XLOC_014942	X	FBtr0073512	12.8709	-0.116182	0.593383	-0.195796	0.84477	1
CG11697	FBgn0030313	XLOC_014941	X	FBtr0332616;FBtr0073511	1.75683	-0.3189	0.490326	-0.650384	0.515444	1
CG11699	FBgn0030311	XLOC_014940	X	FBtr0073510	6.17235	0.552778	0.603681	0.91568	0.359835	1
CG11700	FBgn0029856	XLOC_015877	X	FBtr0333520	1.86988	-0.0489766	0.4906	-0.0998299	0.920479	1
CG11703	FBgn0038690	XLOC_013209	3R	FBtr0083744	2.64618	-0.263399	0.518439	-0.508062	0.61141	1
CG11710	FBgn0031115	XLOC_016764	X	FBtr0339682;FBtr0089643;FBtr0089642	8.30678	-0.382986	0.596619	-0.641928	0.52092	1
CG11714;Fuca		XLOC_009304	3L	FBtr0346859;FBtr0100588;FBtr0346860;FBtr0339510;FBtr0076156	5.13778	0.290482	0.589964	0.492373	0.622456	1
CG1172	FBgn0264712	XLOC_010231	3R	FBtr0078792;FBtr0309312;FBtr0333810	2.19912	-0.361203	0.501765	-0.719866	0.471607	1
CG11722	FBgn0037777	XLOC_012575	3R	FBtr0082205	10.394	-0.476354	0.605156	-0.787158	0.431189	1
CG11723	FBgn0031391	XLOC_001903	2L	FBtr0334813;FBtr0077852	0.26343	-0.205717	0.311207	-0.661028	0.508594	1
CG11726	FBgn0036156	XLOC_007621	3L	FBtr0076172	0.26343	-0.205717	0.311207	-0.661028	0.508594	1
CG11737	FBgn0037592	XLOC_010466	3R	FBtr0081869;FBtr0310048;FBtr0310047	48.753	1.83874	0.556205	3.30587	0.000946815	0.0263978
CG11739	FBgn0037239	XLOC_010177	3R	FBtr0078914;FBtr0078913;FBtr0078915;FBtr0078916	11.2019	-1.00995	0.575507	-1.75489	0.0792785	1
CG11741	FBgn0040531	XLOC_012449	3R	FBtr0112769	0.722213	0.271785	0.337575	0.805111	0.420756	1
CG11752	FBgn0030292	XLOC_014923	X	FBtr0073452	6.5755	0.295685	0.604216	0.48937	0.62458	1
CG11753	FBgn0037603	XLOC_010476	3R	FBtr0334317;FBtr0310655;FBtr0081879	65.2424	-0.599516	0.405035	-1.48016	0.13883	0.571722
CG11762	FBgn0037618	XLOC_010485	3R	FBtr0081912	37.8744	-2.09624	0.467826	-4.48081	7.43597e-06	0.000496306
CG11771	FBgn0039252	XLOC_011636	3R	FBtr0084748	94.3961	-0.362063	0.337976	-1.07127	0.284049	0.743828
CG11777	FBgn0033527	XLOC_003806	2R	FBtr0088273	725.799	-0.839936	0.291541	-2.88102	0.00396394	0.07113
CG11779	FBgn0038683	XLOC_013205	3R	FBtr0335020;FBtr0083750;FBtr0083749	154.436	0.910373	0.584249	1.55819	0.119187	0.538057
CG11781	FBgn0039259	XLOC_013623	3R	FBtr0084797	3.61158	-0.367357	0.597917	-0.614393	0.538955	1
CG11786	FBgn0039264	XLOC_011644	3R	FBtr0113282	1.7028	0.276392	0.471867	0.585742	0.558049	1
CG11788	FBgn0034495	XLOC_004660	2R	FBtr0086277	55.141	0.483354	0.379389	1.27403	0.202652	0.659239
CG11790	FBgn0039265	XLOC_011645	3R	FBtr0334503;FBtr0084761;FBtr0084760	26.169	0.25524	0.485479	0.52575	0.599062	0.911754
CG11791	FBgn0039266	XLOC_011646	3R	FBtr0334504;FBtr0084762;FBtr0113283;FBtr0084763	41.785	-0.241255	0.428829	-0.562591	0.573713	0.904961
CG11796	FBgn0036992	XLOC_009960	3L	FBtr0078226;FBtr0078225	51.9626	0.381276	0.38793	0.982848	0.325682	0.769715
CG11802	FBgn0030346	XLOC_016202	X	FBtr0073600	5.16531	0.384883	0.595129	0.646722	0.517812	1
CG11807	FBgn0033996	XLOC_004184	2R	FBtr0310140;FBtr0310139;FBtr0087363	4.32732	0.902529	0.598107	1.50897	0.131305	1
CG11808	FBgn0034000	XLOC_004188	2R	FBtr0087366	7.59044	0.523331	0.601975	0.869357	0.384652	1
CG11811	FBgn0036099	XLOC_007568	3L	FBtr0076265	9.7685	-0.594784	0.605293	-0.982639	0.325785	1
CG11815	FBgn0035299	XLOC_008661	3L	FBtr0072852	1.47741	0.0736132	0.432223	0.170313	0.864764	1
CG11825	FBgn0033519	XLOC_005526	2R	FBtr0088316;FBtr0329868;FBtr0329867	9.83112	-0.588302	0.60401	-0.973993	0.33006	1
CG11828	FBgn0039616	XLOC_011918	3R	FBtr0308601	0.400979	-0.226108	0.3219	-0.702416	0.482419	1
CG11835	FBgn0031264	XLOC_001805	2L	FBtr0332342;FBtr0332341;FBtr0078076;FBtr0345577	55.3019	-0.222714	0.38007	-0.585982	0.557887	0.897611
CG11836	FBgn0039272	XLOC_011650	3R	FBtr0113284;FBtr0302405;FBtr0302406;FBtr0302404;FBtr0084768;FBtr0084767	1.82352	-0.0919583	0.515096	-0.178526	0.85831	1
CG11837	FBgn0039627	XLOC_011926	3R	FBtr0085360	0.813672	0.00936567	0.36477	0.0256756	0.979516	1
CG11839	FBgn0039271	XLOC_011649	3R	FBtr0304718	3.32349	-0.49958	0.58298	-0.856941	0.391478	1
CG11841	FBgn0039628	XLOC_011927	3R	FBtr0085361	1.13889	-0.127558	0.401043	-0.318067	0.750434	1
CG11842	FBgn0039629	XLOC_011928	3R	FBtr0085362	0.761496	-0.246955	0.332224	-0.743339	0.457276	1
CG11843	FBgn0039630	XLOC_011929	3R	FBtr0346138;FBtr0085363	1.44887	-0.455733	0.422421	-1.07886		1
CG11851	FBgn0039293	XLOC_011666	3R	FBtr0084808	7.0711	0.234421	0.602463	0.389104	0.697199	1
CG11852	FBgn0039297	XLOC_011667	3R	FBtr0084809	2.2389	-0.115747	0.500693	-0.231173	0.81718	1
CG11854	FBgn0039299	XLOC_011669	3R	FBtr0339259	2.02358	0.144827	0.487425	0.297126	0.76637	1
CG11857	FBgn0039303	XLOC_011672	3R	FBtr0084814	49.7742	-0.054301	0.411024	-0.132112	0.894896	0.986351
CG11858	FBgn0039305	XLOC_011674	3R	FBtr0084815	20.0604	-0.0147679	0.5228	-0.0282478	0.977465	0.993992
CG11865	FBgn0028947	XLOC_001248	2L	FBtr0080753	0.843324	0.00664832	0.36676	0.0181272	0.985537	1
CG11873	FBgn0039633	XLOC_011931	3R	FBtr0085365;FBtr0330299;FBtr0330301;FBtr0330300	42.2444	0.278373	0.431396	0.645284	0.518743	0.885038
CG11876	FBgn0039635	XLOC_011933	3R	FBtr0085367;FBtr0085366;FBtr0085368;FBtr0085369	48.7351	-0.761679	0.428534	-1.77741	0.0755016	0.439219
CG11878	FBgn0039310	XLOC_011679	3R	FBtr0084821	69.7586	0.372935	0.372995	0.999839	0.317388	0.763662
CG11880	FBgn0039637	XLOC_011935	3R	FBtr0085371;FBtr0085373;FBtr0085372	27.3113	-0.157935	0.492364	-0.320769	0.748385	0.955513
CG11882	FBgn0039642	XLOC_013890	3R	FBtr0335407;FBtr0085411	0.592718	-0.244268	0.330703	-0.738634	0.460129	1
CG11883	FBgn0033538	XLOC_003811	2R	FBtr0088284;FBtr0088283;FBtr0339461;FBtr0113063	8.3934	0.232983	0.599917	0.388359	0.69775	1
CG11885	FBgn0031253	XLOC_001797	2L	FBtr0078089	25.1467	0.933797	0.525219	1.77792	0.0754172	0.439219
CG11889;CG11891		XLOC_011678	3R	FBtr0344492;FBtr0100614;FBtr0300131;FBtr0300132	32.0608	0.280061	0.519066	0.539548	0.589509	0.908069
CG11892	FBgn0039313	XLOC_011680	3R	FBtr0089645;FBtr0089644	85.986	-0.0623601	0.36559	-0.170574	0.864559	0.979523
CG11893	FBgn0039316	XLOC_011684	3R	FBtr0084827	71.9741	-0.105131	0.425185	-0.247259	0.804708	0.966038
CG11897	FBgn0039644	XLOC_011940	3R	FBtr0085387;FBtr0085386	84.7747	0.231691	0.335707	0.690158	0.490095	0.876807
CG11898	FBgn0039645	XLOC_011941	3R	FBtr0273260	12.4846	-0.00935437	0.576134	-0.0162365	0.987046	1
CG11899	FBgn0014427	XLOC_011943	3R	FBtr0085390	32.9568	-0.703905	0.509633	-1.3812	0.167217	0.622953
CG11902	FBgn0028647	XLOC_011688	3R	FBtr0300735	5.28202	0.235949	0.603137	0.391202	0.695648	1
CG11905	FBgn0036678	XLOC_009694	3L	FBtr0113174;FBtr0305577;FBtr0075305;FBtr0075300;FBtr0113173;FBtr0075304;FBtr0075301;FBtr0075306;FBtr0075303;FBtr0075302	0.400979	-0.226108	0.3219	-0.702416	0.482419	1
CG11906	FBgn0034425	XLOC_006214	2R	FBtr0086563	1.95302	0.372157	0.491892	0.756583	0.4493	1
CG11911	FBgn0031249	XLOC_001790	2L	FBtr0078098	102.288	-0.107206	0.369703	-0.289977	0.771833	0.95983
CG11912	FBgn0031248	XLOC_001789	2L	FBtr0078099	46.1169	0.203061	0.403336	0.503454	0.614645	0.919003
CG11913	FBgn0039331	XLOC_011690	3R	FBtr0273265	67.1183	0.791839	0.369993	2.14014	0.0323431	0.284131
CG11920	FBgn0039274	XLOC_011651	3R	FBtr0084769	1.2514	0.414866	0.399985	1.0372	0.299641	1
CG11927	FBgn0031638	XLOC_000418	2L	FBtr0077386	71.1928	0.041351	0.360236	0.114789	0.908613	0.986674
CG11951	FBgn0039656	XLOC_013898	3R	FBtr0306020;FBtr0085403	32.6424	0.879022	0.481948	1.82389	0.0681682	0.42014
CG11961	FBgn0034436	XLOC_004577	2R	FBtr0086519;FBtr0086520;FBtr0308495	34.5813	-0.608283	0.481402	-1.26357	0.206386	0.663854
CG11964	FBgn0037644	XLOC_012483	3R	FBtr0082015	19.4471	-0.134285	0.549454	-0.244397	0.806924	0.967001
CG11966	FBgn0037645	XLOC_012484	3R	FBtr0334329;FBtr0082014	0.818111	-0.0223871	0.361464	-0.0619345	0.950615	1
CG11970	FBgn0027503	XLOC_010502	3R	FBtr0346139;FBtr0081959	11.2944	-0.961482	0.597829	-1.60829	0.107772	1
CG11975	FBgn0037648	XLOC_010503	3R	FBtr0081960;FBtr0336753	2.37892	0.375603	0.561502	0.668926	0.503543	1
CG11977	FBgn0037650	XLOC_010504	3R	FBtr0300742	6.15944	-0.196535	0.390395	-0.503425	0.614666	1
CG11980	FBgn0037652	XLOC_010505	3R	FBtr0081963;FBtr0081962;FBtr0081964	68.725	-1.04296	0.395463	-2.63732	0.00835641	0.122613
CG11982	FBgn0037653	XLOC_010506	3R	FBtr0081965	4.32097	0.171629	0.588009	0.291882	0.770377	1
CG11983	FBgn0037654	XLOC_010507	3R	FBtr0081966;FBtr0336754	6.60218	0.0750373	0.6052	0.123988	0.901325	1
CG11984	FBgn0037655	XLOC_012489	3R	FBtr0300745;FBtr0300748;FBtr0300747;FBtr0300744;FBtr0300746;FBtr0300743	45.7584	0.338229	0.417688	0.809764	0.418076	0.836946
CG11985	FBgn0040534	XLOC_012490	3R	FBtr0082006	4.66644	-0.610961	0.602224	-1.01451	0.310341	1
CG11986	FBgn0037656	XLOC_010508	3R	FBtr0081967	13.8286	0.327829	0.547776	0.598474	0.549524	1
CG11997	FBgn0037662	XLOC_010514	3R	FBtr0081972	21.5289	0.228595	0.519804	0.439771	0.660103	0.933856
CG11999	FBgn0037312	XLOC_012208	3R	FBtr0078807	9.94898	-0.264787	0.593526	-0.446125	0.655507	1
CG12003	FBgn0035234	XLOC_006959	3L	FBtr0072744	120.204	0.460793	0.305895	1.50638	0.131971	0.556537
CG12004	FBgn0035236	XLOC_006960	3L	FBtr0072745;FBtr0113122;FBtr0345367;FBtr0072746	24.1458	-0.163287	0.480445	-0.339867	0.733957	0.951897
CG12006	FBgn0035464	XLOC_007113	3L	FBtr0073150;FBtr0073149	33.9587	-0.82196	0.532446	-1.54374	0.122651	0.54003
CG12007	FBgn0037293	XLOC_010213	3R	FBtr0078842	20.398	-0.731567	0.577006	-1.26787	0.204845	0.662208
CG12009	FBgn0035430	XLOC_007082	3L	FBtr0308314;FBtr0073053	27.7858	0.0649589	0.474179	0.136992	0.891037	0.98538
CG12010	FBgn0035443	XLOC_007095	3L	FBtr0073075	4.99653	0.455293	0.605067	0.752467	0.45177	1
CG12012	FBgn0035444	XLOC_007096	3L	FBtr0300749;FBtr0073076;FBtr0346532	3.53678	0.169148	0.576258	0.293529	0.769118	1
CG12014	FBgn0035445	XLOC_007097	3L	FBtr0073077	1.84068	0.477187	0.494005	0.965956	0.334066	1
CG12016	FBgn0035436	XLOC_007089	3L	FBtr0300240;FBtr0073064	69.6985	0.219599	0.373842	0.58741	0.556929	0.897611
CG12018	FBgn0027903	XLOC_006978	3L	FBtr0072775	32.9211	-0.124741	0.458728	-0.271928	0.785678	0.961582
CG12024	FBgn0035283	XLOC_006986	3L	FBtr0303152;FBtr0072833;FBtr0072832	32.4946	0.40241	0.448504	0.897227	0.369598	0.804298
CG12025	FBgn0035285	XLOC_006987	3L	FBtr0072834;FBtr0332668;FBtr0345381	20.3766	0.251312	0.534012	0.470612	0.637918	0.927764
CG12034	FBgn0035421	XLOC_007072	3L	FBtr0073043	15.21	0.206455	0.550999	0.374692	0.70789	1
CG12035	FBgn0035263	XLOC_006973	3L	FBtr0072766	337.45	-0.923154	0.235363	-3.92225	8.77243e-05	0.00385603
CG12038	FBgn0035179	XLOC_006909	3L	FBtr0072619	3.56846	0.0754606	0.549188	0.137404	0.890712	1
CG12042	FBgn0033206	XLOC_005292	2R	FBtr0088944	430.579	-0.351084	0.28484	-1.23257	0.217738	0.674409
CG12050	FBgn0032915	XLOC_003275	2L	FBtr0114615	4.04836	0.220834	0.585674	0.37706	0.706129	1
CG12054	FBgn0039831	XLOC_012077	3R	FBtr0085758;FBtr0335409;FBtr0335408;FBtr0113312	43.0003	-0.242527	0.441937	-0.548783	0.583155	0.906836
CG12056	FBgn0030099	XLOC_014814	X	FBtr0071305	1.57836	-0.0337538	0.443154	-0.0761671	0.939286	1
CG12057	FBgn0030098	XLOC_014813	X	FBtr0332623;FBtr0071304	305.416	0.196546	0.303567	0.647453	0.517339	0.885038
CG12061	FBgn0040031	XLOC_015532	X	FBtr0333740;FBtr0332625	5.97998	0.0100268	0.604658	0.0165825	0.98677	1
CG12065	FBgn0030052	XLOC_014780	X	FBtr0071216;FBtr0300750;FBtr0300751;FBtr0071217;FBtr0071215;FBtr0071214	42.2029	-0.748159	0.459687	-1.62754	0.103622	0.502324
CG12069	FBgn0039796	XLOC_014027	3R	FBtr0085728;FBtr0335455	0.400979	-0.226108	0.3219	-0.702416	0.482419	1
CG12071	FBgn0039808	XLOC_014039	3R	FBtr0344716;FBtr0346758	1.84985	-0.697281	0.489709	-1.42387	0.154484	1
CG12075	FBgn0030065	XLOC_014792	X	FBtr0307271;FBtr0335035;FBtr0071253;FBtr0335034;FBtr0071254	23.2882	0.0416501	0.509215	0.0817927	0.934812	0.991392
CG12078	FBgn0035426	XLOC_008741	3L	FBtr0308063;FBtr0073092	1.4522	0.05721	0.453406	0.126178	0.899591	1
CG12081	FBgn0030053	XLOC_014781	X	FBtr0071218;FBtr0332626	8.64641	-0.300681	0.602625	-0.498953	0.617813	1
CG12082	FBgn0035402	XLOC_008721	3L	FBtr0307308;FBtr0073114	27.1484	-1.62988	0.485793	-3.3551	0.000793367	0.023089
CG12084	FBgn0043458	XLOC_008604	3L	FBtr0332656;FBtr0072711	12.9707	0.317836	0.561545	0.566003	0.571392	1
CG12090	FBgn0035227	XLOC_008608	3L	FBtr0072705;FBtr0333402;FBtr0333401;FBtr0072704;FBtr0072703	39.8768	0.265916	0.453576	0.586266	0.557697	0.897611
CG12091	FBgn0035228	XLOC_008610	3L	FBtr0333400;FBtr0072831	23.532	-1.11327	0.490662	-2.26892	0.0232735	0.23501
CG12093	FBgn0035372	XLOC_008702	3L	FBtr0073015	2.57066	0.238917	0.54046	0.442062	0.658444	1
CG12096	FBgn0030457	XLOC_015034	X	FBtr0073727;FBtr0340298;FBtr0340299	34.5291	-0.0923129	0.446075	-0.206945	0.836053	0.975723
CG12099	FBgn0035232	XLOC_008613	3L	FBtr0072829;FBtr0072828	62.7472	0.43379	0.409306	1.05982	0.289228	0.749018
CG12104	FBgn0035238	XLOC_008615	3L	FBtr0333360;FBtr0344803;FBtr0072825	70.4592	0.780651	0.355244	2.19751	0.0279842	0.264979
CG12105	FBgn0035241	XLOC_008616	3L	FBtr0072824	5.37499	0.135932	0.605458	0.224511	0.82236	1
CG12106	FBgn0030100	XLOC_014815	X	FBtr0071306	343.264	-0.0339588	0.243718	-0.139336	0.889184	0.984326
CG12107	FBgn0033209	XLOC_003561	2R	FBtr0088924	7.43419	-0.445979	0.599655	-0.743726	0.457042	1
CG12111	FBgn0030050	XLOC_016018	X	FBtr0331726;FBtr0071232	4.56949	0.722618	0.588458	1.22799	0.219452	1
CG12112	FBgn0030048	XLOC_016017	X	FBtr0331727;FBtr0071233	52.9412	0.075982	0.466212	0.162977	0.870536	0.98025
CG12116	FBgn0030041	XLOC_016013	X	FBtr0071240	21.0977	-1.27402	0.541971	-2.35071	0.0187378	0.205758
CG12118	FBgn0030101	XLOC_016051	X	FBtr0071340;FBtr0071339	45.3801	-0.00549496	0.409781	-0.0134095	0.989301	0.996768
CG12119	FBgn0030102	XLOC_016053	X	FBtr0071336;FBtr0340494	165.474	0.422824	0.555492	0.76117	0.446556	0.854962
CG12121	FBgn0030109	XLOC_016055	X	FBtr0071334	13.4919	-0.145928	0.555619	-0.26264	0.792828	1
CG12123	FBgn0030039	XLOC_016007	X	FBtr0071245	17.9816	-0.233699	0.541436	-0.431628	0.666012	1
CG12125	FBgn0030037	XLOC_016006	X	FBtr0071246;FBtr0345986;FBtr0300383	348.208	-0.0306676	0.264009	-0.116161	0.907525	0.986674
CG12128	FBgn0033473	XLOC_003774	2R	FBtr0088393;FBtr0088394	504.496	-0.127978	0.226743	-0.564416	0.572471	0.904846
CG12129	FBgn0033475	XLOC_003775	2R	FBtr0088395	30.1125	0.311329	0.477391	0.652147	0.514306	0.885038
CG1213	FBgn0037387	XLOC_010272	3R	FBtr0078642;FBtr0078644;FBtr0305954;FBtr0078643	47.811	0.107407	0.404487	0.265539	0.790594	0.961582
CG12133	FBgn0033469	XLOC_003769	2R	FBtr0339424	0.676123	0.0592407	0.342909	0.172759	0.862841	1
CG12134	FBgn0033471	XLOC_003771	2R	FBtr0088389;FBtr0088388	0.26343	-0.205717	0.311207	-0.661028	0.508594	1
CG12147	FBgn0037325	XLOC_012217	3R	FBtr0078793	0.442345	0.244242	0.321051	0.760758	0.446802	1
CG12155	FBgn0029957	XLOC_014724	X	FBtr0071071	4.35676	0.447517	0.579729	0.771942	0.440149	1
CG12158	FBgn0040775	XLOC_005440	2R	FBtr0088557	0.400979	-0.226108	0.3219	-0.702416	0.482419	1
CG12159	FBgn0033232	XLOC_005310	2R	FBtr0088889;FBtr0088888	5.58542	-0.51498	0.605213	-0.850907	0.394821	1
CG12162	FBgn0037329	XLOC_010233	3R	FBtr0078680;FBtr0078681	66.0349	-0.388304	0.379157	-1.02413	0.305775	0.756259
CG12163	FBgn0260462	XLOC_012201	3R	FBtr0078823;FBtr0078822;FBtr0303994	75.4752	-0.267277	0.384434	-0.695247	0.4869	0.8747
CG12164	FBgn0033158	XLOC_003533	2R	FBtr0088963;FBtr0345800	0.442345	0.244242	0.321051	0.760758	0.446802	1
CG12170	FBgn0037356	XLOC_010252	3R	FBtr0078709	10.6978	0.890999	0.590582	1.50868	0.131381	1
CG12171	FBgn0037354	XLOC_010251	3R	FBtr0078708	20.4899	-0.447322	0.522921	-0.855428	0.392314	0.822576
CG12173	FBgn0037305	XLOC_012203	3R	FBtr0078821	1.31493	0.0446721	0.422785	0.105662	0.915851	1
CG12177	FBgn0030510	XLOC_016290	X	FBtr0073846;FBtr0340399;FBtr0346119	21.2906	-0.171023	0.556251	-0.307456	0.758496	0.95812
CG12179	FBgn0025388	XLOC_015786	X	FBtr0300755;FBtr0300754	9.14566	0.150784	0.60511	0.249184	0.803219	1
CG1218	FBgn0037377	XLOC_010266	3R	FBtr0078630	52.6652	-0.522732	0.378361	-1.38157	0.167104	0.622953
CG12182	FBgn0028504	XLOC_008694	3L	FBtr0344989;FBtr0332040;FBtr0072955	378.688	-1.17799	0.226975	-5.18993	2.10372e-07	2.50297e-05
CG12184	FBgn0025387	XLOC_015785	X	FBtr0343532;FBtr0335037;FBtr0070696	7.82656	0.0722362	0.599102	0.120574	0.904028	1
CG12194	FBgn0031636	XLOC_000417	2L	FBtr0300756;FBtr0077385;FBtr0332476	31.2623	0.303498	0.474809	0.639201	0.522692	0.885074
CG12200	FBgn0031018	XLOC_015396	X	FBtr0074710	6.12428	-0.391774	0.604339	-0.648269	0.516811	1
CG12203	FBgn0031021	XLOC_015398	X	FBtr0074712	48.0308	0.299192	0.4095	0.730627	0.465007	0.863585
CG12204	FBgn0031022	XLOC_016672	X	FBtr0074783	189.317	-0.231612	0.28836	-0.803202	0.421858	0.838937
CG12206	FBgn0029662	XLOC_015736	X	FBtr0070529;FBtr0070528;FBtr0070527	74.4679	0.296972	0.349613	0.849432	0.395641	0.823637
CG12207	FBgn0038220	XLOC_010883	3R	FBtr0344157;FBtr0082921;FBtr0309999;FBtr0082922;FBtr0082923;FBtr0309997;FBtr0309998	40.8993	0.0975146	0.447642	0.217841	0.827553	0.973053
CG12209	FBgn0033498	XLOC_005509	2R	FBtr0088364	0.26343	-0.205717	0.311207	-0.661028	0.508594	1
CG12213	FBgn0260742	XLOC_012703	3R	FBtr0334156;FBtr0113223;FBtr0334155;FBtr0082510	7.50741	0.319112	0.599717	0.532104	0.594654	1
CG12219	FBgn0043796	XLOC_015882	X	FBtr0070925	5.73681	-0.213113	0.602738	-0.353575	0.723658	1
CG12224	FBgn0037974	XLOC_012708	3R	FBtr0306697;FBtr0335436	9.96777	-0.867159	0.600317	-1.4445	0.148598	1
CG12229	FBgn0036723	XLOC_009727	3L	FBtr0075226	43.7271	0.364694	0.473475	0.770249	0.441152	0.851595
CG12231	FBgn0031026	XLOC_016676	X	FBtr0074779	0.818111	-0.0223871	0.361464	-0.0619345	0.950615	1
CG12236	FBgn0029822	XLOC_014618	X	FBtr0070826;FBtr0070825	73.3202	-0.236796	0.373639	-0.633757	0.526239	0.885144
CG12237	FBgn0031048	XLOC_016687	X	FBtr0074761	9.11021	-0.369007	0.60451	-0.610424	0.541581	1
CG12239	FBgn0029810	XLOC_014606	X	FBtr0070814	0.400979	-0.226108	0.3219	-0.702416	0.482419	1
CG12241	FBgn0038304	XLOC_010929	3R	FBtr0083051	8.99485	-0.708975	0.602245	-1.17722	0.239107	1
CG12259	FBgn0039557	XLOC_013829	3R	FBtr0085270	5.18276	0.000923937	0.601098	0.00153708	0.998774	1
CG12262	FBgn0035811	XLOC_007356	3L	FBtr0076808	88.1782	-0.536385	0.352845	-1.52017	0.128468	0.550591
CG12263	FBgn0034346	XLOC_004512	2R	FBtr0086691	52.5346	1.02172	0.385419	2.65093	0.00802703	0.11938
CG12264	FBgn0032393	XLOC_001009	2L	FBtr0080290	135.27	-0.512799	0.305088	-1.68082	0.092797	0.472075
CG12267	FBgn0038057	XLOC_010774	3R	FBtr0303028;FBtr0082635	12.3535	0.158052	0.568566	0.277984	0.781025	1
CG12268	FBgn0039131	XLOC_013535	3R	FBtr0308071;FBtr0084514;FBtr0084513	66.6368	-0.872854	0.594596	-1.46798	0.14211	0.578698
CG12269	FBgn0038665	XLOC_013195	3R	FBtr0304691;FBtr0083722	0.855038	0.386849	0.389016	0.99443	0.320014	1
CG1227	FBgn0037491	XLOC_012351	3R	FBtr0339736;FBtr0081598	1.53987	-0.237661	0.436192	-0.544855	0.585853	1
CG12272	FBgn0036571	XLOC_007947	3L	FBtr0333292;FBtr0301912;FBtr0075452	487.815	0.453161	0.228426	1.98384	0.0472733	0.348031
CG12278	FBgn0038847	XLOC_011337	3R	FBtr0084003	2.61231	0.422582	0.528749	0.79921	0.424169	1
CG12279	FBgn0038080	XLOC_010791	3R	FBtr0082656	26.7547	0.235459	0.5058	0.465518	0.641561	0.929014
CG12288	FBgn0032620	XLOC_003002	2L	FBtr0080957	76.8951	-0.353834	0.386889	-0.914561	0.360422	0.797623
CG12290	FBgn0039419	XLOC_011757	3R	FBtr0339612	15.5982	-0.297729	0.54984	-0.541484	0.588174	1
CG12299	FBgn0032295	XLOC_000923	2L	FBtr0080113	13.0817	0.0938624	0.558276	0.168129	0.866482	1
CG12301	FBgn0036514	XLOC_007897	3L	FBtr0075564	4.77456	0.00229737	0.601189	0.00382138	0.996951	1
CG12304	FBgn0036515	XLOC_007898	3L	FBtr0075566;FBtr0075565	5.98386	0.13326	0.60155	0.221528	0.824681	1
CG12309	FBgn0033542	XLOC_003815	2R	FBtr0088215	14.559	0.570663	0.567949	1.00478	0.315003	1
CG1231	FBgn0035134	XLOC_006867	3L	FBtr0072546	3.82245	-0.147905	0.585974	-0.252409	0.800725	1
CG12316	FBgn0036483	XLOC_009554	3L	FBtr0075652;FBtr0075651	4.29068	0.274776	0.58922	0.466339	0.640973	1
CG12320	FBgn0038590	XLOC_013146	3R	FBtr0347215	43.9262	0.692684	0.432615	1.60116	0.109342	0.515445
CG12321	FBgn0038577	XLOC_013139	3R	FBtr0083616	21.5698	-0.547175	0.531308	-1.02986	0.303074	0.75328
CG12325	FBgn0033557	XLOC_003825	2R	FBtr0345930;FBtr0088227	0.722213	0.271785	0.337575	0.805111	0.420756	1
CG1233	FBgn0035137	XLOC_006869	3L	FBtr0072549;FBtr0072548	14.3477	-0.568679	0.567015	-1.00293	0.315893	1
CG12333	FBgn0038617	XLOC_013164	3R	FBtr0083655	5.24605	-0.427658	0.599218	-0.713693	0.475417	1
CG12338	FBgn0033543	XLOC_005541	2R	FBtr0088256;FBtr0345662	3.30638	0.219831	0.573803	0.383112	0.701636	1
CG1234	FBgn0037489	XLOC_012350	3R	FBtr0081599	3.64151	-0.372314	0.592098	-0.628805	0.529477	1
CG12341	FBgn0033550	XLOC_005548	2R	FBtr0088251	2.40414	0.363857	0.546208	0.666151	0.505314	1
CG12343	FBgn0033556	XLOC_005551	2R	FBtr0088247	15.0741	-0.0434485	0.548515	-0.0792112	0.936865	1
CG12344	FBgn0033558	XLOC_005552	2R	FBtr0339476;FBtr0088246;FBtr0339478;FBtr0339477	11.5486	0.641924	0.596812	1.07559	0.282111	1
CG12355	FBgn0040805	XLOC_009563	3L	FBtr0075606;FBtr0113333;FBtr0334086;FBtr0300758	2.14812	-0.184493	0.531533	-0.347096	0.728519	1
CG1236	FBgn0037370	XLOC_010261	3R	FBtr0078721	5.71322	-0.044086	0.601318	-0.0733155	0.941555	1
CG12360	FBgn0038111	XLOC_012791	3R	FBtr0082718;FBtr0082717;FBtr0113229	51.2718	-0.132016	0.42516	-0.310509	0.756174	0.95812
CG12362	FBgn0036082	XLOC_007554	3L	FBtr0076282;FBtr0076281	3.31601	-0.20322	0.586217	-0.346664	0.728844	1
CG12374	FBgn0033774	XLOC_004006	2R	FBtr0087854	400.445	0.123083	0.280654	0.438557	0.660982	0.933856
CG12375	FBgn0031987	XLOC_002383	2L	FBtr0079642	8.52728	-0.632375	0.596566	-1.06003	0.289133	1
CG12376	FBgn0033323	XLOC_003652	2R	FBtr0088706;FBtr0339335	1.44397	0.0069885	0.432268	0.0161671	0.987101	1
CG12379	FBgn0030676	XLOC_016415	X	FBtr0273278	33.4073	-0.322397	0.454796	-0.708883	0.478397	0.869875
CG12384	FBgn0033624	XLOC_005599	2R	FBtr0088155	47.515	-0.421734	0.407771	-1.03424	0.301022	0.751252
CG1239	FBgn0037368	XLOC_010260	3R	FBtr0343989;FBtr0343988;FBtr0078720	1.16248	-0.438429	0.41883	-1.04679	0.295194	1
CG12391	FBgn0033581	XLOC_005566	2R	FBtr0088205	10.7737	-0.0368419	0.597915	-0.0616174	0.950868	1
CG12393	FBgn0031768	XLOC_000526	2L	FBtr0079183;FBtr0079184;FBtr0343120	115.662	0.0974103	0.346087	0.281462	0.778356	0.96043
CG12395	FBgn0030722	XLOC_016445	X	FBtr0074260	0.818111	-0.0223871	0.361464	-0.0619345	0.950615	1
CG12398	FBgn0030596	XLOC_016358	X	FBtr0073976	48.9379	0.972042	0.464207	2.09398	0.0362614	0.300577
CG12400	FBgn0031505	XLOC_002000	2L	FBtr0329905;FBtr0077617	5.78845	-0.785078	0.604449	-1.29883	0.194001	1
CG12404	FBgn0032465	XLOC_002742	2L	FBtr0080430	4.85544	-0.330606	0.599028	-0.551904	0.581014	1
CG12413	FBgn0039588	XLOC_013858	3R	FBtr0085293	3.04165	-0.668796	0.55163	-1.2124	0.225359	1
CG12428	FBgn0039543	XLOC_013824	3R	FBtr0085240;FBtr0085239;FBtr0085238;FBtr0085236	46.8835	0.33443	0.424458	0.787899	0.430756	0.842575
CG12438	FBgn0032065	XLOC_000738	2L	FBtr0079732	0.26343	-0.205717	0.311207	-0.661028	0.508594	1
CG12446	FBgn0031201	XLOC_016848	X	FBtr0077343	6.23307	0.667943	0.597153	1.11855	0.263334	1
CG12448	FBgn0028857	XLOC_001270	2L	FBtr0300613	0.843324	0.00664832	0.36676	0.0181272	0.985537	1
CG1246	FBgn0035360	XLOC_007030	3L	FBtr0333446;FBtr0303022;FBtr0072938;FBtr0345027	42.5115	-0.512373	0.409248	-1.25199	0.210575	0.66908
CG12464	FBgn0033861	XLOC_005793	2R	FBtr0087652	3.10941	-1.18798	0.564279	-2.10531	0.035264	1
CG12470	FBgn0040371	XLOC_014317	X	FBtr0070069	2.58776	-0.615353	0.533053	-1.15439	0.248339	1
CG12483	FBgn0040688	XLOC_008503	3L	FBtr0072540	3.06495	0.0665273	0.567528	0.117223	0.906683	1
CG12484	FBgn0086604	XLOC_004674	2R	FBtr0112774;FBtr0342690;FBtr0273284;FBtr0112775	74.7924	0.122558	0.605072	0.202551	0.839486	0.975778
CG12493	FBgn0035571	XLOC_008848	3L	FBtr0332742;FBtr0073363	19.8049	0.39959	0.515604	0.774994	0.438343	0.848921
CG12496	FBgn0040385	XLOC_015688	X	FBtr0070462	27.9308	0.108888	0.481425	0.226178	0.821063	0.973053
CG12499	FBgn0038968	XLOC_013408	3R	FBtr0084295	15.7794	-0.664868	0.548955	-1.21115	0.225837	1
CG12502	FBgn0035171	XLOC_006898	3L	FBtr0300345;FBtr0339892;FBtr0304699	10.46	-0.225878	0.596912	-0.378411	0.705125	1
CG12506	FBgn0031276	XLOC_000113	2L	FBtr0078003	3.88005	0.708529	0.563283	1.25786	0.208444	1
CG12512	FBgn0031703	XLOC_002161	2L	FBtr0079077	7.15229	-0.35596	0.602464	-0.590841	0.554627	1
CG12520	FBgn0036324	XLOC_009421	3L	FBtr0343628;FBtr0113169	0.26343	-0.205717	0.311207	-0.661028	0.508594	1
CG12522	FBgn0036131	XLOC_007597	3L	FBtr0076209	0.442345	0.244242	0.321051	0.760758	0.446802	1
CG12523	FBgn0036102	XLOC_007573	3L	FBtr0339801	1.82897	0.192562	0.519755	0.370486	0.71102	1
CG12531	FBgn0031064	XLOC_015428	X	FBtr0335043;FBtr0074788	6.03384	0.391764	0.593712	0.659856	0.509346	1
CG12535	FBgn0029657	XLOC_015731	X	FBtr0344078;FBtr0332303;FBtr0332304;FBtr0332302;FBtr0070534	1270.34	0.67624	0.258449	2.61653	0.00888294	0.127268
CG12539	FBgn0030586	XLOC_016348	X	FBtr0073987	125.147	1.00142	0.314905	3.18006	0.00147247	0.035817
CG12541	FBgn0029930	XLOC_015928	X	FBtr0343324;FBtr0300760	0.705776	0.0577805	0.346215	0.166892	0.867455	1
CG12547	FBgn0250830	XLOC_005137	2R	FBtr0329829;FBtr0111273;FBtr0345222	26.3215	0.514968	0.47572	1.0825	0.279029	0.736969
CG12560	FBgn0031974	XLOC_002374	2L	FBtr0343383;FBtr0300761	10.2918	-0.578877	0.583993	-0.99124	0.321569	1
CG12567	FBgn0039958	XLOC_003386	2L	FBtr0300702;FBtr0344847;FBtr0300703;FBtr0113705;FBtr0113704;FBtr0300704	10.3326	0.194846	0.593177	0.328479	0.742549	1
CG12576	FBgn0031190	XLOC_016840	X	FBtr0077366;FBtr0335046;FBtr0077365;FBtr0346429	79.025	0.114886	0.345428	0.332592	0.739443	0.952745
CG12581	FBgn0037213	XLOC_010157	3R	FBtr0078962;FBtr0078961	8.5588	-0.103814	0.591965	-0.175373	0.860787	1
CG12582	FBgn0037215	XLOC_010159	3R	FBtr0336703;FBtr0336704;FBtr0306022;FBtr0078964;FBtr0336702	22.1496	-0.325879	0.527003	-0.618362	0.536337	0.891188
CG12589	FBgn0040684	XLOC_012194	3R	FBtr0339316;FBtr0078843;FBtr0339317	3.71039	-1.21526	0.566106	-2.14671	0.0318168	1
CG12590	FBgn0037294	XLOC_010215	3R	FBtr0078773	0.855038	0.386849	0.389016	0.99443	0.320014	1
CG12592	FBgn0037811	XLOC_010607	3R	FBtr0082233	2.20925	-0.123789	0.527761	-0.234555	0.814554	1
CG12594	FBgn0037941	XLOC_010701	3R	FBtr0335210;FBtr0082429	0.400979	-0.226108	0.3219	-0.702416	0.482419	1
CG12605	FBgn0035481	XLOC_008782	3L	FBtr0333137;FBtr0073168;FBtr0073167;FBtr0333138;FBtr0073166	1.17863	-0.0995171	0.397476	-0.250373	0.802299	1
CG12608	FBgn0030630	XLOC_016387	X	FBtr0074018	7.92369	-0.317326	0.604797	-0.524682	0.599804	1
CG12637	FBgn0030224	XLOC_016130	X	FBtr0071504	0.412693	0.246714	0.322651	0.764646	0.444482	1
CG12643	FBgn0040942	XLOC_016107	X	FBtr0071481	3.53825	-0.491687	0.561734	-0.875301	0.38141	1
CG12645	FBgn0030181	XLOC_014861	X	FBtr0332895;FBtr0112973	6.89129	1.16802	0.603051	1.93685	0.0527641	1
CG1265	FBgn0035517	XLOC_007154	3L	FBtr0073228	44.3303	-0.4529	0.41186	-1.09965	0.271486	0.730762
CG12655	FBgn0031080	XLOC_016728	X	FBtr0070036	1.94012	-0.283056	0.452106	-0.626083	0.531261	1
CG12659	FBgn0040929	XLOC_016020	X	FBtr0332627	7.01488	0.162229	0.605443	0.26795	0.788738	1
CG12661	FBgn0030071	XLOC_016033	X	FBtr0333603	38.369	0.992935	0.455411	2.18031	0.0292347	0.272111
CG12662	FBgn0030074	XLOC_016035	X	FBtr0071264	26.3432	0.381554	0.508871	0.749805	0.453372	0.855151
CG12672	FBgn0030886	XLOC_016579	X	FBtr0074539	0.592718	-0.244268	0.330703	-0.738634	0.460129	1
CG12674	FBgn0031388	XLOC_000207	2L	FBtr0334779;FBtr0077827	10.5029	-1.0758	0.595603	-1.80623	0.0708818	1
CG12680	FBgn0029740	XLOC_014569	X	FBtr0300018;FBtr0343530	0.88469	0.318139	0.360214	0.883193	0.377132	1
CG12681	FBgn0029730	XLOC_014563	X	FBtr0070717	1.73161	-0.370062	0.489322	-0.756275	0.449484	1
CG12682	FBgn0029729	XLOC_014561	X	FBtr0070716	0.400979	-0.226108	0.3219	-0.702416	0.482419	1
CG12684	FBgn0029717	XLOC_015784	X	FBtr0070697	0.400979	-0.226108	0.3219	-0.702416	0.482419	1
CG12688	FBgn0029707	XLOC_014544	X	FBtr0308918	0.26343	-0.205717	0.311207	-0.661028	0.508594	1
CG12692	FBgn0029703	XLOC_015768	X	FBtr0345705;FBtr0070658	22.5483	-0.104356	0.572013	-0.182437	0.85524	0.978203
CG12693	FBgn0029705	XLOC_015772	X	FBtr0070654	70.921	0.380011	0.359749	1.05632	0.290821	0.750688
CG12698	FBgn0030721	XLOC_015219	X	FBtr0074139	113.499	1.51065	0.352985	4.27963	1.87207e-05	0.00111368
CG12699	FBgn0046294	XLOC_006071	2R	FBtr0300762	0.722213	0.271785	0.337575	0.805111	0.420756	1
CG12702	FBgn0031070	XLOC_016702	X	FBtr0074809;FBtr0335137;FBtr0346378	274.76	-0.336826	0.242014	-1.39177	0.163994	0.618363
CG12708	FBgn0030666	XLOC_015174	X	FBtr0289961;FBtr0074052	1.10675	-0.100387	0.432365	-0.23218	0.816398	1
CG1271	FBgn0035392	XLOC_007049	3L	FBtr0072989;FBtr0072986;FBtr0072988;FBtr0072987	10.2842	-0.458494	0.588114	-0.7796	0.435626	1
CG12713	FBgn0036536	XLOC_007919	3L	FBtr0075506	7.00521	0.333839	0.605451	0.55139	0.581367	1
CG12717	FBgn0030420	XLOC_016243	X	FBtr0346120;FBtr0073704	15.0617	-1.18607	0.546008	-2.17227	0.0298355	1
CG12723	FBgn0030459	XLOC_016265	X	FBtr0073738	1.97316	0.097361	0.45858	0.21231	0.831865	1
CG12725	FBgn0030483	XLOC_016279	X	FBtr0073788	32.0177	1.42701	0.452355	3.15462	0.00160709	0.0379213
CG12728	FBgn0029825	XLOC_014621	X	FBtr0070859;FBtr0343052	8.03856	-0.214672	0.598761	-0.358527	0.719949	1
CG1273	FBgn0035522	XLOC_007157	3L	FBtr0073231	0.843324	0.00664832	0.36676	0.0181272	0.985537	1
CG12730	FBgn0029771	XLOC_014590	X	FBtr0345785;FBtr0070780	11.1966	0.28797	0.592515	0.486014	0.626958	1
CG12736	FBgn0033184	XLOC_005273	2R	FBtr0088981	174.895	-0.197817	0.294257	-0.67226	0.501418	0.881383
CG12744	FBgn0033459	XLOC_003761	2R	FBtr0088378;FBtr0088377	3.56448	0.13857	0.55987	0.247504	0.804518	1
CG12746	FBgn0037341	XLOC_010239	3R	FBtr0078692;FBtr0078689;FBtr0290215	39.486	-0.173166	0.429041	-0.403613	0.686497	0.939361
CG1275	FBgn0035321	XLOC_008677	3L	FBtr0072907;FBtr0072908;FBtr0072905;FBtr0072906	12.9901	0.534348	0.586956	0.910371	0.362627	1
CG12766	FBgn0035476	XLOC_008778	3L	FBtr0073172	20.0799	0.433891	0.511562	0.84817	0.396343	0.823995
CG12768	FBgn0037206	XLOC_008457	3L	FBtr0331396;FBtr0331398;FBtr0078560;FBtr0331397	2.43132	-0.545313	0.549069	-0.993158	0.320633	1
CG12769	FBgn0033252	XLOC_005329	2R	FBtr0339281;FBtr0088827;FBtr0088828	0.412693	0.246714	0.322651	0.764646	0.444482	1
CG12772	FBgn0030055	XLOC_014783	X	FBtr0071221;FBtr0331728	11.5291	0.630732	0.573623	1.09956	0.271524	1
CG12773	FBgn0024365	XLOC_015614	X	FBtr0342738;FBtr0332287;FBtr0070235	82.8027	-0.111929	0.368399	-0.303827	0.76126	0.95812
CG12780	FBgn0033301	XLOC_005374	2R	FBtr0088736	18.4692	-0.710484	0.56862	-1.24949	0.211486	0.66908
CG12783;CG10340		XLOC_013045	3R	FBtr0331688;FBtr0331687;FBtr0083358	4.47325	0.455557	0.587489	0.775431	0.438085	1
CG12788	FBgn0031041	XLOC_016683	X	FBtr0332487;FBtr0100291;FBtr0344071	116.96	0.122067	0.308266	0.39598	0.692119	0.940256
CG12795	FBgn0031535	XLOC_000317	2L	FBtr0113019	35.5139	0.85462	0.475461	1.79745	0.0722636	0.429759
CG12796	FBgn0029909	XLOC_015918	X	FBtr0070973	29.1769	0.00226829	0.498819	0.00454733	0.996372	0.998378
CG12811	FBgn0037779	XLOC_012576	3R	FBtr0082204	3.32838	-0.0190386	0.592334	-0.0321417	0.974359	1
CG12814	FBgn0037796	XLOC_012589	3R	FBtr0337018;FBtr0337019;FBtr0306090;FBtr0110786	2.26254	-0.460592	0.519379	-0.886813	0.375179	1
CG12818	FBgn0037809	XLOC_010605	3R	FBtr0082230	1.40232	-0.2572	0.461143	-0.557744	0.577019	1
CG12822;Atg10		XLOC_003578	2R	FBtr0088842;FBtr0088841;FBtr0113331;FBtr0340658	102.897	0.696667	0.318162	2.18966	0.0285488	0.267547
CG12824	FBgn0033222	XLOC_003572	2R	FBtr0113050;FBtr0088830	4.91199	-0.212918	0.596169	-0.357144	0.720984	1
CG12825	FBgn0033221	XLOC_003571	2R	FBtr0088829	32.8594	0.00864475	0.49512	0.0174599	0.98607	0.995732
CG12831;tRNA:CR30299		XLOC_005242	2R	FBtr0345466;FBtr0089058;FBtr0300063	4.24675	0.848054	0.582989	1.45467	0.145762	1
CG12836	FBgn0033140	XLOC_003520	2R	FBtr0347153	0.592718	-0.244268	0.330703	-0.738634	0.460129	1
CG12848	FBgn0040666	XLOC_006802	2R	FBtr0310371;FBtr0072437	2.91975	-0.145848	0.578176	-0.252255	0.800844	1
CG12851	FBgn0035086	XLOC_005097	2R	FBtr0300763;FBtr0343503;FBtr0345514	112.843	1.2943	0.355396	3.64186	0.000270675	0.00949619
CG12853	FBgn0040747	XLOC_004171	2R	FBtr0087406	14.7311	0.299376	0.560695	0.533937	0.593385	1
CG12857	FBgn0033963	XLOC_005868	2R	FBtr0329881;FBtr0087469	0.26343	-0.205717	0.311207	-0.661028	0.508594	1
CG12858	FBgn0033958	XLOC_005864	2R	FBtr0309056;FBtr0087476	1.17419	-0.0647225	0.401562	-0.161177	0.871954	1
CG12859	FBgn0033961	XLOC_004159	2R	FBtr0087440	6.50517	0.429858	0.604229	0.711415	0.476827	1
CG12860	FBgn0033954	XLOC_005860	2R	FBtr0087480	7.23421	-0.297388	0.353181	-0.842026		1
CG12861	FBgn0033953	XLOC_005859	2R	FBtr0087481	4.56898	-0.293163	0.351553	-0.83391	0.404332	1
CG12862	FBgn0033950	XLOC_005857	2R	FBtr0087484	0.26343	-0.205717	0.311207	-0.661028	0.508594	1
CG12863	FBgn0033948	XLOC_005856	2R	FBtr0087500	11.4634	-0.0207681	0.582201	-0.0356717	0.971544	1
CG12866	FBgn0033955	XLOC_004154	2R	FBtr0339982;FBtr0339981;FBtr0300764;FBtr0300765	1.30182	0.522674	0.435537	1.20007	0.230113	1
CG12868	FBgn0033945	XLOC_005852	2R	FBtr0301735	1.11847	0.23559	0.433733	0.543167	0.587015	1
CG12869	FBgn0033943	XLOC_004135	2R	FBtr0087496;FBtr0339977;FBtr0339978	4.92601	0.181706	0.592526	0.306664	0.759099	1
CG1287	FBgn0037506	XLOC_012374	3R	FBtr0081554	5.02066	-0.549431	0.591359	-0.929099	0.352838	1
CG12877	FBgn0039544	XLOC_011860	3R	FBtr0100446	5.82335	0.217471	0.597372	0.364047	0.715823	1
CG1288	FBgn0250845	XLOC_012347	3R	FBtr0081604;FBtr0334889	1.30182	0.522674	0.435537	1.20007	0.230113	1
CG12880	FBgn0046258	XLOC_011855	3R	FBtr0085217	1.08154	-0.143504	0.428758	-0.334696	0.737854	1
CG12883	FBgn0039538	XLOC_011854	3R	FBtr0085216	5.88824	-0.113101	0.605214	-0.186878	0.851756	1
CG12885	FBgn0039523	XLOC_011843	3R	FBtr0321256;FBtr0085185	0.855038	0.386849	0.389016	0.99443	0.320014	1
CG12895	FBgn0033523	XLOC_005528	2R	FBtr0330615;FBtr0088314	1.82852	-0.332089	0.491104	-0.676209	0.498908	1
CG12898	FBgn0033516	XLOC_005521	2R	FBtr0088321	0.400979	-0.226108	0.3219	-0.702416	0.482419	1
CG12907	FBgn0250840	XLOC_003798	2R	FBtr0305904;FBtr0088351	1.7028	0.276392	0.471867	0.585742	0.558049	1
CG12909	FBgn0033507	XLOC_003796	2R	FBtr0088348	2.83882	0.0797364	0.573954	0.138925	0.88951	1
CG1291	FBgn0035401	XLOC_007059	3L	FBtr0073023	8.37156	0.371301	0.605395	0.61332	0.539665	1
CG12910;CAP		XLOC_003795	2R	FBtr0310141;FBtr0310142;FBtr0088337;FBtr0088338;FBtr0306688;FBtr0299829;FBtr0299825;FBtr0088347;FBtr0088339;FBtr0088340;FBtr0299830;FBtr0336696;FBtr0336695;FBtr0301131;FBtr0306691;FBtr0299826;FBtr0088341;FBtr0336694;FBtr0306690;FBtr0088343;FBtr0088342;FBtr0301965;FBtr0088344;FBtr0088345;FBtr0088346;FBtr0299828	119.098	0.255073	0.3379	0.754879	0.450322	0.855151
CG12911	FBgn0033501	XLOC_003794	2R	FBtr0339451;FBtr0339453;FBtr0339454;FBtr0339452;FBtr0289962;FBtr0088336	7.54811	-0.426826	0.60444	-0.706151	0.480094	1
CG12914;CG12913		XLOC_003793	2R	FBtr0339449;FBtr0339448;FBtr0088334;FBtr0088335;FBtr0339450	331.674	-0.213996	0.234142	-0.91396	0.360738	0.797704
CG12917;Or46a		XLOC_003789	2R	FBtr0290287;FBtr0088330;FBtr0088331	18.2963	0.409788	0.522887	0.783703	0.433215	0.845081
CG12920	FBgn0033481	XLOC_003781	2R	FBtr0088404	139.042	0.0342462	0.333217	0.102774	0.918142	0.989094
CG12923	FBgn0033461	XLOC_003763	2R	FBtr0331953	762.097	0.0855212	0.226394	0.377754	0.705613	0.941763
CG12926	FBgn0033437	XLOC_005459	2R	FBtr0088502	192.415	-0.348346	0.285924	-1.21832	0.223104	0.679257
CG12929	FBgn0033429	XLOC_005454	2R	FBtr0113060;FBtr0088541	85.3601	-0.313258	0.336826	-0.930027	0.352357	0.790672
CG12934	FBgn0033541	XLOC_003813	2R	FBtr0088213;FBtr0339462	12.8515	-0.631362	0.557939	-1.1316	0.257805	1
CG12935	FBgn0033547	XLOC_003820	2R	FBtr0088221;FBtr0332886	253.806	0.206331	0.256044	0.805841	0.420335	0.837761
CG12942	FBgn0033569	XLOC_003834	2R	FBtr0088236	42.2892	0.330833	0.407932	0.810999	0.417366	0.836946
CG12945	FBgn0037755	XLOC_012559	3R	FBtr0334685;FBtr0113214	9.28163	-0.318131	0.604788	-0.526021	0.598874	1
CG12947	FBgn0037753	XLOC_010569	3R	FBtr0113213	1243.67	1.73239	0.228549	7.57992	3.4576e-14	2.36543e-11
CG12950	FBgn0037736	XLOC_012549	3R	FBtr0331695;FBtr0082170	0.705776	0.0577805	0.346215	0.166892	0.867455	1
CG12951	FBgn0037677	XLOC_012504	3R	FBtr0082058	2.71216	0.995262	0.531614	1.87215	0.0611854	1
CG12963	FBgn0034031	XLOC_004212	2R	FBtr0331963;FBtr0113083;FBtr0113082;FBtr0087337;FBtr0331965;FBtr0331964;FBtr0306569;FBtr0306573;FBtr0300777;FBtr0306570;FBtr0306571;FBtr0306568;FBtr0306572	54.0191	0.240105	0.401516	0.597996	0.549843	0.897035
CG12964	FBgn0034022	XLOC_005924	2R	FBtr0340002;FBtr0273307	1.16248	-0.438429	0.41883	-1.04679	0.295194	1
CG12970	FBgn0034047	XLOC_004226	2R	FBtr0308816	8.16846	0.463005	0.594824	0.77839	0.436339	1
CG12971	FBgn0037078	XLOC_010032	3L	FBtr0306795;FBtr0331796	1.17863	-0.0995171	0.397476	-0.250373	0.802299	1
CG12974	FBgn0037065	XLOC_010023	3L	FBtr0345804;FBtr0332860;FBtr0078411;FBtr0078410	21.2223	0.318581	0.495639	0.642769	0.520374	0.885074
CG12975	FBgn0037061	XLOC_010018	3L	FBtr0078309	0.26343	-0.205717	0.311207	-0.661028	0.508594	1
CG12983	FBgn0037040	XLOC_010002	3L	FBtr0333285;FBtr0308681;FBtr0114617;FBtr0114618;FBtr0114616	0.400979	-0.226108	0.3219	-0.702416	0.482419	1
CG12984	FBgn0037042	XLOC_008300	3L	FBtr0078286;FBtr0344990	18.2956	0.597561	0.520911	1.14715	0.251321	0.708213
CG12985	FBgn0030881	XLOC_015314	X	FBtr0074494	86.4944	0.302805	0.363157	0.833815	0.404385	0.829855
CG1299	FBgn0035501	XLOC_007147	3L	FBtr0332658;FBtr0073215	1.56081	0.383871	0.475282	0.80767	0.419281	1
CG12990	FBgn0030859	XLOC_016563	X	FBtr0074479	326.157	0.199383	0.250703	0.795294	0.426442	0.840654
CG12991;CG12992		XLOC_015299	X	FBtr0074448;FBtr0335251;FBtr0335250;FBtr0335249;FBtr0335248;FBtr0074449;FBtr0335254;FBtr0335253;FBtr0335252;FBtr0300778	13.0537	-0.547746	0.556971	-0.983436	0.325393	1
CG12998	FBgn0030829	XLOC_015290	X	FBtr0346183	1.44206	-0.219322	0.453512	-0.483607	0.628665	1
CG13000	FBgn0030807	XLOC_016513	X	FBtr0074416	103.952	0.297112	0.344426	0.862628	0.388342	0.81818
CG13001	FBgn0030806	XLOC_016512	X	FBtr0074417	7.73598	1.18608	0.601344	1.97238	0.0485664	1
CG13002	FBgn0030804	XLOC_015274	X	FBtr0074343	4.78294	-0.182301	0.593199	-0.307318	0.758601	1
CG13003	FBgn0030798	XLOC_016505	X	FBtr0074349;FBtr0331739;FBtr0300431	1.35421	-0.505655	0.440841	-1.14702	0.251372	1
CG13004	FBgn0030797	XLOC_016503	X	FBtr0074351;FBtr0308682;FBtr0112996;FBtr0304152	4.76584	0.843383	0.584399	1.44316	0.148975	1
CG13005	FBgn0030794	XLOC_015268	X	FBtr0074334	6.89254	1.57282	0.604011	2.60397	0.00921517	1
CG13008	FBgn0030780	XLOC_015258	X	FBtr0074322	56.3713	-0.12639	0.415192	-0.304413	0.760813	0.95812
CG13010	FBgn0030770	XLOC_016487	X	FBtr0074373	2.26209	-0.00695507	0.501569	-0.0138666	0.988936	1
CG13012	FBgn0030769	XLOC_016486	X	FBtr0335280;FBtr0290216;FBtr0335281;FBtr0335279	9.09132	0.141222	0.596395	0.236793	0.812817	1
CG13014	FBgn0030759	XLOC_015245	X	FBtr0074282	7.31342	0.28339	0.600384	0.472015	0.636916	1
CG13016	FBgn0033899	XLOC_004098	2R	FBtr0087519	38.5682	0.449745	0.422376	1.0648	0.286968	0.747938
CG13018	FBgn0040751	XLOC_005819	2R	FBtr0087581	3.47274	-0.333754	0.577404	-0.578026	0.563247	1
CG13021	FBgn0029669	XLOC_014502	X	FBtr0070570;FBtr0070571	0.761496	-0.246955	0.332224	-0.743339	0.457276	1
CG13023	FBgn0036677	XLOC_009693	3L	FBtr0345805;FBtr0075307	6.68498	0.259995	0.60519	0.429609	0.66748	1
CG13024	FBgn0036665	XLOC_009690	3L	FBtr0273320;FBtr0305913	28.7479	1.49102	0.465622	3.2022	0.00136382	0.0336224
CG13025	FBgn0036660	XLOC_009687	3L	FBtr0075346;FBtr0333610	46.1707	-0.420122	0.454572	-0.924214	0.355375	0.793864
CG13026	FBgn0036656	XLOC_009684	3L	FBtr0345347;FBtr0299542	0.442345	0.244242	0.321051	0.760758	0.446802	1
CG13029	FBgn0036670	XLOC_008028	3L	FBtr0075336;FBtr0332702	0.400979	-0.226108	0.3219	-0.702416	0.482419	1
CG13031	FBgn0036655	XLOC_008015	3L	FBtr0075319	1.90039	-0.363971	0.486329	-0.748406	0.454215	1
[truncated: 11,583 more rows]

## Sheet: E
Figure 5-Figure supplement 1E
[truncated: 14,045 more rows]
