# Supplementary material for: A TORC1-histone axis regulates chromatin organisation and non-canonical induction of autophagy to ameliorate ageing
Source: eLife. 2021 May 14;10:e62233. doi: 10.7554/eLife.62233 (PMC8186904; doi:10.7554/eLife.62233)
Supplement: Figure 5—figure supplement 2—source data 1. [file elife-62233-fig5-figsupp2-data1.xlsx]

## Sheet: A
Figure 5-Figure supplement 2A
	Control				RU				Rapa				Rapa+RU
bchs	1.04844	0.996859	1.20142	0.753283	0.597006	0.911159	0.745992	0.781972	3.04671	2.23106	2.17434	2.12264	0.763878	0.70375	0.972581	0.824375
DOR	0.978121	0.753137	1.06558	1.20316	1.25926	1.53854	1.50722	1.42673	0.339594	0.346402	0.754984	0.532549	1.34358	1.45241	1.4771	1.37
Stat92E	1.00093	1.3778	0.826238	0.795032	1.25832	1.35327	0.617868	0.35246	0.926318	1.35825	1.62151	1.56555	0.851613	1.06197	1.32841	1.14377
Table Analyzed	his3i bchs analysis
Two-way ANOVA	Ordinary
Alpha	0.05
Source of Variation	% of total variation	P value	P value summary	Significant?
Interaction	22.42	0.0002	***	Yes
Rapa	26.42	<0,0001	****	Yes
RU	41.51	<0,0001	****	Yes
ANOVA table	SS	DF	MS	F (DFn, DFd)	P value
Interaction	1.786	1	1.786	F (1, 12) = 27,9	P=0,0002
Rapa	2.105	1	2.105	F (1, 12) = 32,88	P<0,0001
RU	3.307	1	3.307	F (1, 12) = 51,65	P<0,0001
Residual	0.7683	12	0.06402
Number of missing values	0
Tukey's multiple comparisons test	Mean Diff,	95,00% CI of diff,	Significant?	Summary	Adjusted P Value
EtOH:EtOH vs. EtOH:RU	0.241	-0,2902 to 0,7721	No	ns	0.553
EtOH:EtOH vs. Rapa:EtOH	-1.394	-1,925 to -0,8625	Yes	****	<0,0001
EtOH:EtOH vs. Rapa:RU	0.1839	-0,3473 to 0,715	No	ns	0.7371
EtOH:RU vs. Rapa:EtOH	-1.635	-2,166 to -1,103	Yes	****	<0,0001
EtOH:RU vs. Rapa:RU	-0.05711	-0,5883 to 0,4741	No	ns	0.9882
Rapa:EtOH vs. Rapa:RU	1.578	1,046 to 2,109	Yes	****	<0,0001
Table Analyzed	his3i DOR analysis
Two-way ANOVA	Ordinary
Alpha	0.05
Source of Variation	% of total variation	P value	P value summary	Significant?
Interaction	8.961	0.0082	**	Yes
Rapa	10.68	0.0048	**	Yes
RU	69.62	<0,0001	****	Yes
ANOVA table	SS	DF	MS	F (DFn, DFd)	P value
Interaction	0.2347	1	0.2347	F (1, 12) = 10,01	P=0,0082
Rapa	0.2796	1	0.2796	F (1, 12) = 11,92	P=0,0048
RU	1.823	1	1.823	F (1, 12) = 77,76	P<0,0001
Residual	0.2814	12	0.02345
Number of missing values	0
Tukey's multiple comparisons test	Mean Diff,	95,00% CI of diff,	Significant?	Summary	Adjusted P Value
EtOH:EtOH vs. EtOH:RU	-0.4329	-0,7544 to -0,1115	Yes	**	0.0083
EtOH:EtOH vs. Rapa:EtOH	0.5066	0,1851 to 0,8281	Yes	**	0.0026
EtOH:EtOH vs. Rapa:RU	-0.4108	-0,7323 to -0,08929	Yes	*	0.0118
EtOH:RU vs. Rapa:EtOH	0.9396	0,6181 to 1,261	Yes	****	<0,0001
EtOH:RU vs. Rapa:RU	0.02217	-0,2993 to 0,3436	No	ns	0.9968
Rapa:EtOH vs. Rapa:RU	-0.9174	-1,239 to -0,5959	Yes	****	<0,0001
Table Analyzed	his3i Stat92E analysis
Two-way ANOVA	Ordinary
Alpha	0.05
Source of Variation	% of total variation	P value	P value summary	Significant?
Interaction	1.518	0.6269	ns	No
Rapa	17.62	0.1149	ns	No
RU	7.697	0.2832	ns	No
ANOVA table	SS	DF	MS	F (DFn, DFd)	P value
Interaction	0.02787	1	0.02787	F (1, 12) = 0,2489	P=0,6269
Rapa	0.3236	1	0.3236	F (1, 12) = 2,89	P=0,1149
RU	0.1414	1	0.1414	F (1, 12) = 1,262	P=0,2832
Residual	1.344	12	0.112
Number of missing values	0
Tukey's multiple comparisons test	Mean Diff,	95,00% CI of diff,	Significant?	Summary	Adjusted P Value
Control:Control vs. Control:RU	0.1045	-0,598 to 0,807	No	ns	0.97
Control:Control vs. Rapa:Control	-0.3679	-1,07 to 0,3346	No	ns	0.4379
Control:Control vs. Rapa:RU	-0.09644	-0,7989 to 0,6061	No	ns	0.9761
Control:RU vs. Rapa:Control	-0.4724	-1,175 to 0,2301	No	ns	0.2424
Control:RU vs. Rapa:RU	-0.201	-0,9035 to 0,5015	No	ns	0.8301
Rapa:Control vs. Rapa:RU	0.2715	-0,431 to 0,974	No	ns	0.669

## Sheet: B
Figure 5-Figure supplement 2B
Lysotracker
Control	RU	Rapa	Rapa+RU
20.67	98.33	548.67	127
7.67	30	408.33	145.33
24.33	85.33	913	109
83.67	83.67	354.67	139.67
54.33	55	391	127.33
90	16.67	744.33	108.67
2.33	21.67	536.67	140.67
61.67	136	547.67	108.33
Data: Lmer_test
Models:
number.RU: number ~ RU + (1 | subject)
number.model: number ~ RU + Rapamycin + (1 | subject)
Df AIC BIC logLik deviance Chisq Chi Df Pr(>Chisq)
number.RU 4 1267.8 1278.1 -629.92 1259.8
number.model 5 1248.4 1261.2 -619.18 1238.4 21.483 1 3.571e-06 ***
---
Signif. codes: 0 ‘***’ 0.001 ‘**’ 0.01 ‘*’ 0.05 ‘.’ 0.1 ‘ ’ 1
Data: Lmer_test
Models:
number.Rapamycin: number ~ Rapamycin + (1 | subject)
number.model: number ~ RU + Rapamycin + (1 | subject)
Df AIC BIC logLik deviance Chisq Chi Df Pr(>Chisq)
number.Rapamycin 4 1259.0 1269.2 -625.49 1251.0
number.model 5 1248.4 1261.2 -619.18 1238.4 12.63 1 0.0003797 ***
---
Signif. codes: 0 ‘***’ 0.001 ‘**’ 0.01 ‘*’ 0.05 ‘.’ 0.1 ‘ ’ 1
Data: Lmer_test
Models:
number.model: number ~ RU + Rapamycin + (1 | subject)
number.interaction: number ~ RU * Rapamycin + (1 | subject)
Df AIC BIC logLik deviance Chisq Chi Df Pr(>Chisq)
number.model 5 1248.4 1261.2 -619.18 1238.4
number.interaction 6 1221.2 1236.6 -604.59 1209.2 29.172 1 6.623e-08 ***
---
Signif. codes: 0 ‘***’ 0.001 ‘**’ 0.01 ‘*’ 0.05 ‘.’ 0.1 ‘ ’ 1
$lsmeans
RU Rapamycin lsmean SE df lower.CL upper.CL
Control Control 43.1 35.1 36.6 -27.96 114
RU Control 65.8 35.1 36.6 -5.21 137
Control Rapamycin 555.5 35.1 36.6 484.49 627
RU Rapamycin 125.8 35.1 36.6 54.70 197
Degrees-of-freedom method: kenward-roger
Confidence level used: 0.95
$contrasts
contrast estimate SE df t.ratio p.value
Control,Control - RU,Control -22.8 49.6 36.6 -0.459 0.9674
Control,Control - Control,Rapamycin -512.5 49.6 36.6 -10.338 <.0001
Control,Control - RU,Rapamycin -82.7 49.6 36.6 -1.668 0.3550
RU,Control - Control,Rapamycin -489.7 49.6 36.6 -9.879 <.0001
RU,Control - RU,Rapamycin -59.9 49.6 36.6 -1.209 0.6254
Control,Rapamycin - RU,Rapamycin 429.8 49.6 36.6 8.671 <.0001
P value adjustment: tukey method for comparing a family of 4 estimates
Cyto-ID
Control	RU	Rapa	Rapa+RU
140	69	110	141
41.33	14.33	127.33	110.67
75.33	53	413	310.33
138	60.33	49.33	171.67
121.33	148	7.33	78.67
468.33	388.33	797	56.33
21	295	131.33	16.67
73.33	268.33	173.67	27.33
Data: Lmer_test
Models:
number.RU: number ~ RU + (1 | subject)
number.model: number ~ RU + Rapamycin + (1 | subject)
Df AIC BIC logLik deviance Chisq Chi Df Pr(>Chisq)
number.RU 4 1317.0 1327.3 -654.51 1309.0
number.model 5 1318.9 1331.7 -654.44 1308.9 0.1408 1 0.7075
Data: Lmer_test
Models:
number.Rapamycin: number ~ Rapamycin + (1 | subject)
number.model: number ~ RU + Rapamycin + (1 | subject)
Df AIC BIC logLik deviance Chisq Chi Df Pr(>Chisq)
number.Rapamycin 4 1317.4 1327.7 -654.71 1309.4
number.model 5 1318.9 1331.7 -654.44 1308.9 0.5364 1 0.4639
Data: Lmer_test
Models:
number.model: number ~ RU + Rapamycin + (1 | subject)
number.interaction: number ~ RU * Rapamycin + (1 | subject)
Df AIC BIC logLik deviance Chisq Chi Df Pr(>Chisq)
number.model 5 1318.9 1331.7 -654.44 1308.9
number.interaction 6 1319.4 1334.8 -653.69 1307.4 1.4918 1 0.2219
$lsmeans
RU Rapamycin lsmean SE df lower.CL upper.CL
Control Control 135 60.2 36.6 12.74 257
RU Control 162 60.2 36.6 39.95 284
Control Rapamycin 226 60.2 36.6 104.03 348
RU Rapamycin 114 60.2 36.6 -8.01 236
Degrees-of-freedom method: kenward-roger
Confidence level used: 0.95
$contrasts
contrast estimate SE df t.ratio p.value
Control,Control - RU,Control -27.2 85.2 36.6 -0.319 0.9885
Control,Control - Control,Rapamycin -91.3 85.2 36.6 -1.072 0.7086
Control,Control - RU,Rapamycin 20.8 85.2 36.6 0.244 0.9948
RU,Control - Control,Rapamycin -64.1 85.2 36.6 -0.752 0.8751
RU,Control - RU,Rapamycin 48.0 85.2 36.6 0.563 0.9424
Control,Rapamycin - RU,Rapamycin 112.0 85.2 36.6 1.315 0.5593
P value adjustment: tukey method for comparing a family of 4 estimates

## Sheet: C
Figure 5-Figure supplement 2C
Control	RU	Rapa	Rapa+RU
13	25.8	33	20.1
13.5	15.5	30.1	25.9
24.1	4	46.6	24.2
14.7	5.2	31.2	15
23.3	16.8	22.8	6.7
18.9	8.1	18.2	5.4
23.3	10.8	38.4	30.8
12.4	9.3	18.2	24.3
20.9	11.6	21.7	15.1
25.5	7.3	33.2	19.1
Data: Lmer_test
Models:
ratio.RU: ratio ~ RU + (1 | subject)
ratio.model: ratio ~ RU + Rapamycin + (1 | subject)
Df AIC BIC logLik deviance Chisq Chi Df Pr(>Chisq)
ratio.RU 4 867.95 879.03 -429.97 859.95
ratio.model 5 857.57 871.43 -423.79 847.57 12.372 1 0.0004357 ***
---
Signif. codes: 0 ‘***’ 0.001 ‘**’ 0.01 ‘*’ 0.05 ‘.’ 0.1 ‘ ’ 1
Data: Lmer_test
Models:
ratio.Rapamycin: ratio ~ Rapamycin + (1 | subject)
ratio.model: ratio ~ RU + Rapamycin + (1 | subject)
Df AIC BIC logLik deviance Chisq Chi Df Pr(>Chisq)
ratio.Rapamycin 4 870.65 881.73 -431.33 862.65
ratio.model 5 857.57 871.43 -423.79 847.57 15.075 1 0.0001033 ***
---
Signif. codes: 0 ‘***’ 0.001 ‘**’ 0.01 ‘*’ 0.05 ‘.’ 0.1 ‘ ’ 1
Data: Lmer_test
Models:
ratio.model: ratio ~ RU + Rapamycin + (1 | subject)
ratio.interaction: ratio ~ RU * Rapamycin + (1 | subject)
Df AIC BIC logLik deviance Chisq Chi Df Pr(>Chisq)
ratio.model 5 857.57 871.43 -423.79 847.57
ratio.interaction 6 859.30 875.93 -423.65 847.30 0.2718 1 0.6021
$lsmeans
RU Rapamycin lsmean SE df lower.CL upper.CL
Control Control 19.0 2.16 43.9 14.60 23.3
RU Control 11.4 2.16 43.9 7.08 15.8
Control Rapamycin 28.0 2.26 39.4 23.44 32.6
RU Rapamycin 18.4 2.12 49.6 14.11 22.6
Degrees-of-freedom method: kenward-roger
Confidence level used: 0.95
$contrasts
contrast estimate SE df t.ratio p.value
Control,Control - RU,Control 7.519 3.05 43.9 2.464 0.0801
Control,Control - Control,Rapamycin -9.063 3.13 41.5 -2.899 0.0292
Control,Control - RU,Rapamycin 0.584 3.02 46.6 0.193 0.9974
RU,Control - Control,Rapamycin -16.582 3.13 41.5 -5.305 <.0001
RU,Control - RU,Rapamycin -6.935 3.02 46.6 -2.293 0.1143
Control,Rapamycin - RU,Rapamycin 9.647 3.05 49.6 3.165 0.0137
P value adjustment: tukey method for comparing a family of 4 estimates

## Sheet: D
Figure 5-Figure supplement 2D
Control	RU	Rapamycin	Rapamycin+RU
11.11	10	5.26	12.5
6.25	5.26	0	6.67
11.76	10.53	0	11.11
17.65	20	5.26	17.65
6.67	11.11	0	5.26
11.11	6.67	0	6.25
0	11.11	0	0
12.5	11.76	0	11.11
16.67	17.65	0	13.33
5.56	6.25	0	5.88
Df Sum Sq Mean Sq F value Pr(>F)
Rapamycin 1 0.02988 0.029878 14.583 0.00051 ***
RU 1 0.02039 0.020388 9.951 0.00324 **
Rapamycin:RU 1 0.01162 0.011618 5.670 0.02266 *
Residuals 36 0.07376 0.002049
---
Signif. codes: 0 ‘***’ 0.001 ‘**’ 0.01 ‘*’ 0.05 ‘.’ 0.1 ‘ ’ 1
Tukey multiple comparisons of means
95% family-wise confidence level
Fit: aov(formula = number ~ Rapamycin * RU, data = ANOVA_test)
$Rapamycin
diff lwr upr p adj
Rapamycin-Control -0.05466095 -0.08369108 -0.02563082 0.0005099
$RU
diff lwr upr p adj
RU-Control 0.04515286 0.01612273 0.074183 0.0032402
$`Rapamycin:RU`
diff lwr upr p adj
Rapamycin:Control-Control:Control -0.088746560 -0.14326569 -0.03422743 0.0005403
Control:RU-Control:Control 0.011067251 -0.04345188 0.06558638 0.9468354
Rapamycin:RU-Control:Control -0.009508084 -0.06402721 0.04501104 0.9652307
Control:RU-Rapamycin:Control 0.099813811 0.04529468 0.15433294 0.0001057
Rapamycin:RU-Rapamycin:Control 0.079238476 0.02471935 0.13375760 0.0020997
Rapamycin:RU-Control:RU -0.020575335 -0.07509446 0.03394379 0.7409707
