# Supplementary material for: A TORC1-histone axis regulates chromatin organisation and non-canonical induction of autophagy to ameliorate ageing
Source: eLife. 2021 May 14;10:e62233. doi: 10.7554/eLife.62233 (PMC8186904; doi:10.7554/eLife.62233)
Supplement: Figure 5—figure supplement 3—source data 1. [file elife-62233-fig5-figsupp3-data1.xlsx]

## Sheet: A
Figure 5-Figure supplement 3A
Control	RU	Ra	Ra+RU
1.21512	1.18016	0.206769	0.231221
0.830085	1.08781	0.191669	0.245766
0.823375	0.922693	0.202461	0.186244
1.13142	1.36281	0.374593	0.350123
Df Sum Sq Mean Sq F value Pr(>F)
RU 1 0.0219 0.0219 1.000 0.337
Rapamycin 1 2.6934 2.6934 123.301 1.14e-07 ***
RU:Rapamycin 1 0.0166 0.0166 0.761 0.400
Residuals 12 0.2621 0.0218
---
Signif. codes: 0 ‘***’ 0.001 ‘**’ 0.01 ‘*’ 0.05 ‘.’ 0.1 ‘ ’ 1
Tukey multiple comparisons of means
95% family-wise confidence level
Fit: aov(formula = Intensity ~ RU * Rapamycin, data = ANOVA_test_H3)
$RU
diff lwr upr p adj
RU-Control 0.07391622 -0.08709507 0.2349275 0.3369385
$Rapamycin
diff lwr upr p adj
Rapamycin-Control -0.8205779 -0.9815892 -0.6595666 1e-07
$`RU:Rapamycin`
diff lwr upr p adj
RU:Control-Control:Control 0.138367086 -0.1719082 0.4486423 0.5661547
Control:Rapamycin-Control:Control -0.756127006 -1.0664023 -0.4458518 0.0000532
RU:Rapamycin-Control:Control -0.746661648 -1.0569369 -0.4363864 0.0000602
Control:Rapamycin-RU:Control -0.894494092 -1.2047693 -0.5842188 0.0000097
RU:Rapamycin-RU:Control -0.885028734 -1.1953040 -0.5747535 0.0000109
RU:Rapamycin-Control:Rapamycin 0.009465358 -0.3008099 0.3197406 0.9997180
