# Supplementary material for: A TORC1-histone axis regulates chromatin organisation and non-canonical induction of autophagy to ameliorate ageing
Source: eLife. 2021 May 14;10:e62233. doi: 10.7554/eLife.62233 (PMC8186904; doi:10.7554/eLife.62233)
Supplement: Figure 5—source data 1. [file elife-62233-fig5-data1.xlsx]

## Sheet: A
Figure 5A
	Control				RU				Rapa				Rapa+RU
bchs	1.24209	0.973763	0.881533	0.902616	1.37071	1.3562	1.71032	1.38743	1.4156	1.26335	1.40542	1.56	1.61718	1.38105	1.95782	1.53099
DOR	1.17	0.728623	0.904313	1.19706	0.620528	0.445703	0.636063	0.496229	0.579516	0.407308	0.376598	0.608333	0.642514	0.665444	0.777448	0.51325
Stat92E	0.99495	1.01803	1.24292	0.744093	0.965072	0.941538	1.04334	0.926176	0.843307	0.788072	0.885408	0.827992	0.839041	0.882308	0.928201	0.886617
Table Analyzed	his3+4OE bchs analysis
Two-way ANOVA	Ordinary
Alpha	0.05
Source of Variation	% of total variation	P value	P value summary	Significant?
Interaction	4.899	0.1997	ns	No
RU	36.15	0.0031	**	Yes
Rapamycin	27.04	0.0078	**	Yes
ANOVA table	SS	DF	MS	F (DFn, DFd)	P value
Interaction	0.06027	1	0.06027	F (1, 12) = 1,842	P=0,1997
RU	0.4447	1	0.4447	F (1, 12) = 13,59	P=0,0031
Rapamycin	0.3326	1	0.3326	F (1, 12) = 10,16	P=0,0078
Residual	0.3926	12	0.03272
Number of missing values	0
Tukey's multiple comparisons test	Mean Diff,	95,00% CI of diff,	Significant?	Summary	Adjusted P Value
Control:Control vs. Control:Rapamycin	-0.4111	-0,7908 to -0,03136	Yes	*	0.0327
Control:Control vs. RU:Control	-0.4562	-0,8359 to -0,07643	Yes	*	0.0176
Control:Control vs. RU:Rapamycin	-0.6218	-1,001 to -0,242	Yes	**	0.0019
Control:Rapamycin vs. RU:Control	-0.04507	-0,4248 to 0,3347	No	ns	0.9843
Control:Rapamycin vs. RU:Rapamycin	-0.2107	-0,5904 to 0,1691	No	ns	0.3909
RU:Control vs. RU:Rapamycin	-0.1656	-0,5453 to 0,2141	No	ns	0.5831
Table Analyzed	his3+4OE DOR analysis
Two-way ANOVA	Ordinary
Alpha	0.05
Source of Variation	% of total variation	P value	P value summary	Significant?
Interaction	42.17	0.0013	**	Yes
RU	9.865	0.0663	ns	No
Rapamycin	18.95	0.016	*	Yes
ANOVA table	SS	DF	MS	F (DFn, DFd)	P value
Interaction	0.3686	1	0.3686	F (1, 12) = 17,44	P=0,0013
RU	0.08623	1	0.08623	F (1, 12) = 4,08	P=0,0663
Rapamycin	0.1657	1	0.1657	F (1, 12) = 7,839	P=0,0160
Residual	0.2536	12	0.02113
Number of missing values	0
Tukey's multiple comparisons test	Mean Diff,	95,00% CI of diff,	Significant?	Summary	Adjusted P Value
Control:Control vs. Control:Rapamycin	0.5071	0,2019 to 0,8122	Yes	**	0.0017
Control:Control vs. RU:Control	0.4504	0,1452 to 0,7556	Yes	**	0.0043
Control:Control vs. RU:Rapamycin	0.3503	0,04515 to 0,6555	Yes	*	0.0233
Control:Rapamycin vs. RU:Control	-0.05669	-0,3619 to 0,2485	No	ns	0.9444
Control:Rapamycin vs. RU:Rapamycin	-0.1567	-0,4619 to 0,1485	No	ns	0.4539
RU:Control vs. RU:Rapamycin	-0.1	-0,4052 to 0,2052	No	ns	0.7669
Table Analyzed	his3+4OE Stat92E analysis
Two-way ANOVA	Ordinary
Alpha	0.05
Source of Variation	% of total variation	P value	P value summary	Significant?
Interaction	2.955	0.4823	ns	No
RU	0.1355	0.8792	ns	No
Rapamycin	29.45	0.041	*	Yes
ANOVA table	SS	DF	MS	F (DFn, DFd)	P value
Interaction	0.006212	1	0.006212	F (1, 12) = 0,5256	P=0,4823
RU	0.0002849	1	0.0002849	F (1, 12) = 0,0241	P=0,8792
Rapamycin	0.0619	1	0.0619	F (1, 12) = 5,237	P=0,0410
Residual	0.1418	12	0.01182
Number of missing values	0
Tukey's multiple comparisons test	Mean Diff,	95,00% CI of diff,	Significant?	Summary	Adjusted P Value
Control:Control vs. Control:Rapamycin	0.1638	-0,06442 to 0,392	No	ns	0.1984
Control:Control vs. RU:Control	0.03097	-0,1973 to 0,2592	No	ns	0.9769
Control:Control vs. RU:Rapamycin	0.116	-0,1123 to 0,3442	No	ns	0.4626
Control:Rapamycin vs. RU:Control	-0.1328	-0,3611 to 0,09539	No	ns	0.3521
Control:Rapamycin vs. RU:Rapamycin	-0.04785	-0,2761 to 0,1804	No	ns	0.9229
RU:Control vs. RU:Rapamycin	0.08499	-0,1432 to 0,3132	No	ns	0.693

## Sheet: B
Figure 5B
H3K4me3
	Control			RU			Rapa			Rapa+RU
Bchs	0.41	0.22	0.23	1.35	1.18	1.05	1.9	1.19	1.1	1.71	1.04	1.1
DOR	0.38	0.17	0.1	0.39	0.26	0.11	0.39	0.53	0.12	0.26	0.42	0.16
Stat92E	0.6	0.17	0.16	0.27	0.23	0.09	0.69	0.32	0.25	0.51	0.36	0.31
Table Analyzed	2way K4 normalised to H3 Bchs
Two-way ANOVA	Ordinary
Alpha	0.05
Source of Variation	% of total variation	P value	P value summary	Significant?
Interaction	42.72	0.0037	**	Yes
Rapa	21.3	0.0214	*	Yes
RU	15.02	0.0435	*	Yes
ANOVA table	SS	DF	MS	F (DFn, DFd)	P value
Interaction	0.07038	1	0.07038	F (1, 8) = 16,31	P=0,0037
Rapa	0.0351	1	0.0351	F (1, 8) = 8,134	P=0,0214
RU	0.02475	1	0.02475	F (1, 8) = 5,736	P=0,0435
Residual	0.03452	8	0.004315
Number of missing values	0
Tukey's multiple comparisons test	Mean Diff,	95,00% CI of diff,	Significant?	Summary	Adjusted P Value
Control:Control vs. Control:RU	-0.244	-0,4158 to -0,07224	Yes	**	0.0081
Control:Control vs. Rapa:Control	-0.2613	-0,4331 to -0,08958	Yes	**	0.0054
Control:Control vs. Rapa:RU	-0.199	-0,3708 to -0,02724	Yes	*	0.0247
Control:RU vs. Rapa:Control	-0.01733	-0,1891 to 0,1544	No	ns	0.9875
Control:RU vs. Rapa:RU	0.045	-0,1268 to 0,2168	No	ns	0.8348
Rapa:Control vs. Rapa:RU	0.06233	-0,1094 to 0,2341	No	ns	0.6648
Table Analyzed	2way K4 normalised to H3 DOR
Two-way ANOVA	Ordinary
Alpha	0.05
Source of Variation	% of total variation	P value	P value summary	Significant?
Interaction	2.949	0.602	ns	No
Rapa	4.5	0.5214	ns	No
RU	12.5	0.2962	ns	No
ANOVA table	SS	DF	MS	F (DFn, DFd)	P value
Interaction	9.633e-05	1	9.633e-05	F (1, 8) = 0,2947	P=0,6020
Rapa	0.000147	1	0.000147	F (1, 8) = 0,4497	P=0,5214
RU	0.0004083	1	0.0004083	F (1, 8) = 1,249	P=0,2962
Residual	0.002615	8	0.0003269
Number of missing values	0
Tukey's multiple comparisons test	Mean Diff,	95,00% CI of diff,	Significant?	Summary	Adjusted P Value
Control:Control vs. Control:RU	0.006	-0,04128 to 0,05328	No	ns	0.9758
Control:Control vs. Rapa:Control	-0.01267	-0,05994 to 0,03461	No	ns	0.8258
Control:Control vs. Rapa:RU	0.004667	-0,04261 to 0,05194	No	ns	0.9882
Control:RU vs. Rapa:Control	-0.01867	-0,06594 to 0,02861	No	ns	0.6076
Control:RU vs. Rapa:RU	-0.001333	-0,04861 to 0,04594	No	ns	0.9997
Rapa:Control vs. Rapa:RU	0.01733	-0,02994 to 0,06461	No	ns	0.6581
Table Analyzed	2way K4 normalised to H3 Stat92E
Two-way ANOVA	Ordinary
Alpha	0.05
Source of Variation	% of total variation	P value	P value summary	Significant?
Interaction	4.398	0.5002	ns	No
Rapa	3.935	0.523	ns	No
RU	21.08	0.1608	ns	No
ANOVA table	SS	DF	MS	F (DFn, DFd)	P value
Interaction	0.001027	1	0.001027	F (1, 8) = 0,4984	P=0,5002
Rapa	0.0009187	1	0.0009187	F (1, 8) = 0,446	P=0,5230
RU	0.004921	1	0.004921	F (1, 8) = 2,389	P=0,1608
Residual	0.01648	8	0.00206
Number of missing values	0
Tukey's multiple comparisons test	Mean Diff,	95,00% CI of diff,	Significant?	Summary	Adjusted P Value
Control:Control vs. Control:RU	0.059	-0,05968 to 0,1777	No	ns	0.4338
Control:Control vs. Rapa:Control	0.001	-0,1177 to 0,1197	No	ns	>0,9999
Control:Control vs. Rapa:RU	0.023	-0,09568 to 0,1417	No	ns	0.9226
Control:RU vs. Rapa:Control	-0.058	-0,1767 to 0,06068	No	ns	0.4471
Control:RU vs. Rapa:RU	-0.036	-0,1547 to 0,08268	No	ns	0.7689
Rapa:Control vs. Rapa:RU	0.022	-0,09668 to 0,1407	No	ns	0.9312
H3K9me3
	Control			RU			Rapa			Rapa+RU
Bchs	0.16	0.14	0.36	0.46	0.15	0.06	0.62	0.21	0.25	0.65	0.27	0.49
DOR	0.28	0.11	0.09	1.12	1.27	0.76	1.42	1.14	1.25	1.67	0.79	0.84
Stat92E	0.09	0.1	0.13	0.21	0.19	0.08	0.34	0.3	0.17	0.35	0.31	0.2
Table Analyzed	2way K9 normalised to H3 Bchs
Two-way ANOVA	Ordinary
Alpha	0.05
Source of Variation	% of total variation	P value	P value summary	Significant?
Interaction	0.2123	0.844	ns	No
Rapa	53.6	0.0121	*	Yes
RU	5.075	0.3494	ns	No
ANOVA table	SS	DF	MS	F (DFn, DFd)	P value
Interaction	2.7e-05	1	2.7e-05	F (1, 8) = 0,04132	P=0,8440
Rapa	0.006816	1	0.006816	F (1, 8) = 10,43	P=0,0121
RU	0.0006453	1	0.0006453	F (1, 8) = 0,9876	P=0,3494
Residual	0.005227	8	0.0006534
Number of missing values	0
Tukey's multiple comparisons test	Mean Diff,	95,00% CI of diff,	Significant?	Summary	Adjusted P Value
Control:Control vs. Control:RU	-0.01767	-0,0845 to 0,04917	No	ns	0.8313
Control:Control vs. Rapa:Control	-0.05067	-0,1175 to 0,01617	No	ns	0.1486
Control:Control vs. Rapa:RU	-0.06233	-0,1292 to 0,004504	No	ns	0.0678
Control:RU vs. Rapa:Control	-0.033	-0,09984 to 0,03384	No	ns	0.4392
Control:RU vs. Rapa:RU	-0.04467	-0,1115 to 0,02217	No	ns	0.2197
Rapa:Control vs. Rapa:RU	-0.01167	-0,0785 to 0,05517	No	ns	0.9415
Table Analyzed	2way K9 normalised to H3 DOR
Two-way ANOVA	Ordinary
Alpha	0.05
Source of Variation	% of total variation	P value	P value summary	Significant?
Interaction	37.58	0.0077	**	Yes
Rapa	34.15	0.0098	**	Yes
RU	4.219	0.2701	ns	No
ANOVA table	SS	DF	MS	F (DFn, DFd)	P value
Interaction	0.01235	1	0.01235	F (1, 8) = 12,5	P=0,0077
Rapa	0.01122	1	0.01122	F (1, 8) = 11,36	P=0,0098
RU	0.001387	1	0.001387	F (1, 8) = 1,404	P=0,2701
Residual	0.007904	8	0.000988
Number of missing values	0
Tukey's multiple comparisons test	Mean Diff,	95,00% CI of diff,	Significant?	Summary	Adjusted P Value
Control:Control vs. Control:RU	-0.08567	-0,1679 to -0,00348	Yes	*	0.0413
Control:Control vs. Rapa:Control	-0.1253	-0,2075 to -0,04315	Yes	**	0.0053
Control:Control vs. Rapa:RU	-0.08267	-0,1649 to -0,0004799	Yes	*	0.0487
Control:RU vs. Rapa:Control	-0.03967	-0,1219 to 0,04252	No	ns	0.4568
Control:RU vs. Rapa:RU	0.003	-0,07919 to 0,08519	No	ns	0.9994
Rapa:Control vs. Rapa:RU	0.04267	-0,03952 to 0,1249	No	ns	0.4002
Table Analyzed	2way K9 normalised to H3 Stat92E
Two-way ANOVA	Ordinary
Alpha	0.05
Source of Variation	% of total variation	P value	P value summary	Significant?
Interaction	0.8935	0.7701	ns	No
Rapa	18.09	0.2107	ns	No
RU	2.849	0.6039	ns	No
ANOVA table	SS	DF	MS	F (DFn, DFd)	P value
Interaction	6.533e-05	1	6.533e-05	F (1, 8) = 0,09145	P=0,7701
Rapa	0.001323	1	0.001323	F (1, 8) = 1,852	P=0,2107
RU	0.0002083	1	0.0002083	F (1, 8) = 0,2916	P=0,6039
Residual	0.005715	8	0.0007144
Number of missing values	0
Tukey's multiple comparisons test	Mean Diff,	95,00% CI of diff,	Significant?	Summary	Adjusted P Value
Control:Control vs. Control:RU	0.003667	-0,06622 to 0,07355	No	ns	0.9982
Control:Control vs. Rapa:Control	-0.02567	-0,09555 to 0,04422	No	ns	0.657
Control:Control vs. Rapa:RU	-0.01267	-0,08255 to 0,05722	No	ns	0.9352
Control:RU vs. Rapa:Control	-0.02933	-0,09922 to 0,04055	No	ns	0.5634
Control:RU vs. Rapa:RU	-0.01633	-0,08622 to 0,05355	No	ns	0.8749
Rapa:Control vs. Rapa:RU	0.013	-0,05689 to 0,08289	No	ns	0.9306
H3K27me3
	Control			RU			Rapa			Rapa+RU
Bchs	0.17	0.1	0.34	0.63	0.27	0.1	0.53	0.32	0.47	0.55	0.51	0.34
DOR	0.06	0.14	0.23	1.6	0.45	0.93	1.89	1.63	1.117	2.18	0.96	1.15
Stat92E	0.1	0.03	0.04	0.27	0.1	0.06	0.47	0.31	0.24	0.31	0.24	0.2
Table Analyzed	2way K27 normalised to H3 Bchs
Two-way ANOVA	Ordinary
Alpha	0.05
Source of Variation	% of total variation	P value	P value summary	Significant?
Interaction	14.49	0.0347	*	Yes
Rapa	59.2	0.0009	***	Yes
RU	8.345	0.09	ns	No
ANOVA table	SS	DF	MS	F (DFn, DFd)	P value
Interaction	0.001657	1	0.001657	F (1, 8) = 6,455	P=0,0347
Rapa	0.006769	1	0.006769	F (1, 8) = 26,37	P=0,0009
RU	0.0009541	1	0.0009541	F (1, 8) = 3,717	P=0,0900
Residual	0.002053	8	0.0002567
Number of missing values	0
Tukey's multiple comparisons test	Mean Diff,	95,00% CI of diff,	Significant?	Summary	Adjusted P Value
Control:Control vs. Control:RU	-0.04133	-0,08322 to 0,0005565	No	ns	0.0531
Control:Control vs. Rapa:Control	-0.071	-0,1129 to -0,02911	Yes	**	0.0028
Control:Control vs. Rapa:RU	-0.06533	-0,1072 to -0,02344	Yes	**	0.0047
Control:RU vs. Rapa:Control	-0.02967	-0,07156 to 0,01222	No	ns	0.185
Control:RU vs. Rapa:RU	-0.024	-0,06589 to 0,01789	No	ns	0.3255
Rapa:Control vs. Rapa:RU	0.005667	-0,03622 to 0,04756	No	ns	0.971
Table Analyzed	2way K27 normalised to H3 DOR
Two-way ANOVA	Ordinary
Alpha	0.05
Source of Variation	% of total variation	P value	P value summary	Significant?
Interaction	16.5	0.0548	ns	No
Rapa	56.74	0.0031	**	Yes
RU	0.6205	0.6745	ns	No
ANOVA table	SS	DF	MS	F (DFn, DFd)	P value
Interaction	0.009075	1	0.009075	F (1, 8) = 5,049	P=0,0548
Rapa	0.03121	1	0.03121	F (1, 8) = 17,36	P=0,0031
RU	0.0003413	1	0.0003413	F (1, 8) = 0,1899	P=0,6745
Residual	0.01438	8	0.001797
Number of missing values	0
Tukey's multiple comparisons test	Mean Diff,	95,00% CI of diff,	Significant?	Summary	Adjusted P Value
Control:Control vs. Control:RU	-0.06567	-0,1765 to 0,04519	No	ns	0.3012
Control:Control vs. Rapa:Control	-0.157	-0,2679 to -0,04615	Yes	**	0.0083
Control:Control vs. Rapa:RU	-0.1127	-0,2235 to -0,001814	Yes	*	0.0464
Control:RU vs. Rapa:Control	-0.09133	-0,2022 to 0,01952	No	ns	0.1108
Control:RU vs. Rapa:RU	-0.047	-0,1579 to 0,06385	No	ns	0.5559
Rapa:Control vs. Rapa:RU	0.04433	-0,06652 to 0,1552	No	ns	0.5985
Table Analyzed	2way K27 normalised to H3 Stat92E
Two-way ANOVA	Ordinary
Alpha	0.05
Source of Variation	% of total variation	P value	P value summary	Significant?
Interaction	15.34	0.0807	ns	No
Rapa	51.45	0.0064	**	Yes
RU	2.487	0.4442	ns	No
ANOVA table	SS	DF	MS	F (DFn, DFd)	P value
Interaction	0.001976	1	0.001976	F (1, 8) = 3,995	P=0,0807
Rapa	0.006627	1	0.006627	F (1, 8) = 13,4	P=0,0064
RU	0.0003203	1	0.0003203	F (1, 8) = 0,6476	P=0,4442
Residual	0.003957	8	0.0004947
Number of missing values	0
Tukey's multiple comparisons test	Mean Diff,	95,00% CI of diff,	Significant?	Summary	Adjusted P Value
Control:Control vs. Control:RU	-0.01533	-0,07349 to 0,04282	No	ns	0.8323
Control:Control vs. Rapa:Control	-0.07267	-0,1308 to -0,01451	Yes	*	0.0166
Control:Control vs. Rapa:RU	-0.03667	-0,09482 to 0,02149	No	ns	0.2576
Control:RU vs. Rapa:Control	-0.05733	-0,1155 to 0,0008207	No	ns	0.0533
Control:RU vs. Rapa:RU	-0.02133	-0,07949 to 0,03682	No	ns	0.6578
Rapa:Control vs. Rapa:RU	0.036	-0,02215 to 0,09415	No	ns	0.2701
HP1
	Control			RU			Rapa			Rapa+RU
Bchs	0.55	0.47	0.32	0.11	0.1	0.04	0.03	0.09	0.07	0.15	0.1	0.09
DOR	0.08	0.03	0.07	0.2	0.12	0.38	0.32	0.29	0.2	0.24	0.13	0.22
Stat92E	0.06	0.05	0.01	0.16	0.09	0.01	0.09	0.21	0.09	0.08	0.01	0.07
Table Analyzed	2way HP1 bchs
Two-way ANOVA	Ordinary
Alpha	0.05
Source of Variation	% of total variation	P value	P value summary	Significant?
Interaction	38.89	0.0006	***	Yes
Rapa	28.42	0.0016	**	Yes
RU	22.35	0.0032	**	Yes
ANOVA table	SS	DF	MS	F (DFn, DFd)	P value
Interaction	0.1281	1	0.1281	F (1, 8) = 30,09	P=0,0006
Rapa	0.09363	1	0.09363	F (1, 8) = 21,99	P=0,0016
RU	0.07363	1	0.07363	F (1, 8) = 17,29	P=0,0032
Residual	0.03407	8	0.004258
Number of missing values	0
Tukey's multiple comparisons test	Mean Diff,	95,00% CI of diff,	Significant?	Summary	Adjusted P Value
Control:Control vs. Control:RU	0.3633	0,1927 to 0,534	Yes	***	0.0006
Control:Control vs. Rapa:Control	0.3833	0,2127 to 0,554	Yes	***	0.0004
Control:Control vs. Rapa:RU	0.3333	0,1627 to 0,504	Yes	**	0.0011
Control:RU vs. Rapa:Control	0.02	-0,1506 to 0,1906	No	ns	0.9807
Control:RU vs. Rapa:RU	-0.03	-0,2006 to 0,1406	No	ns	0.9403
Rapa:Control vs. Rapa:RU	-0.05	-0,2206 to 0,1206	No	ns	0.786
Table Analyzed	2way HP1 DOR
Two-way ANOVA	Ordinary
Alpha	0.05
Source of Variation	% of total variation	P value	P value summary	Significant?
Interaction	35.88	0.0287	*	Yes
Rapa	17.71	0.0984	ns	No
RU	5.896	0.312	ns	No
ANOVA table	SS	DF	MS	F (DFn, DFd)	P value
Interaction	0.04563	1	0.04563	F (1, 8) = 7,084	P=0,0287
Rapa	0.02253	1	0.02253	F (1, 8) = 3,498	P=0,0984
RU	0.0075	1	0.0075	F (1, 8) = 1,164	P=0,3120
Residual	0.05153	8	0.006442
Number of missing values	0
Tukey's multiple comparisons test	Mean Diff,	95,00% CI of diff,	Significant?	Summary	Adjusted P Value
Control:Control vs. Control:RU	-0.1733	-0,3832 to 0,03652	No	ns	0.1097
Control:Control vs. Rapa:Control	-0.21	-0,4199 to -0,0001434	Yes	*	0.0498
Control:Control vs. Rapa:RU	-0.1367	-0,3465 to 0,07319	No	ns	0.2362
Control:RU vs. Rapa:Control	-0.03667	-0,2465 to 0,1732	No	ns	0.9413
Control:RU vs. Rapa:RU	0.03667	-0,1732 to 0,2465	No	ns	0.9413
Rapa:Control vs. Rapa:RU	0.07333	-0,1365 to 0,2832	No	ns	0.6889
Table Analyzed	2way HP1 Stat92E
Two-way ANOVA	Ordinary
Alpha	0.05
Source of Variation	% of total variation	P value	P value summary	Significant?
Interaction	28.79	0.0932	ns	No
Rapa	6.078	0.4068	ns	No
RU	1.703	0.6553	ns	No
ANOVA table	SS	DF	MS	F (DFn, DFd)	P value
Interaction	0.01141	1	0.01141	F (1, 8) = 3,631	P=0,0932
Rapa	0.002408	1	0.002408	F (1, 8) = 0,7666	P=0,4068
RU	0.000675	1	0.000675	F (1, 8) = 0,2149	P=0,6553
Residual	0.02513	8	0.003142
Number of missing values	0
Tukey's multiple comparisons test	Mean Diff,	95,00% CI of diff,	Significant?	Summary	Adjusted P Value
Control:Control vs. Control:RU	-0.04667	-0,1932 to 0,09989	No	ns	0.7433
Control:Control vs. Rapa:Control	-0.09	-0,2366 to 0,05656	No	ns	0.2757
Control:Control vs. Rapa:RU	-0.01333	-0,1599 to 0,1332	No	ns	0.9907
Control:RU vs. Rapa:Control	-0.04333	-0,1899 to 0,1032	No	ns	0.7817
Control:RU vs. Rapa:RU	0.03333	-0,1132 to 0,1799	No	ns	0.8831
Rapa:Control vs. Rapa:RU	0.07667	-0,06989 to 0,2232	No	ns	0.3943

## Sheet: C
Figure 5C
Ref(2)P/ total proteins
Control	RU	Ra	Ra+RU
1.16138	0.675468	0.829398	0.525497
1.13034	0.616303	0.616265	0.643737
0.972806	0.351387	0.408127	0.417784
0.735473	0.505806	0.354344	0.283998
Df Sum Sq Mean Sq F value Pr(>F)
RU 1 0.2896 0.28963 9.182 0.0105 *
Rapamycin 1 0.2587 0.25866 8.200 0.0143 *
RU:Rapamycin 1 0.1500 0.15003 4.756 0.0498 *
Residuals 12 0.3785 0.03154
---
Signif. codes: 0 ‘***’ 0.001 ‘**’ 0.01 ‘*’ 0.05 ‘.’ 0.1 ‘ ’ 1
Tukey multiple comparisons of means
95% family-wise confidence level
Fit: aov(formula = Intensity ~ RU * Rapamycin, data = ANOVA_test)
$RU
diff lwr upr p adj
RU-Control -0.2690873 -0.4625757 -0.07559894 0.0104645
$Rapamycin
diff lwr upr p adj
Rapamycin-Control -0.2542946 -0.447783 -0.06080625 0.01426
$`RU:Rapamycin`
diff lwr upr p adj
RU:Control-Control:Control -0.46275892 -0.8356188 -0.08989905 0.0143204
Control:Rapamycin-Control:Control -0.44796623 -0.8208261 -0.07510636 0.0176029
RU:Rapamycin-Control:Control -0.52338190 -0.8962418 -0.15052203 0.0061829
Control:Rapamycin-RU:Control 0.01479269 -0.3580672 0.38765256 0.9993813
RU:Rapamycin-RU:Control -0.06062298 -0.4334829 0.31223689 0.9614866
RU:Rapamycin-Control:Rapamycin -0.07541568 -0.4482755 0.29744419 0.9299485
Atg8a II/ total proteins
Control	RU	Ra	Ra+RU
1.15898	0.63954	0.674017	0.258041
0.997269	0.647366	0.517857	0.52485
1.00781	0.563677	0.465662	0.579517
0.835937	0.74086	0.478872	0.38344
Df Sum Sq Mean Sq F value Pr(>F)
RU 1 0.2023 0.2023 15.310 0.00206 **
Rapamycin 1 0.4587 0.4587 34.717 7.34e-05 ***
RU:Rapamycin 1 0.0648 0.0648 4.902 0.04694 *
Residuals 12 0.1586 0.0132
---
Signif. codes: 0 ‘***’ 0.001 ‘**’ 0.01 ‘*’ 0.05 ‘.’ 0.1 ‘ ’ 1
Tukey multiple comparisons of means
95% family-wise confidence level
Fit: aov(formula = Intensity ~ RU * Rapamycin, data = ANOVA_test)
$RU
diff lwr upr p adj
RU-Control -0.2248896 -0.3501171 -0.09966223 0.0020617
$Rapamycin
diff lwr upr p adj
Rapamycin-Control -0.3386483 -0.4638757 -0.2134209 7.34e-05
$`RU:Rapamycin`
diff lwr upr p adj
RU:Control-Control:Control -0.35213936 -0.5934577 -0.11082107 0.0046575
Control:Rapamycin-Control:Control -0.46589800 -0.7072163 -0.22457971 0.0004728
RU:Rapamycin-Control:Control -0.56353794 -0.8048562 -0.32221965 0.0000807
Control:Rapamycin-RU:Control -0.11375864 -0.3550769 0.12755965 0.5228834
RU:Rapamycin-RU:Control -0.21139858 -0.4527169 0.02991972 0.0934785
RU:Rapamycin-Control:Rapamycin -0.09763994 -0.3389582 0.14367836 0.6376112
Atg8a II/ Atg8a I
Control	RU	Ra	Ra+RU
1.21565	0.93044	1.08328	1.02833
1.06558	0.889991	0.81563	0.718391
0.7855	0.79306	0.544224	0.526968
0.933273	0.753429	0.591651	0.652472
Df Sum Sq Mean Sq F value Pr(>F)
RU 1 0.0344 0.03438 0.937 0.3522
Rapamycin 1 0.1235 0.12355 3.366 0.0915 .
RU:Rapamycin 1 0.0172 0.01719 0.468 0.5068
Residuals 12 0.4405 0.03671
---
Signif. codes: 0 ‘***’ 0.001 ‘**’ 0.01 ‘*’ 0.05 ‘.’ 0.1 ‘ ’ 1
Tukey multiple comparisons of means
95% family-wise confidence level
Fit: aov(formula = Intensity ~ RU * Rapamycin, data = ANOVA_test)
$RU
diff lwr upr p adj
RU-Control -0.09271272 -0.3014334 0.116008 0.3522371
$Rapamycin
diff lwr upr p adj
Rapamycin-Control -0.1757473 -0.384468 0.03297341 0.0914632
$`RU:Rapamycin`
diff lwr upr p adj
RU:Control-Control:Control -0.15827027 -0.5604835 0.2439429 0.6568253
Control:Rapamycin-Control:Control -0.24130483 -0.6435180 0.1609084 0.3280846
RU:Rapamycin-Control:Control -0.26846001 -0.6706732 0.1337532 0.2477034
Control:Rapamycin-RU:Control -0.08303456 -0.4852478 0.3191786 0.9260054
RU:Rapamycin-RU:Control -0.11018974 -0.5124029 0.2920235 0.8470302
RU:Rapamycin-Control:Rapamycin -0.02715517 -0.4293684 0.3750580 0.9969880

## Sheet: D
Figure 5D
Lysotracker
Control	RU	Rapa	Rapa+RU
22	290.33	207.33	60
149	318	706	18.33
97.33	77.33	231.67	146.67
1.33	156.67	377.33	143.33
31	279.33	204.67	393
1.67	162.67	145.67	331.67
19.33	594	487.33	510
Data: Lmer_test
Models:
number.RU: number ~ RU + (1 | subject)
number.model: number ~ RU + Rapamycin + (1 | subject)
Df AIC BIC logLik deviance Chisq Chi Df Pr(>Chisq)
number.RU 4 1170.7 1180.4 -581.36 1162.7
number.model 5 1167.5 1179.7 -578.76 1157.5 5.2091 1 0.02247 *
---
Signif. codes: 0 ‘***’ 0.001 ‘**’ 0.01 ‘*’ 0.05 ‘.’ 0.1 ‘ ’ 1
Data: Lmer_test
Models:
number.Rapamycin: number ~ Rapamycin + (1 | subject)
number.model: number ~ RU + Rapamycin + (1 | subject)
Df AIC BIC logLik deviance Chisq Chi Df Pr(>Chisq)
number.Rapamycin 4 1167.1 1176.8 -579.53 1159.1
number.model 5 1167.5 1179.7 -578.76 1157.5 1.5593 1 0.2118
Data: Lmer_test
Models:
number.model: number ~ RU + Rapamycin + (1 | subject)
number.interaction: number ~ RU * Rapamycin + (1 | subject)
Df AIC BIC logLik deviance Chisq Chi Df Pr(>Chisq)
number.model 5 1167.5 1179.7 -578.76 1157.5
number.interaction 6 1162.1 1176.7 -575.03 1150.1 7.4475 1 0.006353 **
---
Signif. codes: 0 ‘***’ 0.001 ‘**’ 0.01 ‘*’ 0.05 ‘.’ 0.1 ‘ ’ 1
$lsmeans
RU Rapamycin lsmean SE df lower.CL upper.CL
Control Control 34.8 57.8 32.7 -82.8 152
RU Control 268.3 57.8 32.7 150.8 386
Control Rapamycin 337.1 57.8 32.7 219.6 455
RU Rapamycin 258.3 57.8 32.7 140.7 376
Degrees-of-freedom method: kenward-roger
Confidence level used: 0.95
$contrasts
contrast estimate SE df t.ratio p.value
Control,Control - RU,Control -233.6 81.7 32.7 -2.859 0.0352
Control,Control - Control,Rapamycin -302.4 81.7 32.7 -3.701 0.0042
Control,Control - RU,Rapamycin -223.5 81.7 32.7 -2.736 0.0467
RU,Control - Control,Rapamycin -68.8 81.7 32.7 -0.842 0.8339
RU,Control - RU,Rapamycin 10.0 81.7 32.7 0.123 0.9993
Control,Rapamycin - RU,Rapamycin 78.9 81.7 32.7 0.965 0.7699
P value adjustment: tukey method for comparing a family of 4 estimates
Cyto-ID
Control	RU	Rapa	Rapa+RU
315.33	131.33	212.67	36.33
768	102.33	145	55.67
78.67	15.33	100	2
167	83.67	104	41.33
8.33	177.33	96.67	447.67
5.33	103.33	25.33	269.33
98	403.67	413	156
Data: Lmer_test
Models:
number.RU: number ~ RU + (1 | subject)
number.model: number ~ RU + Rapamycin + (1 | subject)
Df AIC BIC logLik deviance Chisq Chi Df Pr(>Chisq)
number.RU 4 1094.9 1104.6 -543.44 1086.9
number.model 5 1096.4 1108.5 -543.20 1086.4 0.492 1 0.4831
Data: Lmer_test
Models:
number.Rapamycin: number ~ Rapamycin + (1 | subject)
number.model: number ~ RU + Rapamycin + (1 | subject)
Df AIC BIC logLik deviance Chisq Chi Df Pr(>Chisq)
number.Rapamycin 4 1094.6 1104.3 -543.29 1086.6
number.model 5 1096.4 1108.5 -543.20 1086.4 0.1799 1 0.6715
Data: Lmer_test
Models:
number.model: number ~ RU + Rapamycin + (1 | subject)
number.interaction: number ~ RU * Rapamycin + (1 | subject)
Df AIC BIC logLik deviance Chisq Chi Df Pr(>Chisq)
number.model 5 1096.4 1108.5 -543.20 1086.4
number.interaction 6 1094.6 1109.2 -541.29 1082.6 3.8098 1 0.05095 .
---
Signif. codes: 0 ‘***’ 0.001 ‘**’ 0.01 ‘*’ 0.05 ‘.’ 0.1 ‘ ’ 1
$lsmeans
RU Rapamycin lsmean SE df lower.CL upper.CL
Control Control 210.4 60.1 32.7 88.0 333
RU Control 72.6 60.1 32.7 -49.8 195
Control Rapamycin 56.0 60.1 32.7 -66.4 178
RU Rapamycin 143.1 60.1 32.7 20.7 265
Degrees-of-freedom method: kenward-roger
Confidence level used: 0.95
$contrasts
contrast estimate SE df t.ratio p.value
Control,Control - RU,Control 137.8 85 32.7 1.620 0.3817
Control,Control - Control,Rapamycin 154.4 85 32.7 1.816 0.2842
Control,Control - RU,Rapamycin 67.3 85 32.7 0.791 0.8579
RU,Control - Control,Rapamycin 16.7 85 32.7 0.196 0.9973
RU,Control - RU,Rapamycin -70.5 85 32.7 -0.829 0.8404
Control,Rapamycin - RU,Rapamycin -87.1 85 32.7 -1.025 0.7362
P value adjustment: tukey method for comparing a family of 4 estimates

## Sheet: E
Figure 5E
Control	RU	Rapa	Rapa+RU
10.98	20.23	21.38	27
17.7	26.57	30	27
21.03	30.85	24.75	26.3
17.63	27.56	24.87	22.23
15.55	23.98	22.14	21.58
19.13	25.83	18.56	23.2
12.98	28.1	19.52	23.98
19.88	24.24	26.33	20
19.85	25.63	21.83	22.42
	17.2	22.7	19.23
Data: Lmer_test
Models:
ratio.RU: ratio ~ RU + (1 | subject)
ratio.model: ratio ~ RU + Rapamycin + (1 | subject)
Df AIC BIC logLik deviance Chisq Chi Df Pr(>Chisq)
ratio.RU 4 1086.2 1098.3 -539.08 1078.2
ratio.model 5 1086.0 1101.2 -538.02 1076.0 2.1318 1 0.1443
Data: Lmer_test
Models:
ratio.Rapamycin: ratio ~ Rapamycin + (1 | subject)
ratio.model: ratio ~ RU + Rapamycin + (1 | subject)
Df AIC BIC logLik deviance Chisq Chi Df Pr(>Chisq)
ratio.Rapamycin 4 1093.3 1105.4 -542.63 1085.3
ratio.model 5 1086.0 1101.2 -538.02 1076.0 9.23 1 0.002381 **
---
Signif. codes: 0 ‘***’ 0.001 ‘**’ 0.01 ‘*’ 0.05 ‘.’ 0.1 ‘ ’ 1
Data: Lmer_test
Models:
ratio.model: ratio ~ RU + Rapamycin + (1 | subject)
ratio.interaction: ratio ~ RU * Rapamycin + (1 | subject)
Df AIC BIC logLik deviance Chisq Chi Df Pr(>Chisq)
ratio.model 5 1086.0 1101.2 -538.02 1076.0
ratio.interaction 6 1077.2 1095.5 -532.62 1065.2 10.791 1 0.00102 **
---
Signif. codes: 0 ‘***’ 0.001 ‘**’ 0.01 ‘*’ 0.05 ‘.’ 0.1 ‘ ’ 1
$lsmeans
RU Rapamycin lsmean SE df lower.CL upper.CL
Control Control 16.8 1.34 37.9 14.1 19.5
RU Control 25.3 1.27 37.8 22.8 27.9
Control Rapamycin 22.9 1.19 30.4 20.5 25.3
RU Rapamycin 23.1 1.25 37.3 20.6 25.6
Degrees-of-freedom method: kenward-roger
Confidence level used: 0.95
$contrasts
contrast estimate SE df t.ratio p.value
Control,Control - RU,Control -8.50 1.84 37.8 -4.614 0.0003
Control,Control - Control,Rapamycin -6.07 1.79 34.3 -3.390 0.0092
Control,Control - RU,Rapamycin -6.26 1.83 37.6 -3.420 0.0079
RU,Control - Control,Rapamycin 2.43 1.74 34.0 1.399 0.5084
RU,Control - RU,Rapamycin 2.24 1.78 37.5 1.260 0.5934
Control,Rapamycin - RU,Rapamycin -0.19 1.73 33.8 -0.110 0.9995
P value adjustment: tukey method for comparing a family of 4 estimates

## Sheet: F
Figure 5F
Control	RU	Rapamycin	Rapamycin+RU
0	3.33333	0	0
0	3.84615	0	0
7.40741	3.7037	0	0
7.40741	4	0	0
7.14286	3.7037	0	0
0	3.125	0	0
7.69231	0	0	0
11.1111	0	0	0
7.14286	0	0	0
15	0	0	0
Df Sum Sq Mean Sq F value Pr(>F)
RU 1 42.42 42.42 5.973 0.0196 *
Rapamycin 1 179.00 179.00 25.203 1.41e-05 ***
RU:Rapamycin 1 42.42 42.42 5.973 0.0196 *
Residuals 36 255.68 7.10
---
Signif. codes: 0 ‘***’ 0.001 ‘**’ 0.01 ‘*’ 0.05 ‘.’ 0.1 ‘ ’ 1
Tukey multiple comparisons of means
95% family-wise confidence level
Fit: aov(formula = number ~ RU * Rapamycin, data = ANOVA_test)
$RU
diff lwr upr p adj
RU-Control -2.059603 -3.768778 -0.3504269 0.0195596
$Rapamycin
diff lwr upr p adj
Rapamycin-Control -4.230792 -5.939968 -2.521616 1.41e-05
$`RU:Rapamycin`
diff lwr upr p adj
RU:Control-Control:Control -4.119205e+00 -7.329069 -0.9093414 0.0074289
Control:Rapamycin-Control:Control -6.290395e+00 -9.500258 -3.0805309 0.0000368
RU:Rapamycin-Control:Control -6.290395e+00 -9.500258 -3.0805309 0.0000368
Control:Rapamycin-RU:Control -2.171190e+00 -5.381053 1.0386742 0.2800287
RU:Rapamycin-RU:Control -2.171190e+00 -5.381053 1.0386742 0.2800287
RU:Rapamycin-Control:Rapamycin 1.554312e-15 -3.209864 3.2098637 1.0000000
