# Supplementary material for: A TORC1-histone axis regulates chromatin organisation and non-canonical induction of autophagy to ameliorate ageing
Source: eLife. 2021 May 14;10:e62233. doi: 10.7554/eLife.62233 (PMC8186904; doi:10.7554/eLife.62233)
Supplement: Figure 6—figure supplement 1—source data 1. [file elife-62233-fig6-figsupp1-data1.xlsx]

## Sheet: A
Figure 6-Figure supplement 1A
his34OE Control	his34OE RU	his34OE;atg1i Control	his34OE;atg1i RU
52	108.33	8	10
8.33	222.67	127	22.33
12	345	9.33	111.67
25.67	55	61	20.33
35.33	140	15	49.33
36.33	332.67	27.67	5.67
1.5	398	10.67	7.5
Data: Lmer_test
Models:
number.RU: number ~ RU + (1 | subject)
number.model: number ~ RU + Atg1i + (1 | subject)
Df AIC BIC logLik deviance Chisq Chi Df Pr(>Chisq)
number.RU 4 1039.8 1049.5 -515.91 1031.8
number.model 5 1034.2 1046.3 -512.09 1024.2 7.6359 1 0.005722 **
---
Signif. codes: 0 ‘***’ 0.001 ‘**’ 0.01 ‘*’ 0.05 ‘.’ 0.1 ‘ ’ 1
Data: Lmer_test
Models:
number.Atg1i: number ~ Atg1i + (1 | subject)
number.model: number ~ RU + Atg1i + (1 | subject)
Df AIC BIC logLik deviance Chisq Chi Df Pr(>Chisq)
number.Atg1i 4 1043.7 1053.4 -517.86 1035.7
number.model 5 1034.2 1046.3 -512.09 1024.2 11.524 1 0.0006869 ***
---
Signif. codes: 0 ‘***’ 0.001 ‘**’ 0.01 ‘*’ 0.05 ‘.’ 0.1 ‘ ’ 1
Data: Lmer_test
Models:
number.model: number ~ RU + Atg1i + (1 | subject)
number.interaction: number ~ RU * Atg1i + (1 | subject)
Df AIC BIC logLik deviance Chisq Chi Df Pr(>Chisq)
number.model 5 1034.2 1046.3 -512.09 1024.2
number.interaction 6 1025.4 1040.0 -506.69 1013.4 10.808 1 0.001011 **
---
Signif. codes: 0 ‘***’ 0.001 ‘**’ 0.01 ‘*’ 0.05 ‘.’ 0.1 ‘ ’ 1
$lsmeans
RU Atg1i lsmean SE df lower.CL upper.CL
Control atg1i 8.38 25.6 32.7 -43.6 60.4
RU atg1i 30.81 25.6 32.7 -21.2 82.8
Control Control 7.48 25.6 32.7 -44.5 59.5
RU Control 201.76 25.6 32.7 149.7 253.8
Degrees-of-freedom method: kenward-roger
Confidence level used: 0.95
$contrasts
contrast estimate SE df t.ratio p.value
Control,atg1i - RU,atg1i -22.429 36.1 32.7 -0.621 0.9247
Control,atg1i - Control,Control 0.905 36.1 32.7 0.025 1.0000
Control,atg1i - RU,Control -193.381 36.1 32.7 -5.351 <.0001
RU,atg1i - Control,Control 23.333 36.1 32.7 0.646 0.9163
RU,atg1i - RU,Control -170.952 36.1 32.7 -4.730 0.0002
Control,Control - RU,Control -194.286 36.1 32.7 -5.376 <.0001
P value adjustment: tukey method for comparing a family of 4 estimates

## Sheet: B
Figure 6-Figure supplement 1B
his34OE Control	his34OE RU	his34OE;atg1i Control	his34OE;atg1i RU
23.7	0	24.6	39.1
22.3	7.8	40.9	10.3
45.4	16.3	39.3	45.8
10.3	7	28.7	61.9
57.7	15.3	64.5	71.9
38.8	4.8	38.6	43.3
25.9	15.9	59	40.2
Df Sum Sq Mean Sq F value Pr(>F)
Atg1i 1 3586 3586 16.047 0.000519 ***
RU 1 700 700 3.134 0.089384 .
Atg1i:RU 1 1080 1080 4.831 0.037833 *
Residuals 24 5363 223
---
Signif. codes: 0 ‘***’ 0.001 ‘**’ 0.01 ‘*’ 0.05 ‘.’ 0.1 ‘ ’ 1
12 observations deleted due to missingness
Tukey multiple comparisons of means
95% family-wise confidence level
Fit: aov(formula = ratio ~ Atg1i * RU, data = ANOVA_test_OE)
$Atg1i
diff lwr upr p adj
Control-Atg1i -22.63351 -34.29486 -10.97215 0.0005192
$RU
diff lwr upr p adj
RU-Control -10.00238 -21.66373 1.65898 0.089384
$`Atg1i:RU`
diff lwr upr p adj
Control:Control-Atg1i:Control -10.214260 -32.257015 11.8284946 0.5850229
Atg1i:RU-Atg1i:Control 2.416869 -19.625886 24.4596239 0.9901399
Control:RU-Atg1i:Control -32.635882 -54.678637 -10.5931272 0.0022508
Atg1i:RU-Control:Control 12.631129 -9.411625 34.6738839 0.4079228
Control:RU-Control:Control -22.421622 -44.464377 -0.3788671 0.0451688
Control:RU-Atg1i:RU -35.052751 -57.095506 -13.0099964 0.0010623
