# Supplementary material for: A TORC1-histone axis regulates chromatin organisation and non-canonical induction of autophagy to ameliorate ageing
Source: eLife. 2021 May 14;10:e62233. doi: 10.7554/eLife.62233 (PMC8186904; doi:10.7554/eLife.62233)
Supplement: Figure 6—source data 1. [file elife-62233-fig6-data1.xlsx]

## Sheet: A
Figure 6A
his34OE Control	his34OE RU	his34OE;atg5i Control	his34OE;atg5i RU
52	108.33	8	10
8.33	222.67	127	22.33
12	345	9.33	111.67
25.67	55	61	20.33
35.33	140	15	49.33
36.33	332.67	27.67	5.67
1.5	398	10.67	7.5
Data: Lmer_test
Models:
number.RU: number ~ RU + (1 | subject)
number.model: number ~ RU + Atg5i + (1 | subject)
Df AIC BIC logLik deviance Chisq Chi Df Pr(>Chisq)
number.RU 4 1036.2 1045.7 -514.07 1028.2
number.model 5 1031.0 1043.0 -510.49 1021.0 7.1595 1 0.007457 **
---
Signif. codes: 0 ‘***’ 0.001 ‘**’ 0.01 ‘*’ 0.05 ‘.’ 0.1 ‘ ’ 1
Data: Lmer_test
Models:
number.Atg5i: number ~ Atg5i + (1 | subject)
number.model: number ~ RU + Atg5i + (1 | subject)
Df AIC BIC logLik deviance Chisq Chi Df Pr(>Chisq)
number.Atg5i 4 1037.3 1046.9 -514.67 1029.3
number.model 5 1031.0 1043.0 -510.49 1021.0 8.3519 1 0.003853 **
---
Signif. codes: 0 ‘***’ 0.001 ‘**’ 0.01 ‘*’ 0.05 ‘.’ 0.1 ‘ ’ 1
Data: Lmer_test
Models:
number.model: number ~ RU + Atg5i + (1 | subject)
number.interaction: number ~ RU * Atg5i + (1 | subject)
Df AIC BIC logLik deviance Chisq Chi Df Pr(>Chisq)
number.model 5 1031.0 1043.0 -510.49 1021.0
number.interaction 6 1020.9 1035.2 -504.44 1008.9 12.101 1 0.000504 ***
---
Signif. codes: 0 ‘***’ 0.001 ‘**’ 0.01 ‘*’ 0.05 ‘.’ 0.1 ‘ ’ 1
$lsmeans
RU Atg5i lsmean SE df lower.CL upper.CL
Control atg5i 37.0 27.4 24.9 -19.6 93.5
RU atg5i 33.6 28.1 26.6 -24.1 91.4
Control Control 25.6 28.1 26.6 -32.2 83.4
RU Control 220.3 28.1 26.6 162.6 278.1
Degrees-of-freedom method: kenward-roger
Confidence level used: 0.95
$contrasts
contrast estimate SE df t.ratio p.value
Control,atg5i - RU,atg5i 3.30 39.3 25.7 0.084 0.9998
Control,atg5i - Control,Control 11.35 39.3 25.7 0.289 0.9914
Control,atg5i - RU,Control -183.40 39.3 25.7 -4.666 0.0005
RU,atg5i - Control,Control 8.05 39.8 26.6 0.202 0.9970
RU,atg5i - RU,Control -186.70 39.8 26.6 -4.690 0.0004
Control,Control - RU,Control -194.75 39.8 26.6 -4.892 0.0002
P value adjustment: tukey method for comparing a family of 4 estimates

## Sheet: B
Figure 6B
day	5966GSxHis3/4 Control	5966GSxHis3/4 RU	5966GSxHis3/4;Atg5i Control	5966GSxHis3/4;Atg5i RU
2	1	1	1	1
5	1	1	1	1
7	1	0.994845	1	1
9	1	0.989691	1	0.995
12	1	0.989691	1	0.995
14	1	0.984454	1	0.995
16	1	0.984454	0.994737	0.984898
19	1	0.984454	0.989446	0.979822
21	1	0.984454	0.989446	0.979822
23	0.994898	0.984454	0.989446	0.969668
26	0.989796	0.984454	0.984126	0.964565
28	0.984694	0.984454	0.984126	0.959461
30	0.984694	0.984454	0.984126	0.959461
33	0.964286	0.984454	0.973429	0.959461
35	0.959184	0.984454	0.962732	0.95433
37	0.959184	0.984454	0.957354	0.95433
39	0.959184	0.984454	0.951975	0.949199
42	0.938776	0.979104	0.946597	0.938938
44	0.938776	0.979104	0.930462	0.938938
47	0.928571	0.957703	0.908948	0.918415
49	0.913181	0.952352	0.90357	0.892761
51	0.897703	0.930951	0.849786	0.836322
54	0.825474	0.89885	0.817515	0.769621
56	0.763564	0.882799	0.758353	0.738836
58	0.681016	0.829296	0.677677	0.620828
60	0.598469	0.786493	0.580866	0.548996
62	0.484966	0.700889	0.473298	0.405334
64	0.381782	0.571494	0.317325	0.302718
66	0.304394	0.439611	0.242028	0.194971
68	0.206369	0.274757	0.123703	0.12827
70	0.0825474	0.159359	0.026892	0.0564389
72	0.0515921	0.115398	0.0107568	0.0410465
75	0.00515921	0.0439611	0	0.0205232
77	0.00515921	0.0164854	0	0.0205232
79	0	0.0109903	0	0.00513081
82	0	0	0	0

## Sheet: C
Figure 6C
5966GSxHis3/4 Control	5966GSxHis3/4 RU	5966GSxHis3/4;Atg5i Control	5966GSxHis3/4;Atg5i RU
10.3	9.6	15.3	6.8
24.2	1.9	28.6	27.2
14.9	16.9	24	23.3
15.5	7.4	14.4	17.9
6.4	2.3	8.3	19.9
10.1	16.4	7.9	38.3
8.8	4.5	17.5	19.5
16.2	0	29.8	36.8
31	0	12.6	26.9
29.1	11.4	7.4
	0
Df Sum Sq Mean Sq F value Pr(>F)
RU 1 51.1 51.1 0.745 0.39376
Atg5i 1 764.4 764.4 11.156 0.00196 **
RU:Atg5i 1 781.8 781.8 11.409 0.00177 **
Residuals 36 2466.8 68.5
---
Signif. codes: 0 '***' 0.001 '**' 0.01 '*' 0.05 '.' 0.1 ' ' 1
Tukey multiple comparisons of means
95% family-wise confidence level
Fit: aov(formula = ratio ~ RU * Atg5i, data = ANOVA_test_OE)
$RU
diff lwr upr p adj
RU-Control -2.259489 -7.5684 3.049422 0.3937621
$Atg5i
diff lwr upr p adj
Control-Atg5i -8.743004 -14.05856 -3.427445 0.0019827
$`RU:Atg5i`
diff lwr upr p adj
RU:Atg5i-Control:Atg5i 7.4884387 -2.755003 17.7318807 0.2185789
Control:Control-Control:Atg5i 0.0547244 -9.915510 10.0249587 0.9999988
RU:Control-Control:Atg5i -10.1853169 -19.926320 -0.4443140 0.0375562
Control:Control-RU:Atg5i -7.4337143 -17.677156 2.8097277 0.2241309
RU:Control-RU:Atg5i -17.6737556 -27.694218 -7.6532931 0.0001820
RU:Control-Control:Control -10.2400413 -19.981044 -0.4990384 0.0362330

## Sheet: D
Figure 6D
5966GSxHis3/4 Control	5966GSxHis3/4 RU	5966GSxHis3/4;Atg5i Control	5966GSxHis3/4;Atg5i RU
6.3	12.5	11.8	6.7
6.3	6.7	11.8	20
6.7	0	11.8	5.6
13.3	0	5.9	12.5
20	0	5.6	12.5
16.7	0	12.5	17.6
11.8	0	14.3	11.1
0	5.6	5.9	6.3
12.5	5.6	5.9	5.9
11.1	5.9	11.8	11.8
5.9	0	6.3	12.5
12.5	0	16.7	13.3
Df Sum Sq Mean Sq F value Pr(>F)
RU 1 105.9 105.91 5.100 0.02894 *
Genotype 1 194.8 194.81 9.381 0.00373 **
RU:Genotype 1 218.0 218.03 10.499 0.00228 **
Residuals 44 913.7 20.77
---
Signif. codes: 0 ‘***’ 0.001 ‘**’ 0.01 ‘*’ 0.05 ‘.’ 0.1 ‘ ’ 1
Tukey multiple comparisons of means
95% family-wise confidence level
Fit: aov(formula = number ~ RU * Genotype, data = ANOVA_test)
$RU
diff lwr upr p adj
RU-Control -2.970833 -5.622057 -0.3196092 0.0289353
$Genotype
diff lwr upr p adj
Control-atg5i -4.029167 -6.680391 -1.377943 0.0037335
$`RU:Genotype`
diff lwr upr p adj
RU:atg5i-Control:atg5i 1.2916667 -3.675622 6.258955 0.8987264
Control:Control-Control:atg5i 0.2333333 -4.733955 5.200622 0.9992839
RU:Control-Control:atg5i -7.0000000 -11.967288 -2.032712 0.0026866
Control:Control-RU:atg5i -1.0583333 -6.025622 3.908955 0.9408017
RU:Control-RU:atg5i -8.2916667 -13.258955 -3.324378 0.0003205
RU:Control-Control:Control -7.2333333 -12.200622 -2.266045 0.0018518
