# Supplementary material for: A TORC1-histone axis regulates chromatin organisation and non-canonical induction of autophagy to ameliorate ageing
Source: eLife. 2021 May 14;10:e62233. doi: 10.7554/eLife.62233 (PMC8186904; doi:10.7554/eLife.62233)
Supplement: Figure 7—figure supplement 1—source data 1. [file elife-62233-fig7-figsupp1-data1.xlsx]

## Sheet: A
Figure 7-Figure supplement 1A
Control	RU	Rapa	Rapa+RU
103	152.67	677	81.33
17.33	34.67	361.67	40.33
42.67	39.33	547	29.33
127	3	263.33	69.33
154.67	179.33	661	187
68	506	442.33	115.33
135	227.33	427.33	17
135.33	274.67	244	61.67
Data: Lmer_test
Models:
number.RU: number ~ RU + (1 | subject)
number.model: number ~ RU + Rapamycin + (1 | subject)
Df AIC BIC logLik deviance Chisq Chi Df Pr(>Chisq)
number.RU 4 1274.2 1284.5 -633.12 1266.2
number.model 5 1271.7 1284.5 -630.85 1261.7 4.5555 1 0.03281 *
---
Signif. codes: 0 ‘***’ 0.001 ‘**’ 0.01 ‘*’ 0.05 ‘.’ 0.1 ‘ ’ 1
Data: Lmer_test
Models:
number.Rapamycin: number ~ Rapamycin + (1 | subject)
number.model: number ~ RU + Rapamycin + (1 | subject)
Df AIC BIC logLik deviance Chisq Chi Df Pr(>Chisq)
number.Rapamycin 4 1275.9 1286.1 -633.93 1267.9
number.model 5 1271.7 1284.5 -630.85 1261.7 6.1742 1 0.01296 *
---
Signif. codes: 0 ‘***’ 0.001 ‘**’ 0.01 ‘*’ 0.05 ‘.’ 0.1 ‘ ’ 1
Data: Lmer_test
Models:
number.model: number ~ RU + Rapamycin + (1 | subject)
number.interaction: number ~ RU * Rapamycin + (1 | subject)
Df AIC BIC logLik deviance Chisq Chi Df Pr(>Chisq)
number.model 5 1271.7 1284.5 -630.85 1261.7
number.interaction 6 1251.6 1267.0 -619.80 1239.6 22.102 1 2.585e-06 ***
---
Signif. codes: 0 ‘***’ 0.001 ‘**’ 0.01 ‘*’ 0.05 ‘.’ 0.1 ‘ ’ 1
$lsmeans
RU Rapamycin lsmean SE df lower.CL upper.CL
Control Control 97.9 43.3 36.6 10.1 186
RU Control 177.1 43.3 36.6 89.4 265
Control Rapamycin 453.0 43.3 36.6 365.2 541
RU Rapamycin 75.2 43.3 36.6 -12.6 163
Degrees-of-freedom method: kenward-roger
Confidence level used: 0.95
$contrasts
contrast estimate SE df t.ratio p.value
Control,Control - RU,Control -79.2 61.2 36.6 -1.294 0.5723
Control,Control - Control,Rapamycin -355.1 61.2 36.6 -5.800 <.0001
Control,Control - RU,Rapamycin 22.7 61.2 36.6 0.371 0.9823
RU,Control - Control,Rapamycin -275.8 61.2 36.6 -4.505 0.0004
RU,Control - RU,Rapamycin 102.0 61.2 36.6 1.665 0.3562
Control,Rapamycin - RU,Rapamycin 377.8 61.2 36.6 6.171 <.0001
P value adjustment: tukey method for comparing a family of 4 estimates

## Sheet: B
Figure 7-Figure supplement 1B
day	5966GS>Bchsi Control	5966GS>Bchsi Rapa	5966GS>Bchsi RU	5966GS>Bchsi Rapa+RU
0	1	1	1	1
3	1	1	1	1
5	1	1	0.988571	0.988889
8	1	0.994286	0.988571	0.983238
10	0.981595	0.988367	0.988571	0.97742
12	0.975343	0.988367	0.988571	0.97742
14	0.962839	0.988367	0.982469	0.971424
16	0.962839	0.982266	0.982469	0.971424
19	0.956504	0.982266	0.976211	0.971424
22	0.956504	0.982266	0.976211	0.971424
24	0.949997	0.982266	0.957438	0.959281
26	0.949997	0.969911	0.95118	0.959281
29	0.94349	0.969911	0.95118	0.959281
31	0.94349	0.963733	0.95118	0.953209
33	0.936984	0.963733	0.95118	0.947138
36	0.936984	0.963733	0.944923	0.947138
38	0.936984	0.963733	0.944923	0.941028
40	0.930431	0.963733	0.944923	0.941028
43	0.910774	0.963733	0.932407	0.922455
45	0.910774	0.963733	0.932407	0.903882
47	0.910774	0.963733	0.932407	0.897691
50	0.87729	0.963733	0.888603	0.866736
52	0.857199	0.937686	0.838541	0.823399
54	0.830412	0.931174	0.819767	0.804826
57	0.756746	0.898616	0.750932	0.76768
59	0.716565	0.853034	0.713385	0.674816
61	0.616112	0.807452	0.632034	0.563378
64	0.455387	0.677218	0.463075	0.390031
66	0.314753	0.58829	0.287857	0.25383
68	0.207603	0.421245	0.219022	0.19192
71	0.0870593	0.174308	0.081351	0.0681007
73	0.0468781	0.137994	0.0563199	0.0433368
76	0.0133937	0.0581027	0.00625777	0.00619097
78	0.00669687	0.0290514	0	0
80	0	0.0145257	0	0
82	0	0.00726284	0	0

## Sheet: C
Figure 7-Figure supplement 1C
Control	RU	Rapa	Rapa+RU
29.8	44.5	0	29.7
38	15.7	9.6	17.2
12.9	13.6	1.2	13.7
22.2	30.2	4	26.4
21.1	32.8	5.2	6
15.8	7.4	5.3	26.9
13	26.1	5.9	35.4
Df Sum Sq Mean Sq F value Pr(>F)
Rapamycin 1 666.0 666.0 7.245 0.0127 *
RU 1 716.0 716.0 7.790 0.0101 *
Rapamycin:RU 1 407.1 407.1 4.429 0.0460 *
Residuals 24 2206.0 91.9
---
Signif. codes: 0 ‘***’ 0.001 ‘**’ 0.01 ‘*’ 0.05 ‘.’ 0.1 ‘ ’ 1
Tukey multiple comparisons of means
95% family-wise confidence level
Fit: aov(formula = ratio ~ Rapamycin * RU, data = ANOVA_test_OE)
$Rapamycin
diff lwr upr p adj
Rapamycin-Control -9.753885 -17.23278 -2.274987 0.0127465
$RU
diff lwr upr p adj
RU-Control 10.11366 2.634765 17.59256 0.0101389
$`Rapamycin:RU`
diff lwr upr p adj
Rapamycin:Control-Control:Control -17.3802490 -31.517157 -3.243341 0.0120248
Control:RU-Control:Control 2.4872997 -11.649608 16.624208 0.9616127
Rapamycin:RU-Control:Control 0.3597786 -13.777129 14.496686 0.9998721
Control:RU-Rapamycin:Control 19.8675486 5.730641 34.004456 0.0037479
Rapamycin:RU-Rapamycin:Control 17.7400276 3.603120 31.876935 0.0101896
Rapamycin:RU-Control:RU -2.1275210 -16.264429 12.009387 0.9753448

## Sheet: D
Figure 7-Figure supplement 1D
Control	RU	Rapa	Rapa+RU
0	14.29	0	12.5
23.08	7.14	0	0
12.5	16.67	9.09	9.09
18.18	21.43	0	20
27.27	14.29	0	0
16.67	18.18	0	9.09
18.18	9.09	0	7.69
27.27	14.29	7.69	11.76
6.25	0	0	13.33
0	9.09	0	36.36
Df Sum Sq Mean Sq F value Pr(>F)
Rapamycin 1 470.9 470.9 7.164 0.0111 *
RU 1 152.5 152.5 2.321 0.1364
Rapamycin:RU 1 409.6 409.6 6.231 0.0173 *
Residuals 36 2366.2 65.7
---
Signif. codes: 0 ‘***’ 0.001 ‘**’ 0.01 ‘*’ 0.05 ‘.’ 0.1 ‘ ’ 1
Tukey multiple comparisons of means
95% family-wise confidence level
Fit: aov(formula = number ~ Rapamycin * RU, data = ANOVA_test)
$Rapamycin
diff lwr upr p adj
Rapamycin-Control -6.862127 -12.06161 -1.662648 0.011126
$RU
diff lwr upr p adj
RU-Control 3.905439 -1.29404 9.104918 0.1364096
$`Rapamycin:RU`
diff lwr upr p adj
Rapamycin:Control-Control:Control -13.2619464 -23.0266642 -3.497229 0.0042979
Control:RU-Control:Control -2.4943806 -12.2590984 7.270337 0.9010088
Rapamycin:RU-Control:Control -2.9566879 -12.7214057 6.808030 0.8467490
Control:RU-Rapamycin:Control 10.7675658 1.0028479 20.532284 0.0259285
Rapamycin:RU-Rapamycin:Control 10.3052585 0.5405406 20.069976 0.0352881
Rapamycin:RU-Control:RU -0.4623073 -10.2270251 9.302411 0.9992450
