# Supplementary material for: A TORC1-histone axis regulates chromatin organisation and non-canonical induction of autophagy to ameliorate ageing
Source: eLife. 2021 May 14;10:e62233. doi: 10.7554/eLife.62233 (PMC8186904; doi:10.7554/eLife.62233)
Supplement: Figure 7—source data 1. [file elife-62233-fig7-data1.xlsx]

## Sheet: A
Figure 7A
5966GS>His3/4 Control	5966GS>His3/4 RU	5966GS>His3/4; BchsRNAi Control	5966GS>His3/4; BchsRNAi RU
100.67	465.67	50.67	32
64	371	169.67	12.33
23.67	498.33	15.33	11
87.33	292	28.33	55
70.33	143	18.33	2.67
11.67	135.33	39.67	3.33
38	250	2	14
Data: Lmer_test
Models:
number.RU: number ~ RU + (1 | subject)
number.model: number ~ RU + Bchsi + (1 | subject)
Df AIC BIC logLik deviance Chisq Chi Df Pr(>Chisq)
number.RU 4 1092.1 1101.8 -542.07 1084.1
number.model 5 1082.0 1094.2 -536.01 1072.0 12.116 1 5e-04 ***
---
Signif. codes: 0 ‘***’ 0.001 ‘**’ 0.01 ‘*’ 0.05 ‘.’ 0.1 ‘ ’ 1
Data: Lmer_test
Models:
number.Bchsi: number ~ Bchsi + (1 | subject)
number.model: number ~ RU + Bchsi + (1 | subject)
Df AIC BIC logLik deviance Chisq Chi Df Pr(>Chisq)
number.Bchsi 4 1087.4 1097.1 -539.70 1079.4
number.model 5 1082.0 1094.2 -536.01 1072.0 7.39 1 0.006559 **
---
Signif. codes: 0 ‘***’ 0.001 ‘**’ 0.01 ‘*’ 0.05 ‘.’ 0.1 ‘ ’ 1
Data: Lmer_test
Models:
number.model: number ~ RU + Bchsi + (1 | subject)
number.interaction: number ~ RU * Bchsi + (1 | subject)
Df AIC BIC logLik deviance Chisq Chi Df Pr(>Chisq)
number.model 5 1082.0 1094.2 -536.01 1072.0
number.interaction 6 1066.2 1080.8 -527.12 1054.2 17.772 1 2.49e-05 ***
---
Signif. codes: 0 ‘***’ 0.001 ‘**’ 0.01 ‘*’ 0.05 ‘.’ 0.1 ‘ ’ 1
$lsmeans
RU Bchsi lsmean SE df lower.CL upper.CL
Control Bchsi 46.3 30.2 32.5 -15.29 107.9
RU Bchsi 18.6 30.2 32.5 -42.96 80.2
Control Control 56.5 30.2 32.5 -5.06 118.1
RU Control 307.9 30.2 32.5 246.32 369.5
Degrees-of-freedom method: kenward-roger
Confidence level used: 0.95
$contrasts
contrast estimate SE df t.ratio p.value
Control,Bchsi - RU,Bchsi 27.7 42.8 32.5 0.647 0.9159
Control,Bchsi - Control,Control -10.2 42.8 32.5 -0.239 0.9951
Control,Bchsi - RU,Control -261.6 42.8 32.5 -6.116 <.0001
RU,Bchsi - Control,Control -37.9 42.8 32.5 -0.886 0.8120
RU,Bchsi - RU,Control -289.3 42.8 32.5 -6.763 <.0001
Control,Control - RU,Control -251.4 42.8 32.5 -5.877 <.0001
P value adjustment: tukey method for comparing a family of 4 estimates

## Sheet: B
Figure 7B
day	5966GS>His3/4 Control	5966GS>His3/4 RU	5966GS>His3/4; BchsRNAi Control	5966GS>His3/4; BchsRNAi RU
0	1	1	1	1
2	1	1	1	1
5	1	1	1	1
8	1	1	1	1
10	1	1	1	1
13	1	1	1	1
15	1	1	1	1
18	1	1	0.994975	1
20	1	1	0.994975	1
22	1	1	0.98995	1
24	1	1	0.9799	0.994924
26	1	1	0.9799	0.989848
29	0.994764	1	0.974874	0.989848
32	0.994764	1	0.974874	0.989848
34	0.994764	1	0.974874	0.989848
36	0.994764	1	0.964824	0.989848
39	0.994764	1	0.954774	0.989848
41	0.989529	1	0.954774	0.989848
43	0.989529	1	0.94947	0.989848
46	0.989529	1	0.933557	0.973796
48	0.98397	1	0.928252	0.941693
50	0.972851	0.98895	0.922948	0.904239
53	0.961669	0.98895	0.917644	0.898889
55	0.956078	0.977901	0.896427	0.893506
57	0.928123	0.966851	0.843384	0.861211
60	0.888985	0.955673	0.806253	0.850446
62	0.827483	0.92773	0.747906	0.807385
64	0.799527	0.894197	0.71608	0.748177
66	0.738025	0.836877	0.657733	0.710499
68	0.581474	0.791021	0.578169	0.635143
70	0.352239	0.71596	0.472083	0.479048
72	0.257191	0.531196	0.392518	0.371397
74	0.223644	0.415719	0.297041	0.301424
76	0.156551	0.265598	0.212172	0.236833
78	0.117413	0.236729	0.153825	0.123799
81	0.0335466	0.109704	0.0901731	0.0753559
83	0.0223644	0.0692865	0.0371301	0.0322954
85	0.0055911	0.0519649	0.018565	0.0161477
88	0	0.0230955	0	0.00538257
90	0	0.00577387	0	0
93	0	0	0	0

## Sheet: C
Figure 7C
5966GS>His3/4 Control	5966GS>His3/4 RU	5966GS>His3/4; BchsRNAi Control	5966GS>His3/4; BchsRNAi RU
40.8	9.2	32.7	37
31.1	8.1	29.2	55.2
41.7	10.2	26.4	18.8
33.9	14.7	25.4	27.2
41.9	0	21.2	47
16	5	51.7	32.2
26.7	12.1	43.4	24.5
51.9		30.1
39.3
Df Sum Sq Mean Sq F value Pr(>F)
RU 1 1259.2 1259.2 12.460 0.001513 **
Bchsi 1 760.7 760.7 7.527 0.010665 *
RU:Bchsi 1 1665.8 1665.8 16.484 0.000378 ***
Residuals 27 2728.6 101.1
---
Signif. codes: 0 ‘***’ 0.001 ‘**’ 0.01 ‘*’ 0.05 ‘.’ 0.1 ‘ ’ 1
Tukey multiple comparisons of means
95% family-wise confidence level
Fit: aov(formula = ratio ~ RU * Bchsi, data = ANOVA_test_OE)
$RU
diff lwr upr p adj
RU-Control -12.80655 -20.25083 -5.362276 0.0015128
$Bchsi
diff lwr upr p adj
Control-Bchsi -9.908175 -17.32137 -2.494983 0.0106948
$`RU:Bchsi`
diff lwr upr p adj
RU:Bchsi-Control:Bchsi 2.035937 -12.20196 16.273830 0.9792412
Control:Control-Control:Bchsi 3.423795 -9.94377 16.791360 0.8958174
RU:Control-Control:Bchsi -24.023844 -38.26174 -9.785951 0.0004685
Control:Control-RU:Bchsi 1.387858 -12.47599 15.251707 0.9926454
RU:Control-RU:Bchsi -26.059781 -40.76461 -11.354949 0.0002532
RU:Control-Control:Control -27.447639 -41.31149 -13.583790 0.0000561

## Sheet: D
Figure 7D
5966GS>His3/4 Control	5966GS>His3/4 RU	5966GS>His3/4; BchsRNAi Control	5966GS>His3/4; BchsRNAi RU
11.11	0	0	11.11
11.11	5	16.67	12.5
14.29	0	16.67	17.65
15.79	0	7.69	6.67
6.25	0	11.76	17.65
17.65	5.88	5.88	10
29.25	10.53	11.11	15.79
15.79	0	15.79	25
11.11	0	12.5	12.5
0	0	14.29	25
Df Sum Sq Mean Sq F value Pr(>F)
RU 1 127.6 127.6 3.496 0.069680 .
Genotype 1 305.1 305.1 8.361 0.006463 **
RU:Genotype 1 596.4 596.4 16.343 0.000266 ***
Residuals 36 1313.6 36.5
---
Signif. codes: 0 ‘***’ 0.001 ‘**’ 0.01 ‘*’ 0.05 ‘.’ 0.1 ‘ ’ 1
Tukey multiple comparisons of means
95% family-wise confidence level
Fit: aov(formula = number ~ RU * Genotype, data = ANOVA_test)
$RU
diff lwr upr p adj
RU-Control -3.5715 -7.445626 0.3026255 0.0696801
$Genotype
diff lwr upr p adj
Control-bchsi -5.5235 -9.397626 -1.649374 0.0064631
$`RU:Genotype`
diff lwr upr p adj
RU:bchsi-Control:bchsi 4.151 -3.12468 11.42668 0.4269455
Control:Control-Control:bchsi 2.199 -5.07668 9.47468 0.8474478
RU:Control-Control:bchsi -9.095 -16.37068 -1.81932 0.0094253
Control:Control-RU:bchsi -1.952 -9.22768 5.32368 0.8874442
RU:Control-RU:bchsi -13.246 -20.52168 -5.97032 0.0001148
RU:Control-Control:Control -11.294 -18.56968 -4.01832 0.0009786

## Sheet: E
Figure 7E
5966GS>Bchs Control	5966GS>Bchs RU
103.33	714
17	877.33
28.33	555.67
161.33	563.33
21.33	274
4.67	362.67
80.33	185.33
Data: Lmer_test
Models:
number.subject: number ~ (1 | subject)
number.model: number ~ Bchs + (1 | subject)
Df AIC BIC logLik deviance Chisq Chi Df Pr(>Chisq)
number.subject 3 582.34 587.55 -288.17 576.34
number.model 4 569.90 576.85 -280.95 561.90 14.444 1 0.0001444 ***
---
Signif. codes: 0 ‘***’ 0.001 ‘**’ 0.01 ‘*’ 0.05 ‘.’ 0.1 ‘ ’ 1
$lsmeans
Bchs lsmean SE df lower.CL upper.CL
Bchs 504.6 67.6 16.3 361.5 648
Control 59.5 67.6 16.3 -83.6 203
Degrees-of-freedom method: kenward-roger
Confidence level used: 0.95
$contrasts
contrast estimate SE df t.ratio p.value
Bchs - Control 445 95.6 16.3 4.655 0.0003

## Sheet: F
Figure 7F
day	5966GS>Bchs Control	5966GS>Bchs RU
0	1	1
2	1	1
5	1	1
8	1	1
10	1	1
13	0.984043	1
15	0.978723	1
18	0.978723	1
20	0.978723	1
22	0.978723	1
24	0.978723	1
26	0.978723	1
29	0.978723	0.994975
32	0.978723	0.98995
34	0.978723	0.98995
36	0.978723	0.984925
39	0.978723	0.984925
41	0.978723	0.984925
43	0.978723	0.984925
46	0.961849	0.979629
48	0.956224	0.969039
50	0.944974	0.963743
53	0.944974	0.963743
55	0.933725	0.963743
57	0.911225	0.942207
60	0.866226	0.925773
62	0.736855	0.875277
64	0.686231	0.811515
66	0.613108	0.747753
68	0.511861	0.666601
70	0.393739	0.597043
72	0.286867	0.450709
74	0.230619	0.357055
76	0.118122	0.242071
78	0.0843727	0.211812
81	0.0224994	0.127087
83	0.00562485	0.0605178
85	0	0.0363107
88	0	0.0242071
90	0	0.00605178
93	0	0

## Sheet: G
Figure 7G
5966GS>Bchs Control	5966GS>Bchs RU
54.8	5
32.6	28.3
27.8	5.6
40	12
30.6	15.3
15.5	13.3
26.4	15.4
Table Analyzed	D50 tumour/dysplasia sum 5966GSxBchs
Column B	Bchs RU
vs.	vs,
Column A	Bchs Control
Unpaired t test
P value	0.0048
P value summary	**
Significantly different (P < 0.05)?	Yes
One- or two-tailed P value?	Two-tailed
t, df	t=3,452 df=12

## Sheet: H
Figure 7H
5966GS>Bchs Control	5966GS>Bchs RU
17.65	0
12.5	0
17.65	0
18.75	10.53
12.5	5.56
5.56	7.14
11.11	11.76
10.53	5.56
16.67	0
0	0
Table Analyzed	D60 his3+4 bchs et,ru
Column F	bchs RU
vs.	vs,
Column E	bchs Control
Unpaired t test
P value	0.0029
P value summary	**
Significantly different (P < 0.05)?	Yes
One- or two-tailed P value?	Two-tailed
t, df	t=3,437 df=18
