# Supplementary material for: A TORC1-histone axis regulates chromatin organisation and non-canonical induction of autophagy to ameliorate ageing
Source: eLife. 2021 May 14;10:e62233. doi: 10.7554/eLife.62233 (PMC8186904; doi:10.7554/eLife.62233)
Supplement: Figure 8—source data 1. [file elife-62233-fig8-data1.xlsx]

## Sheet: B
Figure 8B
Histone H2A
	Control			Rapamycin
12m	1.14495	1.34213	0.512917	1.57239	2.26204	1.23703
22m	0.637583	0.946357	0.526303	0.891601	0.975675	1.09045
Table Analyzed	Jejunum H2A
Two-way ANOVA	Ordinary
Alpha	0.05
Source of Variation	% of total variation	P value	P value summary	Significant?
Interaction	4.76	0.355	ns	No
time	28.66	0.0426	*	Yes
treatment	27.07	0.0473	*	Yes
ANOVA table	SS	DF	MS	F (DFn, DFd)	P value
Interaction	0.1248	1	0.1248	F (1, 8) = 0,9638	P=0,3550
time	0.7517	1	0.7517	F (1, 8) = 5,804	P=0,0426
treatment	0.71	1	0.71	F (1, 8) = 5,482	P=0,0473
Residual	1.036	8	0.1295
Number of missing values	0
Histone H2B
	Control			Rapamycin
12m	1.1102	0.9829	0.906899	1.06018	1.11128	1.0555
22m	0.746832	0.706008	0.81904	0.968934	0.920582	0.801231
Table Analyzed	Jejunum H2B
Two-way ANOVA	Ordinary
Alpha	0.05
Source of Variation	% of total variation	P value	P value summary	Significant?
Interaction	1.424	0.4787	ns	No
time	61.81	0.0012	**	Yes
treatment	16.13	0.0369	*	Yes
ANOVA table	SS	DF	MS	F (DFn, DFd)	P value
Interaction	0.003069	1	0.003069	F (1, 8) = 0,552	P=0,4787
time	0.1332	1	0.1332	F (1, 8) = 23,96	P=0,0012
treatment	0.03476	1	0.03476	F (1, 8) = 6,252	P=0,0369
Residual	0.04447	8	0.005559
Number of missing values	0
Histone H3
	Control			Rapamycin
12m	1.19255	0.991184	0.816268	1.23228	1.00742	1.30114
22m	0.979614	0.627473	0.895159	1.18675	1.04458	1.67502
Table Analyzed	Jejunum H3
Two-way ANOVA	Ordinary
Alpha	0.05
Source of Variation	% of total variation	P value	P value summary	Significant?
Interaction	7.929	0.2999	ns	No
time	0.1861	0.8694	ns	No
treatment	40.25	0.0371	*	Yes
ANOVA table	SS	DF	MS	F (DFn, DFd)	P value
Interaction	0.0621	1	0.0621	F (1, 8) = 1,229	P=0,2999
time	0.001457	1	0.001457	F (1, 8) = 0,02883	P=0,8694
treatment	0.3152	1	0.3152	F (1, 8) = 6,236	P=0,0371
Residual	0.4044	8	0.05055
Number of missing values	0
Histone H4
	Control			Rapamycin
12m	1.09926	1.0077	0.89304	1.86216	1.49447	1.57218
22m	0.925363	0.825854	0.868105	1.61808	1.81569	1.90982
Table Analyzed	Jejunum H4
Two-way ANOVA
Source of Variation	% of total variation	P value
Interaction	2.63	0.1274
treatment	90.08	< 0,0001
time	0	0.9437
Source of Variation	P value summary	Significant?
Interaction	ns	No
treatment	****	Yes
time	ns	No
Source of Variation	Df	Sum-of-squares	Mean square	F
Interaction	1	0.05273	0.05273	2.893
treatment	1	1.804	1.804	99.01
time	1	9.685e-05	9.685e-05	0.005314
Residual	8	0.1458	0.01822
Number of missing values	0

## Sheet: C
Figure 8C
12m Control	12m Rapa	22m Control	22m Rapa
1.08964	0.893623	1.31586	1.15726
1.2585	1.19256	1.23268	0.890537
1.45749	1.03377	1.18241	0.921391
Data: Lmer_test
Models:
ratio.Age: ratio ~ Age + (1 | subject)
ratio.model: ratio ~ Age + Rapamycin + (1 | subject)
Df AIC BIC logLik deviance Chisq Chi Df Pr(>Chisq)
ratio.Age 4 185.08 201.94 -88.538 177.08
ratio.model 5 173.18 194.26 -81.589 163.18 13.897 1 0.0001931 ***
---
Signif. codes: 0 ‘***’ 0.001 ‘**’ 0.01 ‘*’ 0.05 ‘.’ 0.1 ‘ ’ 1
Data: Lmer_test
Models:
ratio.Rapamycin: ratio ~ Rapamycin + (1 | subject)
ratio.model: ratio ~ Age + Rapamycin + (1 | subject)
Df AIC BIC logLik deviance Chisq Chi Df Pr(>Chisq)
ratio.Rapamycin 4 172.92 189.78 -82.459 164.92
ratio.model 5 173.18 194.26 -81.589 163.18 1.7388 1 0.1873
Data: Lmer_test
Models:
ratio.model: ratio ~ Age + Rapamycin + (1 | subject)
ratio.interaction: ratio ~ Age * Rapamycin + (1 | subject)
Df AIC BIC logLik deviance Chisq Chi Df Pr(>Chisq)
ratio.model 5 173.18 194.26 -81.589 163.18
ratio.interaction 6 175.17 200.47 -81.583 163.17 0.0124 1 0.9114
$lsmeans
Age Rapamycin lsmean SE df lower.CL upper.CL
12 Control 1.324 0.0665 18.0 1.185 1.46
22 Control 1.244 0.0666 18.1 1.104 1.38
12 Rapamycin 1.039 0.0667 18.1 0.899 1.18
22 Rapamycin 0.971 0.0667 18.1 0.831 1.11
Degrees-of-freedom method: kenward-roger
Confidence level used: 0.95
$contrasts
contrast estimate SE df t.ratio p.value
12,Control - 22,Control 0.0803 0.0941 18.0 0.854 0.8281
12,Control - 12,Rapamycin 0.2851 0.0941 18.1 3.028 0.0332
12,Control - 22,Rapamycin 0.3533 0.0941 18.1 3.754 0.0072
22,Control - 12,Rapamycin 0.2048 0.0942 18.1 2.173 0.1686
22,Control - 22,Rapamycin 0.2730 0.0942 18.1 2.897 0.0433
12,Rapamycin - 22,Rapamycin 0.0682 0.0943 18.1 0.724 0.8863
P value adjustment: tukey method for comparing a family of 4 estimates

## Sheet: D
Figure 8D
		total (mono+di+tri)			mono			di			tri
22m Control	1'	0.54	0.398	0.557	0.287	0.265	0.196	0.152	0.161	0.121	0.117	0.114	0.081
	2'	0.329	0.392	0.731	0.351	0.192	0.207	0.211	0.088	0.116	0.17	0.05	0.069
	5'	0.839	1.366	0.331	0.186	0.495	0.798	0.086	0.217	0.345	0.059	0.127	0.222
	10'	1.051	0.838	1.08	0.761	0.763	0.617	0.219	0.203	0.163	0.1	0.085	0.059
22m Rapa	1'	0.451	0.284	0.133	0.214	0.109	0.072	0.137	0.088	0.041	0.1	0.087	0.02
	2'	0.61	0.791	0.78	0.266	0.357	0.326	0.193	0.257	0.248	0.151	0.178	0.206
	5'	1.874	1.191	1.734	1.1	0.654	0.985	0.481	0.339	0.474	0.294	0.198	0.274
	10'	1.786	1.554	1.594	1.386	1.138	1.168	0.277	0.308	0.292	0.123	0.108	0.134
*Only show those on figure
Table Analyzed	Mouse Je (C+R) 22m total
Two-way ANOVA	Ordinary
Alpha	0.05
Source of Variation	% of total variation	P value	P value summary	Significant?
Interaction	13.57	0.0186	*	Yes
Time	58.01	<0,0001	****	Yes
Treatment	12.18	0.0032	**	Yes
ANOVA table	SS	DF	MS	F (DFn, DFd)	P value
Interaction	0.87	3	0.29	F (3, 16) = 4,454	P=0,0186
Time	3.72	3	1.24	F (3, 16) = 19,05	P<0,0001
Treatment	0.7812	1	0.7812	F (1, 16) = 12	P=0,0032
Residual	1.042	16	0.0651
Number of missing values	0
Tukey's multiple comparisons test	Mean Diff,	95,00% CI of diff,	Significant?	Summary
1':Control vs. 1':Rapamycin	0.209	-0,5123 to 0,9303	No	ns
1':Control vs. 2':Control	0.01433	-0,7069 to 0,7356	No	ns
1':Control vs. 2':Rapamycin	-0.2287	-0,9499 to 0,4926	No	ns
1':Control vs. 5':Control	-0.347	-1,068 to 0,3743	No	ns
1':Control vs. 5':Rapamycin	-1.101	-1,823 to -0,3801	Yes	**
1':Control vs. 10':Control	-0.4913	-1,213 to 0,2299	No	ns
1':Control vs. 10':Rapamycin	-1.146	-1,868 to -0,4251	Yes	***
1':Rapamycin vs. 2':Control	-0.1947	-0,9159 to 0,5266	No	ns
1':Rapamycin vs. 2':Rapamycin	-0.4377	-1,159 to 0,2836	No	ns
1':Rapamycin vs. 5':Control	-0.556	-1,277 to 0,1653	No	ns
1':Rapamycin vs. 5':Rapamycin	-1.31	-2,032 to -0,5891	Yes	***
1':Rapamycin vs. 10':Control	-0.7003	-1,422 to 0,02093	No	ns
1':Rapamycin vs. 10':Rapamycin	-1.355	-2,077 to -0,6341	Yes	***
2':Control vs. 2':Rapamycin	-0.243	-0,9643 to 0,4783	No	ns
2':Control vs. 5':Control	-0.3613	-1,083 to 0,3599	No	ns
2':Control vs. 5':Rapamycin	-1.116	-1,837 to -0,3944	Yes	**
2':Control vs. 10':Control	-0.5057	-1,227 to 0,2156	No	ns
2':Control vs. 10':Rapamycin	-1.161	-1,882 to -0,4394	Yes	***
2':Rapamycin vs. 5':Control	-0.1183	-0,8396 to 0,6029	No	ns
2':Rapamycin vs. 5':Rapamycin	-0.8727	-1,594 to -0,1514	Yes	*
2':Rapamycin vs. 10':Control	-0.2627	-0,9839 to 0,4586	No	ns
2':Rapamycin vs. 10':Rapamycin	-0.9177	-1,639 to -0,1964	Yes	**
5':Control vs. 5':Rapamycin	-0.7543	-1,476 to -0,03307	Yes	*
5':Control vs. 10':Control	-0.1443	-0,8656 to 0,5769	No	ns
5':Control vs. 10':Rapamycin	-0.7993	-1,521 to -0,07807	Yes	*
5':Rapamycin vs. 10':Control	0.61	-0,1113 to 1,331	No	ns
5':Rapamycin vs. 10':Rapamycin	-0.045	-0,7663 to 0,6763	No	ns
10':Control vs. 10':Rapamycin	-0.655	-1,376 to 0,06626	No	ns

## Sheet: E
Figure 8E
Wdfy3
	Control				Rapamycin
12m	1.07736	0.967883	0.731366	1.22339	1.09281	1.01902	1.30659	1.54363
22m	0.909551	0.918009	0.501655	1.10914	1.23034	1.63871	1.56226	1.15585
Table Analyzed	Mouse Rapa 12m 22m B2m
Two-way ANOVA	Ordinary
Alpha	0.05
Source of Variation	% of total variation	P value	P value summary	Significant?
Interaction	6.485	0.2312	ns	No
Time	0.01855	0.9473	ns	No
Treatment	44.56	0.0063	**	Yes
ANOVA table	SS	DF	MS	F (DFn, DFd)	P value
Interaction	0.08803	1	0.08803	F (1, 12) = 1,59	P=0,2312
Time	0.0002518	1	0.0002518	F (1, 12) = 0,004549	P=0,9473
Treatment	0.6048	1	0.6048	F (1, 12) = 10,93	P=0,0063
Residual	0.6642	12	0.05535
Number of missing values	0
Tukey's multiple comparisons test	Mean Diff,	95,00% CI of diff,	Significant?	Summary	Adjusted P Value
12m:Control vs. 12m:Rapa	-0.2405	-0,7344 to 0,2534	No	ns	0.4969
12m:Control vs. 22m:Control	0.1404	-0,3535 to 0,6343	No	ns	0.8326
12m:Control vs. 22m:Rapa	-0.3968	-0,8907 to 0,0971	No	ns	0.1331
12m:Rapa vs. 22m:Control	0.3809	-0,113 to 0,8748	No	ns	0.155
12m:Rapa vs. 22m:Rapa	-0.1563	-0,6502 to 0,3376	No	ns	0.7848
22m:Control vs. 22m:Rapa	-0.5372	-1,031 to -0,04332	Yes	*	0.0318
