# Supplementary material for: A TORC1-histone axis regulates chromatin organisation and non-canonical induction of autophagy to ameliorate ageing
Source: eLife journal article supplement (doi:10.7554/elife.62233), 2021-05-14
Supplement: supp [file elife_poa_e62233_Supplementary_file_8.docx]

## Supplementary file 8. Key resources table

| **Reagent type (species) or resource** | **Designation** | **Source or reference** | **Identifiers** | **Additional information** |
| --- | --- | --- | --- | --- |
| Antibody | Histone H2A antibody  (rabbit polyclonal) | Activ motif | Cat# 39209  RRID: AB_2793184 | WB (1:1000) |
| Antibody | Anti-Histone H2B antibody - ChIP Grade  (mouse monoclonal) | Abcam | Cat# ab52484  RRID: AB_1139809 | WB  (1:10000) |
| Antibody | Anti-Histone H3 antibody - ChIP Grade  (rabbit polyclonal) | Abcam | Cat# ab1791  RRID: AB_302613 | WB  (1:10000) |
| Antibody | Histone H4 antibody (pAb)  (rabbit polyclonal) | Activ motif | Cat# 39269  RRID: AB_2636967 | WB  (1:3000) |
| Antibody | LaminC  (mouse monoclonal) | Developmental Studies Hybridoma Bank | Cat# LC28.26  RRID: AB_528339 | WB  (1:3000) |
| Antibody | Atg1  (rabbit polyclonal) | From Jun Hee Lee’s lab, USA |  | WB  (1:2000) |
| Antibody | Atg8a  (rabbit polyclonal) | From Péter Nagy’s lab, Hungary |  | WB  (1:3000) |
| Antibody | Phospho-Drosophila p70 S6 Kinase (Thr398)  (rabbit polyclonal) | Cell Signaling | Cat#9209  RRID: AB_2269804 | WB  (1:1000) |
| Antibody | total S6K  (rabbit polyclonal) | Self-made |  | WB  (1:1000) |
| Antibody | Anti-Histone H3 (tri methyl K4) antibody - ChIP Grade  (rabbit polyclonal) | Abcam | Cat# ab8580  RRID: AB_306649 | ChIP  (2µg) |
| Antibody | Anti-Histone H3 (tri methyl K9) antibody - ChIP Grade  (rabbit polyclonal) | Abcam | Cat# ab8898  RRID: AB_306848 | ChIP  (2µg) |
| Antibody | Anti-trimethyl-Histone H3 (Lys27) Antibody  (rabbit polyclonal) | Merckmillipore | Cat# 07-449  RRID: AB_310624 | ChIP  (2µg) |
| Antibody | HP1  (mouse monoclonal) | Developmental Studies Hybridoma Bank | Cat# C1A9  RRID: AB_528276 | IF  (1:500) |
| Antibody | Mouse (G3A1) mAb IgG1 Isotype Control  (mouse monoclonal) | Cell Signaling | Cat# 5415  RRID: AB_10829607 | ChIP  (2µg) |
| Antibody | Rabbit IgG, polyclonal - Isotype Control  (rabbit polyclonal) | Abcam | Cat# ab171870  RRID: AB_2687657 | ChIP  (2µg) |
| Antibody | Coracle  (mouse monoclonal) | Developmental Studies Hybridoma Bank | Cat# C615.16  RRID:AB_1161644 | IF  (1:100) |
| Antibody | Phospho-Histone H3 (Ser10)  (rabbit polyclonal) | Cell Signaling | Cat# 9701  RRID: AB_331535 | IF  (1:500) |
| Antibody | Lamin A/C  (rabbit polyclonal) | Cell Signaling | Cat# 2032  RRID: AB_2136278 | IF  (1:500) |
| Antibody | Prospero  (mouse monoclonal) | DSHB | Cat# MR1A  RRID: AB_528440 | IF  (1:200) |
| Antibody | Goat anti-Mouse IgG (H+L) Cross-Adsorbed Secondary Antibody, Alexa Fluor 488 | Thermo Fisher Scientific | Cat# A11001  RRID: AB_2534069 | IF  (1:1000) |
| Antibody | Goat anti-Rabbit IgG (H+L) Cross-Adsorbed Secondary Antibody, Alexa Fluor 594 | Thermo Fisher Scientific | Cat# A11012  RRID: AB_2534079 | IF  (1:1000) |
| Chemical compound, drug | Rapamycin | LC Laboratories | Cat# R-5000 |  |
| Chemical compound, drug | RU486 (Mifepristone) | Sigma | Cat# M8046 |  |
| Chemical compound, drug | Cycloheximide | Sigma | Cat# 239763 |  |
| Chemical compound, drug | Bortezomib | Sigma | Cat# 5043140001 |  |
| Chemical compound, drug | Brilliant Blue FCF | Sigma | Cat# 80717 |  |
| Commercial assay or kit | TRIzol™ Reagent | Invitrogen | Cat#[15596018](http://www.thermofisher.com/order/catalog/product/15596018) |  |
| Commercial assay or kit | SuperScript III First Strand Master Mix | Invitrogen | Cat#[15596018](http://www.thermofisher.com/order/catalog/product/15596018) |  |
| Commercial assay or kit | High Sensitivity D5000 ScreenTape | Agilent Technologies | Cat# 5067-5593 |  |
| Commercial assay or kit | VECTASHIELD Antifade Mounting Medium | Vector Laboratories | Cat# H-1000  RRID: AB_2336789 |  |
| Commercial assay or kit | RIPA Lysis and Extraction Buffer | Thermo Scientific | Cat# 89901 |  |
| Commercial assay or kit | 4–20% Criterion™ TGX Stain-Free™ Protein Gel, 26 well, 15 µl | BioRad | Cat# 5678095 |  |
| Commercial assay or kit | Amersham™ Hybond® P Western blotting membranes, PVDF | GE Healthcare Amersham | Cat# GE10600023 |  |
| Commercial assay or kit | PhosSTOP™ | Roche | Cat# 04906837001 |  |
| Commercial assay or kit | cOmplete™, Mini, EDTA-free Protease Inhibitor Cocktail | Roche | Cat# 11836170001 |  |
| Commercial assay or kit | Qubit™ dsDNA HS Assay Kit | Invitrogen | Cat# Q32854 |  |
| Commercial assay or kit | Qubit™ dsRNA HS Assay Kit | Invitrogen | Cat# Q32852 |  |
| Commercial assay or kit | Pierce™ BCA Protein Assay Kit | Thermo Scientific | Cat# 23227 |  |
| Commercial assay or kit | Power SYBR™ Green PCR Master Mix | Appplied Biosystems | Cat# 4367659 |  |
| Commercial assay or kit | TaqMan™ Gene Expression Master Mix | Applied Biosystems | Cat# 4369016 |  |
| Commercial assay or kit | EZ Nucleosomal DNA Prep Kit | Zymo Research | Cat# D5220 |  |
| Commercial assay or kit | LysoTracker™ Red DND-99 | Invitrogen | Cat# L7528 |  |
| Commercial assay or kit | Cyto-ID ® Autophagy detection kit 2.0 | Enzo Life Sciences | Cat# ENZ-KIT175 |  |
| Strain, strain background (*D. melanogaster*) | *wDah* | This lab |  |  |
| Genetic reagent (*D. melanogaster*) | *DaGS* | Bloomington Drosophila Stock Center | 8641 |  |
| Genetic reagent (*D. melanogaster*) | *5966GS* | (Guo et al., 2014) |  |  |
| Genetic reagent (*D. melanogaster*) | *esgGal4* | Kyoto Stock Center | 104863 |  |
| Genetic reagent (*D. melanogaster*) | *UAS-H3[RNAi]* | Vienna Drosophila Resource Center | KK109374 |  |
| Genetic reagent (*D. melanogaster*) | *UAS-H4[RNAi]* | Vienna Drosophila Resource Center | KK109059 |  |
| Genetic reagent (*D. melanogaster*) | *UAS-Bchs[RNAi]* | Vienna Drosophila Resource Center | KK110785 |  |
| Genetic reagent (*D. melanogaster*) | *UAS-Bchs.HA* | Bloomington Drosophila Stock Center | 51636 |  |
| Genetic reagent (*D. melanogaster*) | *UAS-Atg5[RNAi]* | (Ren et al., 2009; Scott et al., 2004) |  |  |
| Genetic reagent (*D. melanogaster*) | *UAS-Atg1[RNAi]* | Bloomington Drosophila Stock Center | 26731 |  |
| Genetic reagent (*D. melanogaster*) | *UAS-eIF3d[RNAi]* | Vienna Drosophila Resource Center | 330545 |  |
| Genetic reagent (*D. melanogaster*) | *UAS-eIF3g[RNAi]* | Vienna Drosophila Resource Center | GD28937 |  |
| Genetic reagent (*D. melanogaster*) | *UAS-eIF4e[RNAi]* | Vienna Drosophila Resource Center | GD7800 |  |
| Genetic reagent (*D. melanogaster*) | *UAS-H3/H4* | This lab |  |  |
| Genetic reagent (*D. melanogaster*) | *UAS-mCD8::GFP.L* | Bloomington Drosophila Stock Center | 5137 |  |
| Strain, strain background (Mouse) | UM-HET3 stock (CByB6F1 x C3D2F1) | This lab |  |  |
| Sequence-based reagent | Primer for Q-RT-PCR  Act5C_F1: AGGCCAACCGTGAGAAGATG | This paper |  |  |
| Sequence-based reagent | Primer for Q-RT-PCR  Act5C_R1: GGGGAAGGGCATAACCCTC | This paper |  |  |
| Sequence-based reagent | Primer for Q-RT-PCR  His3_F1: CCACGCAAACAACTGGCTAC | This paper |  |  |
| Sequence-based reagent | Primer for Q-RT-PCR  His3_R1: TGCGGATTAGAAGCTCGGTG | This paper |  |  |
| Sequence-based reagent | Primer for Q-RT-PCR  His4_F1: CGGATAGCAGGCTTCGTGAT | This paper |  |  |
| Sequence-based reagent | Primer for Q-RT-PCR  His4_R1: GGTCGTGGTAAAGGAGGCAA | This paper |  |  |
| Sequence-based reagent | Primer for Q-RT-PCR  Bchs_F1: AGCCTCACCACGCTAAAGAAG | This paper |  |  |
| Sequence-based reagent | Primer for Q-RT-PCR  Bchs_R1: CTCATGTCGTTTGACGGACAG | This paper |  |  |
| Sequence-based reagent | Primer for Q-RT-PCR  DOR_F1: CTTGATCTCGGGGTGTCGAC | This paper |  |  |
| Sequence-based reagent | Primer for Q-RT-PCR  DOR_R1: CTTCAACTGTACGGCCGCAT | This paper |  |  |
| Sequence-based reagent | Primer for Q-RT-PCR  Stat92_F1: AAGCTGCTTGCCCAAAACTAC | This paper |  |  |
| Sequence-based reagent | Primer for Q-RT-PCR  Stat92_R1: GACGCATTGTGAGTACGATGG | This paper |  |  |
| Sequence-based reagent | Primer for Q-RT-PCR  B2m_Mouse_F1: TTCTGGTGCTTGTCTCACTGA | This paper |  |  |
| Sequence-based reagent | Primer for Q-RT-PCR  B2m_Mouse_R1: CAGTATGTTCGGCTTCCCATTC | This paper |  |  |
| Sequence-based reagent | Primer for Q-RT-PCR  Wdfy3_Mouse_F1: GAGGCTCTGGAGTGTGATTACG | This paper |  |  |
| Sequence-based reagent | Primer for Q-RT-PCR  Wdfy3_Mouse_R1: GTGGCCGTCTCCTTCAGTG | This paper |  |  |
| Sequence-based reagent | Primer for ChIP-Q-PCR  Bchs_ChIP_F1: AGAACAGCTGTCTCGCACAA | This paper |  |  |
| Sequence-based reagent | Primer for ChIP-Q-PCR  Bchs_ChIP_R1: CCTACATAGCGAGCAAGCGA | This paper |  |  |
| Sequence-based reagent | Primer for ChIP-Q-PCR  DOR_ChIP_F1: ATTCGCTCGTCAGTCGTTGT | This paper |  |  |
| Sequence-based reagent | Primer for ChIP-Q-PCR  DOR_ChIP_R1: TAACTGACGGGGGTGAGAGT | This paper |  |  |
| Sequence-based reagent | Primer for ChIP-Q-PCR  Stat92E_ChIP_F1: AAGCGATCCACATGCGATACT | This paper |  |  |
| Sequence-based reagent | Primer for ChIP-Q-PCR  Stat92E_ChIP_R1: TCCTATCTTCCCGGTTTGGC | This paper |  |  |
| Recombinant DNA  reagent | Plasmid: pUAST attb H3 | This paper |  |  |
| Software, Algorithms | Microsoft Excel | Microsoft | <https://www.microsoft.com/en-gb/> |  |
| Software, Algorithms | GraphPad Prism | GraphPad | <https://www.graphpad.com/scientific-software/prism/> |  |
| Software, Algorithms | Adobe Illustrator | Adobe | <https://www.adobe.com/uk/products/illustrator.html> |  |
| Software, Algorithms | ImageJ | ImageJ | https://imagej.nih.gov/ij/ |  |
| Software, Algorithms | Leica LAS X-3D | Leica | https://www.leica-microsystems.com/de/produkte/mikroskop-software/details/product/leica-las-x-ls/ |  |
| Software, Algorithms | Imaris | Bitplane | http://www.bitplane.com/imaris |  |
| Software, Algorithms | Flexbar | (Dodt et al., 2012) |  |  |
| Software, Algorithms | HiSat | (Kim et al., 2015) |  |  |
| Software, Algorithms | SAMtools | (Li et al., 2009) | http://samtools.sourceforge.net/ |  |
| Software, Algorithms | StringTie | (Pertea et al., 2015) |  |  |
| Software, Algorithms | R statistics package | R Core Team | <https://www.r-project.org/> |  |
| Other | Rapamycin gut RNA-seq analysed data | This paper | GEO: GSE148002 |  |
