# Supplementary material for: A TORC1-histone axis regulates chromatin organisation and non-canonical induction of autophagy to ameliorate ageing
Source: eLife. 2021 May 14;10:e62233. doi: 10.7554/eLife.62233 (PMC8186904; doi:10.7554/eLife.62233)
Supplement: Supplementary file 1. — Related to Figure 1. [file elife-62233-supp1.xlsx]

## Sheet: Supplementary file 1
Supplementary file 1. Inhibition of mTORC1 activity by rapamycin treatment extends lifespan in females.
Genotype/Treatment	Median Lifespan (days)	Maximum Lifespan (days)	n Dead	n Censored	% Increase (med) vs control	% Increase (max) vs control	p-value (log rank) vs control	Control
wDah - EtOH	71	86	149	11				*
wDah - rapamycin	76	93	151	9	0.0704225	0.0813953	7.38797e-08
