# Supplementary material for: A TORC1-histone axis regulates chromatin organisation and non-canonical induction of autophagy to ameliorate ageing
Source: eLife. 2021 May 14;10:e62233. doi: 10.7554/eLife.62233 (PMC8186904; doi:10.7554/eLife.62233)
Supplement: Supplementary file 2. — Related to Figure 4. [file elife-62233-supp2.xlsx]

## Sheet: Supplementary file 2
Supplementary file 2. Knock-down of histone H3 or H4 in adult ECs blocks rapamycin-induced lifespan extension
A. Lifespan
Genotype/Treatment	Median Lifespan (days)	Maximum Lifespan (days)	n Dead	n Censored	% Increase (med) vs control	% Increase (max) vs control	Control	p-value (log rank)
								5966GS>His3 [RNAi] - RU486	5966GS>His3 [RNAi] - rapamycin	5966GS>His3 [RNAi] - RU486+rapamcyin
5966GS>His3 [RNAi] - EtOH	68	85	193	5			*	0.177804	3.79945e-08	0.74436
5966GS>His3 [RNAi] - RU486	68	87	195	4	0	0.0235294			7.69207e-06	0.0954416
5966GS>His3 [RNAi] - rapamycin	72	90	189	10	0.0588235	0.0588235				5.00331e-11
5966GS>His3 [RNAi] - RU486+rapamcyin	68	87	195	3	0	0.0235294
								5966GS>His4 [RNAi] - RU486	5966GS>His4 [RNAi] - rapamycin	5966GS>His4 [RNAi] - RU486+rapamcyin
5966GS>His4 [RNAi] - EtOH	65	86	194	5			*	0.552744	2.61268e-12	0.0586015
5966GS>His4 [RNAi] - RU486	66	84	199	0	0.0153846	-0.0232558			2.19675e-09	0.233472
5966GS>His4 [RNAi] - rapamycin	71	89	194	5	0.0923077	0.0348837				9.04451e-07
5966GS>His4 [RNAi] - RU486+rapamcyin	67	84	196	3	0.0307692	-0.0232558
B. Cox Proportional Hazard (CPH) analysis
Details	Coefficient	Coefficient (estimate)	exp(coeff)	SE (coeff)	z	p
Knock-down of H3 in adult ECs	rapamycin	-0.521	0.594	0.103	-5.05	4.4e-07
dead = 772	RU486	-0.123	0.884	0.102	-1.21	0.22
censored = 22	RU486:rapamycin	0.72	2.054	0.145	4.96	6.9e-07
Knock-down of H4 in adult ECs	rapamycin	-0.6416	0.5264	0.103	-6.23	4.7e-10
dead = 783	RU486	-0.0788	0.9243	0.1013	-0.78	0.43684
censored = 13	RU486:rapamycin	0.526	1.6922	0.1438	3.66	0.00026
