# Supplementary material for: A TORC1-histone axis regulates chromatin organisation and non-canonical induction of autophagy to ameliorate ageing
Source: eLife. 2021 May 14;10:e62233. doi: 10.7554/eLife.62233 (PMC8186904; doi:10.7554/eLife.62233)
Supplement: Supplementary file 3. — Related to Figure 4. [file elife-62233-supp3.xlsx]

## Sheet: Supplementary file 3
Supplementary file 3. Over-expression of H3/H4 in ECs recapitulates rapamycin-induced lifespan extension.
A. Lifespan
Genotype/Treatment	Median Lifespan (days)	Maximum Lifespan (days)	n Dead	n Censored	% Increase (med) vs control	% Increase (max) vs control	Control	p-value (log rank)
								5966GS>His3/4 - RU486	5966GS>His3/4 - rapamycin	5966GS>His3/4 - RU486+rapamycin
5966GS>His3/4 - EtOH	69	91	189	10			*	0.00118808	3.06126e-07	9.6821e-06
5966GS>His3/4 - RU486	74	93	191	8	0.0724638	0.021978			0.105071	0.356752
5966GS>His3/4 - rapamycin	76	93	191	8	0.101449	0.021978				0.476734
5966GS>His3/4 - RU486+rapamycin	76	93	188	11	0.101449	0.021978
B. Cox Proportional Hazard (CPH) analysis
Details	Coefficient	Coefficient (estimate)	exp(coeff)	SE (coeff)	z	p
dead = 759	rapamycin	-0.489	0.613	0.103	-4.74	2.2e-06
censored = 37	RU486	-0.35	0.705	0.103	-3.4	0.00067
	RU486:rapamycin	0.408	1.504	0.145	2.81	0.00501
