# Supplementary material for: A TORC1-histone axis regulates chromatin organisation and non-canonical induction of autophagy to ameliorate ageing
Source: eLife. 2021 May 14;10:e62233. doi: 10.7554/eLife.62233 (PMC8186904; doi:10.7554/eLife.62233)
Supplement: Supplementary file 4. — Related to Figure 6. [file elife-62233-supp4.xlsx]

## Sheet: Supplementary file 4
Supplementary file 4. Knock-down of Atg5 associated with the expression of H3/H4 in ECs abolished the benefits of increased histones on lifespan extension.
A. Lifespan
Genotype/Treatment	Median Lifespan (days)	Maximum Lifespan (days)	n Dead	n Censored	% Increase (med) vs control	% Increase (max) vs control	Control	p-value (log rank)
								5966GS>His3/4 - RU486	5966GS>His3/4 Atg5 [RNAi] - EtOH	5966GS>His3/4 Atg5 [RNAi] - RU486
5966GS>His3/4 - EtOH	61	79	193	6			*	0.000113851	0.179966	0.0703353
5966GS>His3/4 - RU486	65	82	183	16	0.0655738	0.0379747			2.86955e-07	4.1751e-08
5966GS>His3/4 Atg5 [RNAi] - EtOH	61	75	188	14	0	-0.0506329				0.493668
5966GS>His3/4 Atg5 [RNAi] - RU486	61	82	194	5	0	0.0379747
B. Cox Proportional Hazard (CPH) analysis
Details	Coefficient	Coefficient (estimate)	exp(coeff)	SE (coeff)	z	p
dead = 758	Atg5 [RNAi]	0.133	1.142	0.103	1.3	0.1948
censored = 41	RU486	-0.372	0.689	0.104	-3.58	0.00035
	RU486:Atg5i [RNAi]	0.407	1.502	0.146	2.8	0.00519
