# Supplementary material for: A TORC1-histone axis regulates chromatin organisation and non-canonical induction of autophagy to ameliorate ageing
Source: eLife. 2021 May 14;10:e62233. doi: 10.7554/eLife.62233 (PMC8186904; doi:10.7554/eLife.62233)
Supplement: Supplementary file 5. — Related to Figure 7. [file elife-62233-supp5.xlsx]

## Sheet: Supplementary file 5
Supplementary file 5. Knock-down of Bchs associated with the expression of H3/H4 in ECs abolished the benefits of increased histones on lifespan extension.
A. Lifespan
Genotype/Treatment	Median Lifespan (days)	Maximum Lifespan (days)	n Dead	n Censored	% Increase (med) vs control	% Increase (max) vs control	Control	p-value (log rank)
								5966GS>His3/4 - RU486	5966GS>His3/4 Bchs [RNAi] - EtOH	5966GS>His3/4 Bchs [RNAi] - RU486
5966GS>His3/4 - EtOH	69	85	178	21			*	7.5463e-08	0.168548	0.10364
5966GS>His3/4 - RU486	73	90	173	26	0.057971	0.0588235			0.000396563	0.000347151
5966GS>His3/4 Bchs [RNAi] - EtOH	69	88	187	12	0	0.0352941				0.899911
5966GS>His3/4 Bchs [RNAi] - RU486	69	88	185	14	0	0.0352941
B. Cox Proportional Hazard (CPH) analysis
Details	Coefficient	Coefficient (estimate)	exp(coeff)	SE (coeff)	z	p
dead = 723	bchs [RNAi]	-0.193	0.825	0.105	-1.83	0.06703
censored = 73	RU486	-0.55	0.577	0.109	-5.05	4.4e-07
	RU486:bchs [RNAi]	0.552	1.736	0.151	3.67	0.00025
