# Supplementary material for: A TORC1-histone axis regulates chromatin organisation and non-canonical induction of autophagy to ameliorate ageing
Source: eLife. 2021 May 14;10:e62233. doi: 10.7554/eLife.62233 (PMC8186904; doi:10.7554/eLife.62233)
Supplement: Supplementary file 6. — Related to Figure 7—figure supplement 1. [file elife-62233-supp6.xlsx]

## Sheet: Supplementary file 6
Supplementary file 6. Knock-down of Bchs in ECs abolished rapamycin-induced lifespan extension.
A. Lifespan
Genotype/Treatment	Median Lifespan (days)	Maximum Lifespan (days)	n Dead	n Censored	% Increase (med) vs control	% Increase (max) vs control	Control	p-value (log rank)
								5966GS>Bchs[RNAi] - RU486	5966GS>Bchs[RNAi] - rapamycin	5966GS>Bchs[RNAi] - RU486+rapamycin
5966GS>Bchs[RNAi] - EtOH	62.5	80	149	30			*	0.93501	7.66665e-07	0.343856
5966GS>Bchs[RNAi] - RU486	62.5	80	159	20	0	0				7.36922e-07
5966GS>Bchs[RNAi] - rapamycin	67	76	143	36	0.072	-0.05				4.3442e-09
5966GS>Bchs[RNAi] - RU486+rapamycin	62.5	78	161	18	0	-0.025
B. Cox Proportional Hazard (CPH) analysis
Details	Coefficient	Coefficient (estimate)	exp(coeff)	SE (coeff)	z	p
dead = 612	rapamycin	-0.553	0.576	0.119	-4.64	3.5e-06
censored = 104	RU486	-0.003	1	0.114	0.03	0.98
	RU486:rapamycin	0.662	1.939	0.163	4.05	5.2e-05
