# Supplementary material for: A TORC1-histone axis regulates chromatin organisation and non-canonical induction of autophagy to ameliorate ageing
Source: eLife. 2021 May 14;10:e62233. doi: 10.7554/eLife.62233 (PMC8186904; doi:10.7554/eLife.62233)
Supplement: Supplementary file 7. — Related to Figure 7. [file elife-62233-supp7.xlsx]

## Sheet: Supplementary file 7
Supplementary file 7. Over-expression of Bchs in enterocytes extends lifespan in females.
Genotype/Treatment	Median Lifespan (days)	Maximum Lifespan (days)	n Dead	n Censored	% Increase (med) vs control	% Increase (max) vs control	p-value (log rank) vs control	Control
5966GS>Bchs - EtOH	69	83	177	22				*
5966GS>Bchs - RU486	71	90	170	29	0.0289855	0.0843373	4.91687e-06
